# Supplementary material for: Importance of EMT Factor ZEB1 in cDC1 “MutuDC Line” Mediated Induction of Th1 Immune Response
Source: Front Immunol. 2018 Nov 13;9:2604. doi: 10.3389/fimmu.2018.02604 (PMC6243008; doi:10.3389/fimmu.2018.02604)
Supplement: Supplementary file 4 [file Table_4.XLSX]

## Sheet: Zeb1_ChIP-seq annotated_peaks
PeakID	Chr	Start	End	Strand	Peak Score	Focus Ratio/Region Size	Annotation	Detailed Annotation	Distance to TSS	Nearest PromoterID	Entrez ID	Nearest Unigene	Nearest Refseq	Nearest Ensembl	Gene Name	Gene Alias	Gene Description	Gene Type
chr2-1	chr2	98667077	98667277	+	18297.6	0.884	Intergenic	GSAT_MM|Satellite|Satellite	1199520	NM_178725	241568	Mm.241682	NM_178725	ENSMUSG00000050587	Lrrc4c	6430556C10Rik|NGL-1	leucine rich repeat containing 4C	protein-coding
chr2-2	chr2	98662552	98662752	+	3697	0.837	Intergenic	SYNREP_MM|Satellite|Satellite	1194995	NM_178725	241568	Mm.241682	NM_178725	ENSMUSG00000050587	Lrrc4c	6430556C10Rik|NGL-1	leucine rich repeat containing 4C	protein-coding
chr12-1	chr12	3109880	3110080	+	3312.8	0.999	Intergenic	GSAT_MM|Satellite|Satellite	-125811	NR_015551	74173	Mm.309774	NM_028796	ENSMUSG00000079179	Rab10os	1700012B15Rik|1810036A22Rik	RAB10, member RAS oncogene family, opposite strand	ncRNA
chr6-1	chr6	103649097	103649297	+	1899.1	0.999	intron (NM_007697, intron 4 of 26)	SYNREP_MM|Satellite|Satellite	138321	NM_007697	12661	Mm.251288	NM_007697	ENSMUSG00000030077	Chl1	A530023M13Rik|AI465420|CALL|LICAM2	cell adhesion molecule L1-like	protein-coding
chr9-2	chr9	3000391	3000591	+	1132	0.954	Intergenic	GSAT_MM|Satellite|Satellite	38252	NR_039546	100628572		NR_039546	ENSMUSG00000106183	Mir101c	mir-101c|mmu-mir-101c	microRNA 101c	ncRNA
chr14-1	chr14	19417211	19417411	+	586.5	0.974	Intergenic	GSAT_MM|Satellite|Satellite	185276	NM_001024706	432825	Mm.327147	NM_001024706	ENSMUSG00000095024	Gm5458	EG432825	predicted gene 5458	protein-coding
chr9-4	chr9	3006710	3006910	+	435	0.996	Intergenic	GSAT_MM|Satellite|Satellite	31933	NR_039546	100628572		NR_039546	ENSMUSG00000106183	Mir101c	mir-101c|mmu-mir-101c	microRNA 101c	ncRNA
chr15-1	chr15	75086725	75086925	+	383.9	0.769	Intergenic	Intergenic	25124	NM_001099217	100041546	Mm.482110	NM_001099217	ENSMUSG00000022584	Ly6c2	Ly-6C.2|Ly-6C2	lymphocyte antigen 6 complex, locus C2	protein-coding
chr9-3	chr9	3024379	3024579	+	350.8	0.985	Intergenic	GSAT_MM|Satellite|Satellite	14264	NR_039546	100628572		NR_039546	ENSMUSG00000106183	Mir101c	mir-101c|mmu-mir-101c	microRNA 101c	ncRNA
chr9-5	chr9	3002038	3002238	+	322.9	0.985	Intergenic	GSAT_MM|Satellite|Satellite	36605	NR_039546	100628572		NR_039546	ENSMUSG00000106183	Mir101c	mir-101c|mmu-mir-101c	microRNA 101c	ncRNA
chr17-1	chr17	39847570	39847770	+	151.4	0.597	non-coding (NR_046233, exon 1 of 1)	non-coding (NR_046233, exon 1 of 1)	4673	NR_046233	100861531		NR_046233		Rn45s	-	45S pre-ribosomal RNA	rRNA
chr1-1	chr1	183299178	183299378	+	149.9	0.721	intron (NM_181732, intron 1 of 9)	RLTR33|LTR|ERVK	2218	NM_181732	108909	Mm.290502	NM_145626	ENSMUSG00000042901	Aida	2610208M17Rik|BC004835	axin interactor, dorsalization associated	protein-coding
chr9-7	chr9	3001322	3001522	+	146	0.795	Intergenic	GSAT_MM|Satellite|Satellite	37321	NR_039546	100628572		NR_039546	ENSMUSG00000106183	Mir101c	mir-101c|mmu-mir-101c	microRNA 101c	ncRNA
chr6-2	chr6	137017823	137018023	+	141.3	0.776	Intergenic	RLTR17B_Mm|LTR|ERVK	63400	NM_023898	78600	Mm.290622	NM_023898	ENSMUSG00000064330	Pde6h	A930033D18Rik|PDEgamma	phosphodiesterase 6H, cGMP-specific, cone, gamma	protein-coding
chr15-2	chr15	75085480	75085680	+	141	0.721	Intergenic	B1_Mm|SINE|Alu	26369	NM_001099217	100041546	Mm.482110	NM_001099217	ENSMUSG00000022584	Ly6c2	Ly-6C.2|Ly-6C2	lymphocyte antigen 6 complex, locus C2	protein-coding
chr9-6	chr9	123461938	123462138	+	132.9	0.992	3' UTR (NM_153168, exon 21 of 21)	3' UTR (NM_153168, exon 21 of 21)	-16663	NM_013860	29806	Mm.10987	NM_013860	ENSMUSG00000025239	Limd1	AW822033|D9Ertd192e	LIM domains containing 1	protein-coding
chr16-1	chr16	45390023	45390223	+	129	0.907	intron (NM_010818, intron 5 of 5)	intron (NM_010818, intron 5 of 5)	18930	NM_010818	17470	Mm.245851	NM_010818	ENSMUSG00000022661	Cd200	Mox2|OX2	CD200 antigen	protein-coding
chr15-3	chr15	101196237	101196437	+	104	0.758	intron (NM_007395, intron 3 of 8)	intron (NM_007395, intron 3 of 8)	2468	NR_105927	102466774		NR_105927	ENSMUSG00000106563	Mir6962	mmu-mir-6962	microRNA 6962	ncRNA
chr3-1	chr3	5860382	5860582	+	91.2	0.873	Intergenic	LSU-rRNA_Hsa|rRNA|rRNA	-284234	NM_001163305	19302	Mm.132336	NM_008994	ENSMUSG00000040374	Pex2	D3Ertd138e|PAF-1|PMP35|Pxmp3	peroxisomal biogenesis factor 2	protein-coding
chrUn_JH584304-3	chrUn_JH584304	27099	27299	+	81.1	0.635	Intergenic	Intergenic	32490	NR_003518	66776	Mm.247625	NR_003518		Pisd-ps3	4933439C20Rik	phosphatidylserine decarboxylase, pseudogene 3	pseudo
chr6-3	chr6	145306339	145306539	+	70.4	0.882	Intergenic	Intergenic	55887	NR_045598	100039495	Mm.121014	NR_045598	ENSMUSG00000086013	Gm15706	OTTMUSG00000025463	predicted gene 15706	ncRNA
chr19-1	chr19	18639644	18639844	+	65.7	0.873	intron (NM_145497, intron 3 of 8)	intron (NM_145497, intron 3 of 8)	7728	NM_145497	225994	Mm.211595	NM_145497	ENSMUSG00000037847	Nmrk1	AA408380|D630020N23Rik|Nrk1	nicotinamide riboside kinase 1	protein-coding
chr6-4	chr6	97205531	97205731	+	65.4	0.951	promoter-TSS (NM_001301859)	promoter-TSS (NM_001301859)	16	NM_001301858	22200	Mm.277626	NM_011666	ENSMUSG00000030061	Uba3	A830034N06Rik|AI256736|AI848246|AW546539|Ube1c	ubiquitin-like modifier activating enzyme 3	protein-coding
chr19-3	chr19	45650068	45650268	+	62.3	0.98	intron (NM_013907, intron 1 of 8)	B2_Mm2|SINE|B2	10025	NM_013907	30838	Mm.254739	NM_013907	ENSMUSG00000040913	Fbxw4	Dac|Fbw4|SHFM3|SHSF3|dactylin|dactylyn	F-box and WD-40 domain protein 4	protein-coding
chr19-2	chr19	29236704	29236904	+	59.7	0.856	Intergenic	Intergenic	-14999	NM_001048177	16452	Mm.275839	NM_008413	ENSMUSG00000024789	Jak2	Fd17	Janus kinase 2	protein-coding
chr16-2	chr16	19834115	19834315	+	58.6	0.87	Intergenic	MLTR25C|LTR|ERVK	50059	NR_027896	68162	Mm.35159	NR_015488		A930003A15Rik	AI853191	RIKEN cDNA A930003A15 gene	ncRNA
chr18-3	chr18	68692049	68692249	+	54.2	0.99	Intergenic	LSU-rRNA_Hsa|rRNA|rRNA	-47251	NR_105774	102465183		NR_105774	ENSMUSG00000099300	Mir6356	Gm27461|mmu-mir-6356	microRNA 6356	ncRNA
chr2-5	chr2	3964486	3964686	+	53.2	0.986	Intergenic	Intergenic	176555	NR_040500	73489	Mm.488103	NR_040500	ENSMUSG00000084859	1700080N15Rik	4933408D14Rik	RIKEN cDNA 1700080N15 gene	ncRNA
chr3-3	chr3	8246254	8246454	+	51.3	0.947	Intergenic	Intergenic	216744	NR_033512	620966	Mm.301719	NR_033512		Gm6194	1700003N22Rik|EG620966	transmembrane protein 189 pseudogene	pseudo
chr5-2	chr5	114856097	114856297	+	50.3	0.738	intron (NM_026263, intron 1 of 11)	(CAGTG)n|Simple_repeat|Simple_repeat	2483	NM_026263	67593	Mm.251409	NM_026263	ENSMUSG00000029564	4930519G04Rik	1700014B12Rik	RIKEN cDNA 4930519G04 gene	protein-coding
chr12-2	chr12	79803778	79803978	+	50.3	0.846	intron (NM_009014, intron 10 of 10)	B4A|SINE|B4	120855	NR_131075	77290	Mm.395042	NR_131073		9430078K24Rik	-	RIKEN cDNA 9430078K24 gene	ncRNA
chr1-2	chr1	88595911	88596111	+	50.3	0.583	Intergenic	(GTCTG)n|Simple_repeat|Simple_repeat	44494	NR_037971	100503197	Mm.99352	NR_037971	ENSMUSG00000100798	Gm19589	-	predicted gene, 19589	ncRNA
chr4-1	chr4	135494712	135494912	+	48.7	0.843	promoter-TSS (NM_028995)	promoter-TSS (NM_028995)	-308	NM_028995	74552	Mm.26548	NM_028995	ENSMUSG00000028803	Nipal3	9130020G22Rik|AI480660|Npal3	NIPA-like domain containing 3	protein-coding
chr8-1	chr8	61584707	61584907	+	48.2	0.853	intron (NM_001293772, intron 10 of 21)	L2a|LINE|L2	6362	NM_001293774	72333	Mm.29933	NM_001081390	ENSMUSG00000058056	Palld	2410003B16Rik|6030492A02	palladin, cytoskeletal associated protein	protein-coding
chr5-3	chr5	23386537	23386737	+	48	0.946	Intergenic	Intergenic	47716	NR_040469	269630	Mm.425231	NR_040469	ENSMUSG00000073147	5031425E22Rik	-	RIKEN cDNA 5031425E22 gene	ncRNA
chr12-3	chr12	76752902	76753102	+	47.2	0.744	Intergenic	Intergenic	-12571	NM_206534	211151	Mm.80970	NM_206534	ENSMUSG00000090258	Churc1	1700030P15Rik|My015|chch	churchill domain containing 1	protein-coding
chr12-5	chr12	78350904	78351104	+	46.1	0.978	intron (NM_145965, intron 2 of 22)	LSU-rRNA_Hsa|rRNA|rRNA	124349	NM_145965	268566	Mm.341742	NM_145965	ENSMUSG00000047454	Gphn	5730552E08Rik|AI662856|BC027112|C230040D23|GPH|GPHRYN|geph	gephyrin	protein-coding
chr3-2	chr3	93476270	93476470	+	45.6	0.876	Intergenic	Intergenic	7616	NM_027762	71325	Mm.68064	NM_027762	ENSMUSG00000027908	Tchhl1	5430400H23Rik|AA589420|S100a17|Thhl1	trichohyalin-like 1	protein-coding
chr7-2	chr7	80075008	80075208	+	45.4	0.745	non-coding (NR_045695, exon 1 of 3)	non-coding (NR_045695, exon 1 of 3)	149	NR_045695	100859962	Mm.392575	NR_045695	ENSMUSG00000108714	Gm21057	-	predicted gene, 21057	ncRNA
chr12-4	chr12	52690429	52690629	+	43.5	0.92	Intergenic	Intergenic	-8854	NM_198111	238161	Mm.310822	NM_198111	ENSMUSG00000061603	Akap6	AI482140|Akapalpha|Akapbeta|PRKA	A kinase (PRKA) anchor protein 6	protein-coding
chr13-1	chr13	93237586	93237786	+	43	0.834	Intergenic	Intergenic	-45403	NM_133905	100715	Mm.242865	NM_133905	ENSMUSG00000042167	Papd4	8030446C20Rik|AI649009|GLD-2|Gld2	PAP associated domain containing 4	protein-coding
chr6-5	chr6	125067484	125067684	+	42.7	0.713	promoter-TSS (NM_001163269)	promoter-TSS (NM_001163269)	-336	NM_001163269	381810	Mm.333386	NM_001163268	ENSMUSG00000067714	Lpar5	GPR93|Gm1072|Gpr92|LPA5	lysophosphatidic acid receptor 5	protein-coding
chr11-6	chr11	100398070	100398270	+	42.7	0.887	promoter-TSS (NM_010593)	promoter-TSS (NM_010593)	54	NR_132425	102635937	Mm.421398	NR_132425		Gm12348	OTTMUSG00000006271	predicted gene 12348	ncRNA
chr9-10	chr9	25347142	25347342	+	42.5	0.791	Intergenic	L1Md_F2|LINE|L1	94803	NM_001205367	235072	Mm.270259	NM_009859	ENSMUSG00000001833	2007-09-01	Cdc10|E430034N22	septin 7	protein-coding
chr6-7	chr6	128914034	128914234	+	42	0.827	Intergenic	Intergenic	17711	NR_106107	102465757		NR_106107	ENSMUSG00000098359	Mir7649	mmu-mir-7649	microRNA 7649	ncRNA
chr10-1	chr10	19514547	19514747	+	40.9	0.599	Intergenic	Intergenic	-77311	NM_010511	15979	Mm.549	NM_010511	ENSMUSG00000020009	Ifngr1	CD119|IFN-gammaR|Ifgr|Ifngr|Nktar	interferon gamma receptor 1	protein-coding
chr5-4	chr5	92042723	92042923	+	40.4	0.839	promoter-TSS (NM_001276315)	promoter-TSS (NM_001276315)	-127	NM_001276315	53886	Mm.44963	NM_016912	ENSMUSG00000029403	Cdkl2	5330436L21Rik|AI505225|KKIAMRE|Kkm	cyclin-dependent kinase-like 2 (CDC2-related kinase)	protein-coding
chr6-6	chr6	28421719	28421919	+	40.1	0.848	promoter-TSS (NM_028900)	promoter-TSS (NM_028900)	-95	NM_028900	74375	Mm.332950	NM_028900	ENSMUSG00000029708	Gcc1	4932417P04Rik	golgi coiled coil 1	protein-coding
chr2-6	chr2	119559097	119559297	+	40.1	0.705	intron (NM_019769, intron 1 of 6)	intron (NM_019769, intron 1 of 6)	11490	NM_019769	56398	Mm.214765	NM_019769	ENSMUSG00000014077	Chp1	1500003O03Rik|AA960066|AI046351|Cahp|Chp|Sid470p|p24|vac	calcineurin-like EF hand protein 1	protein-coding
chr12-7	chr12	113304328	113304528	+	38.8	0.85	Intergenic	Intergenic	118525	NM_153776	69195	Mm.313244	NM_153776	ENSMUSG00000049036	Tmem121	2410008J05Rik|Hole	transmembrane protein 121	protein-coding
chr17-8	chr17	50116784	50116984	+	37.8	0.748	intron (NM_181397, intron 2 of 9)	intron (NM_181397, intron 2 of 9)	73613	NM_181397	76438	Mm.41854	NM_181397	ENSMUSG00000039316	Rftn1	2310015N21Rik|AI853526	raftlin lipid raft linker 1	protein-coding
chr17-7	chr17	74440456	74440656	+	37.8	0.738	intron (NM_001033367, intron 5 of 8)	intron (NM_001033367, intron 5 of 8)	18552	NM_001033367	268973	Mm.311884	NM_001033367	ENSMUSG00000039193	Nlrc4	9530011P19Rik|CLAN|CLAN1|CLANA|CLANB|CLANC|CLAND|Card12|IPAF	NLR family, CARD domain containing 4	protein-coding
chr13-2	chr13	56120010	56120210	+	37	0.674	intron (NM_012015, intron 2 of 8)	intron (NM_012015, intron 2 of 8)	15440	NM_012015	26914	Mm.283802	NM_012015	ENSMUSG00000015937	H2afy	H2AF12M|mH2a1|macroH2A1	H2A histone family, member Y	protein-coding
chr17-9	chr17	21450364	21450564	+	36	0.77	promoter-TSS (NM_009558)	promoter-TSS (NM_009558)	90	NM_009558	22709	Mm.293030	NM_009558	ENSMUSG00000023892	Zfp51	Zfp-51|zfec12	zinc finger protein 51	protein-coding
chr7-5	chr7	46857448	46857648	+	35.7	0.714	Intergenic	RSINE1|SINE|B4	-3715	NM_013580	16833	Mm.16563	NM_013580	ENSMUSG00000030851	Ldhc	LDH-C4|Ldh-3|Ldh-x|Ldh3|Ldhc4	lactate dehydrogenase C	protein-coding
chr5-5	chr5	43948526	43948726	+	35.4	0.757	Intergenic	Intergenic	33173	NM_008009	14181	Mm.46053	NM_008009	ENSMUSG00000048373	Fgfbp1	FGF-BP|FGF-BP1|FGFBP-1	fibroblast growth factor binding protein 1	protein-coding
chrUn_JH584304-19	chrUn_JH584304	44521	44721	+	35.2	0.652	Intergenic	(TATG)n|Simple_repeat|Simple_repeat	15068	NR_003518	66776	Mm.247625	NR_003518		Pisd-ps3	4933439C20Rik	phosphatidylserine decarboxylase, pseudogene 3	pseudo
chr12-10	chr12	32245950	32246150	+	34.9	0.799	Intergenic	Intergenic	-37401	NM_001146200	30955	Mm.101369	NM_020272	ENSMUSG00000020573	Pik3cg	5830428L06Rik|PI3Kgamma|p110gamma	phosphoinositide-3-kinase, catalytic, gamma polypeptide	protein-coding
chr7-3	chr7	80778396	80778596	+	34.4	0.869	intron (NM_016721, intron 2 of 37)	intron (NM_016721, intron 2 of 37)	24835	NM_016721	29875	Mm.207619	NM_016721	ENSMUSG00000030536	Iqgap1	AA682088|D7Ertd237e|D7Ertd257e|mKIAA0051	IQ motif containing GTPase activating protein 1	protein-coding
chr2-7	chr2	71701436	71701636	+	34.4	0.792	intron (NR_039557, intron 2 of 3).2	intron (NR_039557, intron 2 of 3).2	-17881	NR_037979	381371	Mm.330284	NM_201366	ENSMUSG00000064263	Platr26	Gm1631	pluripotency associated transcript 26	ncRNA
chr2-8	chr2	3050139	3050339	+	34.4	0.865	Intergenic	ORR1A1|LTR|ERVL-MaLR	-63985	NM_001310434	269233	Mm.23044	NM_001081161	ENSMUSG00000050530	Fam171a1	9630050M13Rik|AA409679	family with sequence similarity 171, member A1	protein-coding
chr18-5	chr18	82469954	82470154	+	34.4	0.869	Intergenic	Intergenic	-5069	NM_010777	17196	Mm.252063	NM_010777	ENSMUSG00000041607	Mbp	C76307|Hmbpr|R75289|golli-mbp|jve|mld|shi	myelin basic protein	protein-coding
chrUn_GL456392-1	chrUn_GL456392	22035	22235	+	34.1	0.897	NA	GSAT_MM|Satellite|Satellite	NA	NA
chr19-4	chr19	38598284	38598484	+	33.9	0.835	intron (NM_019588, intron 1 of 31)	intron (NM_019588, intron 1 of 31)	74187	NM_019588	74055	Mm.34031	NM_019588	ENSMUSG00000024998	Plce1	4933403A21Rik|PLCepsilon|Plce|mKIAA1516	phospholipase C, epsilon 1	protein-coding
chr18-4	chr18	36559740	36559940	+	33.6	0.756	promoter-TSS (NM_175375)	promoter-TSS (NM_175375)	-763	NM_175375	108857	Mm.482287	NM_175375	ENSMUSG00000024483	Ankhd1	1110004O12Rik|4933432B13Rik|9130019P20Rik|A530027J04Rik|A630021B20Rik|AA571404|Mask|mFLJ00246|mKIAA1085	ankyrin repeat and KH domain containing 1	protein-coding
chr11-17	chr11	75206390	75206590	+	33.6	0.792	intron (NM_177708, intron 1 of 1)	intron (NM_177708, intron 1 of 1)	12497	NM_177708	237847	Mm.82661	NM_177708	ENSMUSG00000045287	Rtn4rl1	Ngr3|Ngrh2|Ngrl2	reticulon 4 receptor-like 1	protein-coding
chrUn_JH584304-21	chrUn_JH584304	881	1081	+	33.6	0.565	Intergenic	B3|SINE|B2	58708	NR_003518	66776	Mm.247625	NR_003518		Pisd-ps3	4933439C20Rik	phosphatidylserine decarboxylase, pseudogene 3	pseudo
chr16-3	chr16	44872927	44873127	+	33.6	0.848	intron (NM_206535, intron 1 of 5)	L1M4|LINE|L1	5930	NM_206535	271375	Mm.441535	NM_206535	ENSMUSG00000090176	Cd200r2	AY230198|Cd200r1l	Cd200 receptor 2	protein-coding
chr17-6	chr17	50115964	50116164	+	33.6	0.667	intron (NM_181397, intron 2 of 9)	intron (NM_181397, intron 2 of 9)	74433	NM_181397	76438	Mm.41854	NM_181397	ENSMUSG00000039316	Rftn1	2310015N21Rik|AI853526	raftlin lipid raft linker 1	protein-coding
chr10-2	chr10	128763643	128763843	+	33.4	0.83	intron (NM_001253704, intron 2 of 3)	intron (NM_001253704, intron 2 of 3)	15288	NM_001253704	78428	Mm.27358	NM_030100	ENSMUSG00000064030	Pym1	A030010B05Rik|Pym|Wibg	PYM homolog 1, exon junction complex associated factor	protein-coding
chr8-2	chr8	26123763	26123963	+	33.4	0.765	exon (NM_029965, exon 3 of 8)	exon (NM_029965, exon 3 of 8)	4483	NM_029965	77733	Mm.291906	NM_029965	ENSMUSG00000013878	Rnf170	6720407G21Rik|AI481227	ring finger protein 170	protein-coding
chr17-10	chr17	70963656	70963856	+	32.8	0.955	Intergenic	LSU-rRNA_Hsa|rRNA|rRNA	26760	NM_023402	67938	Mm.261329	NM_023402	ENSMUSG00000034868	Myl12b	1500001M02Rik|C77744|Mylc2b|RLC-B	myosin, light chain 12B, regulatory	protein-coding
chr15-4	chr15	7085602	7085802	+	32.6	0.911	Intergenic	Intergenic	-43870	NM_001113386	16880	Mm.149720	NM_013584	ENSMUSG00000054263	Lifr	A230075M04Rik|AW061234|LIF	leukemia inhibitory factor receptor	protein-coding
chr9-11	chr9	44477950	44478150	+	32.3	0.851	Intergenic	Intergenic	-21086	NM_030256	80288	Mm.370270	NM_030256	ENSMUSG00000063382	Bcl9l	B9L|BC003321|BCL9-2|DLNB11	B cell CLL/lymphoma 9-like	protein-coding
chr14-5	chr14	70880091	70880291	+	32.1	0.777	Intergenic	Intergenic	-9916	NM_001302095	14586	Mm.32619	NM_008115	ENSMUSG00000022103	Gfra2	-	glial cell line derived neurotrophic factor family receptor alpha 2	protein-coding
chr12-9	chr12	106017778	106017978	+	32.1	0.711	intron (NM_011705, intron 1 of 14)	intron (NM_011705, intron 1 of 14)	7615	NM_001029843	22367	Mm.2981	NM_011705	ENSMUSG00000021115	Vrk1	51PK	vaccinia related kinase 1	protein-coding
chr3-5	chr3	154185090	154185290	+	32.1	0.791	intron (NM_001081263, intron 2 of 21)	L1_Mur3|LINE|L1	145370	NM_010713	16875	Mm.15530	NM_010713	ENSMUSG00000096225	Lhx8	L3|Lhx7	LIM homeobox protein 8	protein-coding
chr6-12	chr6	129375168	129375368	+	31.8	0.771	TTS (NM_001204223)	TTS (NM_001204223)	10235	NM_027709	71183	Mm.79402	NM_027709	ENSMUSG00000030158	Clec12b	4933425B16Rik	C-type lectin domain family 12, member B	protein-coding
chr1-3	chr1	51805366	51805566	+	31.8	0.738	intron (NM_001290982, intron 7 of 28)	intron (NM_001290982, intron 7 of 28)	110512	NM_001290982	17912	Mm.3390	NM_010863	ENSMUSG00000018417	Myo1b	AA406997|MIH-L|MMIa	myosin IB	protein-coding
chr11-25	chr11	49249103	49249303	+	31.8	0.839	intron (NM_001110149, intron 1 of 1)	intron (NM_001110149, intron 1 of 1)	-1349	NM_001110150	17308	Mm.196933	NM_010794	ENSMUSG00000020346	Mgat1	Mgat-1	mannoside acetylglucosaminyltransferase 1	protein-coding
chr4-3	chr4	123558600	123558800	+	31.5	0.836	intron (NM_001199137, intron 1 of 92)	intron (NM_001199137, intron 1 of 92)	-57720	NR_105824	102465214		NR_105824	ENSMUSG00000099005	Mir6398	Gm27657|mmu-mir-6398	microRNA 6398	ncRNA
chr12-11	chr12	4279419	4279619	+	31.5	0.776	intron (NM_010881, intron 13 of 22)	B1F|SINE|Alu	-45225	NM_134046	52504	Mm.70546	NM_134046	ENSMUSG00000020652	Cenpo	2810429O05Rik|8430427C03Rik|D12Ertd482e	centromere protein O	protein-coding
chr9-13	chr9	57800530	57800730	+	31.5	0.831	intron (NM_019689, intron 3 of 7)	intron (NM_019689, intron 3 of 7)	33604	NM_019689	56380	Mm.425588	NM_019689	ENSMUSG00000004661	Arid3b	Bdp|Dri2	AT rich interactive domain 3B (BRIGHT-like)	protein-coding
chr1-6	chr1	95671947	95672147	+	31.3	0.816	Intergenic	Intergenic	-4453	NM_001159745	20452	Mm.306228	NM_009183	ENSMUSG00000040710	St8sia4	PST|PST-1|SIAT8-D|ST8SiaIV|Siat8d	ST8 alpha-N-acetyl-neuraminide alpha-2,8-sialyltransferase 4	protein-coding
chr13-4	chr13	95885112	95885312	+	31	0.781	intron (NM_027711, intron 1 of 35)	intron (NM_027711, intron 1 of 35)	6710	NM_027711	544963	Mm.38878	NM_027711	ENSMUSG00000021676	Iqgap2	4933417J23Rik|A630053O10|AI788777	IQ motif containing GTPase activating protein 2	protein-coding
chr4-2	chr4	62674132	62674332	+	31	0.939	5' UTR (NM_001310706, exon 1 of 7)	5' UTR (NM_001310706, exon 1 of 7)	258	NM_001310706	50780	Mm.286753	NM_019492	ENSMUSG00000059810	Rgs3	4930506N09Rik|C2PA-RGS3|C2pa|PDZ-RGS3|RGS3S	regulator of G-protein signaling 3	protein-coding
chr11-36	chr11	100905661	100905861	+	30.8	0.877	intron (NM_213659, intron 5 of 23)	intron (NM_213659, intron 5 of 23)	33779	NM_213660	20848	Mm.249934	NM_011486	ENSMUSG00000004040	Stat3	1110034C02Rik|AW109958|Aprf	signal transducer and activator of transcription 3	protein-coding
chr4-4	chr4	156087414	156087614	+	30.8	0.819	Intergenic	L1MB5|LINE|L1	-22484	NM_145557	230996	Mm.318925	NM_145557	ENSMUSG00000059939	9430015G10Rik	-	RIKEN cDNA 9430015G10 gene	protein-coding
chr5-6	chr5	20932639	20932839	+	30.5	0.849	intron (NM_001080977, intron 1 of 7)	ID|SINE|ID	-18250	NR_030699	320770	Mm.491217	NR_030699	ENSMUSG00000101013	A630072M18Rik	Aptr	RIKEN cDNA A630072M18 gene	ncRNA
chr11-27	chr11	3676427	3676627	+	30.5	0.796	intron (NM_198162, intron 8 of 25)	intron (NM_198162, intron 8 of 25)	17827	NM_198162	74522	Mm.139127	NM_198162	ENSMUSG00000034543	Morc2a	8430403M08Rik|Zcwcc1	microrchidia 2A	protein-coding
chr19-5	chr19	16064951	16065151	+	30.2	0.713	Intergenic	Intergenic	-67780	NM_008139	14682	Mm.439701	NM_008139	ENSMUSG00000024639	Gnaq	1110005L02Rik|6230401I02Rik|AA408290|AW060788|Dsk1|Dsk10|Galphaq|Gq|GqI	guanine nucleotide binding protein, alpha q polypeptide	protein-coding
chr8-4	chr8	116607649	116607849	+	30.2	0.644	intron (NM_029441, intron 2 of 6)	(CTTG)n|Simple_repeat|Simple_repeat	102734	NM_029297	75465	Mm.23114	NM_029297	ENSMUSG00000034467	Dynlrb2	1700009A04Rik|DNLC2B|Dncl2b	dynein light chain roadblock-type 2	protein-coding
chr1-4	chr1	61001896	61002096	+	30.2	0.797	Intergenic	Intergenic	24082	NM_017480	54167	Mm.42044	NM_017480	ENSMUSG00000026009	Icos	AILIM|CCLP|CRP-1|H4|Ly115	inducible T cell co-stimulator	protein-coding
chr1-11	chr1	165705758	165705958	+	30	0.799	intron (NM_178593, intron 1 of 6)	intron (NM_178593, intron 1 of 6)	2236	NM_178593	226594	Mm.265552	NM_178593	ENSMUSG00000040723	Rcsd1	A430105K13Rik|BC025872|CapZIP	RCSD domain containing 1	protein-coding
chr6-14	chr6	129232666	129232866	+	29.7	0.823	non-coding (NR_040268, exon 4 of 4)	non-coding (NR_040268, exon 4 of 4)	5279	NR_040265	76432	Mm.261738	NR_040265	ENSMUSG00000097354	2310001H17Rik	AI646108	RIKEN cDNA 2310001H17 gene	ncRNA
chr6-8	chr6	98575203	98575403	+	29.7	0.707	Intergenic	RMER15|LTR|ERVL	-232549	NM_001128092	330390	Mm.484161	NM_001128092	ENSMUSG00000090667	Gm765	-	predicted gene 765	protein-coding
chr1-5	chr1	34460088	34460288	+	29.5	0.733	intron (NM_011206, intron 1 of 14)	intron (NM_011206, intron 1 of 14)	442	NM_011206	19253	Mm.361	NM_011206	ENSMUSG00000026126	Ptpn18	FLP1|HSCF|PTP-HSCF|PTP-K1|Ptpk1	protein tyrosine phosphatase, non-receptor type 18	protein-coding
chr7-6	chr7	122315838	122316038	+	29.5	0.888	intron (NM_001316672, intron 2 of 16)	intron (NM_001316672, intron 2 of 16)	26813	NM_008855	18751	Mm.207496	NM_008855	ENSMUSG00000052889	Prkcb	PKC-B|PKC-Beta|Pkcb|Prkcb1|Prkcb2	protein kinase C, beta	protein-coding
chr8-5	chr8	126643016	126643216	+	29.5	0.699	Intergenic	RMER12C|LTR|ERVK	-49680	NM_001164598	270110	Mm.334918	NM_001164598	ENSMUSG00000051495	Irf2bp2	E130305N23Rik|IRF-2BP2	interferon regulatory factor 2 binding protein 2	protein-coding
chr3-6	chr3	154843189	154843389	+	28.9	0.879	intron (NM_177066, intron 21 of 24)	intron (NM_177066, intron 21 of 24)	132156	NM_175176	209601	Mm.331454	NM_175176	ENSMUSG00000078161	Erich3	1700013E18Rik|4922501L14Rik|5031409G23Rik|AI596448|Gm133	glutamate rich 3	protein-coding
chr6-10	chr6	108314087	108314287	+	28.9	0.875	intron (NM_010585, intron 4 of 61)	intron (NM_010585, intron 4 of 61)	101091	NM_010585	16438	Mm.227912	NM_010585	ENSMUSG00000030102	Itpr1	D6Pas2|ENSMUSG00000072853|Gm10429|IP3R 1|IP3R1|InsP3R|Ip3r|Itpr-1|P400|Pcp-1|Pcp1|insP3R1|opt|wblo	inositol 1,4,5-trisphosphate receptor 1	protein-coding
chr12-13	chr12	52283935	52284135	+	28.7	0.882	intron (NM_029760, intron 7 of 10)	intron (NM_029760, intron 7 of 10)	186289	NM_029760	76826	Mm.244781	NM_029760	ENSMUSG00000035142	Nubpl	2410170E07Rik	nucleotide binding protein-like	protein-coding
chr2-16	chr2	152787694	152787894	+	28.7	0.763	intron (NM_009743, intron 2 of 2)	intron (NM_009743, intron 2 of 2)	33621	NM_053091	84682	Mm.196668	NM_053091	ENSMUSG00000009876	Cox4i2	Cox4b|CoxIV-2	cytochrome c oxidase subunit IV isoform 2	protein-coding
chr17-13	chr17	34140736	34140936	+	28.4	0.86	Intergenic	Intergenic	-4580	NM_010388	15000	Mm.195060	NM_010388	ENSMUSG00000037548	H2-DMb2	H-2Mb2|H2-Mb2	histocompatibility 2, class II, locus Mb2	protein-coding
chr2-11	chr2	181436280	181436480	+	28.4	0.821	intron (NM_028125, intron 1 of 2)	intron (NM_028125, intron 1 of 2)	-11992	NM_027656	72147	Mm.486504	NM_027656	ENSMUSG00000027583	Zbtb46	2610019F01Rik|4933406L05Rik|BZEL|Btbd4	zinc finger and BTB domain containing 46	protein-coding
chr2-14	chr2	80888478	80888678	+	28.4	0.803	Intergenic	Intergenic	249314	NM_001190179	69482	Mm.29200	NM_027091	ENSMUSG00000026999	Nup35	2310006I24Rik|35kDa|5330402E05Rik|MP44|NO44	nucleoporin 35	protein-coding
chr7-7	chr7	125541845	125542045	+	28.4	0.771	Intergenic	Intergenic	-10337	NM_001008700	16190	Mm.233802	NM_010557	ENSMUSG00000030748	Il4ra	CD124|Il4r	interleukin 4 receptor, alpha	protein-coding
chr1-14	chr1	193181236	193181436	+	28.1	0.793	exon (NM_153137, exon 13 of 16)	exon (NM_153137, exon 13 of 16)	7759	NM_181048	319266	Mm.482460	NM_181048	ENSMUSG00000079144	A130010J15Rik	-	RIKEN cDNA A130010J15 gene	protein-coding
chr6-11	chr6	134443337	134443537	+	27.9	0.641	Intergenic	Intergenic	47108	NM_025778	66813	Mm.474472	NM_025778	ENSMUSG00000030200	Bcl2l14	4930452K23Rik|4933405K19Rik|9030625M01Rik|AI429211|Bclg	BCL2-like 14 (apoptosis facilitator)	protein-coding
chr8-11	chr8	56550829	56551029	+	27.9	0.91	promoter-TSS (NM_015791)	promoter-TSS (NM_015791)	-205	NM_015791	50753	Mm.251174	NM_015791	ENSMUSG00000038206	Fbxo8	Fbx8	F-box protein 8	protein-coding
chr2-12	chr2	119897909	119898109	+	27.6	0.79	intron (NM_001164274, intron 1 of 22)	intron (NM_001164274, intron 1 of 22)	781	NM_013720	29808	Mm.87532	NM_013720	ENSMUSG00000033943	Mga	AV312082|C130042M01Rik|C80739|D030062C11Rik|Mad5	MAX gene associated	protein-coding
chr15-7	chr15	25863108	25863308	+	27.6	0.696	intron (NM_001034851, intron 1 of 8)	HAL1|LINE|L1	19910	NM_001034851	66270	Mm.25311	NM_025459	ENSMUSG00000022270	Fam134b	1810015C04Rik|AU015349	family with sequence similarity 134, member B	protein-coding
chr3-8	chr3	88141967	88142167	+	27.6	0.831	promoter-TSS (NM_133665)	promoter-TSS (NM_133665)	-305	NM_001310587	17261	Mm.28184	NM_133665	ENSMUSG00000001419	Mef2d	C80750	myocyte enhancer factor 2D	protein-coding
chr14-6	chr14	47305038	47305238	+	27.6	0.915	intron (NM_178684, intron 1 of 3)	Lx5c|LINE|L1	6824	NM_178684	218975	Mm.212297	NM_178684	ENSMUSG00000021840	Mapk1ip1l	9130202B12|C130032J12Rik	mitogen-activated protein kinase 1 interacting protein 1-like	protein-coding
chr15-6	chr15	73423947	73424147	+	27.6	0.742	promoter-TSS (NM_001130409)	promoter-TSS (NM_001130409)	-856	NM_001130409	14083	Mm.254494	NM_007982	ENSMUSG00000022607	Ptk2	FAK|FRNK|Fadk|mKIAA4203|p125FAK	PTK2 protein tyrosine kinase 2	protein-coding
chr3-9	chr3	98005392	98005592	+	27.4	0.84	Intergenic	Intergenic	-8046	NM_010928	18129	Mm.485843	NM_010928	ENSMUSG00000027878	Notch2	AI853703|N2	notch 2	protein-coding
chr1-9	chr1	135224254	135224454	+	27.4	0.758	Intergenic	Intergenic	34118	NM_001163131	13710	Mm.441439	NM_007921	ENSMUSG00000003051	Elf3	ESE-1|ESX|jen	E74-like factor 3	protein-coding
chr6-13	chr6	38773694	38773894	+	27.4	0.804	intron (NM_010433, intron 2 of 14)	intron (NM_010433, intron 2 of 14)	63517	NM_001136065	15258	Mm.23790	NM_010433	ENSMUSG00000061436	Hipk2	1110014O20Rik|B230339E18Rik|Stank	homeodomain interacting protein kinase 2	protein-coding
chr10-3	chr10	82934746	82934946	+	27.1	0.771	Intergenic	Intergenic	-50651	NM_021439	58250	Mm.360747	NM_021439	ENSMUSG00000034612	Chst11	1110020P09Rik|C4ST|C4ST-1|C4ST1|C4s	carbohydrate sulfotransferase 11	protein-coding
chr11-29	chr11	35091140	35091340	+	27.1	0.831	Intergenic	Intergenic	-30216	NM_011412	20564	Mm.478604	NM_011412	ENSMUSG00000056427	Slit3	Slil2|Slit1|b2b2362.1Clo	slit homolog 3 (Drosophila)	protein-coding
chr17-14	chr17	18295871	18296071	+	26.8	0.833	Intergenic	RMER4A|LTR|ERVK	-2310	NM_001104542	627132	Mm.469862	NM_001104542	ENSMUSG00000079698	Vmn2r93	EG627132	vomeronasal 2, receptor 93	protein-coding
chr11-30	chr11	46059677	46059877	+	26.8	0.692	intron (NM_009616, intron 1 of 22)	B3A|SINE|B2	3793	NM_001291891	11492	Mm.89940	NM_009616	ENSMUSG00000011256	Adam19	AL024287|MADDAM|MTLNB|Mltnb	a disintegrin and metallopeptidase domain 19 (meltrin beta)	protein-coding
chr12-15	chr12	3338924	3339124	+	26.8	0.833	Intergenic	Intergenic	-26108	NM_008445	16570	Mm.7688	NM_008445	ENSMUSG00000020668	Kif3c	mKIAA4058	kinesin family member 3C	protein-coding
chr7-8	chr7	141215548	141215748	+	26.8	0.741	promoter-TSS (NM_025886)	promoter-TSS (NM_025886)	-212	NM_025886	66985	Mm.21202	NM_025886	ENSMUSG00000038618	Rassf7	2400009B11Rik|AW210608	Ras association (RalGDS/AF-6) domain family (N-terminal) member 7	protein-coding
chr12-17	chr12	3436632	3436832	+	26.8	0.693	intron (NM_172421, intron 1 of 10)	L1VL4|LINE|L1	9875	NM_172421	75302	Mm.120475	NM_172421	ENSMUSG00000037486	Asxl2	4930556B16Rik|mKIAA1685	additional sex combs like 2 (Drosophila)	protein-coding
chr5-8	chr5	103744634	103744834	+	26.8	0.825	Intergenic	Intergenic	-9428	NM_133919	17355	Mm.6949	NM_133919	ENSMUSG00000029313	Aff1	9630032B01Rik|AW319193|Af4|Mllt2h|Rob	AF4/FMR2 family, member 1	protein-coding
chr11-31	chr11	107784332	107784532	+	26.6	0.689	intron (NM_019431, intron 1 of 3)	(TAGG)n|Simple_repeat|Simple_repeat	10032	NM_019431	54377	Mm.103724	NM_019431	ENSMUSG00000020723	Cacng4	AI413107|AW491861	calcium channel, voltage-dependent, gamma subunit 4	protein-coding
chr4-5	chr4	43442796	43442996	+	26.6	0.697	5' UTR (NM_011571, exon 1 of 10)	5' UTR (NM_011571, exon 1 of 10)	619	NM_011571	21754	Mm.485441	NM_011571	ENSMUSG00000028458	Tesk1	AI326901	testis specific protein kinase 1	protein-coding
chr17-16	chr17	79291850	79292050	+	26.6	0.817	Intergenic	L1_Rod|LINE|L1	63141	NM_026514	260409	Mm.140601	NM_026514	ENSMUSG00000036533	Cdc42ep3	3200001F04Rik|AA986861|Borg2|Cep3|UB1	CDC42 effector protein (Rho GTPase binding) 3	protein-coding
chr15-5	chr15	25843675	25843875	+	26.3	0.846	intron (NM_001034851, intron 1 of 8)	intron (NM_001034851, intron 1 of 8)	477	NM_001034851	66270	Mm.25311	NM_025459	ENSMUSG00000022270	Fam134b	1810015C04Rik|AU015349	family with sequence similarity 134, member B	protein-coding
chr3-7	chr3	10342600	10342800	+	26.3	0.827	intron (NM_025512, intron 6 of 7)	RLTR20D|LTR|ERVK	-7044	NM_001010834	241877	Mm.442146	NM_001010834	ENSMUSG00000058921	Slc10a5	Gm405|mP5	solute carrier family 10 (sodium/bile acid cotransporter family), member 5	protein-coding
chr16-4	chr16	57391373	57391573	+	26.3	0.767	intron (NM_001040397, intron 1 of 4)	LSU-rRNA_Hsa|rRNA|rRNA	38196	NM_001040397	78749	Mm.328360	NM_001040397	ENSMUSG00000043336	Filip1l	4631422O05Rik|Doc1	filamin A interacting protein 1-like	protein-coding
chr1-8	chr1	134106760	134106960	+	26.3	0.826	Intergenic	Intergenic	-4382	NM_001284524	71884	Mm.328268	NM_027979	ENSMUSG00000026450	Chit1	2300002L19Rik	chitinase 1 (chitotriosidase)	protein-coding
chr18-6	chr18	56930737	56930937	+	26.3	0.854	Intergenic	L1_Rod|LINE|L1	-5289	NM_177115	320253	Mm.312623	NM_177115	ENSMUSG00000032656	March3	6330411I15Rik|A530081L18Rik|AI843639|MARCH-III	membrane-associated ring finger (C3HC4) 3	protein-coding
chr14-7	chr14	67885091	67885291	+	26.3	0.821	intron (NM_177780, intron 1 of 51)	intron (NM_177780, intron 1 of 51)	-25446	NR_105857	102465310		NR_105857	ENSMUSG00000098866	Mir6539	Gm27464|mir-6539|mmu-mir-6539	microRNA 6539	ncRNA
chr11-37	chr11	88614751	88614951	+	25.8	0.726	intron (NM_054043, intron 5 of 13)	intron (NM_054043, intron 5 of 13)	-4400	NR_131025	68397	Mm.426889	NR_131025		0610039H22Rik	-	RIKEN cDNA 0610039H22 gene	ncRNA
chr2-10	chr2	155295553	155295753	+	25.8	0.824	intron (NM_001004721, intron 10 of 11)	intron (NM_001004721, intron 10 of 11)	19289	NR_046364	66734	Mm.196239	NM_025735	ENSMUSG00000027602	Map1lc3a	1010001H21Rik|4922501H04Rik|LC3|LC3a	microtubule-associated protein 1 light chain 3 alpha	protein-coding
chr2-18	chr2	174076104	174076304	+	25.5	0.812	promoter-TSS (NM_001102423)	promoter-TSS (NM_001102423)	-847	NM_172675	228960	Mm.277977	NM_172675	ENSMUSG00000027522	Stx16	4930401D03|5430410K23Rik|6330500A18Rik|AI648908|AW553605|Syn16	syntaxin 16	protein-coding
chr19-6	chr19	5399779	5399979	+	25.5	0.84	Intergenic	Intergenic	-6936	NR_015545	74931	Mm.388511	NR_015545	ENSMUSG00000086938	4930481A15Rik	-	RIKEN cDNA 4930481A15 gene	ncRNA
chr9-17	chr9	120674833	120675033	+	25.5	0.716	Intergenic	Intergenic	97602	NR_073359	76100	Mm.48212	NR_073359	ENSMUSG00000052658	5830454E08Rik	-	RIKEN cDNA 5830454E08 gene	ncRNA
chr11-34	chr11	55005051	55005251	+	25.5	0.832	exon (NM_001110211, exon 9 of 25)	exon (NM_001110211, exon 9 of 25)	28320	NM_001110211	11749	Mm.265347	NM_013472	ENSMUSG00000018340	Anxa6	AW107198|Anx6|AnxVI|Cabm|Camb	annexin A6	protein-coding
chr1-15	chr1	191814372	191814572	+	25.5	0.888	Intergenic	Intergenic	-7001	NM_010892	18005	Mm.33773	NM_010892	ENSMUSG00000026622	Nek2	AA617254|C77054	NIMA (never in mitosis gene a)-related expressed kinase 2	protein-coding
chr11-33	chr11	121545654	121545854	+	25.5	0.832	intron (NM_029878, intron 14 of 38)	intron (NM_029878, intron 14 of 38)	-26412	NM_178763	319530	Mm.11395	NM_178763	ENSMUSG00000039238	Zfp750	A030007D23Rik|Znf750	zinc finger protein 750	protein-coding
chr12-26	chr12	32635227	32635427	+	25.3	0.747	Intergenic	Intergenic	-185008	NM_021524	59027	Mm.202727	NM_021524	ENSMUSG00000020572	Nampt	1110035O14Rik|AI314458|AI480535|NAmPRTase|Pbef|Pbef1|Visfatin	nicotinamide phosphoribosyltransferase	protein-coding
chr6-17	chr6	97294435	97294635	+	25.3	0.701	intron (NM_145148, intron 22 of 23)	intron (NM_145148, intron 22 of 23)	-41755	NM_001081157	320502	Mm.68163	NM_001081157	ENSMUSG00000044086	Lmod3	5430424A14Rik	leiomodin 3 (fetal)	protein-coding
chr17-12	chr17	23660383	23660583	+	25.3	0.787	promoter-TSS (NM_153784)	promoter-TSS (NM_153784)	-40	NM_153784	212733	Mm.59997	NM_153784	ENSMUSG00000043782	Ccdc64b	BICDR-2|Bicdl2	coiled-coil domain containing 64B	protein-coding
chr4-6	chr4	63942351	63942551	+	25	0.819	Intergenic	Intergenic	-81167	NM_009403	21949	Mm.4664	NM_009403	ENSMUSG00000028362	Tnfsf8	CD153|CD30LG|Cd30l|Tnlg3a	tumor necrosis factor (ligand) superfamily, member 8	protein-coding
chr12-18	chr12	116282809	116283009	+	25	0.703	intron (NM_028731, intron 1 of 21)	intron (NM_028731, intron 1 of 21)	1687	NM_028731	52635	Mm.273755	NM_028731	ENSMUSG00000021171	Esyt2	2410017M09Rik|4921504I16Rik|CHR2SYT|D12Ertd551e|Fam62b	extended synaptotagmin-like protein 2	protein-coding
chr16-9	chr16	13423991	13424191	+	24.8	0.807	Intergenic	RLTR11B|LTR|ERVK	-25432	NR_030549	100124432		NR_030549	ENSMUSG00000076972	Mir193b	Mir193|Mirn193b|mir-193b	microRNA 193b	ncRNA
chr11-35	chr11	9536368	9536568	+	24.8	0.792	intron (NM_178259, intron 47 of 61)	intron (NM_178259, intron 47 of 61)	344526	NM_178259	268379	Mm.39270	NM_178259	ENSMUSG00000004668	Abca13	9830132L24|A930002G16Rik|AI956815	ATP-binding cassette, sub-family A (ABC1), member 13	protein-coding
chr8-8	chr8	83907313	83907513	+	24.5	0.858	intron (NM_181039, intron 1 of 22)	intron (NM_181039, intron 1 of 22)	7315	NM_181039	330814	Mm.260733	NM_181039	ENSMUSG00000013033	Adgrl1	2900070I05Rik|AI182398|CLIBA|Lec2|Lphn1|mKIAA0821	adhesion G protein-coupled receptor L1	protein-coding
chr10-9	chr10	40576211	40576411	+	24.5	0.87	intron (NM_027572, intron 2 of 7)	(GA)n|Simple_repeat|Simple_repeat	5949	NM_027572	70840	Mm.332570	NM_027572	ENSMUSG00000019834	Slc22a16	4921504E14Rik|CT2|FLIPT2|OCT6|OKB1	solute carrier family 22 (organic cation transporter), member 16	protein-coding
chr15-8	chr15	73148355	73148555	+	24.5	0.788	intron (NM_153178, intron 1 of 18)	intron (NM_153178, intron 1 of 18)	36492	NM_153178	239528	Mm.23095	NM_153178	ENSMUSG00000036698	Ago2	1110029L17Rik|2310051F07Rik|AI225898|AL022874|AW546247|ENSMUSG00000072493|Eif2c2|Gerp95|Gm10365|mKIAA4215	argonaute RISC catalytic subunit 2	protein-coding
chr8-10	chr8	128103524	128103724	+	24.5	0.867	Intergenic	ORR1F|LTR|ERVL-MaLR	174601	NR_105822	102465212		NR_105822	ENSMUSG00000099326	Mir21c	Gm28013|mmu-mir-21c	microRNA 21c	ncRNA
chr4-9	chr4	6445274	6445474	+	24.5	0.715	intron (NM_010945, intron 1 of 30)	intron (NM_010945, intron 1 of 30)	8897	NM_010945	18201	Mm.3059	NM_010945	ENSMUSG00000028245	Nsmaf	AA959567|C630007J05|Fan	neutral sphingomyelinase (N-SMase) activation associated factor	protein-coding
chr16-7	chr16	57606916	57607116	+	24.5	0.88	promoter-TSS (NM_025599)	promoter-TSS (NM_025599)	-149	NM_025599	66497	Mm.425976	NM_025599	ENSMUSG00000022748	Cmss1	1110001A06Rik|2610528E23Rik|4930572F24Rik|AV099812|AV122629	cms small ribosomal subunit 1	protein-coding
chr7-9	chr7	41499755	41499955	+	24.5	0.772	promoter-TSS (NM_001033530)	promoter-TSS (NM_001033530)	35	NM_001033530	101835	Mm.370336	NM_001033530	ENSMUSG00000074166	AW146154	AI451288	expressed sequence AW146154	protein-coding
chr14-9	chr14	73123734	73123934	+	24.2	0.773	Intergenic	Intergenic	-18676	NM_001170694	105670	Mm.280068	NM_134083	ENSMUSG00000022106	Rcbtb2	2610028E02Rik|2810420M18Rik|AI448345|AW240694|Chc1l|RC/BTB2	regulator of chromosome condensation (RCC1) and BTB (POZ) domain containing protein 2	protein-coding
chr4-7	chr4	141860658	141860858	+	24	0.763	intron (NM_025994, intron 2 of 3)	intron (NM_025994, intron 2 of 3)	14162	NM_025994	27984	Mm.395598	NM_025994	ENSMUSG00000040659	Efhd2	2600015J22Rik|AA408606|D4Wsu27e	EF hand domain containing 2	protein-coding
chr8-7	chr8	109779434	109779634	+	24	0.802	intron (NM_009677, intron 1 of 23)	CT-rich|Low_complexity|Low_complexity	951	NM_001301211	11765	Mm.37210	NM_009677	ENSMUSG00000031731	Ap1g1	AA409002|AU041323|AW551707|Adtg|D8Ertd374e	adaptor protein complex AP-1, gamma 1 subunit	protein-coding
chr19-7	chr19	38092311	38092511	+	24	0.776	Intergenic	Intergenic	-4668	NM_181748	107221	Mm.35288	NM_181748	ENSMUSG00000054200	Ffar4	AI552415|GT01|Gpr120|Gpr129|KPG_013|O3far1|Pgr4	free fatty acid receptor 4	protein-coding
chr5-7	chr5	137333820	137334020	+	24	0.623	promoter-TSS (NM_031406)	promoter-TSS (NM_031406)	-338	NM_031406	83704	Mm.235625	NM_031406	ENSMUSG00000037344	Slc12a9	CIP1	solute carrier family 12 (potassium/chloride transporters), member 9	protein-coding
chr16-6	chr16	22808055	22808255	+	24	0.914	intron (NM_009967, intron 1 of 2)	intron (NM_009967, intron 1 of 2)	3255	NM_009967	12970	Mm.6253	NM_009967	ENSMUSG00000033501	Crygs	AI327013|Opj|rncat	crystallin, gamma S	protein-coding
chr11-46	chr11	101226527	101226727	+	24	0.849	promoter-TSS (NM_007970)	promoter-TSS (NM_007970)	-164	NM_007970	14055	Mm.5027	NM_007970	ENSMUSG00000006920	Ezh1	ENX-2	enhancer of zeste 1 polycomb repressive complex 2 subunit	protein-coding
chr9-20	chr9	114740451	114740651	+	23.7	0.847	intron (NM_026036, intron 3 of 3)	B4A|SINE|B4	9348	NM_026036	67213	Mm.28858	NM_026036	ENSMUSG00000032434	Cmtm6	2810051A14Rik|AA536733|Cklfsf6	CKLF-like MARVEL transmembrane domain containing 6	protein-coding
chr2-13	chr2	5930699	5930899	+	23.7	0.791	exon (NM_001081131, exon 3 of 17)	exon (NM_001081131, exon 3 of 17)	11993	NM_001081131	209692	Mm.222517	NM_001081131	ENSMUSG00000025815	Dhtkd1	C330018I04Rik	dehydrogenase E1 and transketolase domain containing 1	protein-coding
chr14-8	chr14	102962103	102962303	+	23.7	0.897	Intergenic	Intergenic	20429	NR_039592	100628599		NR_039592	ENSMUSG00000092901	Mir5130	mir-5130|mmu-mir-5130|mu-mir-5130	microRNA 5130	ncRNA
chr9-19	chr9	46010627	46010827	+	23.7	0.812	Intergenic	ID_B1|SINE|B4	-2093	NM_027498	70661	Mm.219459	NM_027498	ENSMUSG00000034135	Sik3	5730525O22Rik|9030204A07Rik|AI447252|AI846254|AI849445|Qsk|SIK-3|mKIAA0999	SIK family kinase 3	protein-coding
chr15-10	chr15	100915101	100915301	+	23.7	0.841	intron (NM_001077499, intron 1 of 26)	intron (NM_001077499, intron 1 of 26)	-21070	NM_011323	20273	Mm.385012	NM_011323	ENSMUSG00000023033	Scn8a	AI853486|C630029C19Rik|NaCh6|Nav1.6|dmu|med|mnd-2|mnd2|nmf2|nmf335|nmf58|nur14|seal	sodium channel, voltage-gated, type VIII, alpha	protein-coding
chr16-8	chr16	10562456	10562656	+	23.7	0.85	intron (NM_001204229, intron 2 of 22)	intron (NM_001204229, intron 2 of 22)	17217	NM_001204229	74374	Mm.159176	NM_177562	ENSMUSG00000068663	Clec16a	4932416N17Rik|curt|mKIAA0350	C-type lectin domain family 16, member A	protein-coding
chr7-15	chr7	43984953	43985153	+	23.7	0.805	Intergenic	Intergenic	8992	NM_010116	13648	Mm.440884	NM_010116	ENSMUSG00000059042	Klk1b9	EGF-BP C|Egfbp-3|Egfbp3|KAL|Klk9|kallikrein|mGk-9	kallikrein 1-related peptidase b9	protein-coding
chr17-11	chr17	72934336	72934536	+	23.7	0.769	intron (NM_029999, intron 2 of 2)	intron (NM_029999, intron 2 of 2)	16131	NM_029999	77889	Mm.154109	NM_029999	ENSMUSG00000024063	Lbh	1810009F10Rik|6720416L16Rik	limb-bud and heart	protein-coding
chr13-5	chr13	33072191	33072391	+	23.7	0.701	Intergenic	Intergenic	-11812	NM_173052	282663	Mm.314490	NM_173052	ENSMUSG00000051029	Serpinb1b	6330533H24Rik|EIB|Serpin1b1|ovalbumin	serine (or cysteine) peptidase inhibitor, clade B, member 1b	protein-coding
chr7-13	chr7	119900027	119900227	+	23.5	0.903	promoter-TSS (NR_126475)	promoter-TSS (NR_126475)	16	NR_126475	73919	Mm.46381	NM_029610	ENSMUSG00000030922	Lyrm1	1110065L10Rik|2310004B22Rik|4930404J24Rik	LYR motif containing 1	protein-coding
chr13-6	chr13	73434773	73434973	+	23.5	0.802	Intergenic	Intergenic	-32510	NM_145376	210992	Mm.284649	NM_145376	ENSMUSG00000021608	Lpcat1	2900035H07Rik|Aytl2|BB137372|BC005662|C87117|LPCAT|rd11	lysophosphatidylcholine acyltransferase 1	protein-coding
chr6-22	chr6	108717819	108718019	+	23.5	0.851	Intergenic	Intergenic	-56985	NR_104577	75394	Mm.395061	NR_040757	ENSMUSG00000087341	0610040F04Rik	-	RIKEN cDNA 0610040F04 gene	ncRNA
chr6-16	chr6	129349714	129349914	+	23.5	0.629	promoter-TSS (NM_177686)	promoter-TSS (NM_177686)	-430	NM_177686	232413	Mm.90241	NM_177686	ENSMUSG00000053063	Clec12a	CLL-1|D230024O04|KLRL1|Micl	C-type lectin domain family 12, member a	protein-coding
chr5-20	chr5	114886585	114886785	+	23.5	0.8	Intergenic	RLTR13C2|LTR|ERVK	-10249	NM_011854	23962	Mm.228363	NM_011854	ENSMUSG00000029561	Oasl2	M1204|Mmu-OASL|Oasl	2'-5' oligoadenylate synthetase-like 2	protein-coding
chr9-18	chr9	44936751	44936951	+	23.2	0.788	intron (NM_145400, intron 15 of 19)	ORR1F|LTR|ERVL-MaLR	-16109	NM_013795	27425	Mm.14663	NM_013795	ENSMUSG00000038717	Atp5l	4933437C06Rik	ATP synthase, H+ transporting, mitochondrial F0 complex, subunit G	protein-coding
chr1-13	chr1	171920998	171921198	+	23.2	0.74	intron (NM_030710, intron 1 of 7)	intron (NM_030710, intron 1 of 7)	3561	NM_030710	30925	Mm.486404	NM_030710	ENSMUSG00000015314	Slamf6	KAL1|KAL1b|Ly108|NTB-A|NTBA|SF2000	SLAM family member 6	protein-coding
chr10-4	chr10	127658040	127658240	+	23.2	0.836	intron (NM_009284, intron 16 of 21)	intron (NM_009284, intron 16 of 21)	8563	NM_001122895	17937	Mm.336898	NM_008668	ENSMUSG00000025402	Nab2	AI451907	Ngfi-A binding protein 2	protein-coding
chr12-36	chr12	85955833	85956033	+	22.9	0.721	intron (NM_001081423, intron 28 of 33)	intron (NM_001081423, intron 28 of 33)	123108	NM_009368	21809	Mm.3992	NM_009368	ENSMUSG00000021253	Tgfb3	TGF-beta-3|Tgfb-3	transforming growth factor, beta 3	protein-coding
chr2-17	chr2	70885615	70885815	+	22.9	0.825	Intergenic	(CA)n|Simple_repeat|Simple_repeat	-60235	NM_172664	228012	Mm.136511	NM_172664	ENSMUSG00000041997	Tlk1	4930545J15Rik	tousled-like kinase 1	protein-coding
chr15-15	chr15	12028066	12028266	+	22.9	0.714	Intergenic	Intergenic	-32159	NM_011294	20024	Mm.41746	NM_011294	ENSMUSG00000022205	Sub1	AI842364|P15|P9|Pc4|Rpo2tc1	SUB1 homolog (S. cerevisiae)	protein-coding
chr10-5	chr10	22044315	22044515	+	22.9	0.805	Intergenic	RLTR13B1|LTR|ERVK	23664	NM_053264	114671	Mm.288194	NM_053264	ENSMUSG00000069712	4930444G20Rik	-	RIKEN cDNA 4930444G20 gene	protein-coding
chr4-18	chr4	63590682	63590882	+	22.9	0.782	Intergenic	Intergenic	9982	NR_028584	670833	Mm.32213	NR_028583	ENSMUSG00000084782	Gm11213	OTTMUSG00000000252	predicted gene 11213	ncRNA
chr2-15	chr2	38574767	38574967	+	22.9	0.807	intron (NM_021606, intron 7 of 9)	B1_Mur1|SINE|Alu	62991	NM_001159631	59126	Mm.143818	NM_021606	ENSMUSG00000026749	Nek6	1300007C09Rik	NIMA (never in mitosis gene a)-related expressed kinase 6	protein-coding
chr15-11	chr15	30611096	30611296	+	22.7	0.844	intron (NM_008729, intron 3 of 22)	intron (NM_008729, intron 3 of 22)	-427930	NR_045186	73784	Mm.66947	NR_045186		4930430F21Rik	-	RIKEN cDNA 4930430F21 gene	ncRNA
chr6-20	chr6	61181185	61181385	+	22.7	0.777	promoter-TSS (NR_040287)	promoter-TSS (NR_040287)	-475	NR_040287	100504262	Mm.438066	NR_040287		A730020E08Rik	-	RIKEN cDNA A730020E08 gene	ncRNA
chr4-19	chr4	150824985	150825185	+	22.7	0.797	Intergenic	Intergenic	29864	NR_040649	73348	Mm.396218	NR_040649	ENSMUSG00000078492	1700045H11Rik	-	RIKEN cDNA 1700045H11 gene	ncRNA
chr7-12	chr7	143495638	143495838	+	22.7	0.892	intron (NM_001042760, intron 8 of 10)	intron (NM_001042760, intron 8 of 10)	6786	NM_009434	22113	Mm.334344	NM_009434	ENSMUSG00000010760	Phlda2	Ipl|Tssc3	pleckstrin homology like domain, family A, member 2	protein-coding
chr12-23	chr12	17466821	17467021	+	22.7	0.761	Intergenic	Intergenic	-77952	NM_013614	18263	Mm.34102	NM_013614	ENSMUSG00000011179	Odc1	ODC	ornithine decarboxylase, structural 1	protein-coding
chr15-14	chr15	102095594	102095794	+	22.7	0.853	3' UTR (NM_145625, exon 15 of 15)	3' UTR (NM_145625, exon 15 of 15)	-7294	NM_153533	209039	Mm.29389	NM_153533	ENSMUSG00000037003	Tns2	C1-ten|Tenc1|nep|nph	tensin 2	protein-coding
chr12-24	chr12	35826986	35827186	+	22.7	0.628	Intergenic	Intergenic	-98535	NM_207531	403205	Mm.190508	NM_207531	ENSMUSG00000036231	Agr3	BCMP11|E030025L21Rik|Gm888	anterior gradient 3	protein-coding
chr5-11	chr5	114882330	114882530	+	22.4	0.807	intron (NM_026263, intron 11 of 11)	RLTR10|LTR|ERVK	-14504	NM_011854	23962	Mm.228363	NM_011854	ENSMUSG00000029561	Oasl2	M1204|Mmu-OASL|Oasl	2'-5' oligoadenylate synthetase-like 2	protein-coding
chr4-13	chr4	45036292	45036492	+	22.4	0.745	intron (NM_001024142, intron 10 of 10)	intron (NM_001024142, intron 10 of 10)	17783	NM_001285800	64424	Mm.282932	NM_022811	ENSMUSG00000028318	Polr1e	53kDa|AU042259|D030019D19Rik|Paf53|Praf1	polymerase (RNA) I polypeptide E	protein-coding
chr1-10	chr1	21031801	21032001	+	22.4	0.716	intron (NM_177409, intron 2 of 10)	intron (NM_177409, intron 2 of 10)	47324	NM_177409	170829	Mm.185680	NM_177409	ENSMUSG00000041779	Tram2	C330003D03Rik	translocating chain-associating membrane protein 2	protein-coding
chr11-42	chr11	55031208	55031408	+	22.4	0.762	intron (NM_013472, intron 1 of 25)	intron (NM_013472, intron 1 of 25)	2163	NM_001110211	11749	Mm.265347	NM_013472	ENSMUSG00000018340	Anxa6	AW107198|Anx6|AnxVI|Cabm|Camb	annexin A6	protein-coding
chr2-19	chr2	84655986	84656186	+	22.4	0.701	Intergenic	Intergenic	-2993	NM_001145100	100270744	Mm.393636	NM_001145100	ENSMUSG00000086598	Btbd18	Btbd18-ps|Gm13718|OTTMUSG00000013494	BTB (POZ) domain containing 18	protein-coding
chr5-10	chr5	104032556	104032756	+	22.2	0.76	Intergenic	Intergenic	-10860	NM_053262	114664	Mm.46019	NM_053262	ENSMUSG00000029311	Hsd17b11	Dhrs8|Pan1b|SDR2|retSDR2	hydroxysteroid (17-beta) dehydrogenase 11	protein-coding
chr6-31	chr6	17481147	17481347	+	22.2	0.833	intron (NM_008591, intron 1 of 21)	intron (NM_008591, intron 1 of 21)	17290	NM_008591	17295	Mm.86844	NM_008591	ENSMUSG00000009376	Met	AI838057|HGF|HGFR|Par4|c-Met	met proto-oncogene	protein-coding
chr3-11	chr3	108146748	108146948	+	22.2	0.777	promoter-TSS (NM_010306)	promoter-TSS (NM_010306)	-696	NM_010306	14679	Mm.271703	NM_010306	ENSMUSG00000000001	Gnai3	AI158965|AW537698|Galphai3|Gnai-3	guanine nucleotide binding protein (G protein), alpha inhibiting 3	protein-coding
chr4-8	chr4	133032794	133032994	+	22.2	0.795	intron (NM_146155, intron 2 of 6)	intron (NM_146155, intron 2 of 6)	21388	NM_146155	230793	Mm.31816	NM_146155	ENSMUSG00000037692	Ahdc1	D030015G18Rik	AT hook, DNA binding motif, containing 1	protein-coding
chr19-12	chr19	44067457	44067657	+	21.9	0.829	intron (NM_001164359, intron 3 of 11)	intron (NM_001164359, intron 3 of 11)	2129	NM_145502	226144	Mm.279865	NM_145502	ENSMUSG00000025198	Erlin1	2810439N09Rik|C80197|Keo4|Spfh1	ER lipid raft associated 1	protein-coding
chr1-16	chr1	43327196	43327396	+	21.9	0.844	Intergenic	L1MC1|LINE|L1	-118455	NM_010879	17974	Mm.389903	NM_010879	ENSMUSG00000066877	Nck2	4833426I10Rik|Grb4|NCKbeta|Nck-2	non-catalytic region of tyrosine kinase adaptor protein 2	protein-coding
chr8-15	chr8	34744344	34744544	+	21.9	0.866	Intergenic	Intergenic	-63166	NM_176933	319520	Mm.170276	NM_176933	ENSMUSG00000031530	Dusp4	2700078F24Rik|AI844617|BB104621|E130306H24Rik|MKP2	dual specificity phosphatase 4	protein-coding
chr17-15	chr17	5798131	5798331	+	21.9	0.664	promoter-TSS (NR_045081)	promoter-TSS (NR_045081)	-426	NR_045081	78512	Mm.23696	NR_045079	ENSMUSG00000096965	3300005D01Rik	-	RIKEN cDNA 3300005D01 gene	ncRNA
chr12-37	chr12	52454184	52454384	+	21.9	0.63	Intergenic	Intergenic	-61793	NM_009706	11855	Mm.35059	NM_009706	ENSMUSG00000035133	Arhgap5	p190-B|p190B	Rho GTPase activating protein 5	protein-coding
chr1-17	chr1	171437287	171437487	+	21.6	0.625	promoter-TSS (NM_172647)	promoter-TSS (NM_172647)	-174	NM_172647	16456	Mm.294882	NM_172647	ENSMUSG00000038235	F11r	9130004G24|AA638916|ESTM33|JAM|JAM-1|JAM-A|Jcam|Jcam1|Ly106	F11 receptor	protein-coding
chr1-24	chr1	44349440	44349640	+	21.6	0.869	Intergenic	L1Md_T|LINE|L1	-130609	NM_207281	403183	Mm.336176	NM_207281	ENSMUSG00000046828	Mettl21e	4832428D23Rik|Gm991	methyltransferase like 21E	protein-coding
chr7-11	chr7	101094818	101095018	+	21.6	0.863	Intergenic	Intergenic	-13857	NM_001146010	207278	Mm.263041	NM_199012	ENSMUSG00000030691	Fchsd2	BC034086|R74866|Sh3md3|mKIAA0769	FCH and double SH3 domains 2	protein-coding
chr12-30	chr12	32310077	32310277	+	21.6	0.819	Intergenic	Intergenic	-68612	NM_001162903	72123	Mm.341352	NM_028111	ENSMUSG00000090946	Ccdc71l	2010109K11Rik|AV375874	coiled-coil domain containing 71 like	protein-coding
chr15-12	chr15	11533070	11533270	+	21.6	0.914	Intergenic	Intergenic	-133512	NM_033074	110960	Mm.286061	NM_033074	ENSMUSG00000022241	Tars	D15Wsu59e|ThrRS	threonyl-tRNA synthetase	protein-coding
chr6-21	chr6	108289006	108289206	+	21.4	0.75	intron (NM_010585, intron 4 of 61)	intron (NM_010585, intron 4 of 61)	76010	NM_010585	16438	Mm.227912	NM_010585	ENSMUSG00000030102	Itpr1	D6Pas2|ENSMUSG00000072853|Gm10429|IP3R 1|IP3R1|InsP3R|Ip3r|Itpr-1|P400|Pcp-1|Pcp1|insP3R1|opt|wblo	inositol 1,4,5-trisphosphate receptor 1	protein-coding
chr5-13	chr5	21248878	21249078	+	21.4	0.838	intron (NM_175437, intron 14 of 30)	intron (NM_175437, intron 14 of 30)	62711	NM_175437	212167	Mm.121705	NM_175437	ENSMUSG00000039934	Gsap	A530088I07Rik|Pion	gamma-secretase activating protein	protein-coding
chr13-14	chr13	44869529	44869729	+	21.4	0.976	intron (NM_001205044, intron 4 of 18)	LSU-rRNA_Hsa|rRNA|rRNA	132467	NM_025772	94245	Mm.352311	NM_025772	ENSMUSG00000057531	Dtnbp1	5430437B18Rik|AW048963|Bloc1s8|dysbindin|sdy	dystrobrevin binding protein 1	protein-coding
chr11-40	chr11	119054439	119054639	+	21.4	0.854	Intergenic	Intergenic	-13626	NM_013926	30951	Mm.99953	NM_013926	ENSMUSG00000025578	Cbx8	Pc3	chromobox 8	protein-coding
chr19-8	chr19	8711952	8712152	+	21.4	0.802	intron (NM_008577, intron 2 of 8)	intron (NM_008577, intron 2 of 8)	1845	NM_008577	17254	Mm.4114	NM_008577	ENSMUSG00000010095	Slc3a2	4F2|4F2HC|AI314110|Cd98|Ly-10|Ly-m10|Ly10|Mdu1|Mgp-2hc|NACAE	solute carrier family 3 (activators of dibasic and neutral amino acid transport), member 2	protein-coding
chr4-15	chr4	8843205	8843405	+	21.4	0.706	intron (NM_001277149, intron 19 of 37)	intron (NM_001277149, intron 19 of 37)	152899	NM_001277149	320790	Mm.138792	NM_001033395	ENSMUSG00000041235	Chd7	A730019I05Rik|Cycn|Cyn|Dz|Edy|Flo|GENA 47|GENA 60|Gena 52|Lda|Mt|Obt|Todo|WBE1|Whi|metis	chromodomain helicase DNA binding protein 7	protein-coding
chr1-25	chr1	97667384	97667584	+	21.4	0.885	Intergenic	RLTR31_Mm|LTR|ERVK	-5466	NM_133825	52392	Mm.12309	NM_133825	ENSMUSG00000044768	D1Ertd622e	AI987691|AW047450	DNA segment, Chr 1, ERATO Doi 622, expressed	protein-coding
chr2-21	chr2	6380645	6380845	+	21.1	0.898	intron (NM_181399, intron 1 of 13)	intron (NM_181399, intron 1 of 13)	28009	NM_181399	98910	Mm.40673	NM_181399	ENSMUSG00000039046	Usp6nl	AI316785|RNTRE|TRE2NL|mKIAA0019	USP6 N-terminal like	protein-coding
chr11-49	chr11	77997768	77997968	+	21.1	0.81	intron (NM_174852, intron 2 of 14)	(TAGA)n|Simple_repeat|Simple_repeat	15052	NM_174852	268448	Mm.274329	NM_174852	ENSMUSG00000037791	Phf12	2410142K10Rik|F630045O13|PF1|mKIAA1523	PHD finger protein 12	protein-coding
chrX-2	chrX	13599461	13599661	+	21.1	0.817	intron (NM_001284503, intron 10 of 26)	intron (NM_001284503, intron 10 of 26)	-33208	NM_011823	23890	Mm.487326	NM_011823	ENSMUSG00000040229	Gpr34	Lypsr1	G protein-coupled receptor 34	protein-coding
chr13-7	chr13	35130714	35130914	+	21.1	0.825	Intergenic	Intergenic	-50809	NR_045616	100503727	Mm.32214	NR_045616	ENSMUSG00000102099	1700011B04Rik	-	RIKEN cDNA 1700011B04 gene	ncRNA
chr7-27	chr7	30830452	30830652	+	20.9	0.778	Intergenic	MT2B|LTR|ERVL	-6777	NM_146187	233079	Mm.97338	NM_146187	ENSMUSG00000051314	Ffar2	GPCR43|Gpr43	free fatty acid receptor 2	protein-coding
chr9-31	chr9	32204405	32204605	+	20.9	0.766	intron (NM_001195632, intron 9 of 21)	BGLII|LTR|ERVK	-19744	NM_177379	330914	Mm.46683	NM_177379	ENSMUSG00000041444	Arhgap32	3426406O18Rik|Gc-gap|Grit|Px-rics|Rics|mKIAA0712|p200Rhogap|p250Gap	Rho GTPase activating protein 32	protein-coding
chr12-53	chr12	87237038	87237238	+	20.9	0.758	intron (NM_027744, intron 2 of 7)	MLT2F|LTR|ERVL	1463	NM_027744	71275	Mm.79198	NM_027744	ENSMUSG00000072919	Noxred1	4933437F05Rik	NADP+ dependent oxidoreductase domain containing 1	protein-coding
chr5-17	chr5	123862551	123862751	+	20.9	0.806	TTS (NM_030701)	TTS (NM_030701)	2865	NM_030701	80885	Mm.440567	NM_030701	ENSMUSG00000045502	Hcar2	Gpr109a|Gpr109b|HM74|Niacr1|PUMA-G|Pumag|mHM74b	hydroxycarboxylic acid receptor 2	protein-coding
chr2-23	chr2	59817837	59818037	+	20.9	0.943	intron (NM_198294, intron 18 of 26)	intron (NM_198294, intron 18 of 26)	64669	NM_001159636	72137	Mm.288734	NM_028118	ENSMUSG00000026988	Wdsub1	1700048E19Rik|2610014F08Rik	WD repeat, SAM and U-box domain containing 1	protein-coding
chr12-42	chr12	80798217	80798417	+	20.9	0.772	intron (NM_178682, intron 1 of 5)	intron (NM_178682, intron 1 of 5)	7785	NM_001242419	217684	Mm.341776	NM_178682	ENSMUSG00000021133	Susd6	4933426M11Rik|mKIAA0247	sushi domain containing 6	protein-coding
chr19-10	chr19	44116204	44116404	+	20.9	0.644	intron (NM_001081077, intron 10 of 13)	ID_B1|SINE|B4	-8827	NM_001162410	12675	Mm.3996	NM_007700	ENSMUSG00000025199	Chuk	AI256658|Chuk1|Fbx24|Fbxo24|IKBKA|IKK1|Ikka|NFKBIKA	conserved helix-loop-helix ubiquitous kinase	protein-coding
chr11-39	chr11	9060878	9061078	+	20.9	0.714	intron (NM_001037928, intron 5 of 6)	intron (NM_001037928, intron 5 of 6)	-11987	NM_177576	194974	Mm.79210	NM_177576	ENSMUSG00000040985	Sun3	Sunc1	Sad1 and UNC84 domain containing 3	protein-coding
chr4-14	chr4	133169721	133169921	+	20.6	0.719	intron (NM_153423, intron 1 of 8)	B3A|SINE|B2	-25834	NR_105984	102466215		NR_105984	ENSMUSG00000099202	Mir7017	Gm27945|mmu-mir-7017	microRNA 7017	ncRNA
chr17-18	chr17	29510701	29510901	+	20.6	0.706	Intergenic	Intergenic	19756	NM_008842	18712	Mm.405293	NM_008842	ENSMUSG00000024014	Pim1	Pim-1	proviral integration site 1	protein-coding
chr11-48	chr11	86399296	86399496	+	20.6	0.86	Intergenic	Intergenic	-16448	NR_030571	100124487		NR_030571	ENSMUSG00000077049	Mir467c	Mirn467c|mir-467c	microRNA 467c	ncRNA
chr9-32	chr9	55241935	55242135	+	20.6	0.741	intron (NM_032002, intron 4 of 7)	intron (NM_032002, intron 4 of 7)	33100	NM_028049	71999	Mm.276429	NM_028049	ENSMUSG00000032309	Fbxo22	0610033L19Rik|1600016C16Rik	F-box protein 22	protein-coding
chr16-13	chr16	38408606	38408806	+	20.6	0.898	intron (NM_134102, intron 6 of 10)	intron (NM_134102, intron 6 of 10)	24439	NM_134102	85031	Mm.279805	NM_134102	ENSMUSG00000002847	Pla1a	AA986889|Ps-pla1|Pspla1	phospholipase A1 member A	protein-coding
chr2-24	chr2	91328816	91329016	+	20.6	0.759	intron (NM_001311144, intron 3 of 8)	intron (NM_001311144, intron 3 of 8)	63801	NM_023854	77038	Mm.43636	NM_023854	ENSMUSG00000027255	Arfgap2	2310032E02Rik|Zfp289	ADP-ribosylation factor GTPase activating protein 2	protein-coding
chr16-10	chr16	85084370	85084570	+	20.6	0.789	intron (NM_007471, intron 3 of 15)	intron (NM_007471, intron 3 of 15)	89237	NM_001198825	11820	Mm.277585	NM_007471	ENSMUSG00000022892	App	Abeta|Abpp|Adap|Ag|Cvap|E030013M08Rik|betaApp	amyloid beta (A4) precursor protein	protein-coding
chr2-20	chr2	127506189	127506389	+	20.6	0.677	intron (NM_019789, intron 2 of 8)	intron (NM_019789, intron 2 of 8)	15103	NM_001291005	56461	Mm.315292	NM_019789	ENSMUSG00000079056	Kcnip3	4933407H12Rik|AI413860|Csen|DREAM|KChIP3|R74849	Kv channel interacting protein 3, calsenilin	protein-coding
chr3-10	chr3	96497377	96497577	+	20.3	0.798	Intergenic	Intergenic	-27708	NM_027126	69585	Mm.171314	NM_027126	ENSMUSG00000038403	Hfe2	2310035L15Rik|5230400G09Rik|AI414844|AI789733|DL-M|HJV|Rgmc|hemojuvelin	hemochromatosis type 2 (juvenile)	protein-coding
chr14-14	chr14	63177674	63177874	+	20.3	0.9	exon (NM_010191, exon 3 of 10)	exon (NM_010191, exon 3 of 10)	1804	NM_010191	14137	Mm.474432	NM_010191	ENSMUSG00000021273	Fdft1	SQS|SS	farnesyl diphosphate farnesyl transferase 1	protein-coding
chr10-12	chr10	20296950	20297150	+	20.3	0.819	TTS (NR_105840)	TTS (NR_105840)	638	NR_105840	102466647		NR_105840	ENSMUSG00000098887	Mir6413	Gm27432|mmu-mir-6413	microRNA 6413	ncRNA
chr5-12	chr5	147352076	147352276	+	20.3	0.759	intron (NM_010229, intron 15 of 23)	L2c|LINE|L2	-29736	NM_001039678	231903	Mm.291286	NM_001039678	ENSMUSG00000075543	Urad	EG231903|Prhoxnb	ureidoimidazoline (2-oxo-4-hydroxy-4-carboxy-5) decarboxylase	protein-coding
chr16-15	chr16	94658635	94658835	+	20.3	0.822	intron (NM_007890, intron 2 of 11)	intron (NM_007890, intron 2 of 11)	87828	NM_001113389	13548	Mm.310973	NM_007890	ENSMUSG00000022897	Dyrk1a	2310043O08Rik|D16Ertd272e|D16Ertd493e|Dyrk|ENSMUSG00000074897|Gm10783|Mnbh|Mp86|mmb	dual-specificity tyrosine-(Y)-phosphorylation regulated kinase 1a	protein-coding
chr14-11	chr14	118132273	118132473	+	20.3	0.908	intron (NM_029578, intron 1 of 11)	intron (NM_029578, intron 1 of 11)	392	NM_029578	76355	Mm.251537	NM_029578	ENSMUSG00000022130	Tgds	2610017J16Rik|2610025M23Rik|AI648925	TDP-glucose 4,6-dehydratase	protein-coding
chr6-23	chr6	39379267	39379467	+	20.3	0.73	Intergenic	Intergenic	-1660	NM_028123	72144	Mm.482167	NM_028123	ENSMUSG00000029924	Slc37a3	2610507O21Rik|AU044904	solute carrier family 37 (glycerol-3-phosphate transporter), member 3	protein-coding
chr1-19	chr1	40045226	40045426	+	20.3	0.718	Intergenic	Intergenic	-39442	NM_010555	16178	Mm.1349	NM_010555	ENSMUSG00000026073	Il1r2	CD121b|Il1r-2	interleukin 1 receptor, type II	protein-coding
chr12-50	chr12	40709204	40709404	+	20.1	0.845	intron (NM_172803, intron 15 of 52)	intron (NM_172803, intron 15 of 52)	263251	NM_172803	238130	Mm.341423	NM_172803	ENSMUSG00000035954	Dock4	5330406C03|6330411N01Rik|AF263288|C030023J22|mKIAA0716	dedicator of cytokinesis 4	protein-coding
chr8-22	chr8	45510802	45511002	+	20.1	0.777	intron (NM_172752, intron 1 of 22)	intron (NM_172752, intron 1 of 22)	3114	NM_001205219	234214	Mm.211096	NM_172752	ENSMUSG00000031626	Sorbs2	2010203O03Rik|9430041O17Rik|A530071H08|Argbp2|mKIAA0777|nArgBP2	sorbin and SH3 domain containing 2	protein-coding
chr18-10	chr18	7405063	7405263	+	20.1	0.844	intron (NM_001161620, intron 11 of 12)	intron (NM_001161620, intron 11 of 12)	-107262	NM_001081393	74934	Mm.107918	NM_001081393	ENSMUSG00000061802	Armc4	4930463I21Rik|b2b227.1Clo|b2b643Clo	armadillo repeat containing 4	protein-coding
chr18-11	chr18	77803656	77803856	+	20.1	0.752	intron (NM_013831, intron 1 of 14)	intron (NM_013831, intron 1 of 14)	9206	NM_013831	19201	Mm.57174	NM_013831	ENSMUSG00000025429	Pstpip2	MAYP|cmo	proline-serine-threonine phosphatase-interacting protein 2	protein-coding
chr11-44	chr11	117067268	117067468	+	20.1	0.629	Intergenic	Intergenic	-9415	NR_027059	76972	Mm.309167	NR_027059	ENSMUSG00000086859	Snhg20	2810008D09Rik	small nucleolar RNA host gene 20	ncRNA
chr7-20	chr7	128119064	128119264	+	20.1	0.655	TTS (NM_008401)	TTS (NM_008401)	-10404	NM_021334	16411	Mm.22378	NM_021334	ENSMUSG00000030789	Itgax	AI449405|Cd11c|Cr4|N418	integrin alpha X	protein-coding
chr3-13	chr3	100515381	100515581	+	20.1	0.609	Intergenic	Intergenic	-26289	NM_001142952	74645	Mm.226900	NM_001142952	ENSMUSG00000044468	Fam46c	4930431B09Rik|AI449797	family with sequence similarity 46, member C	protein-coding
chr6-19	chr6	127447681	127447881	+	20.1	0.81	Intergenic	Intergenic	-5942	NM_181402	101187	Mm.110818	NM_181402	ENSMUSG00000037997	Parp11	5330431N24Rik|AI851877|ARTD11|HIN1L|PARP-11	poly (ADP-ribose) polymerase family, member 11	protein-coding
chr19-13	chr19	56797392	56797592	+	20.1	0.8	exon (NM_170757, exon 11 of 15)	exon (NM_170757, exon 11 of 15)	16191	NM_170757	213993	Mm.469677	NM_170757	ENSMUSG00000035173	Ccdc186	1810028B20Rik|A630007B06Rik|AI159700|Otg1	coiled-coil domain containing 186	protein-coding
chr11-63	chr11	55132593	55132793	+	19.8	0.845	intron (NM_172258, intron 7 of 10)	intron (NM_172258, intron 7 of 10)	19013	NM_172258	215332	Mm.87054	NM_172258	ENSMUSG00000049491	Slc36a3	PAT3|TRAMD2|tramdorin2	solute carrier family 36 (proton/amino acid symporter), member 3	protein-coding
chr19-23	chr19	53464812	53465012	+	19.8	0.811	promoter-TSS (NR_028427)	promoter-TSS (NR_028427)	-116	NR_028427	381232	Mm.248624	NR_028427	ENSMUSG00000097636	Mirt1	4833407H14Rik|5430437C04Rik|5830416P10Rik|ENSMUSG00000074788|Gm10758	myocardial infarction associated transcript 1	ncRNA
chr19-11	chr19	44349681	44349881	+	19.8	0.759	Intergenic	MLTR18D_MM|LTR|ERVK	16455	NM_183216	329065	Mm.313583	NM_183216	ENSMUSG00000050195	Scd4	ACOD4	stearoyl-coenzyme A desaturase 4	protein-coding
chr13-11	chr13	8870087	8870287	+	19.8	0.77	intron (NM_001039388, intron 1 of 13)	intron (NM_001039388, intron 1 of 13)	857	NM_001039389	207615	Mm.284654	NM_172445	ENSMUSG00000021147	Wdr37	-	WD repeat domain 37	protein-coding
chr19-19	chr19	38944647	38944847	+	19.8	0.748	intron (NM_008234, intron 8 of 21)	PB1D9|SINE|Alu	13757	NM_008234	15201	Mm.57223	NM_008234	ENSMUSG00000025001	Hells	AI323785|E130115I21Rik|LSH|Lysh|PASG|YFK8	helicase, lymphoid specific	protein-coding
chr2-26	chr2	128378504	128378704	+	19.8	0.848	intron (NR_028591, intron 1 of 1)	intron (NR_028591, intron 1 of 1)	50747	NR_028591	100043424	Mm.297222	NR_028589		Gm14005	OTTMUSG00000015351	predicted gene 14005	ncRNA
chr7-29	chr7	75362550	75362750	+	19.8	0.784	Intergenic	BGLII|LTR|ERVK	-53388	NM_153579	64176	Mm.273082	NM_153579	ENSMUSG00000053025	Sv2b	A830038F04Rik|AI850768|mKIAA0735	synaptic vesicle glycoprotein 2 b	protein-coding
chr4-21	chr4	49739645	49739845	+	19.8	0.823	intron (NM_001033351, intron 3 of 8)	intron (NM_001033351, intron 3 of 8)	-57762	NM_001004025	19059	Mm.46125	NM_001004025	ENSMUSG00000028310	Ppp3r2	CaNB2|CnB2	protein phosphatase 3, regulatory subunit B, alpha isoform (calcineurin B, type II)	protein-coding
chr19-9	chr19	55265348	55265548	+	19.5	0.76	intron (NM_027976, intron 1 of 21)	intron (NM_027976, intron 1 of 21)	12079	NM_027976	433256	Mm.292056	NM_027976	ENSMUSG00000024981	Acsl5	1700030F05Rik|ACS2|ACS5|Facl5	acyl-CoA synthetase long-chain family member 5	protein-coding
chr10-18	chr10	79594230	79594430	+	19.5	0.83	Intergenic	RMER4B|LTR|ERVK	-7194	NM_011583	21830	Mm.89197	NM_011583	ENSMUSG00000020317	Theg	-	testicular haploid expressed gene	protein-coding
chr15-17	chr15	9572102	9572302	+	19.5	0.771	Intergenic	Intergenic	-42326	NM_008372	16197	Mm.389	NM_008372	ENSMUSG00000003882	Il7r	CD127|IL-7Ralpha	interleukin 7 receptor	protein-coding
chr6-33	chr6	129705040	129705240	+	19.5	0.764	intron (NM_001012520, intron 1 of 5)	intron (NM_001012520, intron 1 of 5)	11992	NM_001012520	503550	Mm.376476	NM_001012520	ENSMUSG00000067610	Klri1	-	killer cell lectin-like receptor family I member 1	protein-coding
chr9-34	chr9	77551129	77551329	+	19.5	0.798	Intergenic	Intergenic	-6377	NM_001146048	214345	Mm.28534	NM_172528	ENSMUSG00000032352	Lrrc1	A430093J20Rik|AU016091|D030059I21|mKIAA4018	leucine rich repeat containing 1	protein-coding
chr4-11	chr4	150855955	150856155	+	19.5	0.789	intron (NM_133753, intron 1 of 3)	intron (NM_133753, intron 1 of 3)	964	NM_133753	74155	Mm.318841	NM_133753	ENSMUSG00000028967	Errfi1	1300002F13Rik|AI788755|Mig-6|Mig6|RALT	ERBB receptor feedback inhibitor 1	protein-coding
chr17-17	chr17	8234622	8234822	+	19.5	0.687	Intergenic	Intergenic	-1321	NM_001190333	12458	Mm.8007	NM_009835	ENSMUSG00000040899	Ccr6	CC-CKR-6|CCR-6|Cmkbr6|KY411	chemokine (C-C motif) receptor 6	protein-coding
chr8-14	chr8	75186225	75186425	+	19.3	0.683	Intergenic	Intergenic	-27619	NM_029182	75141	Mm.179267	NM_029182	ENSMUSG00000034472	Rasd2	4930526B11Rik|AU045414|Rhes|TEM-2|TEM2	RASD family, member 2	protein-coding
chr18-14	chr18	36384300	36384500	+	19.3	0.757	intron (NM_001081365, intron 2 of 2)	intron (NM_001081365, intron 2 of 2)	35776	NM_001081365	66060	Mm.272527	NM_001081365	ENSMUSG00000046727	Cystm1	0610010O12Rik	cysteine-rich transmembrane module containing 1	protein-coding
chr17-21	chr17	25984668	25984868	+	19.3	0.755	Intergenic	Intergenic	-19263	NM_015830	50817	Mm.216072	NM_015830	ENSMUSG00000037326	Capn15	Solh	calpain 15	protein-coding
chr11-53	chr11	3179853	3180053	+	19.3	0.962	intron (NM_030207, intron 4 of 32)	intron (NM_030207, intron 4 of 32)	13510	NM_030207	78887	Mm.394071	NM_030207	ENSMUSG00000023764	Sfi1	-	Sfi1 homolog, spindle assembly associated (yeast)	protein-coding
chr6-25	chr6	47265784	47265984	+	19.3	0.788	intron (NM_025771, intron 1 of 3)	intron (NM_025771, intron 1 of 3)	21488	NM_025771	66797	Mm.440084	NM_025771	ENSMUSG00000039419	Cntnap2	5430425M22Rik|Caspr2|mKIAA0868	contactin associated protein-like 2	protein-coding
chr8-18	chr8	46551806	46552006	+	19.3	0.806	promoter-TSS (NM_027973)	promoter-TSS (NM_027973)	-163	NM_027973	71876	Mm.22108	NM_027973	ENSMUSG00000031629	Cenpu	1700029A22Rik|Mlf1ip	centromere protein U	protein-coding
chr6-56	chr6	28460341	28460541	+	19.3	0.852	Intergenic	Intergenic	-11101	NM_011038	18506	Mm.8026	NM_011038	ENSMUSG00000029706	Pax4	Pax-4	paired box 4	protein-coding
chr13-8	chr13	119596845	119597045	+	19.3	0.677	intron (NM_001177666, intron 2 of 3)	intron (NM_001177666, intron 2 of 3)	-26874	NM_020279	56838	Mm.143745	NM_020279	ENSMUSG00000074715	Ccl28	CCK1|MEC|Scya28	chemokine (C-C motif) ligand 28	protein-coding
chr16-20	chr16	50415544	50415744	+	19	0.78	intron (NM_027444, intron 2 of 16)	intron (NM_027444, intron 2 of 16)	16745	NM_027444	70508	Mm.28940	NM_027444	ENSMUSG00000022641	Bbx	5530401J07Rik|5730403O13Rik	bobby sox HMG box containing	protein-coding
chr10-7	chr10	53374245	53374445	+	19	0.754	intron (NM_001204983, intron 1 of 12)	L2a|LINE|L2	5506	NM_001204983	100038725	Mm.441403	NM_001204983	ENSMUSG00000038594	Cep85l	ENSMUSG00000038594|Gm9766	centrosomal protein 85-like	protein-coding
chr7-41	chr7	118244261	118244461	+	19	0.745	promoter-TSS (NM_001031814)	promoter-TSS (NM_001031814)	454	NR_027879	67745	Mm.483404	NM_183267	ENSMUSG00000055159	4930583K01Rik	-	RIKEN cDNA 4930583K01 gene	ncRNA
chr2-30	chr2	31164395	31164595	+	19	0.755	intron (NM_178760, intron 1 of 17)	intron (NM_178760, intron 1 of 17)	12179	NM_178760	277463	Mm.236074	NM_178760	ENSMUSG00000000194	Gpr107	9930033D15Rik|AI790205|C530034M11|mKIAA1624	G protein-coupled receptor 107	protein-coding
chr15-13	chr15	78271731	78271931	+	19	0.75	Intergenic	MTD|LTR|ERVL-MaLR	13018	NR_106137	102465776		NR_106137	ENSMUSG00000098996	Mir7676-1	Gm27600|mmu-mir-7676-1	microRNA 7676-1	ncRNA
chr7-23	chr7	16062657	16062857	+	19	0.755	Intergenic	Intergenic	-9185	NM_001099277	666528	Mm.290718	NM_001099277	ENSMUSG00000078796	Zfp541	EG666528|Znf541	zinc finger protein 541	protein-coding
chr5-26	chr5	143497269	143497469	+	19	0.817	intron (NM_144915, intron 11 of 14)	RMER6A|LTR|ERVK	30624	NM_009007	19353	Mm.292510	NM_009007	ENSMUSG00000001847	Rac1	AL023026|D5Ertd559e	RAS-related C3 botulinum substrate 1	protein-coding
chr6-34	chr6	42397351	42397551	+	19	0.757	Intergenic	Intergenic	-2787	NM_001001452	387514	Mm.377921	NM_001001452	ENSMUSG00000046652	Tas2r143	Gm1404|Tas2r43|mt2r36	taste receptor, type 2, member 143	protein-coding
chr2-33	chr2	147033234	147033434	+	19	0.835	intron (NM_011917, intron 13 of 29)	L2a|LINE|L2	20274	NM_011917	24128	Mm.3065	NM_011917	ENSMUSG00000027433	Xrn2	-	5'-3' exoribonuclease 2	protein-coding
chr7-26	chr7	141911683	141911883	+	19	0.693	Intergenic	Intergenic	-9377	NM_023764	54473	Mm.103551	NM_023764	ENSMUSG00000025139	Tollip	4930403G24Rik|4931428G15Rik	toll interacting protein	protein-coding
chr11-50	chr11	97021786	97021986	+	18.8	0.83	exon (NM_031183, exon 2 of 2)	exon (NM_031183, exon 2 of 2)	4532	NR_133649	100127433	Mm.156282	NR_133649	ENSMUSG00000087067	Gm11532	OTTMUSG00000001860|Sp6os	predicted gene 11532	ncRNA
chr19-17	chr19	7931822	7932022	+	18.8	0.728	intron (NM_134256, intron 1 of 10)	RodERV21-int|LTR|ERV1	34105	NM_134256	171405	Mm.326517	NM_134256	ENSMUSG00000067656	Slc22a27	Oat9|mOAT6-L|mOAT6-S	solute carrier family 22, member 27	protein-coding
chr7-21	chr7	120850184	120850384	+	18.8	0.771	promoter-TSS (NM_001267711)	promoter-TSS (NM_001267711)	-905	NM_001267711	13631	Mm.25997	NM_007908	ENSMUSG00000035064	Eef2k	C86191|eEF-2K	eukaryotic elongation factor-2 kinase	protein-coding
chr18-15	chr18	37808853	37809053	+	18.8	0.849	exon (NM_033581, exon 1 of 4)	exon (NM_033581, exon 1 of 4)	2543	NM_033581	93706	Mm.247203	NM_033581	ENSMUSG00000102918	Pcdhgc3	PC43|Pcdh2	protocadherin gamma subfamily C, 3	protein-coding
chr6-70	chr6	140493273	140493473	+	18.8	0.734	intron (NM_144920, intron 3 of 30)	intron (NM_144920, intron 3 of 30)	69274	NM_144920	109135	Mm.247670	NM_144920	ENSMUSG00000030231	Plekha5	2810431N21Rik|AI428202|AK129423|AMH-Cre|Ayu21-9|Gt(pU21)9Imeg|Pepp2|Tg(AMH-cre)1Flor	pleckstrin homology domain containing, family A member 5	protein-coding
chr17-27	chr17	80563668	80563868	+	18.8	0.811	promoter-TSS (NM_001033443)	promoter-TSS (NM_001033443)	66	NM_001033443	381113	Mm.329216	NM_001033443	ENSMUSG00000033966	Cdkl4	AU067824|Gm942	cyclin-dependent kinase-like 4	protein-coding
chr12-49	chr12	112598667	112598867	+	18.8	0.816	intron (NM_198411, intron 1 of 22)	intron (NM_198411, intron 1 of 22)	9983	NM_198411	70435	Mm.250193	NM_198411	ENSMUSG00000037679	Inf2	2610204M08Rik|AA589465|AW125550|EG629699	inverted formin, FH2 and WH2 domain containing	protein-coding
chr3-18	chr3	37387364	37387564	+	18.8	0.689	intron (NM_008006, intron 1 of 2)	MTB_Mm|LTR|ERVL-MaLR	32132	NM_001291044	229228	Mm.436967	NM_153561	ENSMUSG00000050174	Nudt6	Asfgf2b	nudix (nucleoside diphosphate linked moiety X)-type motif 6	protein-coding
chr12-44	chr12	17712129	17712329	+	18.8	0.694	intron (NM_016677, intron 1 of 3)	intron (NM_016677, intron 1 of 3)	21415	NM_016677	53602	Mm.313619	NM_016677	ENSMUSG00000071379	Hpcal1	NVP-3|Nvp3|VILIP3|Vnsl3|Vsnl3	hippocalcin-like 1	protein-coding
chr3-14	chr3	154129474	154129674	+	18.8	0.735	intron (NM_001081263, intron 1 of 21)	MTD|LTR|ERVL-MaLR	156138	NM_001081263	242259	Mm.239962	NM_001081263	ENSMUSG00000028360	Slc44a5	AA117069|Gm422	solute carrier family 44, member 5	protein-coding
chr16-11	chr16	90045785	90045985	+	18.5	0.692	Intergenic	RSINE1|SINE|B4	-71186	NM_001145886	21844	Mm.310902	NM_009384	ENSMUSG00000002489	Tiam1	AI847750|D16Ium10|D16Ium10e	T cell lymphoma invasion and metastasis 1	protein-coding
chr4-45	chr4	120016832	120017032	+	18.5	0.782	intron (NM_010657, intron 2 of 8)	intron (NM_010657, intron 2 of 8)	-144492	NM_007902	13615	Mm.284855	NM_007902	ENSMUSG00000028635	Edn2	ET-2|PPET2|VIC	endothelin 2	protein-coding
chr16-14	chr16	45372258	45372458	+	18.5	0.892	Intergenic	Intergenic	36695	NM_010818	17470	Mm.245851	NM_010818	ENSMUSG00000022661	Cd200	Mox2|OX2	CD200 antigen	protein-coding
chr1-27	chr1	156708784	156708984	+	18.5	0.73	intron (NM_145413, intron 1 of 7)	intron (NM_145413, intron 1 of 7)	10026	NM_145413	215015	Mm.229107	NM_145413	ENSMUSG00000033557	Fam20b	C530043G21Rik|mKIAA0475	family with sequence similarity 20, member B	protein-coding
chr19-15	chr19	33109225	33109425	+	18.5	0.837	Intergenic	MTE2a|LTR|ERVL-MaLR	282970	NM_001167818	67795	Mm.204591	NM_001146342	ENSMUSG00000071573	Rnls	6530404N21Rik|AI452315|AW060440|C10orf59	renalase, FAD-dependent amine oxidase	protein-coding
chr4-17	chr4	127027909	127028109	+	18.5	0.766	intron (NR_045010, intron 9 of 11)	intron (NR_045010, intron 9 of 11)	6708	NM_023603	71514	Mm.257276	NM_023603	ENSMUSG00000028820	Sfpq	1110004P21Rik|2810416M14Rik|5730453G22Rik|9030402K04Rik|AU021830|D4Ertd314e|Gm12940|OTTMUSG00000009329|PSF|REP1	splicing factor proline/glutamine rich (polypyrimidine tract binding protein associated)	protein-coding
chr5-22	chr5	108460933	108461133	+	18.5	0.704	promoter-TSS (NM_172716)	promoter-TSS (NM_172716)	-299	NM_172716	69587	Mm.261218	NM_172716	ENSMUSG00000033623	Pcgf3	2310035N15Rik|AI662857|D630042K08Rik|DONG1|E430039C14|RNF3A|Rnf3	polycomb group ring finger 3	protein-coding
chr12-65	chr12	85661022	85661222	+	18.5	0.748	Intergenic	Intergenic	-25598	NM_016767	53314	Mm.6672	NM_016767	ENSMUSG00000034266	Batf	B-ATF|SFA-2	basic leucine zipper transcription factor, ATF-like	protein-coding
chr7-39	chr7	141264735	141264935	+	18.5	0.753	intron (NM_001252600, intron 4 of 8)	intron (NM_001252600, intron 4 of 8)	1589	NM_001252601	54123	Mm.3233	NM_016850	ENSMUSG00000025498	Irf7	-	interferon regulatory factor 7	protein-coding
chr12-69	chr12	52603820	52604020	+	18.5	0.664	Intergenic	Intergenic	-1598	NR_045910	73278	Mm.396209	NR_045910	ENSMUSG00000100315	1700031P21Rik	-	RIKEN cDNA 1700031P21 gene	ncRNA
chr6-29	chr6	86765764	86765964	+	18.5	0.798	intron (NM_013471, intron 1 of 12)	intron (NM_013471, intron 1 of 12)	27720	NM_013471	11746	Mm.259702	NM_013471	ENSMUSG00000029994	Anxa4	AI265406|AIV|AW106930|Anx4|Xanx-4	annexin A4	protein-coding
chr6-28	chr6	67142387	67142587	+	18.5	0.772	Intergenic	Intergenic	-105080	NM_007836	13197	Mm.72235	NM_007836	ENSMUSG00000036390	Gadd45a	AA545191|Ddit1|GADD45	growth arrest and DNA-damage-inducible 45 alpha	protein-coding
chr19-16	chr19	53423924	53424124	+	18.2	0.703	Intergenic	Intergenic	-33451	NM_172429	76479	Mm.313687	NM_172429	ENSMUSG00000025024	Smndc1	2410004J23Rik|4933440I19Rik	survival motor neuron domain containing 1	protein-coding
chr8-26	chr8	124739360	124739560	+	18.2	0.83	TTS (NM_001081120)	TTS (NM_001081120)	12349	NM_001081120	69627	Mm.271600	NM_001081120	ENSMUSG00000043068	Fam89a	2310031A18Rik	family with sequence similarity 89, member A	protein-coding
chr5-28	chr5	143038865	143039065	+	18.2	0.684	intron (NM_207110, intron 13 of 16)	intron (NM_207110, intron 13 of 16)	74055	NM_207110	108086	Mm.381440	NM_080561	ENSMUSG00000045078	Rnf216	2810055G22Rik|AI647468|AU019462|C86502|F830018F18Rik|TRIAD3|UIP83|Ubce7ip1	ring finger protein 216	protein-coding
chr6-38	chr6	72035881	72036081	+	18.2	0.909	intron (NR_046180, intron 1 of 2)	L1Md_A|LINE|L1	6547	NR_046180	330350	Mm.246787	NR_046180	ENSMUSG00000108356	9130221F21Rik	9130221F21	RIKEN cDNA 9130221F21 gene	ncRNA
chr1-26	chr1	64925867	64926067	+	18.2	0.847	intron (NM_001039493, intron 2 of 7)	intron (NM_001039493, intron 2 of 7)	30857	NM_001039493	241075	Mm.239534	NM_175509	ENSMUSG00000051344	Plekhm3	9430067K14Rik|A230102O09Rik|AI449570|DAPR|Plekhm1l	pleckstrin homology domain containing, family M, member 3	protein-coding
chr18-12	chr18	36304367	36304567	+	18.2	0.707	Intergenic	Intergenic	4366	NM_001267796	109169	Mm.426423	NM_001267796	ENSMUSG00000110185	Igip	6330403M23Rik	IgA inducing protein	protein-coding
chr11-61	chr11	46804967	46805167	+	18.2	0.75	Intergenic	RLTR10|LTR|ERVK	-5732	NM_178759	276891	Mm.69002	NM_178759	ENSMUSG00000055546	Timd4	B430010N18Rik|TIM-4|Tim4	T cell immunoglobulin and mucin domain containing 4	protein-coding
chr3-25	chr3	59207917	59208117	+	18.2	0.889	3' UTR (NM_028808, exon 2 of 2)	3' UTR (NM_028808, exon 2 of 2)	2865	NM_028808	74191	Mm.90067	NM_028808	ENSMUSG00000036362	P2ry13	2010001L06Rik|GPCR1|GPR94|Gpr86|P2Y13|P2yr13|SP174	purinergic receptor P2Y, G-protein coupled 13	protein-coding
chr11-56	chr11	68556009	68556209	+	18.2	0.833	promoter-TSS (NM_146004)	promoter-TSS (NM_146004)	-77	NM_146004	215723	Mm.131205	NM_146004	ENSMUSG00000048329	Mfsd6l	-	major facilitator superfamily domain containing 6-like	protein-coding
chr11-43	chr11	49205291	49205491	+	18	0.705	intron (NM_009562, intron 1 of 3)	intron (NM_009562, intron 1 of 3)	1891	NM_009562	22720	Mm.16650	NM_009562	ENSMUSG00000046311	Zfp62	-	zinc finger protein 62	protein-coding
chr17-24	chr17	12378612	12378812	+	18	0.81	exon (NM_008877, exon 1 of 19)	exon (NM_008877, exon 1 of 19)	103	NM_008877	18815	Mm.971	NM_008877	ENSMUSG00000059481	Plg	AI649309|Pg	plasminogen	protein-coding
chr12-58	chr12	112986943	112987143	+	18	0.742	intron (NM_028193, intron 3 of 17)	intron (NM_028193, intron 3 of 17)	10480	NM_201646	399566	Mm.440140	NM_201646	ENSMUSG00000002803	Btbd6	-	BTB (POZ) domain containing 6	protein-coding
chr18-16	chr18	39034892	39035092	+	18	0.781	intron (NM_175164, intron 1 of 22)	intron (NM_175164, intron 1 of 22)	41847	NM_175164	71302	Mm.329396	NM_175164	ENSMUSG00000036452	Arhgap26	1810044B20Rik|2610010G17Rik|4933432P15Rik|AI853435|mKIAA0621	Rho GTPase activating protein 26	protein-coding
chr2-34	chr2	168473075	168473275	+	18	0.753	Intergenic	Intergenic	117190	NM_001291178	18019	Mm.116802	NM_010899	ENSMUSG00000027544	Nfatc2	AI607462|NF-ATc2|NF-ATp|NFAT1|NFAT1-D|Nfatp	nuclear factor of activated T cells, cytoplasmic, calcineurin dependent 2	protein-coding
chr7-36	chr7	82809351	82809551	+	18	0.839	Intergenic	RMER10A|LTR|ERVL	-53807	NR_046004	77800	Mm.444811	NR_046004	ENSMUSG00000086690	4933406J10Rik	A930009F24Rik	RIKEN cDNA 4933406J10 gene	ncRNA
chr6-30	chr6	124289925	124290125	+	18	0.854	Intergenic	MMETn-int|LTR|ERVK	-14626	NM_001170395	93671	Mm.37426	NM_053094	ENSMUSG00000008845	Cd163	CD163v2|CD163v3	CD163 antigen	protein-coding
chr5-36	chr5	65007831	65008031	+	18	0.791	intron (NM_026667, intron 5 of 13)	ORR1F|LTR|ERVL-MaLR	37613	NR_030577	100124451		NR_030577	ENSMUSG00000077042	Mir574	Mirn574|mir-574|mmu-mir-574	microRNA 574	ncRNA
chr2-45	chr2	6718383	6718583	+	17.7	0.705	intron (NM_001310447, intron 1 of 11)	intron (NM_001310447, intron 1 of 11)	3179	NM_001310447	14007	Mm.398543	NM_010160	ENSMUSG00000002107	Celf2	B230218O03|B230345P09Rik|C88023|CELF-2|CUG-BP2|Cugbp2|D230046B21Rik|Etr-3|Napor|Napor-2|mETR-3	CUGBP, Elav-like family member 2	protein-coding
chr16-19	chr16	11103900	11104100	+	17.7	0.83	intron (NM_029582, intron 5 of 11)	intron (NM_029582, intron 5 of 11)	-16070	NM_134105	106200	Mm.291015	NM_029582	ENSMUSG00000022498	Txndc11	2810408E11Rik|AI427833|EFP1|Txdc11	thioredoxin domain containing 11	protein-coding
chr4-29	chr4	119959319	119959519	+	17.7	0.796	intron (NM_010657, intron 1 of 8)	intron (NM_010657, intron 1 of 8)	144741	NM_010657	16656	Mm.302758	NM_010657	ENSMUSG00000028634	Hivep3	2900056N03Rik|A130075N07|AI848000|E030045D18Rik|KBP-1|KBP1|Krc|Rc|Schnurri-3|Shn3|Zas3	human immunodeficiency virus type I enhancer binding protein 3	protein-coding
chr1-23	chr1	138930302	138930502	+	17.7	0.719	Intergenic	Intergenic	-33307	NM_001166501	329260	Mm.337604	NM_181347	ENSMUSG00000056268	Dennd1b	4632404N19Rik|4930467M19Rik|6820401H01Rik|F730008N07Rik	DENN/MADD domain containing 1B	protein-coding
chr7-40	chr7	112240666	112240866	+	17.7	0.745	intron (NM_001193305, intron 2 of 25)	intron (NM_001193305, intron 2 of 25)	14930	NM_001193305	320878	Mm.52312	NM_177282	ENSMUSG00000038244	Mical2	5330438E18Rik|9530064J02|MICAL-2|mKIAA0750	microtubule associated monooxygenase, calponin and LIM domain containing 2	protein-coding
chr11-54	chr11	95805134	95805334	+	17.7	0.761	Intergenic	Intergenic	-19266	NM_153104	237928	Mm.133075	NM_153104	ENSMUSG00000050860	Phospho1	D11Moh36|Phospo1	phosphatase, orphan 1	protein-coding
chr5-40	chr5	144086561	144086761	+	17.7	0.848	Intergenic	Intergenic	-13775	NM_001081109	231876	Mm.288726	NM_001081109	ENSMUSG00000038970	Lmtk2	2900041G10Rik|A330101P12Rik|BREK|KPI-2|KPI2|aatyk2|cprk	lemur tyrosine kinase 2	protein-coding
chr17-23	chr17	86471800	86472000	+	17.7	0.851	intron (NM_011104, intron 2 of 14)	B1_Mur3|SINE|Alu	-184722	NR_045435	72104	Mm.443401	NR_045435	ENSMUSG00000100738	2010106C02Rik	-	RIKEN cDNA 2010106C02 gene	ncRNA
chr11-52	chr11	117016379	117016579	+	17.7	0.88	Intergenic	Intergenic	-60304	NR_027059	76972	Mm.309167	NR_027059	ENSMUSG00000086859	Snhg20	2810008D09Rik	small nucleolar RNA host gene 20	ncRNA
chr14-17	chr14	20863858	20864058	+	17.7	0.793	Intergenic	Intergenic	27296	NM_008873	18792	Mm.4183	NM_008873	ENSMUSG00000021822	Plau	u-PA|uPA	plasminogen activator, urokinase	protein-coding
chr4-27	chr4	11763313	11763513	+	17.7	0.807	intron (NM_019753, intron 1 of 17)	intron (NM_019753, intron 1 of 17)	5256	NM_019753	12557	Mm.33402	NM_019753	ENSMUSG00000028217	Cdh17	HPT-1|HPT-1/LI	cadherin 17	protein-coding
chr10-13	chr10	123317452	123317652	+	17.7	0.773	intron (NR_045514, intron 1 of 5)	intron (NR_045514, intron 1 of 5)	53476	NM_001252387	268354	Mm.51939	NM_182807	ENSMUSG00000044071	Fam19a2	6330575M02|FAM19A2 TAFA-2|TAFA2|Tafa-2	family with sequence similarity 19, member A2	protein-coding
chr16-26	chr16	92822140	92822340	+	17.7	0.755	intron (NM_001111022, intron 2 of 6)	intron (NM_001111022, intron 2 of 6)	3834	NM_001111021	12394	Mm.4081	NM_009821	ENSMUSG00000022952	Runx1	AML1|CBF-alpha-2|Cbfa2|Pebp2a2|Pebpa2b	runt related transcription factor 1	protein-coding
chr13-13	chr13	119601933	119602133	+	17.7	0.71	intron (NM_001177666, intron 2 of 3)	intron (NM_001177666, intron 2 of 3)	-21786	NM_020279	56838	Mm.143745	NM_020279	ENSMUSG00000074715	Ccl28	CCK1|MEC|Scya28	chemokine (C-C motif) ligand 28	protein-coding
chr10-22	chr10	127041558	127041758	+	17.7	0.702	promoter-TSS (NM_001205036)	promoter-TSS (NM_001205036)	-264	NM_001205036	100504608	Mm.486142	NM_001205036	ENSMUSG00000080115	Mettl21b	-	methyltransferase like 21B	protein-coding
chr9-40	chr9	52810244	52810444	+	17.7	0.8	Intergenic	(TG)n|Simple_repeat|Simple_repeat	130481	NR_045333	382139	Mm.335162	NR_045333	ENSMUSG00000111020	Gm1715	-	predicted gene 1715	ncRNA
chr10-38	chr10	111574965	111575165	+	17.7	0.819	Intergenic	RLTR51B_Mm|LTR|ERVK?	19208	NR_045344	71321	Mm.410785	NR_045344	ENSMUSG00000097082	4933440J02Rik	-	RIKEN cDNA 4933440J02 gene	ncRNA
chr15-23	chr15	81821732	81821932	+	17.7	0.871	intron (NM_153484, intron 3 of 3)	intron (NM_153484, intron 3 of 3)	10418	NM_017376	21685	Mm.270278	NM_017376	ENSMUSG00000022389	Tef	2310028D20Rik	thyrotroph embryonic factor	protein-coding
chr10-14	chr10	83401040	83401240	+	17.5	0.887	Intergenic	MMETn-int|LTR|ERVK	40919	NM_026579	28109	Mm.196210	NM_026579	ENSMUSG00000020255	D10Wsu102e	AI747614|C430041I18Rik	DNA segment, Chr 10, Wayne State University 102, expressed	protein-coding
chr11-62	chr11	85581235	85581435	+	17.5	0.907	intron (NM_001166642, intron 22 of 24)	intron (NM_001166642, intron 22 of 24)	138409	NR_045875	71489	Mm.442482	NR_045875	ENSMUSG00000086199	Bcas3os1	8430403D17Rik	breast carcinoma amplified sequence 3, opposite strand 1	ncRNA
chr6-54	chr6	97839674	97839874	+	17.5	0.816	intron (NM_001113198, intron 1 of 9)	intron (NM_001113198, intron 1 of 9)	32716	NM_001113198	17342	Mm.333284	NM_008601	ENSMUSG00000035158	Mitf	BCC2|Bhlhe32|Gsfbcc2|Vitiligo|Wh|bw|mi|vit	microphthalmia-associated transcription factor	protein-coding
chr5-31	chr5	146606319	146606519	+	17.5	0.773	Intergenic	MTD|LTR|ERVL-MaLR	-21180	NM_001010941	14738	Mm.153539	NM_008151	ENSMUSG00000041468	Gpr12	Gpcr01|Gpcr12|Gpcr20|Gpcr21	G-protein coupled receptor 12	protein-coding
chr3-24	chr3	133750052	133750252	+	17.5	0.736	Intergenic	Intergenic	-205762	NM_001040400	214133	Mm.347816	NM_145989	ENSMUSG00000040943	Tet2	Ayu17-449|E130014J05Rik|mKIAA1546	tet methylcytosine dioxygenase 2	protein-coding
chr2-42	chr2	144556261	144556461	+	17.5	0.87	intron (NM_001252543, intron 1 of 19)	CpG	132	NM_001252545	27054	Mm.248492	NM_019787	ENSMUSG00000027429	Sec23b	-	SEC23 homolog B, COPII coat complex component	protein-coding
chr3-32	chr3	135686774	135686974	+	17.5	0.729	intron (NM_008689, intron 1 of 24)	intron (NM_008689, intron 1 of 24)	4673	NM_008689	18033	Mm.256765	NM_008689	ENSMUSG00000028163	Nfkb1	NF-KB1|NF-kappaB|NF-kappaB1|p105|p50|p50/p105	nuclear factor of kappa light polypeptide gene enhancer in B cells 1, p105	protein-coding
chr2-37	chr2	35256803	35257003	+	17.5	0.643	intron (NM_001206368, intron 1 of 16)	intron (NM_001206368, intron 1 of 16)	544	NM_001206368	227753	Mm.443	NM_146120	ENSMUSG00000026879	Gsn	ADF	gelsolin	protein-coding
chr13-38	chr13	40899988	40900188	+	17.5	0.806	intron (NM_008105, intron 1 of 2)	RMER15|LTR|ERVL	13330	NM_008105	14538	Mm.314757	NM_008105	ENSMUSG00000021360	Gcnt2	5330430K10Rik|IGnT|IGnTA|IGnTB|IGnTC	glucosaminyl (N-acetyl) transferase 2, I-branching enzyme	protein-coding
chr11-60	chr11	116522694	116522894	+	17.5	0.81	Intergenic	A-rich|Low_complexity|Low_complexity	-9117	NM_001172475	20698	Mm.20944	NM_011451	ENSMUSG00000061878	Sphk1	1110006G24Rik|Sk1|Spk1	sphingosine kinase 1	protein-coding
chr10-23	chr10	51445501	51445701	+	17.2	0.795	Intergenic	L1Md_F2|LINE|L1	-35011	NM_008147	14727	Mm.439661	NM_008147	ENSMUSG00000062593	Lilr4b	Gp49a|gp49	leukocyte immunoglobulin-like receptor, subfamily B, member 4B	protein-coding
chr11-57	chr11	87595262	87595462	+	17.2	0.815	intron (NM_133215, intron 2 of 18)	intron (NM_133215, intron 2 of 18)	3145	NM_133215	170749	Mm.399376	NM_133215	ENSMUSG00000018401	Mtmr4	AA596759|ESTM44|FYVE-DSP2|ZFYVE11|mKIAA0647	myotubularin related protein 4	protein-coding
chr18-19	chr18	25331041	25331241	+	17.2	0.91	intron (NM_001033532, intron 6 of 10)	Lx2|LINE|L1	162121	NM_001033532	225289	Mm.391081	NM_001033532	ENSMUSG00000033632	AW554918	4921538P22|AI461742|Kiaa1328|mKIAA1328	expressed sequence AW554918	protein-coding
chr7-19	chr7	104447777	104447977	+	17.2	0.667	intron (NM_009099, intron 1 of 7)	Lx|LINE|L1	17316	NM_009099	20128	Mm.295578	NM_009099	ENSMUSG00000030921	Trim30a	Rpt-1|Rpt1|Trim30	tripartite motif-containing 30A	protein-coding
chr19-21	chr19	47621598	47621798	+	17.2	0.852	intron (NM_009289, intron 9 of 18)	intron (NM_009289, intron 9 of 18)	41679	NM_001164639	20874	Mm.281011	NM_009289	ENSMUSG00000025060	Slk	9A2|AV021402|AW411554|Etk4|SMAK|Stk2|mKIAA0204|mSLK	STE20-like kinase	protein-coding
chr11-66	chr11	79658169	79658369	+	17.2	0.793	intron (NM_175543, intron 3 of 14)	intron (NM_175543, intron 3 of 14)	16817	NR_045898	72218	Mm.443271	NR_045898	ENSMUSG00000086569	Rab11fip4os2	1700020F10Rik|4930542H20Rik|Rab11fib4os2	RAB11 family interacting protein 4 (class II), opposite strand 2	ncRNA
chr1-22	chr1	128617655	128617855	+	17.2	0.743	Intergenic	Intergenic	-25456	NM_009911	12767	Mm.1401	NM_009911	ENSMUSG00000045382	Cxcr4	CD184|Cmkar4|LESTR|PB-CKR|PBSF/SDF-1|Sdf1r|b2b220Clo	chemokine (C-X-C motif) receptor 4	protein-coding
chr3-17	chr3	142696677	142696877	+	17.2	0.812	Intergenic	Intergenic	-4271	NM_173763	229905	Mm.289643	NM_173763	ENSMUSG00000040213	Kyat3	Ccbl2|KATIII|Kat3	kynurenine aminotransferase 3	protein-coding
chr17-31	chr17	16891695	16891895	+	17.2	0.852	Intergenic	L1Md_F|LINE|L1	-172308	NM_001005358	449000	Mm.483718	NM_001005358	ENSMUSG00000096696	Zfp960	-	zinc finger protein 960	protein-coding
chr16-17	chr16	45610472	45610672	+	17.2	0.753	intron (NM_008099, intron 1 of 4)	intron (NM_008099, intron 1 of 4)	132	NM_001159297	14525	Mm.4799	NM_008099	ENSMUSG00000022659	Gcsam	Gcet|Gcet2|M17|M17-L	germinal center associated, signaling and motility	protein-coding
chr4-20	chr4	46649920	46650120	+	17.2	0.774	exon (NM_198664, exon 1 of 13)	exon (NM_198664, exon 1 of 13)	179	NM_198664	381605	Mm.331595	NM_198664	ENSMUSG00000039813	Tbc1d2	A630005A06Rik|BC022630|Gm1037|PARIS-1|PARIS1	TBC1 domain family, member 2	protein-coding
chr1-30	chr1	195241619	195241819	+	17.2	0.88	Intergenic	CpG	-65004	NM_007758	12902	Mm.235387	NM_007758	ENSMUSG00000026616	Cr2	C3DR|CD21|CD35|Cr-1|Cr-2|Cr1	complement receptor 2	protein-coding
chr10-25	chr10	37085093	37085293	+	17.2	0.773	Intergenic	Intergenic	53733	NM_008538	17118	Mm.30059	NM_008538	ENSMUSG00000069662	Marcks	Macs|PKCSL	myristoylated alanine rich protein kinase C substrate	protein-coding
chr13-15	chr13	94382444	94382644	+	17.2	0.831	intron (NM_009680, intron 1 of 26)	intron (NM_009680, intron 1 of 26)	23584	NM_009680	11774	Mm.21185	NM_009680	ENSMUSG00000021686	Ap3b1	AP-3|AU015684|C78395|Hps2|beta3A|pe|pearl|rim2	adaptor-related protein complex 3, beta 1 subunit	protein-coding
chr19-18	chr19	8705838	8706038	+	17.2	0.892	TTS (NM_001161413)	TTS (NM_001161413)	7959	NM_008577	17254	Mm.4114	NM_008577	ENSMUSG00000010095	Slc3a2	4F2|4F2HC|AI314110|Cd98|Ly-10|Ly-m10|Ly10|Mdu1|Mgp-2hc|NACAE	solute carrier family 3 (activators of dibasic and neutral amino acid transport), member 2	protein-coding
chr9-37	chr9	53758212	53758412	+	17.2	0.732	Intergenic	Intergenic	-13223	NM_028060	72022	Mm.26159	NM_028060	ENSMUSG00000042195	Slc35f2	1500009K05Rik|AU019213	solute carrier family 35, member F2	protein-coding
chr6-46	chr6	98574606	98574806	+	16.9	0.661	Intergenic	Intergenic	-231952	NM_001128092	330390	Mm.484161	NM_001128092	ENSMUSG00000090667	Gm765	-	predicted gene 765	protein-coding
chr10-27	chr10	20662631	20662831	+	16.9	0.729	intron (NM_013875, intron 1 of 12)	RLTR28B|LTR|ERVL	62337	NM_013875	29863	Mm.425617	NM_013875	ENSMUSG00000019990	Pde7b	-	phosphodiesterase 7B	protein-coding
chr17-20	chr17	83703308	83703508	+	16.9	0.779	Intergenic	Intergenic	-2755	NM_001171054	116871	Mm.277668	NM_054082	ENSMUSG00000055817	Mta3	1110002J22Rik|mKIAA1266	metastasis associated 3	protein-coding
chr14-12	chr14	121366196	121366396	+	16.9	0.758	intron (NM_145465, intron 1 of 10)	intron (NM_145465, intron 1 of 10)	12934	NM_145465	223255	Mm.390756	NM_145465	ENSMUSG00000063410	Stk24	1810013H02Rik|C76483|MST-3|Mst3|STE20	serine/threonine kinase 24	protein-coding
chr18-21	chr18	14103218	14103418	+	16.9	0.929	Intergenic	B2_Mm1t|SINE|B2	-128988	NR_045373	74529	Mm.400519	NR_045373		8430422H06Rik	-	RIKEN cDNA 8430422H06 gene	ncRNA
chr5-25	chr5	137629600	137629800	+	16.9	0.664	intron (NR_033148, intron 1 of 21)	intron (NR_033148, intron 1 of 21)	577	NR_033148	100316903	Mm.200763	NR_033148		Gm20605	Lrch4-sap25	predicted gene 20605	ncRNA
chr11-97	chr11	54821889	54822089	+	16.7	0.88	intron (NR_040284, intron 2 of 2)	intron (NR_040284, intron 2 of 2)	2070	NR_040284	432562	Mm.406948	NR_040284	ENSMUSG00000086789	Lyrm7os	Gm12228|OTTMUSG00000005674	LYR motif containing 7, opposite strand	ncRNA
chr12-77	chr12	35910833	35911033	+	16.7	0.829	Intergenic	MTC|LTR|ERVL-MaLR	-14688	NM_207531	403205	Mm.190508	NM_207531	ENSMUSG00000036231	Agr3	BCMP11|E030025L21Rik|Gm888	anterior gradient 3	protein-coding
chr4-30	chr4	155775375	155775575	+	16.7	0.791	promoter-TSS (NM_147776)	promoter-TSS (NM_147776)	-914	NM_147776	246228	Mm.26515	NM_147776	ENSMUSG00000042116	Vwa1	4932416A11Rik|WARP	von Willebrand factor A domain containing 1	protein-coding
chr8-28	chr8	27086317	27086517	+	16.7	0.841	intron (NM_054044, intron 1 of 18)	intron (NM_054044, intron 1 of 18)	576	NM_054044	78560	Mm.87046	NM_054044	ENSMUSG00000031486	Adgra2	8430414O08Rik|9530074E10Rik|Gpr124|Tem5|mKIAA1531	adhesion G protein-coupled receptor A2	protein-coding
chr11-64	chr11	69484288	69484488	+	16.7	0.851	intron (NM_001081330, intron 24 of 85)	intron (NM_001081330, intron 24 of 85)	64720	NM_001081330	327954	Mm.247478	NM_177617	ENSMUSG00000005237	Dnah2	2900022L05Rik|4930564A01|D130094J20|D330014H01Rik|Dnahc2|Dnhd3	dynein, axonemal, heavy chain 2	protein-coding
chr2-27	chr2	106091348	106091548	+	16.7	0.725	Intergenic	MT2A|LTR|ERVL	-87899	NR_033993	99349	Mm.25661	NM_026992	ENSMUSG00000027166	Dnajc24	1700030A21Rik|2610027M02Rik|AV066965|AW240712|Dph4|MmDjC7|Zcsl3	DnaJ heat shock protein family (Hsp40) member C24	protein-coding
chr8-35	chr8	122007764	122007964	+	16.4	0.72	intron (NM_001285981, intron 10 of 12)	intron (NM_001285981, intron 10 of 12)	29840	NR_106096	102466915		NR_106096	ENSMUSG00000099140	Mir7237	Gm27482|mmu-mir-7237	microRNA 7237	ncRNA
chr12-76	chr12	103151439	103151639	+	16.4	0.8	intron (NM_001081017, intron 40 of 48)	intron (NM_001081017, intron 40 of 48)	90607	NM_133364	170952	Mm.217019	NM_133364	ENSMUSG00000041669	Prima1	B230212M13Rik|BB120497|PRiMA	proline rich membrane anchor 1	protein-coding
chr10-26	chr10	100520419	100520619	+	16.4	0.679	intron (NM_146009, intron 24 of 52)	intron (NM_146009, intron 24 of 52)	32230	NM_146009	216274	Mm.229114	NM_146009	ENSMUSG00000019971	Cep290	BC004690|Nphp6|b2b1454Clo|b2b1752Clo	centrosomal protein 290	protein-coding
chr9-41	chr9	107629190	107629390	+	16.4	0.772	intron (NM_008138, intron 1 of 8)	CT-rich|Low_complexity|Low_complexity	6052	NM_008138	14678	Mm.196464	NM_008138	ENSMUSG00000032562	Gnai2	C76432|Galphai2|Gia|Gnai-2	guanine nucleotide binding protein (G protein), alpha inhibiting 2	protein-coding
chr16-21	chr16	91271356	91271556	+	16.4	0.814	3' UTR (NM_016968, exon 1 of 1)	3' UTR (NM_016968, exon 1 of 1)	1687	NM_016968	50914	Mm.39300	NM_016968	ENSMUSG00000046160	Olig1	AI836478|AW494459|Bhlhb6|Olg-1|Oligo1|bHLHe21	oligodendrocyte transcription factor 1	protein-coding
chr9-39	chr9	32206290	32206490	+	16.4	0.759	intron (NM_001195632, intron 9 of 21)	intron (NM_001195632, intron 9 of 21)	-17859	NM_177379	330914	Mm.46683	NM_177379	ENSMUSG00000041444	Arhgap32	3426406O18Rik|Gc-gap|Grit|Px-rics|Rics|mKIAA0712|p200Rhogap|p250Gap	Rho GTPase activating protein 32	protein-coding
chr12-126	chr12	35066252	35066452	+	16.4	0.723	intron (NM_001014973, intron 1 of 25)	intron (NM_001014973, intron 1 of 25)	19163	NM_001014973	217463	Mm.213991	NM_001014973	ENSMUSG00000020590	Snx13	Rgs-px1|mKIAA0713	sorting nexin 13	protein-coding
chr3-35	chr3	9878818	9879018	+	16.4	0.895	Intergenic	Intergenic	-45239	NM_001195031	94212	Mm.23897	NM_053182	ENSMUSG00000027508	Pag1	Cbp|F730007C19Rik|Pag	phosphoprotein associated with glycosphingolipid microdomains 1	protein-coding
chr1-56	chr1	74441437	74441637	+	16.4	0.825	exon (NM_176972, exon 24 of 26)	exon (NM_176972, exon 24 of 26)	32153	NM_009509	22349	Mm.471601	NM_009509	ENSMUSG00000026175	Vil1	Vil	villin 1	protein-coding
chr17-26	chr17	17636285	17636485	+	16.4	0.887	Intergenic	MIRc|SINE|MIR	-11896	NM_172827	240028	Mm.328807	NM_172827	ENSMUSG00000023845	Lnpep	2010309L07Rik|4732490P18Rik|CAP|IRAP|PLAP|gp160|vp165	leucyl/cystinyl aminopeptidase	protein-coding
chr6-72	chr6	148946683	148946883	+	16.4	0.844	promoter-TSS (NM_019643)	promoter-TSS (NM_019643)	-351	NM_019643	56306	Mm.18637	NM_019643	ENSMUSG00000039985	Fam60a	Ppcs1|Pptcs1|Tera	family with sequence similarity 60, member A	protein-coding
chr17-35	chr17	13591007	13591207	+	16.4	0.733	Intergenic	Intergenic	-37013	NR_045437	72578	Mm.46549	NR_045436	ENSMUSG00000038347	2700054A10Rik	-	RIKEN cDNA 2700054A10 gene	ncRNA
chr6-76	chr6	123123540	123123740	+	16.2	0.641	exon (NM_001170333, exon 1 of 7)	exon (NM_001170333, exon 1 of 7)	324	NM_001170333	26888	Mm.47384	NM_011999	ENSMUSG00000030148	Clec4a2	Clec4a|Clecsf6|DCIR|Dcir1	C-type lectin domain family 4, member a2	protein-coding
chr11-74	chr11	89028825	89029025	+	16.2	0.824	Intergenic	Intergenic	29522	NM_009546	217069	Mm.248445	NM_009546	ENSMUSG00000000275	Trim25	AA960166|AL022677|EFP|Zfp147	tripartite motif-containing 25	protein-coding
chr4-33	chr4	150098001	150098201	+	16.2	0.755	intron (NM_177366, intron 1 of 3)	B3|SINE|B2	10598	NM_177366	269604	Mm.219307	NM_177366	ENSMUSG00000047875	Gpr157	F730108M23Rik	G protein-coupled receptor 157	protein-coding
chr1-42	chr1	46894555	46894755	+	16.2	0.802	Intergenic	ORR1D2|LTR|ERVL-MaLR	-41146	NM_172653	227059	Mm.233889	NM_172653	ENSMUSG00000025986	Slc39a10	2900042E17Rik|5430433I10|mKIAA1265	solute carrier family 39 (zinc transporter), member 10	protein-coding
chr9-42	chr9	35103556	35103756	+	16.2	0.828	intron (NM_009178, intron 1 of 10)	intron (NM_009178, intron 1 of 10)	-13072	NR_029475	78934	Mm.391688	NR_029475	ENSMUSG00000070315	4930581F22Rik	-	RIKEN cDNA 4930581F22 gene	ncRNA
chr1-48	chr1	134060343	134060543	+	16.2	0.747	Intergenic	Intergenic	18712	NM_007570	12227	Mm.392646	NM_007570	ENSMUSG00000020423	Btg2	AA959598|APRO1|Pc3|TIS21	B cell translocation gene 2, anti-proliferative	protein-coding
chr15-32	chr15	37960312	37960512	+	16.2	0.812	intron (NM_199476, intron 1 of 8)	intron (NM_199476, intron 1 of 8)	643	NM_199476	382985	Mm.24738	NM_199476	ENSMUSG00000022292	Rrm2b	p53R2	ribonucleotide reductase M2 B (TP53 inducible)	protein-coding
chr3-44	chr3	146209808	146210008	+	16.2	0.887	Intergenic	Lx|LINE|L1	-11053	NM_022983	65086	Mm.155520	NM_022983	ENSMUSG00000036832	Lpar3	Edg7|lpA3	lysophosphatidic acid receptor 3	protein-coding
chr1-57	chr1	133012509	133012709	+	16.2	0.722	intron (NM_001302804, intron 3 of 10)	intron (NM_001302804, intron 3 of 10)	12807	NR_126506	17248	Mm.426531	NM_008575	ENSMUSG00000054387	Mdm4	4933417N07Rik|AA414968|AL023055|AU018793|AU021806|C85810|Mdmx	transformed mouse 3T3 cell double minute 4	protein-coding
chr19-22	chr19	24277036	24277236	+	16.2	0.817	intron (NM_008044, intron 2 of 4)	intron (NM_008044, intron 2 of 4)	3450	NM_008044	14297	Mm.7319	NM_008044	ENSMUSG00000059363	Fxn	FA|FARR|Frda|X25	frataxin	protein-coding
chr7-46	chr7	79274219	79274419	+	16.2	0.786	intron (NM_018811, intron 1 of 10)	intron (NM_018811, intron 1 of 10)	1053	NM_018811	54608	Mm.365490	NM_018811	ENSMUSG00000039202	Abhd2	2210009N18Rik|LABH2|Labh-2	abhydrolase domain containing 2	protein-coding
chr10-21	chr10	20381146	20381346	+	16.2	0.711	Intergenic	Intergenic	33427	NM_027930	71804	Mm.262151	NM_027930	ENSMUSG00000019992	Mtfr2	2610016C23Rik|4933412C16Rik|Dufd1|Fam54a	mitochondrial fission regulator 2	protein-coding
chr4-32	chr4	120987392	120987592	+	16.2	0.761	intron (NM_133716, intron 1 of 9)	intron (NM_133716, intron 1 of 9)	-14170	NR_105982	102465614		NR_105982	ENSMUSG00000106436	Mir7015	mmu-mir-7015	microRNA 7015	ncRNA
chr4-48	chr4	128735300	128735500	+	15.9	0.771	intron (NM_001195083, intron 1 of 6)	intron (NM_001195083, intron 1 of 6)	7829	NM_001195083	54383	Mm.473738	NM_018774	ENSMUSG00000028796	Phc2	A3galt2|AA415044|D130050K19Rik|D4Ertd810e|Edr2|Mph2|p36	polyhomeotic-like 2 (Drosophila)	protein-coding
chr10-36	chr10	94828520	94828720	+	15.9	0.779	intron (NM_018797, intron 20 of 30)	intron (NM_018797, intron 20 of 30)	115958	NM_018797	54712	Mm.256712	NM_018797	ENSMUSG00000074785	Plxnc1	2510048K12Rik|AW742158|CD232|Vespr	plexin C1	protein-coding
chr4-35	chr4	14260931	14261131	+	15.9	0.713	intron (NR_131155, intron 2 of 2)	intron (NR_131155, intron 2 of 2)	30278	NR_131155	100040030	Mm.366499	NR_131155		Gm2560	-	predicted gene 2560	ncRNA
chr6-51	chr6	28146472	28146672	+	15.9	0.873	Intergenic	Intergenic	-12203	NM_008174	14823	Mm.320732	NM_008174	ENSMUSG00000024211	Grm8	A230002O04|Gprc1h|mGluR8	glutamate receptor, metabotropic 8	protein-coding
chr7-35	chr7	44035663	44035863	+	15.9	0.788	Intergenic	L1_Mus1|LINE|L1	-16527	NM_020268	16619	Mm.445911	NM_020268	ENSMUSG00000063177	Klk1b27	Gk27|Klk21l|Klk27|mGK-27	kallikrein 1-related peptidase b27	protein-coding
chr14-23	chr14	64769002	64769202	+	15.9	0.78	intron (NM_001081177, intron 29 of 39)	intron (NM_001081177, intron 29 of 39)	116571	NM_001081177	16554	Mm.23611	NM_001081177	ENSMUSG00000060012	Kif13b	5330429L19Rik|6030414C01|AI429803|C130021D12Rik|GAKIN	kinesin family member 13B	protein-coding
chr4-88	chr4	120377091	120377291	+	15.9	0.762	Intergenic	MIRc|SINE|MIR	-28090	NM_001159630	29871	Mm.427014	NM_013883	ENSMUSG00000000085	Scmh1	AI315320|AI851618|Scml1|Scml3	sex comb on midleg homolog 1	protein-coding
chr2-32	chr2	129895481	129895681	+	15.9	0.819	Intergenic	Intergenic	-94122	NR_029452	654409	Mm.305555	NR_029452		4932416H05Rik	-	RIKEN cDNA 4932416H05 gene	ncRNA
chr5-45	chr5	76183601	76183801	+	15.9	0.846	promoter-TSS (NM_011626)	promoter-TSS (NM_011626)	-179	NM_011626	21982	Mm.790	NM_011626	ENSMUSG00000029234	Tmem165	AV026557|Tpardl|Tparl|pFT27	transmembrane protein 165	protein-coding
chr6-52	chr6	52672674	52672874	+	15.9	0.747	Intergenic	MER45B|DNA|hAT-Tip100	-32474	NM_145567	58875	Mm.286458	NM_145567	ENSMUSG00000029776	Hibadh	6430402H10Rik|AI265272	3-hydroxyisobutyrate dehydrogenase	protein-coding
chr1-65	chr1	40404895	40405095	+	15.9	0.759	Intergenic	Intergenic	-24575	NM_001294171	17082	Mm.289824	NM_010743	ENSMUSG00000026069	Il1rl1	DER4|Fit-1|Ly84|ST2L|St2|St2-rs1|T1|T1/ST2	interleukin 1 receptor-like 1	protein-coding
chr7-38	chr7	107702989	107703189	+	15.9	0.653	intron (NM_001163557, intron 6 of 25)	intron (NM_001163557, intron 6 of 25)	54943	NM_001205227	320635	Mm.132828	NM_177216	ENSMUSG00000048065	Cyb5r2	D630003K02Rik|b5R.2	cytochrome b5 reductase 2	protein-coding
chr16-18	chr16	10482068	10482268	+	15.6	0.591	intron (NM_001302618, intron 1 of 18)	intron (NM_001302618, intron 1 of 18)	2096	NM_001302618	12265	Mm.249560	NM_007575	ENSMUSG00000022504	Ciita	C2ta|EG669998|Gm9475|Mhc2ta	class II transactivator	protein-coding
chr4-28	chr4	57300795	57300995	+	15.6	0.696	intron (NM_011207, intron 1 of 25)	intron (NM_011207, intron 1 of 25)	942	NM_011207	545622	Mm.246552	NM_011207	ENSMUSG00000038764	Ptpn3	9530011I20Rik|PTP-H1|PTPCL	protein tyrosine phosphatase, non-receptor type 3	protein-coding
chr16-31	chr16	48868780	48868980	+	15.6	0.75	Intergenic	Intergenic	-3728	NM_181596	245195	Mm.231288	NM_181596	ENSMUSG00000022651	Retnlg	Fizz3|Relmg|Xcp1	resistin like gamma	protein-coding
chr12-111	chr12	105021849	105022049	+	15.6	0.744	Intergenic	Intergenic	9192	NR_037229	100526471		NR_037229	ENSMUSG00000106366	Mir3069	mir-3069|mmu-mir-3069	microRNA 3069	ncRNA
chr1-101	chr1	138931071	138931271	+	15.6	0.701	Intergenic	Intergenic	-32538	NM_001166501	329260	Mm.337604	NM_181347	ENSMUSG00000056268	Dennd1b	4632404N19Rik|4930467M19Rik|6820401H01Rik|F730008N07Rik	DENN/MADD domain containing 1B	protein-coding
chr17-30	chr17	88041814	88042014	+	15.6	0.924	intron (NM_001081034, intron 1 of 22)	intron (NM_001081034, intron 1 of 22)	23371	NM_001081034	225055	Mm.386857	NM_001081034	ENSMUSG00000005371	Fbxo11	C80048|Jf	F-box protein 11	protein-coding
chrX-4	chrX	13599992	13600192	+	15.6	0.759	intron (NM_001284503, intron 10 of 26)	intron (NM_001284503, intron 10 of 26)	-32677	NM_011823	23890	Mm.487326	NM_011823	ENSMUSG00000040229	Gpr34	Lypsr1	G protein-coupled receptor 34	protein-coding
chr11-88	chr11	45856494	45856694	+	15.6	0.901	intron (NM_001045520, intron 1 of 11)	intron (NM_001045520, intron 1 of 11)	4630	NM_001045520	216705	Mm.169673	NM_001045520	ENSMUSG00000006169	Clint1	AI642036|AW537616|C530049I24Rik|Enth|Epn4|F630206G17Rik|mKIAA0171	clathrin interactor 1	protein-coding
chr1-74	chr1	180288427	180288627	+	15.6	0.887	Intergenic	Intergenic	-32227	NM_001128605	19165	Mm.330850	NM_011183	ENSMUSG00000010609	Psen2	ALG-3|Ad4h|Alg3|PS-2|PS2|Psnl2|STM2	presenilin 2	protein-coding
chr6-59	chr6	89299931	89300131	+	15.6	0.77	Intergenic	Intergenic	-14306	NR_131021	75131	Mm.391482	NR_131021	ENSMUSG00000107622	4930512J16Rik	-	RIKEN cDNA 4930512J16 gene	ncRNA
chr13-20	chr13	32868315	32868515	+	15.6	0.667	Intergenic	MTD|LTR|ERVL-MaLR	-17230	NM_025429	66222	Mm.20144	NM_025429	ENSMUSG00000044734	Serpinb1a	1190005M04Rik|AI325983|EI|EIA|ELANH2|LEI|M/NEI|MNEI|PI2	serine (or cysteine) peptidase inhibitor, clade B, member 1a	protein-coding
chr19-25	chr19	25007684	25007884	+	15.6	0.793	intron (NM_028785, intron 1 of 47)	B4A|SINE|B4	8255	NM_028785	76088	Mm.102485	NM_028785	ENSMUSG00000052085	Dock8	1200017A24Rik|5830472H07Rik|A130095G14Rik|AI461977	dedicator of cytokinesis 8	protein-coding
chr18-25	chr18	7283937	7284137	+	15.6	0.827	intron (NM_001081393, intron 7 of 20)	RMER4A|LTR|ERVK	13864	NM_001081393	74934	Mm.107918	NM_001081393	ENSMUSG00000061802	Armc4	4930463I21Rik|b2b227.1Clo|b2b643Clo	armadillo repeat containing 4	protein-coding
chr11-87	chr11	70466775	70466975	+	15.6	0.815	TTS (NM_001029929)	TTS (NM_001029929)	-6891	NM_023158	66102	Mm.425692	NM_023158	ENSMUSG00000018920	Cxcl16	0910001K24Rik|AV290116|BB024863|CXCL16v1|CXCL16v2|SR-PSOX|Zmynd15|b2b498Clo	chemokine (C-X-C motif) ligand 16	protein-coding
chr6-39	chr6	108403806	108404006	+	15.6	0.765	intron (NM_010585, intron 33 of 61)	intron (NM_010585, intron 33 of 61)	-85837	NR_106121	102465766		NR_106121	ENSMUSG00000105697	Mir7661	mmu-mir-7661	microRNA 7661	ncRNA
chr19-34	chr19	41177035	41177235	+	15.6	0.75	intron (NM_011904, intron 2 of 20)	intron (NM_011904, intron 2 of 20)	29639	NM_011904	24087	Mm.89983	NM_011904	ENSMUSG00000025013	Tll2	-	tolloid-like 2	protein-coding
chr1-62	chr1	116421102	116421302	+	15.6	0.7	intron (NM_001077425, intron 14 of 23)	Lx|LINE|L1	736065	NM_001077425	636808	Mm.101576	NM_001077425	ENSMUSG00000070695	Cntnap5a	Caspr5-1|EG636808	contactin associated protein-like 5A	protein-coding
chr11-68	chr11	115813837	115814037	+	15.6	0.779	promoter-TSS (NM_029557)	promoter-TSS (NM_029557)	-345	NM_080643	140721	Mm.383737	NM_080643	ENSMUSG00000034471	Caskin2	1600028L06Rik|mKIAA1139	CASK-interacting protein 2	protein-coding
chr11-65	chr11	75169314	75169514	+	15.6	0.789	exon (NM_010430, exon 1 of 2)	exon (NM_010430, exon 1 of 2)	841	NM_010430	15248	Mm.57250	NM_010430	ENSMUSG00000043099	Hic1	AA408311|HIC-1	hypermethylated in cancer 1	protein-coding
chr8-54	chr8	84861299	84861499	+	15.4	0.756	exon (NM_025648, exon 4 of 13)	exon (NM_025648, exon 4 of 13)	4413	NM_025648	66590	Mm.292517	NM_025648	ENSMUSG00000003808	Farsa	0610012A19Rik|Farsla	phenylalanyl-tRNA synthetase, alpha subunit	protein-coding
chr3-30	chr3	129333178	129333378	+	15.4	0.861	promoter-TSS (NM_007934)	promoter-TSS (NM_007934)	-529	NM_007934	13809	Mm.1193	NM_007934	ENSMUSG00000028024	Enpep	6030431M22Rik|APA|Bp-1/6C3|Ly-51|Ly51	glutamyl aminopeptidase	protein-coding
chr13-48	chr13	49055469	49055669	+	15.4	0.759	intron (NM_001290311, intron 23 of 28)	intron (NM_001290311, intron 23 of 28)	87457	NR_015601	68128	Mm.426304	NR_015601		Fam120aos	C030044B11Rik	family with sequence similarity 120A, opposite strand	ncRNA
chr9-38	chr9	70013856	70014056	+	15.4	0.875	intron (NM_001282083, intron 1 of 4)	L2a|LINE|L2	1408	NM_001282083	235459	Mm.293117	NM_199151	ENSMUSG00000033543	Gtf2a2	TFIIA-gamma|TfIIg|Tfiia2	general transcription factor II A, 2	protein-coding
chr2-28	chr2	52537688	52537888	+	15.4	0.737	intron (NM_001285426, intron 2 of 13)	intron (NM_001285426, intron 2 of 13)	20823	NM_146123	12298	Mm.330223	NM_146123	ENSMUSG00000017412	Cacnb4	3110038O15Rik|Cchb4|lh	calcium channel, voltage-dependent, beta 4 subunit	protein-coding
chr9-50	chr9	73044561	73044761	+	15.4	0.838	promoter-TSS (NM_001301230)	promoter-TSS (NM_001301230)	-149	NM_023635	11891	Mm.34867	NM_023635	ENSMUSG00000032202	Rab27a	2210402C08Rik|2410003M20Rik|4933437C11Rik|ash	RAB27A, member RAS oncogene family	protein-coding
chr4-44	chr4	19725525	19725725	+	15.4	0.75	Intergenic	MamTip2|DNA|hAT-Tip100	-16621	NR_074090	107568	Mm.78312	NM_177327	ENSMUSG00000041058	Wwp1	8030445B08Rik|AIP5|SDRP1|Tiul1	WW domain containing E3 ubiquitin protein ligase 1	protein-coding
chr4-40	chr4	145314047	145314247	+	15.4	0.914	intron (NM_009401, intron 1 of 12)	intron (NM_009401, intron 1 of 12)	1000	NM_009401	21941	Mm.12810	NM_009401	ENSMUSG00000028602	Tnfrsf8	Cd30|D1S166E|Ki|Ki-1	tumor necrosis factor receptor superfamily, member 8	protein-coding
chr19-32	chr19	41405746	41405946	+	15.4	0.814	Intergenic	L1_Mus1|LINE|L1	-20776	NM_031376	83490	Mm.222266	NM_031376	ENSMUSG00000025017	Pik3ap1	1810044J04Rik|BCAP	phosphoinositide-3-kinase adaptor protein 1	protein-coding
chr12-113	chr12	111669768	111669968	+	15.4	0.697	exon (NM_021273, exon 7 of 8)	exon (NM_021273, exon 7 of 8)	2470	NM_021273	12709	Mm.16831	NM_021273	ENSMUSG00000001270	Ckb	B-CK|Bck|Ck-3|Ck3|Ckbb	creatine kinase, brain	protein-coding
chr1-49	chr1	136345100	136345300	+	15.4	0.841	intron (NM_001081360, intron 1 of 18)	intron (NM_001081360, intron 1 of 18)	904	NM_001081360	67886	Mm.144143	NM_001081360	ENSMUSG00000041570	Camsap2	1600013L13Rik|4930541M15Rik|Camsap1l1|mKIAA1078	calmodulin regulated spectrin-associated protein family, member 2	protein-coding
chr11-126	chr11	101155644	101155844	+	15.4	0.866	promoter-TSS (NM_134028)	promoter-TSS (NM_134028)	-140	NM_134028	103768	Mm.142348	NM_134028	ENSMUSG00000045007	Tubg2	AI504772|Tubgl	tubulin, gamma 2	protein-coding
chr12-102	chr12	40083219	40083419	+	15.4	0.702	intron (NM_009132, intron 5 of 13)	intron (NM_009132, intron 5 of 13)	-45332	NM_001039515	11861	Mm.12723	NM_007487	ENSMUSG00000047446	Arl4a	AI467555|Arl4	ADP-ribosylation factor-like 4A	protein-coding
chr12-119	chr12	71184526	71184726	+	15.4	0.803	intron (NM_001163378, intron 21 of 29)	intron (NM_001163378, intron 21 of 29)	47778	NM_001163378	76967	Mm.87290	NM_029818	ENSMUSG00000034601	2700049A03Rik	Ta3|Talpid3|mKIAA0586	RIKEN cDNA 2700049A03 gene	protein-coding
chr2-43	chr2	158070779	158070979	+	15.4	0.821	intron (NM_001291135, intron 7 of 7)	intron (NM_001291135, intron 7 of 7)	20918	NR_040609	72340	Mm.443395	NR_040609	ENSMUSG00000100860	2010009K17Rik	-	RIKEN cDNA 2010009K17 gene	ncRNA
chr5-73	chr5	15463074	15463274	+	15.4	0.849	Intergenic	Lx5c|LINE|L1	66048	NM_001310449	100861755	Mm.382859	NM_001310449	ENSMUSG00000106445	Gm21190	-	predicted gene, 21190	protein-coding
chr15-30	chr15	94603610	94603810	+	15.1	0.753	Intergenic	Intergenic	-13886	NM_008971	19230	Mm.490250	NM_008971	ENSMUSG00000022451	Twf1	A6|Ptk9|twinfilin	twinfilin actin binding protein 1	protein-coding
chr16-34	chr16	8900403	8900603	+	15.1	0.883	Intergenic	Intergenic	70403	NM_001081400	69053	Mm.390868	NM_001081400	ENSMUSG00000022507	1810013L24Rik	1110017P05Rik|3010002C02Rik|AA792997|AW124177|Gm19906|R74903	RIKEN cDNA 1810013L24 gene	protein-coding
chr1-35	chr1	43472260	43472460	+	15.1	0.775	intron (NM_010879, intron 1 of 4)	intron (NM_010879, intron 1 of 4)	26609	NM_010879	17974	Mm.389903	NM_010879	ENSMUSG00000066877	Nck2	4833426I10Rik|Grb4|NCKbeta|Nck-2	non-catalytic region of tyrosine kinase adaptor protein 2	protein-coding
chr12-93	chr12	113045442	113045642	+	15.1	0.767	exon (NM_001081170, exon 3 of 24)	exon (NM_001081170, exon 3 of 24)	-28960	NM_029381	75671	Mm.23377	NM_029381	ENSMUSG00000012211	Tex22	1700028O09Rik|AV210422|Tep22	testis expressed gene 22	protein-coding
chr2-57	chr2	33014178	33014378	+	15.1	0.681	intron (NM_178888, intron 17 of 28)	intron (NM_178888, intron 17 of 28)	-32222	NM_019488	56017	Mm.305754	NM_019488	ENSMUSG00000026791	Slc2a8	D2Ertd44e|GLUT8|GlutX1	solute carrier family 2, (facilitated glucose transporter), member 8	protein-coding
chr6-65	chr6	37601082	37601282	+	15.1	0.811	Intergenic	Intergenic	71009	NM_145364	208665	Mm.262635	NM_145364	ENSMUSG00000038641	Akr1d1	-	aldo-keto reductase family 1, member D1	protein-coding
chr6-45	chr6	30240209	30240409	+	15.1	0.711	intron (NM_001169576, intron 3 of 4)	intron (NM_001169576, intron 3 of 4)	3494	NM_001169577	22214	Mm.332967	NM_009459	ENSMUSG00000039159	Ube2h	1500009C23Rik|AI181839|AI326965|AI462483|AW227540|E2-20K|Gid3|N28148|Ubc8	ubiquitin-conjugating enzyme E2H	protein-coding
chr16-29	chr16	13109200	13109400	+	15.1	0.763	promoter-TSS (NM_015769)	promoter-TSS (NM_015769)	-436	NM_015769	50505	Mm.287837	NM_015769	ENSMUSG00000022545	Ercc4	AI606920|Xpf	excision repair cross-complementing rodent repair deficiency, complementation group 4	protein-coding
chr6-119	chr6	82939802	82940002	+	15.1	0.875	promoter-TSS (NM_011350)	promoter-TSS (NM_011350)	-133	NM_011350	20355	Mm.270543	NM_011350	ENSMUSG00000000627	Sema4f	Sema W	sema domain, immunoglobulin domain (Ig), TM domain, and short cytoplasmic domain	protein-coding
chr10-15	chr10	78148123	78148323	+	15.1	0.722	Intergenic	Intergenic	21545	NM_138601	28295	Mm.268691	NM_138601	ENSMUSG00000053329	D10Jhu81e	C21orf33|ES1	DNA segment, Chr 10, Johns Hopkins University 81 expressed	protein-coding
chr12-90	chr12	59162882	59163082	+	15.1	0.649	exon (NM_146034, exon 14 of 25)	exon (NM_146034, exon 14 of 25)	31529	NM_001165253	338320	Mm.213215	NM_146034	ENSMUSG00000021000	Mia2	Ctage5|D12Bwg0579e|Mea6|Mgea|Mgea6	melanoma inhibitory activity 2	protein-coding
chr2-38	chr2	120083981	120084181	+	15.1	0.765	Intergenic	L2a|LINE|L2	50648	NM_145378	211429	Mm.41467	NM_145378	ENSMUSG00000098488	Pla2g4b	A030011C02Rik|Gm1013|cPLA2-beta	phospholipase A2, group IVB (cytosolic)	protein-coding
chr17-34	chr17	25631775	25631975	+	15.1	0.699	intron (NR_045520, intron 3 of 8)	intron (NR_045520, intron 3 of 8)	52701	NR_045520	76483	Mm.12787	NM_029624	ENSMUSG00000002279	Lmf1	2400010G15Rik|AW822050|Tmem112|cld	lipase maturation factor 1	protein-coding
chr6-67	chr6	127351604	127351804	+	15.1	0.782	Intergenic	MTB|LTR|ERVL-MaLR	-43737	NR_073373	232386	Mm.257367	NR_073373	ENSMUSG00000107153	Gm38404	D130058E03	predicted gene, 38404	ncRNA
chr9-47	chr9	94668597	94668797	+	15.1	0.618	Intergenic	Intergenic	-1195	NM_177909	331004	Mm.326125	NM_177909	ENSMUSG00000031129	Slc9a9	5730527A11Rik|9930105B05|AI854429|Nhe9	solute carrier family 9 (sodium/hydrogen exchanger), member 9	protein-coding
chr3-21	chr3	93798957	93799157	+	15.1	0.688	Intergenic	ORR1B1|LTR|ERVL-MaLR	2659	NM_207272	399675	Mm.377924	NM_207272	ENSMUSG00000060256	Tdpoz4	-	TD and POZ domain containing 4	protein-coding
chr6-93	chr6	67165287	67165487	+	15.1	0.891	Intergenic	Intergenic	-101592	NM_001113564	66870	Mm.240490	NM_025814	ENSMUSG00000036371	Serbp1	1200009K13Rik|9330147J08Rik|AL022786|Pairbp1	serpine1 mRNA binding protein 1	protein-coding
chr12-75	chr12	95802269	95802469	+	15.1	0.925	Intergenic	L1Md_T|LINE|L1	110143	NM_201518	399558	Mm.341948	NM_201518	ENSMUSG00000047414	Flrt2	-	fibronectin leucine rich transmembrane protein 2	protein-coding
chr2-82	chr2	18988841	18989041	+	15.1	0.899	intron (NM_008845, intron 1 of 9)	intron (NM_008845, intron 1 of 9)	9180	NM_008845	18718	Mm.313977	NM_008845	ENSMUSG00000026737	Pip4k2a	AW742916|Pip5k2a	phosphatidylinositol-5-phosphate 4-kinase, type II, alpha	protein-coding
chr3-33	chr3	30876289	30876489	+	15.1	0.744	intron (NM_001286994, intron 1 of 3)	Lx9|LINE|L1	20439	NM_001286994	71862	Mm.272019	NM_027965	ENSMUSG00000037661	Gpr160	1700025D19Rik|GPCR150	G protein-coupled receptor 160	protein-coding
chr13-45	chr13	119809045	119809245	+	15.1	0.906	Intergenic	Lx9|LINE|L1	-18023	NM_001302550	72465	Mm.139115	NM_028245	ENSMUSG00000094870	Zfp131	2610109I01Rik|AW558871|Znf131	zinc finger protein 131	protein-coding
chr2-51	chr2	118729835	118730035	+	14.9	0.723	Intergenic	Intergenic	-1497	NM_001290790	18796	Mm.215156	NM_177568	ENSMUSG00000040061	Plcb2	AI550384|B230205M18Rik|B230399N12	phospholipase C, beta 2	protein-coding
chr18-23	chr18	32954020	32954220	+	14.9	0.806	intron (NM_009793, intron 1 of 10)	intron (NM_009793, intron 1 of 10)	15079	NM_009793	12326	Mm.222329	NM_009793	ENSMUSG00000038128	Camk4	A430110E23Rik|AI666733|CaMKIV|CaMKIV/Gr|D18Bwg0362e	calcium/calmodulin-dependent protein kinase IV	protein-coding
chr7-37	chr7	35393001	35393201	+	14.9	0.908	TTS (NM_027897)	TTS (NM_027897)	3666	NM_178643	101831	Mm.389855	NM_178643	ENSMUSG00000030493	Faap24	AW124591|AW538696|C230052I12Rik	Fanconi anemia core complex associated protein 24	protein-coding
chr10-60	chr10	8378892	8379092	+	14.9	0.922	intron (NM_177387, intron 2 of 7)	L1Md_F2|LINE|L1	139833	NM_177387	338362	Mm.41163	NM_177387	ENSMUSG00000047712	Ust	D930010O20Rik|UA2OST	uronyl-2-sulfotransferase	protein-coding
chr11-78	chr11	115823714	115823914	+	14.9	0.819	promoter-TSS (NM_001252532)	promoter-TSS (NM_001252532)	-244	NM_145438	217325	Mm.290450	NM_145438	ENSMUSG00000020782	Llgl2	9130006H11Rik|Llglh2	lethal giant larvae homolog 2 (Drosophila)	protein-coding
chr6-64	chr6	33051747	33051947	+	14.9	0.628	intron (NM_025336, intron 1 of 7)	intron (NM_025336, intron 1 of 7)	8305	NM_025336	66075	Mm.21501	NM_025336	ENSMUSG00000053768	Chchd3	0610041L09Rik|1700039J09Rik|AW558177	coiled-coil-helix-coiled-coil-helix domain containing 3	protein-coding
chr5-86	chr5	92914235	92914435	+	14.9	0.811	intron (NM_001077596, intron 1 of 9)	intron (NM_001077596, intron 1 of 9)	16342	NM_001077596	27428	Mm.46014	NM_015756	ENSMUSG00000029381	Shroom3	AL022960|D5Ertd287e|Shrm|Shrm3	shroom family member 3	protein-coding
chr9-105	chr9	41158149	41158349	+	14.9	0.808	promoter-TSS (NM_176860)	promoter-TSS (NM_176860)	-755	NM_176860	72828	Mm.133615	NM_176860	ENSMUSG00000032020	Ubash3b	2810457I06Rik|BB125008|TULA-2|p70	ubiquitin associated and SH3 domain containing, B	protein-coding
chr6-85	chr6	70825024	70825224	+	14.9	0.765	Intergenic	Intergenic	-19391	NM_010121	13666	Mm.247167	NM_010121	ENSMUSG00000031668	Eif2ak3	Pek|Perk	eukaryotic translation initiation factor 2 alpha kinase 3	protein-coding
chr15-25	chr15	77846320	77846520	+	14.9	0.817	Intergenic	Intergenic	-4245	NM_022410	17886	Mm.29677	NM_022410	ENSMUSG00000022443	Myh9	Fltn|Myhn-1|Myhn1|NMHCIIA|NMMHC-A|NMMHC-IIA|TU72.6	myosin, heavy polypeptide 9, non-muscle	protein-coding
chr11-84	chr11	76406993	76407193	+	14.9	0.805	promoter-TSS (NM_023355)	promoter-TSS (NM_023355)	-50	NM_023355	56322	Mm.18803	NM_019818	ENSMUSG00000020843	Timm22	Tim22	translocase of inner mitochondrial membrane 22	protein-coding
chr4-39	chr4	98550849	98551049	+	14.9	0.771	intron (NM_007704, intron 1 of 17)	intron (NM_007704, intron 1 of 17)	4315	NM_001005787	12695	Mm.90218	NM_007704	ENSMUSG00000061859	Patj	Cipp|Inadl	PATJ, crumbs cell polarity complex component	protein-coding
chr11-107	chr11	116778969	116779169	+	14.9	0.866	Intergenic	Intergenic	-3562	NM_011371	20445	Mm.436887	NM_011371	ENSMUSG00000009588	St6galnac1	Siat7a	ST6 (alpha-N-acetyl-neuraminyl-2,3-beta-galactosyl-1,3)-N-acetylgalactosaminide alpha-2,6-sialyltransferase 1	protein-coding
chr6-105	chr6	114648624	114648824	+	14.9	0.831	intron (NM_001253718, intron 2 of 19)	RSINE1|SINE|B4	5627	NM_001253717	74244	Mm.275332	NM_028835	ENSMUSG00000030314	Atg7	1810013K23Rik|Agp7|Apg7l|Atg7l|Gm21553	autophagy related 7	protein-coding
chr14-34	chr14	121575202	121575402	+	14.9	0.879	intron (NM_134074, intron 45 of 52)	(CA)n|Simple_repeat|Simple_repeat	-70048	NM_053079	56643	Mm.155618	NM_053079	ENSMUSG00000025557	Slc15a1	D630032F02|PECT1|PEPT1	solute carrier family 15 (oligopeptide transporter), member 1	protein-coding
chr17-29	chr17	31834195	31834395	+	14.9	0.651	Intergenic	Intergenic	21497	NM_010831	17691	Mm.290941	NM_010831	ENSMUSG00000024042	Sik1	Msk|Sik|Snf1lk	salt inducible kinase 1	protein-coding
chr9-61	chr9	25294303	25294503	+	14.9	0.813	intron (NM_001205367, intron 6 of 12)	CT-rich|Low_complexity|Low_complexity	41964	NM_001205367	235072	Mm.270259	NM_009859	ENSMUSG00000001833	2007-09-01	Cdc10|E430034N22	septin 7	protein-coding
chr15-31	chr15	34775711	34775911	+	14.9	0.853	Intergenic	RLTR19-int|LTR|ERVK	-61544	NM_181317	16539	Mm.71045	NM_181317	ENSMUSG00000050963	Kcns2	E130006J24Rik|Kv9.2	K+ voltage-gated channel, subfamily S, 2	protein-coding
chr6-69	chr6	128527295	128527495	+	14.9	0.842	promoter-TSS (NM_007376)	promoter-TSS (NM_007376)	-675	NM_007376	11287	Mm.260144	NM_007376	ENSMUSG00000030359	Pzp	A1m|A2m|AI893533|MAM	pregnancy zone protein	protein-coding
chr4-42	chr4	56515624	56515824	+	14.9	0.864	Intergenic	ORR1C1|LTR|ERVL-MaLR	225701	NM_025271	11471	Mm.251434	NM_025271	ENSMUSG00000070980	Actl7b	Tact1	actin-like 7b	protein-coding
chr5-55	chr5	110448821	110449021	+	14.9	0.787	promoter-TSS (NM_001142642)	promoter-TSS (NM_001142642)	-418	NM_001142642	381668	Mm.348782	NM_028596	ENSMUSG00000043323	Fbrsl1	2410025L10Rik|AI467568|Gm1049|Gm29766|mKIAA1545	fibrosin-like 1	protein-coding
chr2-69	chr2	144599778	144599978	+	14.9	0.846	promoter-TSS (NM_025314)	promoter-TSS (NM_025314)	-75	NM_025314	66044	Mm.28109	NM_025314	ENSMUSG00000027430	Dtd1	0610006H08Rik|DUE-B|Hars2	D-tyrosyl-tRNA deacylase 1	protein-coding
chr16-41	chr16	52346627	52346827	+	14.9	0.912	intron (NM_009655, intron 1 of 15)	intron (NM_009655, intron 1 of 15)	106270	NM_009655	11658	Mm.288282	NM_009655	ENSMUSG00000022636	Alcam	AI853494|BEN|CD166|DM-GRASP|MuSC|SC1	activated leukocyte cell adhesion molecule	protein-coding
chr4-99	chr4	83339342	83339542	+	14.6	0.857	Intergenic	Intergenic	-15253	NM_027238	69863	Mm.5540	NM_025782	ENSMUSG00000038172	Ttc39b	1810054D07Rik|9130422G05Rik|AI450603|AV103077|AW215585	tetratricopeptide repeat domain 39B	protein-coding
chr8-43	chr8	120535413	120535613	+	14.6	0.705	promoter-TSS (NM_001145897)	promoter-TSS (NM_001145897)	-344	NM_001145897	382034	Mm.334856	NM_198671	ENSMUSG00000031822	Gse1	2210013I18Rik|mKIAA0182	genetic suppressor element 1, coiled-coil protein	protein-coding
chr10-34	chr10	53366447	53366647	+	14.6	0.766	intron (NM_001204983, intron 1 of 12)	intron (NM_001204983, intron 1 of 12)	13304	NM_001204983	100038725	Mm.441403	NM_001204983	ENSMUSG00000038594	Cep85l	ENSMUSG00000038594|Gm9766	centrosomal protein 85-like	protein-coding
chr10-54	chr10	59225234	59225434	+	14.6	0.678	3' UTR (NM_172939, exon 1 of 1)	3' UTR (NM_172939, exon 1 of 1)	3412	NM_172939	268301	Mm.3036	NM_172939	ENSMUSG00000098188	Sowahc	4921515A04Rik|9430099J10Rik|Ankrd57|C820004L04Rik	sosondowah ankyrin repeat domain family member C	protein-coding
chr2-39	chr2	57238547	57238747	+	14.6	0.685	intron (NM_010274, intron 1 of 16)	intron (NM_010274, intron 1 of 16)	265	NM_010274	14571	Mm.3711	NM_010274	ENSMUSG00000026827	Gpd2	AA408484|AI448216|AU021455|AW494132|GPDH|Gdm1|Gpd-m|Gpdh-m|TISP38	glycerol phosphate dehydrogenase 2, mitochondrial	protein-coding
chr3-40	chr3	27197819	27198019	+	14.6	0.732	intron (NM_178772, intron 1 of 4)	intron (NM_178772, intron 1 of 4)	14915	NM_178772	320024	Mm.24576	NM_178772	ENSMUSG00000027698	Nceh1	Aadacl1|B230106I24Rik|CPO-BP|Nceh	neutral cholesterol ester hydrolase 1	protein-coding
chr14-93	chr14	45661481	45661681	+	14.6	0.803	Intergenic	Intergenic	-3438	NM_001042719	114874	Mm.121918	NM_176845	ENSMUSG00000037697	Ddhd1	Mir5131|PA-PLA1	DDHD domain containing 1	protein-coding
chr15-42	chr15	102238635	102238835	+	14.6	0.724	intron (NM_001042727, intron 7 of 7)	intron (NM_001042727, intron 7 of 7)	-6800	NM_013566	16421	Mm.58	NM_013566	ENSMUSG00000001281	Itgb7	Ly69	integrin beta 7	protein-coding
chr4-103	chr4	155171421	155171621	+	14.6	0.877	intron (NM_011385, intron 1 of 6)	intron (NM_011385, intron 1 of 6)	51014	NM_011385	20481	Mm.28520	NM_011385	ENSMUSG00000029050	Ski	2310012I02Rik|2610001A11Rik|AA062172|AA589460|BC004088	ski sarcoma viral oncogene homolog (avian)	protein-coding
chr12-194	chr12	119369717	119369917	+	14.6	0.684	Intergenic	BGLII|LTR|ERVK	-73593	NM_001163136	238455	Mm.31376	NM_001163136	ENSMUSG00000041886	Macc1	4732474O15Rik|Gm267	metastasis associated in colon cancer 1	protein-coding
chr6-77	chr6	133160998	133161198	+	14.6	0.738	Intergenic	Lx9|LINE|L1	55859	NR_073368	381820	Mm.291762	NM_001163445	ENSMUSG00000072704	Smim10l1	2700089E24Rik|AI662692	small integral membrane protein 10 like 1	protein-coding
chr1-111	chr1	171646738	171646938	+	14.6	0.769	intron (NM_144539, intron 2 of 7)	intron (NM_144539, intron 2 of 7)	-4938	NR_106151	102465784		NR_106151	ENSMUSG00000098316	Mir7683	Gm27950|mmu-mir-7683	microRNA 7683	ncRNA
chr4-68	chr4	134551192	134551392	+	14.6	0.716	intron (NM_029100, intron 2 of 11)	intron (NM_029100, intron 2 of 11)	874	NM_029100	74777	Mm.29773	NM_029100	ENSMUSG00000050989	Selenon	1110019I12Rik|AI414492|SelN|Sepn1	selenoprotein N	protein-coding
chr14-42	chr14	70112196	70112396	+	14.6	0.789	intron (NM_021328, intron 1 of 8)	Arthur1|DNA|hAT-Tip100	12151	NM_021328	57784	Mm.24186	NM_021328	ENSMUSG00000022089	Bin3	1700015F07Rik	bridging integrator 3	protein-coding
chr18-29	chr18	82981436	82981636	+	14.6	0.685	intron (NM_001177464, intron 2 of 5)	intron (NM_001177464, intron 2 of 5)	-60976	NR_033307	75853	Mm.420737	NR_033307		4930592I03Rik	-	RIKEN cDNA 4930592I03 gene	ncRNA
chr8-56	chr8	103881823	103882023	+	14.6	0.729	Intergenic	MIR|SINE|MIR	-219702	NM_009868	12562	Mm.21767	NM_009868	ENSMUSG00000031871	Cdh5	7B4|AA408225|Cd144|VE-Cad|VECD|VEcad|Vec	cadherin 5	protein-coding
chr19-29	chr19	3935895	3936095	+	14.6	0.744	intron (NM_019449, intron 2 of 10)	intron (NM_019449, intron 2 of 10)	809	NM_001161428	54445	Mm.262094	NM_019449	ENSMUSG00000036908	Unc93b1	Unc-93B1|Unc93b	unc-93 homolog B1 (C. elegans)	protein-coding
chr12-275	chr12	79725065	79725265	+	14.6	0.663	intron (NM_009014, intron 8 of 10)	intron (NM_009014, intron 8 of 10)	199568	NR_131075	77290	Mm.395042	NR_131073		9430078K24Rik	-	RIKEN cDNA 9430078K24 gene	ncRNA
chr8-73	chr8	25245684	25245884	+	14.6	0.747	Intergenic	Intergenic	-44242	NM_177089	320165	Mm.308452	NM_177089	ENSMUSG00000065954	Tacc1	4833447E04Rik|AA960202|B230378H13Rik	transforming, acidic coiled-coil containing protein 1	protein-coding
chr13-34	chr13	3520139	3520339	+	14.6	0.952	Intergenic	Intergenic	-17836	NM_008112	14569	Mm.153226	NM_008112	ENSMUSG00000021218	Gdi2	GDI-B|GDIB|Gdi3	guanosine diphosphate (GDP) dissociation inhibitor 2	protein-coding
chr19-28	chr19	47035213	47035413	+	14.6	0.77	intron (NR_133574, intron 9 of 9)	intron (NR_133574, intron 9 of 9)	15593	NM_027654	71041	Mm.35413	NM_027654	ENSMUSG00000025050	Pcgf6	4933407A11Rik|AI604840|MBLR|Rnf134	polycomb group ring finger 6	protein-coding
chr4-59	chr4	48098264	48098464	+	14.6	0.919	Intergenic	PB1D10|SINE|Alu	-26555	NM_026343	67727	Mm.171334	NM_026343	ENSMUSG00000061455	Stx17	4833418L03Rik|6330411F21Rik|9030425C21Rik|AW048351	syntaxin 17	protein-coding
chr3-42	chr3	89431118	89431318	+	14.6	0.761	intron (NM_001293763, intron 2 of 2)	intron (NM_001293763, intron 2 of 2)	198	NM_001293766	68911	Mm.22521	NM_026869	ENSMUSG00000047824	Pygo2	1190004M21Rik	pygopus 2	protein-coding
chr19-35	chr19	59074548	59074748	+	14.3	0.686	intron (NM_175172, intron 1 of 14)	intron (NM_175172, intron 1 of 14)	1421	NM_175172	71653	Mm.37338	NM_175172	ENSMUSG00000041362	Shtn1	4930506M07Rik|Kiaa1598|Shootin1|mKIAA1598	shootin 1	protein-coding
chr15-28	chr15	27356847	27357047	+	14.3	0.722	Intergenic	Intergenic	-109730	NM_020332	11732	Mm.265264	NM_020332	ENSMUSG00000022265	Ank	Ankh|D15Ertd221e|ank|mKIAA1581	progressive ankylosis	protein-coding
chr19-46	chr19	58966459	58966659	+	14.3	0.64	intron (NM_178689, intron 11 of 13)	intron (NM_178689, intron 11 of 13)	23134	NM_178689	226265	Mm.103154	NM_178689	ENSMUSG00000048029	Eno4	6430537H07Rik	enolase 4	protein-coding
chr11-92	chr11	71855378	71855578	+	14.3	0.689	Intergenic	Intergenic	84644	NR_045942	73816	Mm.390391	NR_045942	ENSMUSG00000085528	4930401O10Rik	-	RIKEN cDNA 4930401O10 gene	ncRNA
chr11-120	chr11	111312300	111312500	+	14.3	0.829	Intergenic	Intergenic	246236	NM_008425	16518	Mm.4951	NM_008425	ENSMUSG00000041695	Kcnj2	IRK1|Kcnf1|Kir2.1	potassium inwardly-rectifying channel, subfamily J, member 2	protein-coding
chr16-39	chr16	45148864	45149064	+	14.3	0.651	intron (NM_028756, intron 4 of 6)	intron (NM_028756, intron 4 of 6)	9709	NM_028756	74102	Mm.264984	NM_028756	ENSMUSG00000022664	Slc35a5	1010001J06Rik|AU021179|BB097433|D16Ertd450e|D730043G07Rik	solute carrier family 35, member A5	protein-coding
chr6-115	chr6	14048472	14048672	+	14.3	0.746	Intergenic	Lx7|LINE|L1	177003	NR_045995	76311	Mm.367129	NR_045995	ENSMUSG00000097616	1110019D14Rik	-	RIKEN cDNA 1110019D14 gene	ncRNA
chr16-28	chr16	92535299	92535499	+	14.3	0.738	intron (NM_172469, intron 5 of 5)	intron (NM_172469, intron 5 of 5)	37252	NM_172469	209195	Mm.44747	NM_172469	ENSMUSG00000022949	Clic6	5730466J16Rik|AL022908|AW045520|CLIC1L	chloride intracellular channel 6	protein-coding
chr14-25	chr14	50785396	50785596	+	14.3	0.846	promoter-TSS (NM_177625)	promoter-TSS (NM_177625)	24	NM_177625	219022	Mm.276362	NM_177625	ENSMUSG00000006288	Ttc5	-	tetratricopeptide repeat domain 5	protein-coding
chr6-74	chr6	86577518	86577718	+	14.3	0.729	Intergenic	Intergenic	50217	NR_037961	72012	Mm.349174	NR_037960	ENSMUSG00000097048	1600020E01Rik	-	RIKEN cDNA 1600020E01 gene	ncRNA
chr5-32	chr5	15006660	15006860	+	14.3	0.76	Intergenic	Intergenic	26247	NM_182957	66773	Mm.368256	NM_182957	ENSMUSG00000091897	Gm17019	-	predicted gene 17019	protein-coding
chr4-70	chr4	140857051	140857251	+	14.3	0.747	Intergenic	Intergenic	-11373	NM_011059	18599	Mm.20854	NM_011059	ENSMUSG00000025329	Padi1	AV236283|Pdi1	peptidyl arginine deiminase, type I	protein-coding
chr10-41	chr10	127879752	127879952	+	14.3	0.849	Intergenic	Intergenic	8847	NM_017473	54150	Mm.6696	NM_017473	ENSMUSG00000040134	Rdh7	AI194929|CRAD2	retinol dehydrogenase 7	protein-coding
chr2-70	chr2	145750010	145750210	+	14.3	0.734	intron (NR_033220, intron 3 of 3)	intron (NR_033220, intron 3 of 3)	-36006	NM_028724	74030	Mm.228799	NM_028724	ENSMUSG00000001768	Rin2	2010003K16Rik|4632403N06Rik|AW821980|RASSF4	Ras and Rab interactor 2	protein-coding
chr8-31	chr8	124410038	124410238	+	14.3	0.592	intron (NM_171824, intron 1 of 6)	intron (NM_171824, intron 1 of 6)	23798	NM_171824	209966	Mm.234233	NM_171824	ENSMUSG00000050751	Pgbd5	2900019M05Rik|AI854313	piggyBac transposable element derived 5	protein-coding
chr11-111	chr11	71270978	71271178	+	14.3	0.753	intron (NR_027858, intron 2 of 12)	intron (NR_027858, intron 2 of 12)	14154	NR_027858	627984	Mm.390378	NM_001039234	ENSMUSG00000092528	Nlrp1c-ps	Nalp1c|Nlrp1c|OTTMUSG00000006090	NLR family, pyrin domain containing 1C, pseudogene	pseudo
chr8-75	chr8	103918167	103918367	+	14.3	0.812	Intergenic	ORR1C2|LTR|ERVL-MaLR	-183358	NM_009868	12562	Mm.21767	NM_009868	ENSMUSG00000031871	Cdh5	7B4|AA408225|Cd144|VE-Cad|VECD|VEcad|Vec	cadherin 5	protein-coding
chr13-86	chr13	59554917	59555117	+	14.3	0.747	intron (NM_001048008, intron 1 of 17)	intron (NM_001048008, intron 1 of 17)	1905	NM_001284219	67269	Mm.153008	NM_023328	ENSMUSG00000021557	Agtpbp1	1700020N17Rik|2310001G17Rik|2900054O13Rik|4930445M19Rik|5730402G09Rik|CCP1|Nna1|nmf243|pcd	ATP/GTP binding protein 1	protein-coding
chr4-84	chr4	55925004	55925204	+	14.3	0.722	Intergenic	Intergenic	-392629	NM_010637	16600	Mm.4325	NM_010637	ENSMUSG00000003032	Klf4	EZF|Gklf|Zie	Kruppel-like factor 4 (gut)	protein-coding
chr9-44	chr9	65468075	65468275	+	14.1	0.73	intron (NM_138584, intron 2 of 8)	intron (NM_138584, intron 2 of 8)	7238	NM_138584	27965	Mm.272475	NM_138584	ENSMUSG00000032388	Spg21	ACP33|BM-019|C78576|D9Wsu18e|GL010|MAST	spastic paraplegia 21 homolog (human)	protein-coding
chr12-135	chr12	113366498	113366698	+	14.1	0.744	Intergenic	Intergenic	-122967	NM_001009545	238405	Mm.442216	NM_001009545	ENSMUSG00000051804	Adam6b	4930523C11Rik	a disintegrin and metallopeptidase domain 6B	protein-coding
chr16-47	chr16	33996118	33996318	+	14.1	0.821	intron (NM_177357, intron 51 of 59)	intron (NM_177357, intron 51 of 59)	-29215	NM_009471	22247	Mm.13145	NM_009471	ENSMUSG00000022814	Umps	1700095D23Rik|AA408257|AL033308|BB164745	uridine monophosphate synthetase	protein-coding
chr4-57	chr4	129507522	129507722	+	14.1	0.724	Intergenic	Intergenic	-5959	NM_010807	17357	Mm.424974	NM_010807	ENSMUSG00000047945	Marcksl1	AL022768|AW215397|AW536807|D4Bc1|F52|MacMARCKS|Macs2|Macs3|Mlp|Mrp	MARCKS-like 1	protein-coding
chr4-50	chr4	35157915	35158115	+	14.1	0.644	promoter-TSS (NM_178061)	promoter-TSS (NM_178061)	-531	NM_178061	214944	Mm.32968	NM_178061	ENSMUSG00000073910	Mob3b	8430436F23Rik|A430018A01Rik|Mobkl2b	MOB kinase activator 3B	protein-coding
chr2-60	chr2	92909692	92909892	+	14.1	0.783	Intergenic	Intergenic	-5309	NM_030725	80976	Mm.33490	NM_030725	ENSMUSG00000027220	Syt13	5730409J20Rik|AI549909|mKIAA1427	synaptotagmin XIII	protein-coding
chr11-101	chr11	20831326	20831526	+	14.1	0.829	promoter-TSS (NM_173752)	promoter-TSS (NM_173752)	-318	NM_173752	216551	Mm.76694	NM_173752	ENSMUSG00000042363	Lgalsl	1110067D22Rik|A530071M23|Grpa|Hspc159|Lgalsla	lectin, galactoside binding-like	protein-coding
chrX-7	chrX	159997517	159997717	+	14.1	0.74	intron (NM_001163085, intron 1 of 28)	intron (NM_001163085, intron 1 of 28)	9184	NM_001163085	270672	Mm.386889	NM_001163085	ENSMUSG00000031303	Map3k15	BC031147|MEKK15	mitogen-activated protein kinase kinase kinase 15	protein-coding
chr1-50	chr1	143739207	143739407	+	14.1	0.8	promoter-TSS (NM_001038592)	promoter-TSS (NM_001038592)	-42	NM_001038593	69367	Mm.272727	NM_023505	ENSMUSG00000018196	Glrx2	1700010P22Rik|AI645710|Grx2	glutaredoxin 2 (thioltransferase)	protein-coding
chr2-46	chr2	13224536	13224736	+	14.1	0.736	intron (NM_009105, intron 3 of 8)	intron (NM_009105, intron 3 of 8)	46779	NM_009105	20163	Mm.905	NM_009105	ENSMUSG00000026727	Rsu1	RsuI|rsp-1	Ras suppressor protein 1	protein-coding
chr13-56	chr13	84240407	84240607	+	14.1	0.9	intron (NR_029418, intron 1 of 10)	Lx6|LINE|L1	18211	NM_175187	72745	Mm.295063	NM_175187	ENSMUSG00000035762	Tmem161b	2810446P07Rik|AI843389	transmembrane protein 161B	protein-coding
chr4-65	chr4	115740706	115740906	+	14.1	0.764	intron (NM_172698, intron 2 of 11)	intron (NM_172698, intron 2 of 11)	2733	NM_172698	230648	Mm.283565	NM_172698	ENSMUSG00000034210	Efcab14	4732418C07Rik	EF-hand calcium binding domain 14	protein-coding
chr5-43	chr5	138425956	138426156	+	14.1	0.806	Intergenic	RLTR13C2|LTR|ERVK	-15420	NM_028130	72154	Mm.20263	NM_028130	ENSMUSG00000036898	Zfp157	2610020C11Rik|A630094N24Rik|AI327407|mszf12|mszf23-1	zinc finger protein 157	protein-coding
chr11-75	chr11	52224473	52224673	+	14.1	0.744	Intergenic	RLTR26C_MM|LTR|ERVK	-7422	NM_011543	21402	Mm.42944	NM_011543	ENSMUSG00000036309	Skp1a	15kDa|2610043E24Rik|2610206H23Rik|EMC19|OCP-II|OCP2|SKP1|Tceb1l|p19A|p19Skp1	S-phase kinase-associated protein 1A	protein-coding
chr6-89	chr6	125448554	125448754	+	14.1	0.738	Intergenic	RMER6A|LTR|ERVK	46101	NM_007657	12527	Mm.210676	NM_007657	ENSMUSG00000030342	Cd9	Tspan29	CD9 antigen	protein-coding
chr14-59	chr14	121456205	121456405	+	14.1	0.75	Intergenic	L1MB3|LINE|L1	48949	NM_053079	56643	Mm.155618	NM_053079	ENSMUSG00000025557	Slc15a1	D630032F02|PECT1|PEPT1	solute carrier family 15 (oligopeptide transporter), member 1	protein-coding
chr10-75	chr10	120827017	120827217	+	14.1	0.843	intron (NM_177092, intron 4 of 6)	intron (NM_177092, intron 4 of 6)	-30512	NR_038023	100504616	Mm.451174	NR_038023	ENSMUSG00000087480	Gm15910	OTTMUSG00000027725	predicted gene 15910	ncRNA
chr4-67	chr4	133978171	133978371	+	14.1	0.596	intron (NM_026144, intron 8 of 8)	intron (NM_026144, intron 8 of 8)	-10280	NM_016957	15331	Mm.319660	NM_016957	ENSMUSG00000003038	Hmgn2	HMG-17|Hmg17	high mobility group nucleosomal binding domain 2	protein-coding
chr16-27	chr16	19837535	19837735	+	14.1	0.711	Intergenic	L1_Mus3|LINE|L1	46639	NR_027896	68162	Mm.35159	NR_015488		A930003A15Rik	AI853191	RIKEN cDNA A930003A15 gene	ncRNA
chr14-38	chr14	32931890	32932090	+	14.1	0.806	intron (NM_178791, intron 7 of 7)	intron (NM_178791, intron 7 of 7)	-59392	NM_001146021	67580	Mm.46115	NM_026253	ENSMUSG00000041673	Lrrc18	4930442L21Rik|MTLR1	leucine rich repeat containing 18	protein-coding
chr14-20	chr14	124007313	124007513	+	14.1	0.862	intron (NR_045479, intron 2 of 3)	L1Md_F3|LINE|L1	19778	NR_045479	69393	Mm.491348	NR_045479	ENSMUSG00000099994	1700024B18Rik	-	RIKEN cDNA 1700024B18 gene	ncRNA
chr6-121	chr6	12742053	12742253	+	14.1	0.711	intron (NM_001164805, intron 1 of 26)	intron (NM_001164805, intron 1 of 26)	7100	NM_001164805	330267	Mm.11989	NM_001164805	ENSMUSG00000032625	Thsd7a	Gm837	thrombospondin, type I, domain containing 7A	protein-coding
chr12-148	chr12	102344228	102344428	+	14.1	0.741	intron (NM_001161365, intron 3 of 9)	intron (NM_001161365, intron 3 of 9)	60687	NM_001161365	217835	Mm.24145	NM_177620	ENSMUSG00000044456	Rin3	6430500K07|C86933	Ras and Rab interactor 3	protein-coding
chr5-61	chr5	24826474	24826674	+	14.1	0.63	intron (NM_053075, intron 1 of 7)	intron (NM_053075, intron 1 of 7)	15787	NM_053075	19744	Mm.319175	NM_053075	ENSMUSG00000028945	Rheb	Rheb1	Ras homolog enriched in brain	protein-coding
chr11-77	chr11	106180386	106180586	+	14.1	0.817	intron (NM_028126, intron 2 of 10)	intron (NM_028126, intron 2 of 10)	13117	NM_001252448	72149	Mm.403722	NM_028126	ENSMUSG00000069631	Strada	2610019A05Rik|6030402H20Rik|AI480680|E130112C09Rik	STE20-related kinase adaptor alpha	protein-coding
chr15-40	chr15	79793210	79793410	+	14.1	0.902	intron (NM_001013362, intron 6 of 8)	intron (NM_001013362, intron 6 of 8)	11399	NM_030689	73340	Mm.38438	NM_030689	ENSMUSG00000022421	Nptxr	1200009K17Rik|1700036C17Rik|5730406O18Rik|AI452369|AI785356|D15Bwg0580e|NPR|Npcd	neuronal pentraxin receptor	protein-coding
chr15-49	chr15	5426345	5426545	+	14.1	0.826	Intergenic	L1VL2|LINE|L1	-69873	NR_045274	71432	Mm.291087	NR_045274		5430437J10Rik	-	RIKEN cDNA 5430437J10 gene	ncRNA
chr19-39	chr19	26504109	26504309	+	14.1	0.75	Intergenic	Ricksha_c|DNA|MULE-MuDR	-100951	NM_011416	67155	Mm.342988	NM_011416	ENSMUSG00000024921	Smarca2	2610209L14Rik|SNF2alpha|Snf2l2|brahma|brm	SWI/SNF related, matrix associated, actin dependent regulator of chromatin, subfamily a, member 2	protein-coding
chr8-106	chr8	88580855	88581055	+	14.1	0.747	intron (NM_001163660, intron 2 of 7)	intron (NM_001163660, intron 2 of 7)	53322	NM_001163660	93960	Mm.30219	NM_027280	ENSMUSG00000031661	Nkd1	2810434J10Rik|9030215G15Rik|Nkd	naked cuticle 1 homolog (Drosophila)	protein-coding
chr11-129	chr11	120580096	120580296	+	13.8	0.61	exon (NM_133796, exon 2 of 6)	exon (NM_133796, exon 2 of 6)	1424	NM_133796	192662	Mm.30016	NM_133796	ENSMUSG00000025132	Arhgdia	5330430M07Rik|Gdi-1|Rho-GDI|RhoDGI|RhoGDI-1	Rho GDP dissociation inhibitor (GDI) alpha	protein-coding
chr3-38	chr3	108772763	108772963	+	13.8	0.703	intron (NM_177859, intron 7 of 11)	intron (NM_177859, intron 7 of 11)	33205	NM_177859	329738	Mm.72322	NM_177859	ENSMUSG00000049565	Aknad1	4921525H12Rik	AKNA domain containing 1	protein-coding
chr7-74	chr7	101901340	101901540	+	13.8	0.787	intron (NM_001081679, intron 2 of 3)	L2c|LINE|L2	2345	NM_001282088	791260	Mm.475469	NM_001081679	ENSMUSG00000078630	Tomt	Comt2|F930017I19Rik	transmembrane O-methyltransferase	protein-coding
chr12-127	chr12	51694306	51694506	+	13.8	0.817	intron (NM_021710, intron 1 of 5)	intron (NM_021710, intron 1 of 5)	-2492	NM_052973	94186	Mm.65979	NM_052973	ENSMUSG00000020954	Strn3	Gs2na|SG2NA	striatin, calmodulin binding protein 3	protein-coding
chr11-73	chr11	44529352	44529552	+	13.8	0.718	intron (NM_028862, intron 2 of 10)	intron (NM_028862, intron 2 of 10)	10075	NM_001166553	74315	Mm.156771	NM_028862	ENSMUSG00000019189	Rnf145	3732413I11Rik|TMRF1	ring finger protein 145	protein-coding
chr18-37	chr18	65554878	65555078	+	13.8	0.817	intron (NR_105742, intron 1 of 6)	intron (NR_105742, intron 1 of 6)	-25252	NM_207255	328977	Mm.286232	NM_207255	ENSMUSG00000042439	Zfp532	C530030I18Rik|Znf532|mKIAA1629	zinc finger protein 532	protein-coding
chr16-42	chr16	91607048	91607248	+	13.8	0.75	Intergenic	Intergenic	-9468	NM_030018	77975	Mm.290341	NM_030018	ENSMUSG00000022964	Tmem50b	AU015466|AU019872|B230114J08Rik	transmembrane protein 50B	protein-coding
chr2-72	chr2	21882398	21882598	+	13.8	0.747	Intergenic	Intergenic	-345005	NM_148413	667663	Mm.330033	NM_148413	ENSMUSG00000025716	Myo3a	9030416P08Rik	myosin IIIA	protein-coding
chr14-32	chr14	19995658	19995858	+	13.8	0.688	Intergenic	RMER16|LTR|ERVK	-18509	NM_001285909	14702	Mm.41737	NM_010315	ENSMUSG00000043004	Gng2	-	guanine nucleotide binding protein (G protein), gamma 2	protein-coding
chr2-85	chr2	45112150	45112350	+	13.8	0.779	promoter-TSS (NR_110571)	promoter-TSS (NR_110571)	-10	NR_110571	433424	Mm.441408	NR_110571	ENSMUSG00000052248	Zeb2os	Gm13476|OTTMUSG00000012358|Zeb2nat	zinc finger E-box binding homeobox 2, opposite strand	ncRNA
chr9-75	chr9	22307900	22308100	+	13.8	0.778	promoter-TSS (NM_145612)	promoter-TSS (NM_145612)	-362	NM_145612	235050	Mm.306038	NM_145612	ENSMUSG00000066829	Zfp810	BC005471	zinc finger protein 810	protein-coding
chr3-82	chr3	157651979	157652179	+	13.8	0.869	Intergenic	L1Md_T|LINE|L1	85187	NM_011196	19218	Mm.30424	NM_011196	ENSMUSG00000040016	Ptger3	EP3|Pgerep3|Ptgerep3	prostaglandin E receptor 3 (subtype EP3)	protein-coding
chr1-88	chr1	163804473	163804673	+	13.8	0.812	intron (NM_001305643, intron 5 of 19)	L1Md_F2|LINE|L1	24990	NM_010629	16579	Mm.4651	NM_010629	ENSMUSG00000026585	Kifap3	KAP-3|KAP3|SMAP	kinesin-associated protein 3	protein-coding
chr2-56	chr2	168080501	168080701	+	13.8	0.753	promoter-TSS (NM_021409)	promoter-TSS (NM_021409)	-403	NM_021409	58220	Mm.292834	NM_021409	ENSMUSG00000044641	Pard6b	AV025615|Par6b	par-6 family cell polarity regulator beta	protein-coding
chr19-38	chr19	24996550	24996750	+	13.8	0.681	Intergenic	Intergenic	-2879	NM_028785	76088	Mm.102485	NM_028785	ENSMUSG00000052085	Dock8	1200017A24Rik|5830472H07Rik|A130095G14Rik|AI461977	dedicator of cytokinesis 8	protein-coding
chr16-36	chr16	56715538	56715738	+	13.8	0.716	intron (NM_019678, intron 1 of 7)	intron (NM_019678, intron 1 of 7)	1812	NM_001252443	21787	Mm.425970	NM_019678	ENSMUSG00000022757	Tfg	AI173908	Trk-fused gene	protein-coding
chr1-52	chr1	170927573	170927773	+	13.8	0.73	promoter-TSS (NM_145141)	promoter-TSS (NM_145141)	-90	NR_027666	98752	Mm.1850	NM_145141	ENSMUSG00000038421	Fcrla	BB219290|FCRL|FCRL1|FREB|Fcrlm1|Fcrx|Freb1|mFREB|mFcrX	Fc receptor-like A	protein-coding
chr5-87	chr5	115237760	115237960	+	13.8	0.875	5' UTR (NM_026398, exon 2 of 6)	5' UTR (NM_026398, exon 2 of 6)	2009	NM_026398	117109	Mm.24636	NM_026398	ENSMUSG00000060152	Pop5	1500019J17Rik|2700077E03Rik|AW049989|Rnasep3	processing of precursor 5, ribonuclease P/MRP family (S. cerevisiae)	protein-coding
chr11-69	chr11	26080675	26080875	+	13.8	0.871	intron (NR_027973, intron 1 of 5)	intron (NR_027973, intron 1 of 5)	-121465	NR_105791	102466154		NR_105791	ENSMUSG00000099015	Mir6372	Gm27358|mmu-mir-6372	microRNA 6372	ncRNA
chr8-41	chr8	71569845	71570045	+	13.8	0.724	intron (NM_011977, intron 2 of 13)	CpG	1018	NM_011977	26457	Mm.38165	NM_011977	ENSMUSG00000031808	Slc27a1	FATP1|Fatp	solute carrier family 27 (fatty acid transporter), member 1	protein-coding
chr11-108	chr11	58026386	58026586	+	13.8	0.857	intron (NM_028451, intron 1 of 18)	intron (NM_028451, intron 1 of 18)	17422	NM_028451	73158	Mm.248843	NM_028451	ENSMUSG00000037331	Larp1	1810024J12Rik|3110040D16Rik|Larp|mKIAA0731	La ribonucleoprotein domain family, member 1	protein-coding
chr15-60	chr15	64283678	64283878	+	13.8	0.654	intron (NM_001276462, intron 1 of 27)	intron (NM_001276462, intron 1 of 27)	28895	NM_001276462	13196	Mm.277236	NM_010026	ENSMUSG00000022377	Asap1	AV239055|DEF-1|Ddef1|PAP|mKIAA1249|s19	ArfGAP with SH3 domain, ankyrin repeat and PH domain1	protein-coding
chr6-136	chr6	84274034	84274234	+	13.8	0.679	Intergenic	Intergenic	149704	NR_046063	100038556	Mm.387783	NR_046063	ENSMUSG00000107797	Gm10445	ENSMUSG00000072956	predicted gene 10445	ncRNA
chr19-30	chr19	38940451	38940651	+	13.8	0.809	intron (NM_008234, intron 5 of 21)	intron (NM_008234, intron 5 of 21)	9561	NM_008234	15201	Mm.57223	NM_008234	ENSMUSG00000025001	Hells	AI323785|E130115I21Rik|LSH|Lysh|PASG|YFK8	helicase, lymphoid specific	protein-coding
chr8-49	chr8	12607337	12607537	+	13.8	0.785	Intergenic	Intergenic	34388	NM_024279	78634	Mm.116871	NM_024279	ENSMUSG00000010435	Spaca7	1700094C09Rik	sperm acrosome associated 7	protein-coding
chr18-27	chr18	12199563	12199763	+	13.8	0.843	exon (NM_008720, exon 15 of 25)	exon (NM_008720, exon 15 of 25)	30933	NM_029623	76482	Mm.196596	NM_029623	ENSMUSG00000024410	3110002H16Rik	2400010D15Rik|Mic-1|Mic1	RIKEN cDNA 3110002H16 gene	protein-coding
chr14-26	chr14	121931632	121931832	+	13.8	0.782	intron (NM_026861, intron 4 of 8)	intron (NM_026861, intron 4 of 8)	-15958	NM_182806	110168	Mm.37405	NM_182806	ENSMUSG00000050350	Gpr18	-	G protein-coupled receptor 18	protein-coding
chr4-66	chr4	122897158	122897358	+	13.8	0.918	Intergenic	MTB|LTR|ERVL-MaLR	-11201	NM_001301067	12331	Mm.8687	NM_007598	ENSMUSG00000028656	Cap1	-	CAP, adenylate cyclase-associated protein 1 (yeast)	protein-coding
chr2-48	chr2	27566445	27566645	+	13.8	0.685	Intergenic	Intergenic	51398	NM_080848	140858	Mm.28265	NM_080848	ENSMUSG00000026917	Wdr5	2410008O07Rik|AA408785|AA960360|Big|Big-3	WD repeat domain 5	protein-coding
chr11-82	chr11	74505435	74505635	+	13.8	0.686	intron (NM_001015046, intron 2 of 24)	L1MC4a|LINE|L1	84623	NM_001015046	380711	Mm.425690	NM_001015046	ENSMUSG00000038807	Rap1gap2	AU067654|Garnl4|Gm1561|mKIAA1039	RAP1 GTPase activating protein 2	protein-coding
chr11-123	chr11	76288685	76288885	+	13.6	0.667	intron (NM_008750, intron 1 of 7)	intron (NM_008750, intron 1 of 7)	45049	NM_183263	67390	Mm.24886	NM_183263	ENSMUSG00000038046	Rnmtl1	4833420N02Rik|AI255153|HC90|Mrm3	RNA methyltransferase like 1	protein-coding
chr8-70	chr8	117536936	117537136	+	13.6	0.867	intron (NM_172285, intron 2 of 32)	B4A|SINE|B4	38745	NM_172285	234779	Mm.192699	NM_172285	ENSMUSG00000034330	Plcg2	PLC-gamma-2|PLCgamma2|Plcg-2	phospholipase C, gamma 2	protein-coding
chr7-100	chr7	130009245	130009445	+	13.6	0.903	Intergenic	Intergenic	47180	NR_046077	100043150	Mm.334264	NR_046077	ENSMUSG00000108504	Gm4265	-	predicted gene 4265	ncRNA
chr1-59	chr1	80713668	80713868	+	13.6	0.762	intron (NM_175291, intron 1 of 55)	intron (NM_175291, intron 1 of 55)	44785	NM_175291	210293	Mm.133473	NM_175291	ENSMUSG00000038608	Dock10	9330153B10Rik|A630054M16Rik|Jr4|Jr5|R75174|ZIZ3|Zizimin3|mKIAA0694	dedicator of cytokinesis 10	protein-coding
chr2-67	chr2	125189153	125189353	+	13.6	0.754	intron (NM_183354, intron 14 of 26)	intron (NM_183354, intron 14 of 26)	36653	NM_001079690	20495	Mm.3914	NM_011389	ENSMUSG00000027202	Slc12a1	AI788571|D630042G03Rik|Nkcc2|mBSC1|urehr3	solute carrier family 12, member 1	protein-coding
chr12-88	chr12	3653995	3654195	+	13.6	0.75	intron (NR_027869, intron 8 of 20)	L1Md_F2|LINE|L1	81054	NM_007886	13528	Mm.286202	NM_007886	ENSMUSG00000071454	Dtnb	-	dystrobrevin, beta	protein-coding
chr18-38	chr18	4959842	4960042	+	13.6	0.763	Intergenic	Intergenic	-86647	NM_153153	225115	Mm.136791	NM_153153	ENSMUSG00000024236	Svil	AU024053|B430302E16Rik	supervillin	protein-coding
chr18-63	chr18	46598624	46598824	+	13.6	0.779	intron (NM_010120, intron 2 of 2)	intron (NM_010120, intron 2 of 2)	1020	NM_010120	13664	Mm.262037	NM_010120	ENSMUSG00000057561	Eif1a	C76390|Ef1a|Eftu|Eif4c|eIF-1A|eIF-4C	eukaryotic translation initiation factor 1A	protein-coding
chr2-152	chr2	125322726	125322926	+	13.6	0.769	intron (NM_007993, intron 50 of 65)	intron (NM_007993, intron 50 of 65)	75311	NM_023595	110074	Mm.282499	NM_023595	ENSMUSG00000027203	Dut	5031412I06Rik|5133400F09Rik|D2Bwg0749e|Dutp|dUTPase	deoxyuridine triphosphatase	protein-coding
chr4-47	chr4	95167188	95167388	+	13.6	0.797	Intergenic	Intergenic	-115066	NM_010591	16476	Mm.275071	NM_010591	ENSMUSG00000052684	Jun	AP-1|Junc|c-jun	jun proto-oncogene	protein-coding
chr7-61	chr7	28112733	28112933	+	13.6	0.849	intron (NM_001122603, intron 16 of 19)	intron (NM_001122603, intron 16 of 19)	-16633	NM_001164655	319482	Mm.483194	NM_176924	ENSMUSG00000078776	9530053A07Rik	FCGBP	RIKEN cDNA 9530053A07 gene	protein-coding
chr11-169	chr11	84235329	84235529	+	13.6	0.949	intron (NM_133360, intron 8 of 53)	intron (NM_133360, intron 8 of 53)	39991	NM_133360	107476	Mm.31374	NM_133360	ENSMUSG00000020532	Acaca	A530025K05Rik|Acac|Acc1|Gm738	acetyl-Coenzyme A carboxylase alpha	protein-coding
chr7-109	chr7	3898231	3898431	+	13.6	0.691	promoter-TSS (NM_011094)	promoter-TSS (NM_011094)	-181	NM_001289428	18729	Mm.326531	NM_008848		Pira6	12M1|Pira10|p91B	paired-Ig-like receptor A6	protein-coding
chr14-31	chr14	47346463	47346663	+	13.6	0.707	Intergenic	Intergenic	-27297	NM_010705	16854	Mm.248615	NM_010705	ENSMUSG00000050335	Lgals3	GBP|L-34|Mac-2|gal3	lectin, galactose binding, soluble 3	protein-coding
chr10-32	chr10	25317752	25317952	+	13.6	0.764	Intergenic	RMER17C|LTR|ERVK	-18689	NM_018747	432442	Mm.485937	NM_018747	ENSMUSG00000039166	Akap7	6430401D08|AI662165|AKAP15|Akap18|BB170514	A kinase (PRKA) anchor protein 7	protein-coding
chr15-22	chr15	79229346	79229546	+	13.6	0.596	promoter-TSS (NM_001045558)	promoter-TSS (NM_001045558)	64	NM_001045558	18693	Mm.259464	NM_008837	ENSMUSG00000068206	Pick1	Prkcabp	protein interacting with C kinase 1	protein-coding
chr12-152	chr12	113332482	113332682	+	13.6	0.753	Intergenic	Intergenic	146679	NM_153776	69195	Mm.313244	NM_153776	ENSMUSG00000049036	Tmem121	2410008J05Rik|Hole	transmembrane protein 121	protein-coding
chr12-107	chr12	82189813	82190013	+	13.6	0.629	intron (NM_001167983, intron 1 of 23)	intron (NM_001167983, intron 1 of 23)	19897	NM_001167983	217692	Mm.261333	NM_172579	ENSMUSG00000042700	Sipa1l1	4931426N11Rik|AW213287|Spar|mKIAA0440	signal-induced proliferation-associated 1 like 1	protein-coding
chr16-35	chr16	19007423	19007623	+	13.6	0.761	Intergenic	Intergenic	130773	NM_010435	15260	Mm.15694	NM_010435	ENSMUSG00000022702	Hira	AA138857|D16Ertd95e|Gm15797|N28177|OTTMUSG00000026264|Tuple1	histone cell cycle regulator	protein-coding
chr17-68	chr17	17612707	17612907	+	13.6	0.841	intron (NM_172827, intron 1 of 17)	Lx5c|LINE|L1	11682	NM_172827	240028	Mm.328807	NM_172827	ENSMUSG00000023845	Lnpep	2010309L07Rik|4732490P18Rik|CAP|IRAP|PLAP|gp160|vp165	leucyl/cystinyl aminopeptidase	protein-coding
chr6-62	chr6	140623178	140623378	+	13.6	0.775	promoter-TSS (NM_009637)	promoter-TSS (NM_009637)	-224	NM_009637	11569	Mm.86453	NM_009637	ENSMUSG00000030232	Aebp2	AU023766|B230313N05Rik	AE binding protein 2	protein-coding
chr16-32	chr16	52083609	52083809	+	13.6	0.753	intron (NM_001033238, intron 3 of 17)	intron (NM_001033238, intron 3 of 17)	52160	NM_001033238	208650	Mm.328206	NM_001033238	ENSMUSG00000022637	Cblb	AI429560|AI851073|Cbl-b	Casitas B-lineage lymphoma b	protein-coding
chr14-43	chr14	75186894	75187094	+	13.6	0.701	intron (NM_008879, intron 2 of 16)	intron (NM_008879, intron 2 of 16)	50569	NM_008879	18826	Mm.153911	NM_008879	ENSMUSG00000021998	Lcp1	AW536232|D14Ertd310e|LCP-1|Pls2|pp65	lymphocyte cytosolic protein 1	protein-coding
chr11-93	chr11	78349229	78349429	+	13.6	0.67	TTS (NM_011676)	TTS (NM_011676)	2619	NM_001313987	22248	Mm.284811	NM_011676	ENSMUSG00000002058	Unc119	D11Bhm52|HRG4|MRG4|Rg4|Rtg4|Unc119h	unc-119 lipid binding chaperone	protein-coding
chr11-72	chr11	69098592	69098792	+	13.6	0.654	promoter-TSS (NM_011065)	promoter-TSS (NM_011065)	-264	NM_011065	18626	Mm.7373	NM_011065	ENSMUSG00000020893	Per1	Hftm|Per|m-rigui|mPer1	period circadian clock 1	protein-coding
chrX-6	chrX	95195571	95195771	+	13.3	0.831	Intergenic	Intergenic	-29132	NM_001033329	236915	Mm.44841	NM_001033329	ENSMUSG00000025656	Arhgef9	9630036L12Rik	CDC42 guanine nucleotide exchange factor (GEF) 9	protein-coding
chr6-90	chr6	47652954	47653154	+	13.3	0.949	Intergenic	(CAAA)n|Simple_repeat|Simple_repeat	2040	NR_002841	19799		NR_002841		Rn4.5s	-	4.5S RNA	rRNA
chr12-230	chr12	35538836	35539036	+	13.3	0.747	Intergenic	Intergenic	-3947	NM_001314027	11622	Mm.341377	NM_013464	ENSMUSG00000019256	Ahr	Ah|Ahh|Ahre|In|bHLHe76	aryl-hydrocarbon receptor	protein-coding
chr1-104	chr1	173949151	173949351	+	13.3	0.803	Intergenic	Lx5|LINE|L1	-6579	NM_001302650	15950	Mm.463437	NM_008328	ENSMUSG00000039997	Ifi203	Mndal	interferon activated gene 203	protein-coding
chr2-50	chr2	19506531	19506731	+	13.3	0.844	intron (NM_027600, intron 8 of 16)	RLTR30|LTR|ERV1	47279	NM_027600	70909	Mm.158488	NM_027600	ENSMUSG00000026734	4921504E06Rik	4921522E24Rik	RIKEN cDNA 4921504E06 gene	protein-coding
chr4-127	chr4	137495524	137495724	+	13.3	0.864	intron (NM_008305, intron 1 of 96)	intron (NM_008305, intron 1 of 96)	26821	NM_008305	15530	Mm.273662	NM_008305	ENSMUSG00000028763	Hspg2	AI852380|Pcn|Plc|per	perlecan (heparan sulfate proteoglycan 2)	protein-coding
chr11-118	chr11	74994572	74994772	+	13.3	0.688	intron (NM_001002764, intron 10 of 18)	intron (NM_001002764, intron 10 of 18)	68800	NM_001002764	103677	Mm.288460	NM_001002764	ENSMUSG00000038290	Smg6	AI317223|AU041178	Smg-6 homolog, nonsense mediated mRNA decay factor (C. elegans)	protein-coding
chr2-65	chr2	158743940	158744140	+	13.3	0.651	intron (NM_153089, intron 3 of 10)	L2c|LINE|L2	-24059	NM_027975	71878	Mm.85162	NM_027975	ENSMUSG00000027654	Fam83d	2310007D09Rik|BB104611	family with sequence similarity 83, member D	protein-coding
chr10-67	chr10	34187034	34187234	+	13.3	0.633	intron (NM_172508, intron 1 of 5)	intron (NM_172508, intron 1 of 5)	20417	NM_172508	212898	Mm.34557	NM_172508	ENSMUSG00000039497	Dse	6030499O08|AI480506|B130024B19Rik|DS-epi1|Sart2	dermatan sulfate epimerase	protein-coding
chr12-123	chr12	10614747	10614947	+	13.3	0.731	Intergenic	MLTR25C|LTR|ERVK	168459	NR_110487	328061	Mm.56067	NR_110487		Gm38407	4931412M21	predicted gene, 38407	ncRNA
chr11-95	chr11	94993176	94993376	+	13.3	0.727	intron (NM_172261, intron 1 of 9)	intron (NM_172261, intron 1 of 9)	2064	NM_172261	217124	Mm.229087	NM_172261	ENSMUSG00000038976	Ppp1r9b	SPL|Spn	protein phosphatase 1, regulatory subunit 9B	protein-coding
chr12-131	chr12	98800462	98800662	+	13.3	0.663	intron (NM_001081191, intron 35 of 43)	intron (NM_001081191, intron 35 of 43)	29540	NM_001160108	75553	Mm.25549	NM_029334	ENSMUSG00000021012	Zc3h14	1010001P15Rik|1700016A15Rik|2700069A02Rik|AU014748	zinc finger CCCH type containing 14	protein-coding
chr11-106	chr11	100989688	100989888	+	13.3	0.841	Intergenic	RMER10B|LTR|ERVL	-19171	NM_008986	19285	Mm.21864	NM_008986	ENSMUSG00000004044	Ptrf	2310075E07Rik|AW546441|Cav-p60|Cavin	polymerase I and transcript release factor	protein-coding
chrX-5	chrX	126777735	126777935	+	13.3	0.879	Intergenic	Intergenic	56169	NM_177705	237029	Mm.60998	NM_177705	ENSMUSG00000058670	4932411N23Rik	-	RIKEN cDNA 4932411N23 gene	protein-coding
chr3-72	chr3	121345033	121345233	+	13.3	0.85	intron (NM_024178, intron 3 of 3)	intron (NM_024178, intron 3 of 3)	53316	NM_024178	66789	Mm.269881	NM_024178	ENSMUSG00000039887	Alg14	5430428G01Rik|AI854024	asparagine-linked glycosylation 14	protein-coding
chr7-56	chr7	81278794	81278994	+	13.3	0.797	intron (NM_008803, intron 1 of 21)	L3|LINE|CR1	65090	NM_008803	18584	Mm.371577	NM_008803	ENSMUSG00000025584	Pde8a	AI551852|Pde8	phosphodiesterase 8A	protein-coding
chr18-49	chr18	32111632	32111832	+	13.3	0.883	Intergenic	RMER10A|LTR|ERVL	26473	NM_008934	19123	Mm.2786	NM_008934	ENSMUSG00000024386	Proc	PC	protein C	protein-coding
chr2-58	chr2	52916805	52917005	+	13.3	0.704	intron (NM_172409, intron 1 of 26)	MTC|LTR|ERVL-MaLR	59037	NM_172409	71409	Mm.394427	NM_172409	ENSMUSG00000036053	Fmnl2	5430425K04Rik|Man	formin-like 2	protein-coding
chr6-106	chr6	124284613	124284813	+	13.3	0.788	Intergenic	L1Md_F|LINE|L1	-19938	NM_001170395	93671	Mm.37426	NM_053094	ENSMUSG00000008845	Cd163	CD163v2|CD163v3	CD163 antigen	protein-coding
chr1-97	chr1	67695561	67695761	+	13.3	0.725	Intergenic	Lx|LINE|L1	572634	NM_001080809	227231	Mm.343942	NM_001080809	ENSMUSG00000025991	Cps1	4732433M03Rik|CPS|D1Ucla3	carbamoyl-phosphate synthetase 1	protein-coding
chr13-58	chr13	32907683	32907883	+	13.3	0.773	Intergenic	Intergenic	-9643	NM_173051	380839	Mm.250802	NM_173051	ENSMUSG00000079049	Serpinb1c	EIC|ovalbumin	serine (or cysteine) peptidase inhibitor, clade B, member 1c	protein-coding
chr15-45	chr15	76119064	76119264	+	13	0.684	TTS (NM_001142968)	TTS (NM_001142968)	1031	NM_144848	223650	Mm.259929	NM_144848		Eppk1	6230424I18Rik|EPIPL|EPIPL1|EPPK	epiplakin 1	protein-coding
chr6-157	chr6	137491881	137492081	+	13	0.793	intron (NM_001271589, intron 10 of 13)	intron (NM_001271589, intron 10 of 13)	27914	NM_001271589	13860	Mm.235346	NM_007945	ENSMUSG00000015766	Eps8	AW261790	epidermal growth factor receptor pathway substrate 8	protein-coding
chr2-71	chr2	151996960	151997160	+	13	0.692	intron (NM_027172, intron 1 of 4)	intron (NM_027172, intron 1 of 4)	549	NM_027172	69698	Mm.258262	NM_027172	ENSMUSG00000027463	Slc52a3	2310046K01Rik|RFT2	solute carrier protein family 52, member 3	protein-coding
chr11-116	chr11	49696583	49696783	+	13	0.845	intron (NM_212484, intron 2 of 11)	B3A|SINE|B2	5971	NM_001290741	104625	Mm.247113	NM_212484	ENSMUSG00000020362	Cnot6	CCR4	CCR4-NOT transcription complex, subunit 6	protein-coding
chr9-86	chr9	94932919	94933119	+	13	0.697	intron (NM_177909, intron 6 of 15)	intron (NM_177909, intron 6 of 15)	181190	NR_106116	102465763		NR_106116	ENSMUSG00000098251	Mir7656	Gm27614|mmu-mir-7656	microRNA 7656	ncRNA
chr11-170	chr11	87019555	87019755	+	13	0.871	intron (NR_106195, intron 4 of 8)	intron (NR_106195, intron 4 of 8)	-25893	NM_001005341	77864	Mm.191894	NM_001005341	ENSMUSG00000018427	Ypel2	6430570G24|E130113K08Rik	yippee-like 2 (Drosophila)	protein-coding
chr12-210	chr12	104752577	104752777	+	13	0.812	promoter-TSS (NM_148948)	promoter-TSS (NM_148948)	-725	NM_148948	192119	Mm.21135	NM_148948	ENSMUSG00000041415	Dicer1	1110006F08Rik|D12Ertd7e|mKIAA0928	dicer 1, ribonuclease type III	protein-coding
chr17-80	chr17	80356241	80356441	+	13	0.62	intron (NM_001145452, intron 8 of 17)	IMPB_01|Satellite|Satellite	17201	NR_028385	791338	Mm.204722	NR_028385		Gm10190	ENSMUSG00000066938	predicted gene 10190	ncRNA
chr3-63	chr3	90154650	90154850	+	13	0.776	intron (NM_029937, intron 15 of 39)	intron (NM_029937, intron 15 of 39)	50618	NM_029937	77595	Mm.159949	NM_029937	ENSMUSG00000027939	Nup210l	4930548O11Rik|R26-EGFP|Tg(Gt(ROSA)26Sor-EGFP)130910Eps	nucleoporin 210-like	protein-coding
chr13-78	chr13	12570250	12570450	+	13	0.85	intron (NM_026184, intron 1 of 15)	intron (NM_026184, intron 1 of 15)	4467	NM_026184	67475	Mm.358706	NM_026184	ENSMUSG00000057069	Ero1lb	1300013B24Rik|1700065B09Rik|AI447560|Ero1b|ero1-beta	ERO1-like beta (S. cerevisiae)	protein-coding
chr19-48	chr19	3943259	3943459	+	13	0.679	intron (NM_019449, intron 7 of 10)	B1_Mur2|SINE|Alu	8173	NM_001161428	54445	Mm.262094	NM_019449	ENSMUSG00000036908	Unc93b1	Unc-93B1|Unc93b	unc-93 homolog B1 (C. elegans)	protein-coding
chr10-57	chr10	82952978	82953178	+	13	0.729	Intergenic	Intergenic	-32419	NM_021439	58250	Mm.360747	NM_021439	ENSMUSG00000034612	Chst11	1110020P09Rik|C4ST|C4ST-1|C4ST1|C4s	carbohydrate sulfotransferase 11	protein-coding
chr3-67	chr3	135285024	135285224	+	13	0.797	intron (NM_027208, intron 1 of 9)	intron (NM_027208, intron 1 of 9)	3903	NM_027208	69772	Mm.45121	NM_027208	ENSMUSG00000028167	Bdh2	1810026B04Rik|Dhrs6	3-hydroxybutyrate dehydrogenase, type 2	protein-coding
chr13-92	chr13	9626070	9626270	+	13	0.746	intron (NM_001081426, intron 28 of 36)	CT-rich|Low_complexity|Low_complexity	139144	NM_001199141	66505	Mm.397307	NM_144516	ENSMUSG00000021156	Zmynd11	2210402G22Rik|BS69	zinc finger, MYND domain containing 11	protein-coding
chr7-206	chr7	118904330	118904530	+	13	0.7	intron (NM_001081446, intron 6 of 8)	MIR|SINE|MIR	-48432	NM_023197	66356	Mm.482278	NM_023197	ENSMUSG00000030980	Knop1	2310008H09Rik|Tsg118	lysine rich nucleolar protein 1	protein-coding
chr13-35	chr13	35474297	35474497	+	13	0.821	Intergenic	Intergenic	-185465	NM_009881	12593	Mm.29002	NM_009881	ENSMUSG00000059288	Cdyl	AI325931	chromodomain protein, Y chromosome-like	protein-coding
chr9-67	chr9	32394817	32395017	+	13	0.8	intron (NM_001168354, intron 1 of 1)	intron (NM_001168354, intron 1 of 1)	932	NM_001168354	56379	Mm.390168	NM_019659	ENSMUSG00000041248	Kcnj1	Kir1.1|ROMK|Romk2	potassium inwardly-rectifying channel, subfamily J, member 1	protein-coding
chr5-79	chr5	75576274	75576474	+	13	0.788	intron (NM_001122733, intron 1 of 20)	intron (NM_001122733, intron 1 of 20)	1383	NM_021099	16590	Mm.247073	NM_021099	ENSMUSG00000005672	Kit	Bs|CD117|Fdc|Gsfsco1|Gsfsco5|Gsfsow3|SCO1|SCO5|SOW3|Ssm|Tr-kit|W|c-KIT	KIT proto-oncogene receptor tyrosine kinase	protein-coding
chr12-166	chr12	21172388	21172588	+	13	0.679	intron (NM_001135192, intron 2 of 28)	intron (NM_001135192, intron 2 of 28)	60732	NM_001135192	211914	Mm.358946	NM_001004364	ENSMUSG00000052632	Asap2	6530401G17Rik|Ddef2|Gm1523|Gm592|PAG3|PAP	ArfGAP with SH3 domain, ankyrin repeat and PH domain 2	protein-coding
chr10-87	chr10	84791428	84791628	+	13	0.684	intron (NM_001024918, intron 2 of 17)	intron (NM_001024918, intron 2 of 17)	35480	NM_001024918	71137	Mm.79070	NM_027689	ENSMUSG00000020037	Rfx4	4933412G19Rik|NYD-sp10	regulatory factor X, 4 (influences HLA class II expression)	protein-coding
chr8-109	chr8	125651780	125651980	+	13	0.663	Intergenic	B4A|SINE|B4	-17938	NM_028908	74393	Mm.41709	NM_028908	ENSMUSG00000050930	Map10	4933403G14Rik|AI835009|mKIAA1383	microtubule-associated protein 10	protein-coding
chr11-149	chr11	73136134	73136334	+	13	0.757	exon (NM_010353, exon 1 of 1)	exon (NM_010353, exon 1 of 1)	2060	NM_010353	14841	Mm.42045	NM_010353	ENSMUSG00000050107	Gsg2	Haspin	germ cell associated 2, haspin	protein-coding
chr4-62	chr4	9125594	9125794	+	13	0.827	Intergenic	Intergenic	-143623	NM_028940	74438	Mm.473368	NM_028940	ENSMUSG00000041216	Clvs1	4933402J24Rik|Clvl1|Rlbp1l1	clavesin 1	protein-coding
chr12-191	chr12	108197605	108197805	+	13	0.743	intron (NM_009832, intron 10 of 11)	B1_Mur1|SINE|Alu	17967	NM_009832	12454	Mm.474441	NM_009832	ENSMUSG00000021258	Ccnk	AW123198|AW413594|CPR4|CycK	cyclin K	protein-coding
chr12-115	chr12	116282059	116282259	+	13	0.679	intron (NM_028731, intron 1 of 21)	intron (NM_028731, intron 1 of 21)	937	NM_028731	52635	Mm.273755	NM_028731	ENSMUSG00000021171	Esyt2	2410017M09Rik|4921504I16Rik|CHR2SYT|D12Ertd551e|Fam62b	extended synaptotagmin-like protein 2	protein-coding
chr16-54	chr16	58721548	58721748	+	13	0.806	Intergenic	Lx5c|LINE|L1	-2924	NM_001162955	71223	Mm.359970	NM_001162955	ENSMUSG00000047293	Gpr15	4933439K08Rik	G protein-coupled receptor 15	protein-coding
chr3-135	chr3	92150888	92151088	+	13	0.867	Intergenic	Lx5b|LINE|L1	-8234	NM_027042	69332	Mm.120271	NM_027042	ENSMUSG00000027927	Lelp1	1700012F11Rik	late cornified envelope-like proline-rich 1	protein-coding
chr8-91	chr8	117149854	117150054	+	13	0.685	Intergenic	Intergenic	-8181	NM_001081151	209239	Mm.132992	NM_001081151	ENSMUSG00000052557	Gan	A330045G18|gigaxonin	giant axonal neuropathy	protein-coding
chr7-54	chr7	25279242	25279442	+	13	0.761	intron (NM_001302811, intron 2 of 20)	intron (NM_001302811, intron 2 of 20)	-2837	NM_027882	71722	Mm.28833	NM_027882	ENSMUSG00000005442	Cic	1200010B10Rik|mKIAA0306	capicua transcriptional repressor	protein-coding
chr2-229	chr2	90490727	90490927	+	13	0.8	intron (NM_008982, intron 1 of 23)	intron (NM_008982, intron 1 of 23)	-11653	NM_001135657	19271	Mm.330393	NM_008982	ENSMUSG00000025314	Ptprj	AI450271|BET|Byp|CD148|DEP-1|PTPbeta2|Ptpb2|RPTPJ|Scc-1|Scc1	protein tyrosine phosphatase, receptor type, J	protein-coding
chr2-77	chr2	76048730	76048930	+	13	0.825	intron (NM_001081033, intron 14 of 19)	intron (NM_001081033, intron 14 of 19)	-66863	NM_030188	78802	Mm.282339	NM_030188	ENSMUSG00000075271	Ttc30a1	4930506L13Rik	tetratricopeptide repeat domain 30A1	protein-coding
chr10-46	chr10	108224515	108224715	+	13	0.554	intron (NM_027892, intron 3 of 25)	intron (NM_027892, intron 3 of 25)	62215	NM_027892	17931	Mm.422959	NM_027892	ENSMUSG00000019907	Ppp1r12a	1200015F06Rik|5730577I22Rik|AA792106|AV099298|D10Ertd625e|Mypt1	protein phosphatase 1, regulatory (inhibitor) subunit 12A	protein-coding
chr10-56	chr10	67410138	67410338	+	13	0.754	Intergenic	Intergenic	-124957	NM_001036293	641340	Mm.136223	NM_001036293	ENSMUSG00000075000	Nrbf2	NRBF-2	nuclear receptor binding factor 2	protein-coding
chr2-59	chr2	60037413	60037613	+	13	0.7	intron (NM_001001182, intron 2 of 35)	intron (NM_001001182, intron 2 of 35)	88227	NM_001001182	407823	Mm.228071	NM_001001182	ENSMUSG00000026987	Baz2b	5830435C13Rik|BC053917|D2Ertd794e	bromodomain adjacent to zinc finger domain, 2B	protein-coding
chr11-100	chr11	94149867	94150067	+	13	0.644	Intergenic	MLT1H1|LTR|ERVL-MaLR	-61487	NM_009427	22057	Mm.259673	NM_009427	ENSMUSG00000037573	Tob1	Tob|Trob	transducer of ErbB-2.1	protein-coding
chr6-81	chr6	124894172	124894372	+	12.8	0.704	Intergenic	MTB|LTR|ERVL-MaLR	-6063	NM_013488	12504	Mm.2209	NM_013488	ENSMUSG00000023274	Cd4	L3T4|Ly-4	CD4 antigen	protein-coding
chr9-78	chr9	77920996	77921196	+	12.8	0.793	intron (NM_134255, intron 1 of 7)	intron (NM_134255, intron 1 of 7)	3731	NM_134255	68801	Mm.430736	NM_134255	ENSMUSG00000032349	Elovl5	1110059L23Rik|AI747313|AU043003|HELO1	ELOVL family member 5, elongation of long chain fatty acids (yeast)	protein-coding
chr17-47	chr17	27790043	27790243	+	12.8	0.776	intron (NM_001044719, intron 2 of 4)	intron (NM_001044719, intron 2 of 4)	30399	NM_001033279	224647	Mm.196577	NM_001033279	ENSMUSG00000056692	D17Wsu92e	AU020189|C030010A15|C80239	DNA segment, Chr 17, Wayne State University 92, expressed	protein-coding
chr4-131	chr4	48023084	48023284	+	12.8	0.785	Intergenic	MLT1J2|LTR|ERVL-MaLR	-22121	NM_015743	18124	Mm.247261	NM_015743	ENSMUSG00000028341	Nr4a3	AI573420|CHN|CSMF|MINOR|NOR-1|Nor1|TEC	nuclear receptor subfamily 4, group A, member 3	protein-coding
chr1-106	chr1	86503356	86503556	+	12.8	0.598	Intergenic	Intergenic	-23280	NM_008972	19231	Mm.19187	NM_008972	ENSMUSG00000026238	Ptma	Thym	prothymosin alpha	protein-coding
chr8-74	chr8	85943012	85943212	+	12.8	0.757	intron (NM_199446, intron 11 of 31)	intron (NM_199446, intron 11 of 31)	102110	NM_199446	102093	Mm.237296	NM_199446	ENSMUSG00000036879	Phkb	AI463271	phosphorylase kinase beta	protein-coding
chr11-133	chr11	74955213	74955413	+	12.8	0.644	intron (NM_001002764, intron 8 of 18)	ORR1F|LTR|ERVL-MaLR	29441	NM_001002764	103677	Mm.288460	NM_001002764	ENSMUSG00000038290	Smg6	AI317223|AU041178	Smg-6 homolog, nonsense mediated mRNA decay factor (C. elegans)	protein-coding
chr2-63	chr2	109216812	109217012	+	12.8	0.839	intron (NM_029790, intron 2 of 5)	intron (NM_029790, intron 2 of 5)	61378	NM_029790	76894	Mm.330451	NM_029790	ENSMUSG00000057234	Mettl15	0610027B03Rik|AI303697|AW049952|Mett5d1	methyltransferase like 15	protein-coding
chr4-71	chr4	145299911	145300111	+	12.8	0.64	intron (NM_009401, intron 2 of 12)	intron (NM_009401, intron 2 of 12)	15136	NM_009401	21941	Mm.12810	NM_009401	ENSMUSG00000028602	Tnfrsf8	Cd30|D1S166E|Ki|Ki-1	tumor necrosis factor receptor superfamily, member 8	protein-coding
chr2-84	chr2	30063952	30064152	+	12.8	0.8	intron (NM_023871, intron 1 of 7)	intron (NM_023871, intron 1 of 7)	2056	NM_023871	56086	Mm.326055	NM_023871	ENSMUSG00000054766	Set	2610030F17Rik|5730420M11Rik|AA407739|I-2PP2A|StF-IT-1|TAF-I	SET nuclear oncogene	protein-coding
chr6-150	chr6	108127664	108127864	+	12.8	0.8	intron (NM_145937, intron 7 of 8)	intron (NM_145937, intron 7 of 8)	57819	NM_145937	58911	Mm.439876	NM_145937	ENSMUSG00000030101	Sumf1	AA543204|AI463102|AI851573|FGE	sulfatase modifying factor 1	protein-coding
chr6-95	chr6	116679605	116679805	+	12.8	0.614	Intergenic	Intergenic	-5869	NM_178045	213391	Mm.257931	NM_178045	ENSMUSG00000042129	Rassf4	3830411C14Rik|AD037|AI586137	Ras association (RalGDS/AF-6) domain family member 4	protein-coding
chr9-68	chr9	32484863	32485063	+	12.8	0.823	intron (NM_008026, intron 1 of 8)	intron (NM_008026, intron 1 of 8)	56489	NM_008026	14247	Mm.258908	NM_008026	ENSMUSG00000016087	Fli1	EWSR2|Fli-1|SIC-1|Sic1	Friend leukemia integration 1	protein-coding
chr4-64	chr4	109185383	109185583	+	12.8	0.765	intron (NM_133885, intron 1 of 22)	intron (NM_133885, intron 1 of 22)	16789	NM_133885	100273	Mm.366315	NM_133885	ENSMUSG00000028559	Osbpl9	2600011I06Rik|AU015843|Orp-9	oxysterol binding protein-like 9	protein-coding
chr8-86	chr8	14996167	14996367	+	12.8	0.75	intron (NM_172751, intron 27 of 28)	intron (NM_172751, intron 27 of 28)	-14758	NM_029116	74901	Mm.46675	NM_029116	ENSMUSG00000055675	Kbtbd11	2900016B01Rik|4930465M17Rik|mKIAA0711	kelch repeat and BTB (POZ) domain containing 11	protein-coding
chr3-95	chr3	116861271	116861471	+	12.8	0.683	promoter-TSS (NM_009146)	promoter-TSS (NM_009146)	-309	NM_009146	20321	Mm.66293	NM_009146	ENSMUSG00000033386	Frrs1	AI131732|Sdfr2	ferric-chelate reductase 1	protein-coding
chr2-125	chr2	90583576	90583776	+	12.8	0.781	Intergenic	Intergenic	-3029	NM_008982	19271	Mm.330393	NM_008982	ENSMUSG00000025314	Ptprj	AI450271|BET|Byp|CD148|DEP-1|PTPbeta2|Ptpb2|RPTPJ|Scc-1|Scc1	protein tyrosine phosphatase, receptor type, J	protein-coding
chr9-94	chr9	60944427	60944627	+	12.8	0.781	Intergenic	Intergenic	-72542	NR_040767	330956	Mm.207985	NR_040767	ENSMUSG00000111290	Gm5122	A430102L10	predicted gene 5122	ncRNA
chr18-42	chr18	79256370	79256570	+	12.8	0.81	Intergenic	MLT1K|LTR|ERVL-MaLR	-147079	NM_053099	240427	Mm.312871	NM_053099	ENSMUSG00000024548	Setbp1	C130092E12|Seb|mKIAA0437	SET binding protein 1	protein-coding
chr17-90	chr17	53941177	53941377	+	12.8	0.812	Intergenic	Intergenic	49354	NM_018751	20888	Mm.10108	NM_018751	ENSMUSG00000023943	Sult1c1	(PST)G|P-SULT|ST1C1|Stp2|Sult1a2|mOLFST	sulfotransferase family, cytosolic, 1C, member 1	protein-coding
chr7-133	chr7	101612320	101612520	+	12.8	0.902	Intergenic	Lx9|LINE|L1	-31259	NM_019915	11872	Mm.57008	NM_019915	ENSMUSG00000030651	Art2b	ART2.2|ARTC2|Art|Ly92b|Rt-6|Rt6|Rt6-2	ADP-ribosyltransferase 2b	protein-coding
chr6-166	chr6	115344096	115344296	+	12.8	0.637	Intergenic	Intergenic	-16755	NM_001127330	19016	Mm.3020	NM_011146	ENSMUSG00000000440	Pparg	Nr1c3|PPAR-gamma|PPAR-gamma2|PPARgamma|PPARgamma2	peroxisome proliferator activated receptor gamma	protein-coding
chr2-73	chr2	33682372	33682572	+	12.8	0.864	Intergenic	Intergenic	41279	NR_046275	100504399	Mm.72070	NM_177842		C130021I20Rik	-	Riken cDNA C130021I20 gene	ncRNA
chr11-115	chr11	23813595	23813795	+	12.8	0.881	Intergenic	Lx3_Mus|LINE|L1	-42725	NM_009044	19696	Mm.4869	NM_009044	ENSMUSG00000020275	Rel	c-Rel	reticuloendotheliosis oncogene	protein-coding
chr19-42	chr19	46343557	46343757	+	12.5	0.611	TTS (NR_030468)	TTS (NR_030468)	895	NR_030468	751550		NR_030468	ENSMUSG00000070127	Mir146b	Mirn146b|mir-146b	microRNA 146b	ncRNA
chr17-76	chr17	13761088	13761288	+	12.5	0.96	intron (NM_010806, intron 1 of 32)	CpG	206	NM_022311	21646	Mm.486358	NM_022311	ENSMUSG00000038347	Tcte2	AI429268|Tcte-2	t-complex-associated testis expressed 2	protein-coding
chr1-68	chr1	37308603	37308803	+	12.5	0.724	intron (NM_001290797, intron 1 of 25)	(TC)n|Simple_repeat|Simple_repeat	8865	NM_001290797	269180	Mm.5294	NM_030266	ENSMUSG00000026113	Inpp4a	107kDa|9630012D15|D130048C09Rik|R74740	inositol polyphosphate-4-phosphatase, type I	protein-coding
chr1-77	chr1	92536948	92537148	+	12.5	0.897	Intergenic	Intergenic	-18533	NM_147039	259041	Mm.223424	NM_147039	ENSMUSG00000042849	Olfr1414	MOR103-2	olfactory receptor 1414	protein-coding
chr2-115	chr2	115581924	115582124	+	12.5	0.754	intron (NM_001145898, intron 1 of 10)	intron (NM_001145898, intron 1 of 10)	308	NM_001145898	399568	Mm.134929	NM_207264	ENSMUSG00000040282	BC052040	-	cDNA sequence BC052040	protein-coding
chr14-44	chr14	32513723	32513923	+	12.5	0.692	intron (NM_001081221, intron 1 of 20)	CpG	302	NM_001081221	319955	Mm.318310	NM_177043	ENSMUSG00000054051	Ercc6	4732403I04|C130058G22Rik|CSB	excision repair cross-complementing rodent repair deficiency, complementation group 6	protein-coding
chr18-46	chr18	56926905	56927105	+	12.5	0.775	Intergenic	Intergenic	-1457	NM_177115	320253	Mm.312623	NM_177115	ENSMUSG00000032656	March3	6330411I15Rik|A530081L18Rik|AI843639|MARCH-III	membrane-associated ring finger (C3HC4) 3	protein-coding
chr3-83	chr3	60472443	60472643	+	12.5	0.785	promoter-TSS (NM_001253713)	promoter-TSS (NM_001253713)	-287	NM_001253713	56758	Mm.255723	NM_020007	ENSMUSG00000027763	Mbnl1	Mbnl|mKIAA0428	muscleblind-like 1 (Drosophila)	protein-coding
chr15-95	chr15	64284999	64285199	+	12.5	0.743	intron (NM_001276462, intron 1 of 27)	intron (NM_001276462, intron 1 of 27)	27574	NM_001276462	13196	Mm.277236	NM_010026	ENSMUSG00000022377	Asap1	AV239055|DEF-1|Ddef1|PAP|mKIAA1249|s19	ArfGAP with SH3 domain, ankyrin repeat and PH domain1	protein-coding
chr10-48	chr10	19569451	19569651	+	12.5	0.772	Intergenic	Intergenic	-22407	NM_010511	15979	Mm.549	NM_010511	ENSMUSG00000020009	Ifngr1	CD119|IFN-gammaR|Ifgr|Ifngr|Nktar	interferon gamma receptor 1	protein-coding
chr2-107	chr2	166625223	166625423	+	12.5	0.781	intron (NM_177782, intron 5 of 39)	intron (NM_177782, intron 5 of 39)	-47395	NR_105783	102465188		NR_105783	ENSMUSG00000098675	Mir6364	Gm27327|mmu-mir-6364	microRNA 6364	ncRNA
chr6-130	chr6	108214575	108214775	+	12.5	0.787	intron (NM_010585, intron 2 of 61)	intron (NM_010585, intron 2 of 61)	1579	NM_010585	16438	Mm.227912	NM_010585	ENSMUSG00000030102	Itpr1	D6Pas2|ENSMUSG00000072853|Gm10429|IP3R 1|IP3R1|InsP3R|Ip3r|Itpr-1|P400|Pcp-1|Pcp1|insP3R1|opt|wblo	inositol 1,4,5-trisphosphate receptor 1	protein-coding
chr13-71	chr13	23373607	23373807	+	12.5	0.857	intron (NR_131052, intron 3 of 3)	intron (NR_131052, intron 3 of 3)	-4499	NM_001286155	218100	Mm.286454	NM_172586	ENSMUSG00000046351	Zfp322a	Znf322|Znf322a	zinc finger protein 322A	protein-coding
chr7-130	chr7	96406610	96406810	+	12.5	0.704	intron (NM_001310760, intron 2 of 32)	intron (NM_001310760, intron 2 of 32)	-64746	NR_046043	670727	Mm.421352	NR_046043	ENSMUSG00000085751	Gm15412	OTTMUSG00000021245	predicted gene 15412	ncRNA
chr2-88	chr2	6418325	6418525	+	12.5	0.845	intron (NM_181399, intron 6 of 13)	HAL1|LINE|L1	65689	NM_181399	98910	Mm.40673	NM_181399	ENSMUSG00000039046	Usp6nl	AI316785|RNTRE|TRE2NL|mKIAA0019	USP6 N-terminal like	protein-coding
chr19-64	chr19	45046662	45046862	+	12.5	0.679	promoter-TSS (NM_001195265)	promoter-TSS (NM_001195265)	-814	NM_053197	94280	Mm.36169	NM_053197	ENSMUSG00000025212	Sfxn3	-	sideroflexin 3	protein-coding
chr2-66	chr2	73512665	73512865	+	12.5	0.828	intron (NM_153138, intron 1 of 7)	intron (NM_153138, intron 1 of 7)	16722	NM_153138	215280	Mm.223504	NM_153138	ENSMUSG00000075284	Wipf1	AI115543|D2Ertd120e|WIP|Waspip	WAS/WASL interacting protein family, member 1	protein-coding
chr8-227	chr8	71148879	71149079	+	12.5	0.823	Intergenic	L1_Mus1|LINE|L1	57969	NR_131056	330796	Mm.258257	NR_131056		Gm38415	E230016D10	predicted gene, 38415	ncRNA
chr4-79	chr4	106932647	106932847	+	12.5	0.87	intron (NM_198438, intron 4 of 16)	intron (NM_198438, intron 4 of 16)	21277	NM_023672	72475	Mm.195635	NM_023672	ENSMUSG00000061887	Ssbp3	2610021L12Rik|2610200M23Rik|5730488C10Rik|AI854733|AW551939|LAST|SSDP1	single-stranded DNA binding protein 3	protein-coding
chr16-72	chr16	11119623	11119823	+	12.5	0.74	intron (NM_029582, intron 3 of 11)	ORR1C1|LTR|ERVL-MaLR	14809	NM_029582	106200	Mm.291015	NM_029582	ENSMUSG00000022498	Txndc11	2810408E11Rik|AI427833|EFP1|Txdc11	thioredoxin domain containing 11	protein-coding
chr17-52	chr17	28524977	28525177	+	12.5	0.639	Intergenic	MTB_Mm|LTR|ERVL-MaLR	-5784	NM_026290	67645	Mm.46170	NM_026290	ENSMUSG00000024223	Armc12	4930511I11Rik|AV041658	armadillo repeat containing 12	protein-coding
chr6-139	chr6	91516039	91516239	+	12.5	0.778	promoter-TSS (NM_009531)	promoter-TSS (NM_009531)	104	NM_026309	67678	Mm.246693	NM_026309	ENSMUSG00000034192	Lsm3	1010001J12Rik|2610005D18Rik|6030401D18Rik|SMX4|USS2	LSM3 homolog, U6 small nuclear RNA and mRNA degradation associated	protein-coding
chr12-151	chr12	113285340	113285540	+	12.5	0.81	Intergenic	Intergenic	99537	NM_153776	69195	Mm.313244	NM_153776	ENSMUSG00000049036	Tmem121	2410008J05Rik|Hole	transmembrane protein 121	protein-coding
chr10-70	chr10	78091335	78091535	+	12.5	0.58	Intergenic	Intergenic	22067	NM_015790	50723	Mm.17819	NM_015790	ENSMUSG00000000732	Icosl	AU044799|B7-H2|B7RP-1|B7h|BG071784|GI50|GL50|GL50-B|ICOS-L|Icoslg|LICOS|Ly115l|mKIAA0653	icos ligand	protein-coding
chr19-33	chr19	32266915	32267115	+	12.5	0.667	intron (NM_001168525, intron 2 of 9)	intron (NM_001168525, intron 2 of 9)	-56002	NM_001168526	208449	Mm.329810	NM_144792	ENSMUSG00000040451	Sgms1	9530058O11Rik|AI841905|C80702|Mob|Sms1|Sor1|Tmem23	sphingomyelin synthase 1	protein-coding
chr4-80	chr4	107143603	107143803	+	12.5	0.73	intron (NM_025617, intron 4 of 4)	L2b|LINE|L2	34663	NM_025617	66526	Mm.246956	NM_025617	ENSMUSG00000028619	Tceanc2	2210010B22Rik|2210012G02Rik|6330404A07Rik|AU015593|Tdeanc2	transcription elongation factor A (SII) N-terminal and central domain containing 2	protein-coding
chr19-57	chr19	29366271	29366471	+	12.5	0.622	Intergenic	Intergenic	-1067	NM_021893	60533	Mm.245363	NM_021893	ENSMUSG00000016496	Cd274	A530045L16Rik|B7h1|Pdcd1l1|Pdcd1lg1|Pdl1	CD274 antigen	protein-coding
chr1-377	chr1	43241381	43241581	+	12.5	0.806	Intergenic	Intergenic	-44720	NM_001289533	14200	Mm.6799	NM_010212	ENSMUSG00000008136	Fhl2	FHL-2|SLIM-3|SLIM3	four and a half LIM domains 2	protein-coding
chr5-75	chr5	140857608	140857808	+	12.5	0.79	Intergenic	B1F1|SINE|Alu	-27277	NM_010302	14673	Mm.370185	NM_010302	ENSMUSG00000000149	Gna12	AI414047|AI504261|Galpha12	guanine nucleotide binding protein, alpha 12	protein-coding
chr18-48	chr18	12121332	12121532	+	12.5	0.889	exon (NM_178801, exon 1 of 15)	exon (NM_178801, exon 1 of 15)	105	NR_110356	338363	Mm.271567	NM_178801	ENSMUSG00000049411	Tmem241	6030446N20Rik	transmembrane protein 241	protein-coding
chrX-16	chrX	106166727	106166927	+	12.5	0.917	Intergenic	Intergenic	-20273	NM_008828	18655	Mm.316355	NM_008828	ENSMUSG00000062070	Pgk1	Pgk-1	phosphoglycerate kinase 1	protein-coding
chr6-173	chr6	148942502	148942702	+	12.5	0.906	intron (NM_019643, intron 1 of 5)	B3A|SINE|B2	3830	NM_019643	56306	Mm.18637	NM_019643	ENSMUSG00000039985	Fam60a	Ppcs1|Pptcs1|Tera	family with sequence similarity 60, member A	protein-coding
chr2-168	chr2	105313149	105313349	+	12.5	0.797	intron (NM_001159638, intron 2 of 2)	MTD|LTR|ERVL-MaLR	86070	NM_009037	19672	Mm.4876	NM_009037	ENSMUSG00000005973	Rcn1	Rcn	reticulocalbin 1	protein-coding
chr16-76	chr16	11144119	11144319	+	12.5	0.941	intron (NR_027502, intron 19 of 22)	LSU-rRNA_Hsa|rRNA|rRNA	-9687	NM_029582	106200	Mm.291015	NM_029582	ENSMUSG00000022498	Txndc11	2810408E11Rik|AI427833|EFP1|Txdc11	thioredoxin domain containing 11	protein-coding
chr5-59	chr5	142443302	142443502	+	12.5	0.709	intron (NM_199068, intron 2 of 8)	intron (NM_199068, intron 2 of 8)	-20529	NM_172725	231855	Mm.78250	NM_172725	ENSMUSG00000039623	Ap5z1	C330006K01Rik	adaptor-related protein complex 5, zeta 1 subunit	protein-coding
chr3-57	chr3	40847111	40847311	+	12.3	0.909	promoter-TSS (NM_028140)	promoter-TSS (NM_028140)	212	NR_038067	100039027	Mm.482948	NR_038067		Gm2011	-	predicted gene 2011	pseudo
chr7-70	chr7	128033008	128033208	+	12.3	0.778	Intergenic	Intergenic	28730	NM_001079932	434246	Mm.389924	NM_001079932	ENSMUSG00000042828	Trim72	BC067209|MG53	tripartite motif-containing 72	protein-coding
chr12-311	chr12	8634824	8635024	+	12.3	0.797	Intergenic	Intergenic	-35858	NM_177802	328059	Mm.46326	NM_177802	ENSMUSG00000020600	Slc7a15	Arpat	solute carrier family 7 (cationic amino acid transporter, y+ system), member 15	protein-coding
chr6-252	chr6	103314565	103314765	+	12.3	0.922	Intergenic	(TCTG)n|Simple_repeat|Simple_repeat	-196211	NM_007697	12661	Mm.251288	NM_007697	ENSMUSG00000030077	Chl1	A530023M13Rik|AI465420|CALL|LICAM2	cell adhesion molecule L1-like	protein-coding
chr1-83	chr1	39408851	39409051	+	12.3	0.8	intron (NM_018775, intron 2 of 19)	intron (NM_018775, intron 2 of 19)	41100	NM_001252218	114641	Mm.379302	NM_053257	ENSMUSG00000073702	Rpl31	Dts	ribosomal protein L31	protein-coding
chr4-141	chr4	6368944	6369144	+	12.3	0.731	intron (NM_016807, intron 1 of 8)	intron (NM_016807, intron 1 of 8)	3364	NM_001098227	53378	Mm.247473	NM_016807	ENSMUSG00000028249	Sdcbp	MDA-9|Sycl|syntenin-1	syndecan binding protein	protein-coding
chr6-134	chr6	136728251	136728451	+	12.3	0.803	exon (NM_001127318, exon 14 of 27)	exon (NM_001127318, exon 14 of 27)	53391	NM_145067	14917	Mm.222729	NM_145067	ENSMUSG00000042638	Gucy2c	AI893437|GC-C|Gcc	guanylate cyclase 2c	protein-coding
chr7-86	chr7	38090638	38090838	+	12.3	0.69	Intergenic	Intergenic	16752	NM_007633	12447	Mm.16110	NM_007633	ENSMUSG00000002068	Ccne1	AW538188|CycE1	cyclin E1	protein-coding
chr16-96	chr16	19843375	19843575	+	12.3	0.681	Intergenic	B1_Mus1|SINE|Alu	40799	NR_027896	68162	Mm.35159	NR_015488		A930003A15Rik	AI853191	RIKEN cDNA A930003A15 gene	ncRNA
chr9-89	chr9	21366640	21366840	+	12.3	0.766	Intergenic	Intergenic	-1131	NM_001042708	16201	Mm.440026	NM_010561	ENSMUSG00000032178	Ilf3	MBII-26|MPHOSPH4|NF90|NFAR	interleukin enhancer binding factor 3	protein-coding
chr18-69	chr18	51574699	51574899	+	12.3	0.79	Intergenic	Intergenic	456901	NM_001081224	71373	Mm.63546	NM_001081224	ENSMUSG00000073565	Prr16	5430406M13Rik|AI607429	proline rich 16	protein-coding
chr4-108	chr4	87996316	87996516	+	12.3	0.733	intron (NM_027326, intron 2 of 10)	intron (NM_027326, intron 2 of 10)	36991	NM_027326	70122	Mm.288898	NM_027326	ENSMUSG00000028496	Mllt3	2210011H10Rik|2610012I03Rik|3830408D16Rik|Af9|D4Ertd321e	myeloid/lymphoid or mixed-lineage leukemia; translocated to, 3	protein-coding
chrUn_GL456239-1	chrUn_GL456239	3840	4040	+	12.3	0.812	NA	Intergenic	NA	NA
chr10-117	chr10	41529882	41530082	+	12.3	0.767	3' UTR (NM_016898, exon 6 of 6)	3' UTR (NM_016898, exon 6 of 6)	10482	NM_016898	53599	Mm.269815	NM_016898	ENSMUSG00000019818	Cd164	A115|A24|AA589639|AW540279|MGC-24|MSSP	CD164 antigen	protein-coding
chr2-147	chr2	57155355	57155555	+	12.3	0.783	intron (NR_040356, intron 1 of 2)	A-rich|Low_complexity|Low_complexity	26299	NR_040356	767815	Mm.188065	NR_040356	ENSMUSG00000084938	BB557941	-	expressed sequence BB557941	ncRNA
chr12-625	chr12	41071199	41071399	+	12.3	0.873	intron (NM_053122, intron 3 of 6)	Lx5|LINE|L1	47209	NM_053122	93757	Mm.363813	NM_053122	ENSMUSG00000056899	Immp2l	AI853880|IMP2	IMP2 inner mitochondrial membrane peptidase-like (S. cerevisiae)	protein-coding
chrX-10	chrX	126693218	126693418	+	12.3	0.891	Intergenic	Intergenic	140686	NM_177705	237029	Mm.60998	NM_177705	ENSMUSG00000058670	4932411N23Rik	-	RIKEN cDNA 4932411N23 gene	protein-coding
chr7-146	chr7	107133205	107133405	+	12.3	0.839	Intergenic	ORR1D2|LTR|ERVL-MaLR	-3823	NM_146780	258776	Mm.223207	NM_146780	ENSMUSG00000060503	Olfr715	MOR260-1	olfactory receptor 715	protein-coding
chr19-73	chr19	40660767	40660967	+	12.3	0.783	intron (NM_009848, intron 1 of 9)	intron (NM_009848, intron 1 of 9)	1097	NM_009848	12495	Mm.2824	NM_009848	ENSMUSG00000048120	Entpd1	2610206B08Rik|AA408691|Cd39|NTPDase-1	ectonucleoside triphosphate diphosphohydrolase 1	protein-coding
chr10-62	chr10	43588685	43588885	+	12.3	0.671	Intergenic	MTEb-int|LTR|ERVL-MaLR	-4642	NR_033558	414125	Mm.244305	NR_033558	ENSMUSG00000075184	F830002L21Rik	F930017D23Rik	RIKEN cDNA F830002L21 gene	ncRNA
chr17-77	chr17	33033088	33033288	+	12.3	0.774	intron (NM_028543, intron 1 of 3)	intron (NM_028543, intron 1 of 3)	193	NM_028543	73451	Mm.129453	NM_028543	ENSMUSG00000067430	Zfp763	1700065O13Rik|AI839635	zinc finger protein 763	protein-coding
chr1-132	chr1	172335881	172336081	+	12.3	0.706	Intergenic	Intergenic	-5229	NM_001039484	16513	Mm.254563	NM_020269	ENSMUSG00000044708	Kcnj10	BIR10|BIRK-1|Kir1.2|Kir4.1	potassium inwardly-rectifying channel, subfamily J, member 10	protein-coding
chr3-64	chr3	93796325	93796525	+	12.3	0.828	promoter-TSS (NM_207272)	promoter-TSS (NM_207272)	27	NM_207272	399675	Mm.377924	NM_207272	ENSMUSG00000060256	Tdpoz4	-	TD and POZ domain containing 4	protein-coding
chr12-221	chr12	82472899	82473099	+	12.3	0.911	Intergenic	Intergenic	-143926	NM_001310478	50779	Mm.126176	NM_015812	ENSMUSG00000021219	Rgs6	-	regulator of G-protein signaling 6	protein-coding
chr13-73	chr13	34063585	34063785	+	12.3	0.716	intron (NM_026512, intron 5 of 6)	B1_Mus2|SINE|Alu	14323	NM_009450	22151	Mm.422827	NM_009450	ENSMUSG00000058672	Tubb2a	M(beta)2|Tubb2	tubulin, beta 2A class IIA	protein-coding
chr13-62	chr13	75957089	75957289	+	12.3	0.762	Intergenic	Intergenic	-10550	NM_029343	75571	Mm.443291	NM_029343	ENSMUSG00000021590	Spata9	1700030K01Rik|4930599C08Rik|A930023H06Rik	spermatogenesis associated 9	protein-coding
chrX-9	chrX	92465127	92465327	+	12.3	0.75	intron (NM_173783, intron 3 of 4)	intron (NM_173783, intron 3 of 4)	-24722	NM_001034103	546347	Mm.380183	NM_001034103	ENSMUSG00000071726	Gm5941	EG546347	predicted gene 5941	protein-coding
chrX-25	chrX	96207076	96207276	+	12.3	0.877	Intergenic	Lx9|LINE|L1	-32750	NR_030718	100038363	Mm.30815	NR_030718	ENSMUSG00000078122	F630028O10Rik	ENSMUSG00000065522|Gm14924|OTTMUSG00000018496|mir-223	RIKEN cDNA F630028O10 gene	ncRNA
chr1-150	chr1	75355177	75355377	+	12	0.624	Intergenic	Intergenic	-5015	NM_010043	13346	Mm.6712	NM_010043	ENSMUSG00000026208	Des	-	desmin	protein-coding
chr15-70	chr15	38561465	38561665	+	12	0.657	intron (NR_045757, intron 2 of 2)	(TG)n|Simple_repeat|Simple_repeat	33369	NR_045757	69679	Mm.416890	NR_045757	ENSMUSG00000102106	2310043O21Rik	-	RIKEN cDNA 2310043O21 gene	ncRNA
chr5-67	chr5	41427955	41428155	+	12	0.743	Intergenic	Lx2B2|LINE|L1	279636	NM_001310592	100972	Mm.41555	NM_027295	ENSMUSG00000029128	Rab28	2700023P08Rik|AW496496	RAB28, member RAS oncogene family	protein-coding
chr11-175	chr11	113544337	113544537	+	12	0.875	intron (NM_027216, intron 3 of 9)	intron (NM_027216, intron 3 of 9)	21378	NM_001166503	69806	Mm.341021	NM_027216	ENSMUSG00000041654	Slc39a11	1810074D23Rik	solute carrier family 39 (metal ion transporter), member 11	protein-coding
chr9-116	chr9	111117685	111117885	+	12	0.786	promoter-TSS (NM_027742)	promoter-TSS (NM_027742)	-326	NM_027742	71268	Mm.302287	NM_027742	ENSMUSG00000032497	Lrrfip2	5133400F20Rik|AI850587	leucine rich repeat (in FLII) interacting protein 2	protein-coding
chr9-90	chr9	32138794	32138994	+	12	0.588	intron (NM_001195632, intron 2 of 21)	RMER17C|LTR|ERVK	22758	NM_001195632	330914	Mm.46683	NM_177379	ENSMUSG00000041444	Arhgap32	3426406O18Rik|Gc-gap|Grit|Px-rics|Rics|mKIAA0712|p200Rhogap|p250Gap	Rho GTPase activating protein 32	protein-coding
chr2-74	chr2	121101283	121101483	+	12	0.607	intron (NM_001160424, intron 5 of 11)	(CCTA)n|Simple_repeat|Simple_repeat	8408	NM_001160424	640543	Mm.478785	NM_001160424	ENSMUSG00000079103	Tgm7	TGMZ|TGz	transglutaminase 7	protein-coding
chr14-64	chr14	50930159	50930359	+	12	0.69	exon (NM_001033271, exon 2 of 7)	exon (NM_001033271, exon 2 of 7)	590	NM_001310506	219024	Mm.239117	NM_001033271	ENSMUSG00000035953	Tmem55b	BC039161	transmembrane protein 55b	protein-coding
chr9-101	chr9	110681215	110681415	+	12	0.74	intron (NM_028312, intron 1 of 6)	intron (NM_028312, intron 1 of 6)	24812	NM_028312	72654	Mm.249115	NM_028312	ENSMUSG00000019659	Ccdc12	2700094L05Rik|C76605	coiled-coil domain containing 12	protein-coding
chr12-125	chr12	25352259	25352459	+	12	0.583	Intergenic	RMER10A|LTR|ERVL	223185	NR_045844	432641	Mm.112955	NR_045844		Gm17746	-	predicted gene, 17746	ncRNA
chr3-160	chr3	122923827	122924027	+	12	0.855	promoter-TSS (NM_024461)	promoter-TSS (NM_024461)	189	NR_046036	74057	Mm.159123	NR_046036	ENSMUSG00000097852	4933405D12Rik	-	RIKEN cDNA 4933405D12 gene	ncRNA
chr1-120	chr1	156702296	156702496	+	12	0.857	intron (NM_145413, intron 3 of 7)	intron (NM_145413, intron 3 of 7)	16514	NM_145413	215015	Mm.229107	NM_145413	ENSMUSG00000033557	Fam20b	C530043G21Rik|mKIAA0475	family with sequence similarity 20, member B	protein-coding
chr19-60	chr19	8937566	8937766	+	12	0.648	exon (NM_144872, exon 15 of 22)	exon (NM_144872, exon 15 of 22)	-4254	NM_011842	23942	Mm.25339	NM_011842	ENSMUSG00000071646	Mta2	AW550797|Mata1l1|Mta1l1|mmta2	metastasis-associated gene family, member 2	protein-coding
chr16-58	chr16	50732249	50732449	+	12	0.582	intron (NR_028300, intron 1 of 1)	intron (NR_028300, intron 1 of 1)	424	NR_028300	68190	Mm.139089	NR_028300		Dubr	5330426P16Rik|Dum	Dppa2 upstream binding RNA	ncRNA
chr6-207	chr6	57406226	57406426	+	12	0.887	TTS (NM_134182)	TTS (NM_134182)	1862	NM_134182	171200	Mm.377178	NM_134182	ENSMUSG00000068426	Vmn1r19	V1rc27	vomeronasal 1 receptor 19	protein-coding
chr5-119	chr5	143820802	143821002	+	12	0.769	Intergenic	Intergenic	-50960	NM_013557	15467	Mm.389709	NM_013557	ENSMUSG00000029613	Eif2ak1	HCR|Hri	eukaryotic translation initiation factor 2 alpha kinase 1	protein-coding
chr6-361	chr6	108215889	108216089	+	12	0.617	intron (NM_010585, intron 2 of 61)	intron (NM_010585, intron 2 of 61)	2893	NM_010585	16438	Mm.227912	NM_010585	ENSMUSG00000030102	Itpr1	D6Pas2|ENSMUSG00000072853|Gm10429|IP3R 1|IP3R1|InsP3R|Ip3r|Itpr-1|P400|Pcp-1|Pcp1|insP3R1|opt|wblo	inositol 1,4,5-trisphosphate receptor 1	protein-coding
chr19-90	chr19	5073720	5073920	+	12	0.78	Intergenic	Intergenic	5742	NM_054042	70445	Mm.29597	NM_054042	ENSMUSG00000056481	Cd248	2610111G01Rik|AI842296|Cd164l1|Tem1	CD248 antigen, endosialin	protein-coding
chr3-92	chr3	104860601	104860801	+	12	0.732	intron (NM_009797, intron 1 of 9)	intron (NM_009797, intron 1 of 9)	3804	NM_009797	12340	Mm.19142	NM_009797	ENSMUSG00000070372	Capza1	CAPZ|CAZ1|Cappa1	capping protein (actin filament) muscle Z-line, alpha 1	protein-coding
chr2-109	chr2	4648134	4648334	+	12	0.85	intron (NM_026045, intron 2 of 9)	intron (NM_026045, intron 2 of 9)	3852	NM_026045	67229	Mm.38529	NM_026045	ENSMUSG00000039449	Prpf18	2810441A10Rik	pre-mRNA processing factor 18	protein-coding
chr2-157	chr2	167537284	167537484	+	12	0.698	promoter-TSS (NM_011427)	promoter-TSS (NM_011427)	-843	NM_011427	20613	Mm.2093	NM_011427	ENSMUSG00000042821	Snai1	Sna|Sna1|Snail|Snail1	snail family zinc finger 1	protein-coding
chr9-197	chr9	3032452	3032652	+	12	0.653	Intergenic	GSAT_MM|Satellite|Satellite	6191	NR_039546	100628572		NR_039546	ENSMUSG00000106183	Mir101c	mir-101c|mmu-mir-101c	microRNA 101c	ncRNA
chr5-84	chr5	21254731	21254931	+	12	0.739	intron (NM_175437, intron 18 of 30)	intron (NM_175437, intron 18 of 30)	68564	NM_175437	212167	Mm.121705	NM_175437	ENSMUSG00000039934	Gsap	A530088I07Rik|Pion	gamma-secretase activating protein	protein-coding
chr2-223	chr2	52606102	52606302	+	12	0.836	intron (NM_001285426, intron 2 of 13)	L2a|LINE|L2	-47591	NM_001285427	12298	Mm.330223	NM_146123	ENSMUSG00000017412	Cacnb4	3110038O15Rik|Cchb4|lh	calcium channel, voltage-dependent, beta 4 subunit	protein-coding
chr11-186	chr11	83445112	83445312	+	12	0.753	intron (NM_172797, intron 4 of 7)	MIR|SINE|MIR	7518	NM_025492	66330	Mm.44800	NM_025492	ENSMUSG00000035085	1700020L24Rik	-	RIKEN cDNA 1700020L24 gene	protein-coding
chr9-66	chr9	108078544	108078744	+	12	0.616	intron (NM_032543, intron 1 of 38)	intron (NM_032543, intron 1 of 38)	657	NM_001311152	84585	Mm.379272	NM_032543	ENSMUSG00000041528	Rnf123	BC003945|Kpc1	ring finger protein 123	protein-coding
chr19-49	chr19	5447513	5447713	+	12	0.831	promoter-TSS (NM_010235)	promoter-TSS (NM_010235)	-85	NM_010235	14283	Mm.6215	NM_010235	ENSMUSG00000024912	Fosl1	AW538199|Fra1|fra-1	fos-like antigen 1	protein-coding
chr17-65	chr17	3174531	3174731	+	12	0.73	intron (NM_134123, intron 9 of 19)	intron (NM_134123, intron 9 of 19)	59659	NM_134123	106583	Mm.124373	NM_134123	ENSMUSG00000046201	Scaf8	A630086M08Rik|A930036P18Rik|AA408306|AI447644|AI448652|AU015035|Rbm16|mKIAA1116	SR-related CTD-associated factor 8	protein-coding
chr14-87	chr14	121516943	121517143	+	12	0.754	Intergenic	MTEa|LTR|ERVL-MaLR	-11789	NM_053079	56643	Mm.155618	NM_053079	ENSMUSG00000025557	Slc15a1	D630032F02|PECT1|PEPT1	solute carrier family 15 (oligopeptide transporter), member 1	protein-coding
chr8-341	chr8	117087073	117087273	+	12	0.887	Intergenic	MTEa|LTR|ERVL-MaLR	-4724	NM_029686	76645	Mm.159753	NM_029686	ENSMUSG00000034416	Pkd1l2	1700126L06Rik	polycystic kidney disease 1 like 2	protein-coding
chr18-50	chr18	32134029	32134229	+	12	0.831	intron (NM_001042768, intron 4 of 9)	B2_Mm2|SINE|B2	4076	NM_008934	19123	Mm.2786	NM_008934	ENSMUSG00000024386	Proc	PC	protein C	protein-coding
chr4-166	chr4	137835748	137835948	+	12	0.762	Intergenic	Intergenic	-26389	NM_199307	230857	Mm.401062	NM_199307	ENSMUSG00000057530	Ece1	AW322500|ECE-1|ECE-1a|ECE-1b|ECE-1d	endothelin converting enzyme 1	protein-coding
chr4-101	chr4	147335803	147336003	+	12	0.697	intron (NM_001039209, intron 1 of 2)	intron (NM_001039209, intron 1 of 2)	160037	NM_001039209	195531	Mm.270762	NM_001039209	ENSMUSG00000078496	Zfp982	Gm13152|OTTMUSG00000010671	zinc finger protein 982	protein-coding
chr12-199	chr12	40348813	40349013	+	12	0.701	intron (NM_178845, intron 4 of 11)	intron (NM_178845, intron 4 of 11)	96877	NM_172575	246196	Mm.26852	NM_172575	ENSMUSG00000055917	Zfp277	2410017E24Rik|NIRF4	zinc finger protein 277	protein-coding
chr17-74	chr17	45506702	45506902	+	12	0.86	promoter-TSS (NM_198608)	promoter-TSS (NM_198608)	-39	NM_198608	224805	Mm.329063	NM_198608	ENSMUSG00000023938	Aars2	Aarsl|AlaRS|Gm89	alanyl-tRNA synthetase 2, mitochondrial	protein-coding
chr14-30	chr14	55728347	55728547	+	12	0.8	Intergenic	Intergenic	-6271	NM_019519	56187	Mm.87216	NM_019519	ENSMUSG00000040472	Rabggta	gm	Rab geranylgeranyl transferase, a subunit	protein-coding
chr9-107	chr9	50966082	50966282	+	12	0.845	intron (NM_178710, intron 3 of 15)	intron (NM_178710, intron 3 of 15)	42891	NM_178710	235344	Mm.104932	NM_178710	ENSMUSG00000037112	Sik2	G630080D20Rik|Snf1lk2	salt inducible kinase 2	protein-coding
chr18-60	chr18	73615197	73615397	+	12	0.904	Intergenic	Intergenic	42592	NM_001039214	240396	Mm.24131	NM_001039214	ENSMUSG00000037253	Mex3c	A130001D14Rik|BC035207|BM-013|Rkhd2	mex3 RNA binding family member C	protein-coding
chr6-185	chr6	124733159	124733359	+	12	0.647	promoter-TSS (NM_013545)	promoter-TSS (NM_013545)	-105	NM_013545	15170	Mm.271799	NM_013545	ENSMUSG00000004266	Ptpn6	70Z-SHP|Hcph|PTPTY-42|Ptp1C|SH-PTP1|SHP-1|hcp|me	protein tyrosine phosphatase, non-receptor type 6	protein-coding
chr11-105	chr11	95896953	95897153	+	12	0.727	intron (NM_008081, intron 1 of 10)	intron (NM_008081, intron 1 of 10)	17818	NM_008081	14422	Mm.340702	NM_008081	ENSMUSG00000013418	B4galnt2	AI593864|Dlb-1|Dlb1|Galg2|Galgt2|Ggm3|Igf2bp1	beta-1,4-N-acetyl-galactosaminyl transferase 2	protein-coding
chr11-259	chr11	117670227	117670427	+	12	0.719	intron (NM_198022, intron 1 of 21)	B2_Mm2|SINE|B2	16038	NM_198022	217351	Mm.40272	NM_198022	ENSMUSG00000025571	Tnrc6c	9930033H14Rik|mKIAA1582	trinucleotide repeat containing 6C	protein-coding
chr9-65	chr9	88546319	88546519	+	12	0.804	Intergenic	MLT1F2|LTR|ERVL-MaLR	-1601	NM_001142943	71640	Mm.259988	NM_001142943	ENSMUSG00000032425	Zfp949	4930422I07Rik	zinc finger protein 949	protein-coding
chr11-162	chr11	34694846	34695046	+	12	0.78	intron (NM_033374, intron 17 of 51)	MTD|LTR|ERVL-MaLR	88959	NM_033374	94176	Mm.380679	NM_033374	ENSMUSG00000020143	Dock2	AI662014|AW122239|CED-5|Hch|MBC	dedicator of cyto-kinesis 2	protein-coding
chr10-81	chr10	80576671	80576871	+	12	0.958	exon (NM_078477, exon 1 of 2)	exon (NM_078477, exon 1 of 2)	525	NM_078477	118445	Mm.41513	NM_078477	ENSMUSG00000035397	Klf16	AI843742|BTEB4|DRRF	Kruppel-like factor 16	protein-coding
chr9-138	chr9	16312508	16312708	+	11.7	0.657	intron (NM_001080814, intron 1 of 24)	intron (NM_001080814, intron 1 of 24)	65623	NM_001080814	270120	Mm.195010	NM_001080814	ENSMUSG00000074505	Fat3	9430076A06Rik|D430038H04Rik|Gm1132|Gm510|MFAT3F	FAT atypical cadherin 3	protein-coding
chr10-101	chr10	59223949	59224149	+	11.7	0.767	3' UTR (NM_172939, exon 1 of 1)	3' UTR (NM_172939, exon 1 of 1)	2127	NM_172939	268301	Mm.3036	NM_172939	ENSMUSG00000098188	Sowahc	4921515A04Rik|9430099J10Rik|Ankrd57|C820004L04Rik	sosondowah ankyrin repeat domain family member C	protein-coding
chr6-133	chr6	128522577	128522777	+	11.7	0.699	intron (NM_007376, intron 5 of 35)	intron (NM_007376, intron 5 of 35)	4043	NM_007376	11287	Mm.260144	NM_007376	ENSMUSG00000030359	Pzp	A1m|A2m|AI893533|MAM	pregnancy zone protein	protein-coding
chr19-143	chr19	3929670	3929870	+	11.7	0.714	promoter-TSS (NM_026316)	promoter-TSS (NM_026316)	-54	NM_026316	67689	Mm.109341	NM_026316	ENSMUSG00000024885	Aldh3b1	1700001N19Rik|ALDH4|ALDH7	aldehyde dehydrogenase 3 family, member B1	protein-coding
chr7-85	chr7	144942325	144942525	+	11.7	0.708	Intergenic	CpG	-2500	NM_007631	12443	Mm.273049	NM_007631	ENSMUSG00000070348	Ccnd1	AI327039|CycD1|Cyl-1|PRAD1|bcl-1|cD1	cyclin D1	protein-coding
chr14-101	chr14	16538927	16539127	+	11.7	0.794	intron (NM_001289760, intron 4 of 9)	L1_Mus1|LINE|L1	36449	NM_011243	218772	Mm.259318	NM_011243	ENSMUSG00000017491	Rarb	A830025K23|Hap|Nr1b2	retinoic acid receptor, beta	protein-coding
chr3-81	chr3	109747727	109747927	+	11.7	0.77	Intergenic	L3|LINE|CR1	173820	NM_146139	57257	Mm.282257	NM_020505	ENSMUSG00000033721	Vav3	A530094I06Rik|AA986410|Idd18.1	vav 3 oncogene	protein-coding
chr16-55	chr16	33693742	33693942	+	11.7	0.797	intron (NM_175256, intron 1 of 14)	MTD|LTR|ERVL-MaLR	9376	NM_175256	77446	Mm.245741	NM_172934	ENSMUSG00000075254	Heg1	4632417D23Rik|5530401I02Rik|9530025L16Rik|BC038614|Gm629|OTTMUSG00000027315	heart development protein with EGF-like domains 1	protein-coding
chr13-65	chr13	13539532	13539732	+	11.7	0.671	Intergenic	RLTR10D|LTR|ERVK	-50777	NM_010748	17101	Mm.342337	NM_010748	ENSMUSG00000019726	Lyst	D13Sfk13|beige|bg	lysosomal trafficking regulator	protein-coding
chr2-161	chr2	39016910	39017110	+	11.7	0.875	non-coding (NR_110968, exon 24 of 24)	non-coding (NR_110968, exon 24 of 24)	8871	NM_028809	74192	Mm.38155	NM_028809	ENSMUSG00000026755	Arpc5l	2010015J01Rik|AI852867|ARC16-2|AW555592|AW742746	actin related protein 2/3 complex, subunit 5-like	protein-coding
chr1-73	chr1	165709649	165709849	+	11.7	0.56	Intergenic	Intergenic	-1655	NM_001038846	226594	Mm.265552	NM_178593	ENSMUSG00000040723	Rcsd1	A430105K13Rik|BC025872|CapZIP	RCSD domain containing 1	protein-coding
chr5-96	chr5	138534450	138534650	+	11.7	0.676	Intergenic	L1_Mus4|LINE|L1	30144	NM_029693	76658	Mm.73235	NM_029693	ENSMUSG00000029526	1700123K08Rik	-	RIKEN cDNA 1700123K08 gene	protein-coding
chr16-75	chr16	33691467	33691667	+	11.7	0.836	intron (NM_175256, intron 1 of 14)	intron (NM_175256, intron 1 of 14)	7101	NM_175256	77446	Mm.245741	NM_172934	ENSMUSG00000075254	Heg1	4632417D23Rik|5530401I02Rik|9530025L16Rik|BC038614|Gm629|OTTMUSG00000027315	heart development protein with EGF-like domains 1	protein-coding
chr13-72	chr13	32849918	32850118	+	11.7	0.768	intron (NM_025429, intron 2 of 6)	intron (NM_025429, intron 2 of 6)	1167	NM_025429	66222	Mm.20144	NM_025429	ENSMUSG00000044734	Serpinb1a	1190005M04Rik|AI325983|EI|EIA|ELANH2|LEI|M/NEI|MNEI|PI2	serine (or cysteine) peptidase inhibitor, clade B, member 1a	protein-coding
chr12-321	chr12	45092249	45092449	+	11.7	0.797	Intergenic	Intergenic	-17866	NM_144552	217517	Mm.285400	NM_144552	ENSMUSG00000046314	Stxbp6	BC024598|C85317	syntaxin binding protein 6 (amisyn)	protein-coding
chr4-120	chr4	41755033	41755233	+	11.7	0.644	promoter-TSS (NM_016658)	promoter-TSS (NM_016658)	-95	NM_016658	14430	Mm.439669	NM_016658	ENSMUSG00000036073	Galt	AW553376	galactose-1-phosphate uridyl transferase	protein-coding
chr10-100	chr10	42269736	42269936	+	11.7	0.742	intron (NM_019740, intron 2 of 3)	intron (NM_019740, intron 2 of 3)	6906	NM_019740	56484	Mm.338613	NM_019740	ENSMUSG00000048756	Foxo3	1110048B16Rik|2010203A17Rik|C76856|FKHRL1|Fkhr2|Foxo3a	forkhead box O3	protein-coding
chr11-127	chr11	116088966	116089166	+	11.7	0.812	Intergenic	Intergenic	-2102	NM_016852	22378	Mm.284792	NM_016852	ENSMUSG00000034341	Wbp2	-	WW domain binding protein 2	protein-coding
chr4-104	chr4	34429909	34430109	+	11.7	0.839	Intergenic	Intergenic	-120606	NM_001007589	433693	Mm.389532	NM_026019	ENSMUSG00000028291	Akirin2	2700059D21Rik|AA114675|AA522011|AU019887|Akirin-2	akirin 2	protein-coding
chr2-247	chr2	38345535	38345735	+	11.7	0.746	intron (NM_001290646, intron 1 of 4)	intron (NM_001290646, intron 1 of 4)	-5673	NM_010710	16870	Mm.142856	NM_010710	ENSMUSG00000000247	Lhx2	LH2A|Lh-2|Lim2|ap|apterous	LIM homeobox protein 2	protein-coding
chr6-120	chr6	122975765	122975965	+	11.7	0.776	Intergenic	L1Md_F|LINE|L1	-14502	NM_001005860	474145	Mm.263483	NM_001005860	ENSMUSG00000059639	Clec4a4	Dcir2	C-type lectin domain family 4, member a4	protein-coding
chr19-59	chr19	3942268	3942468	+	11.7	0.725	exon (NM_001161428, exon 6 of 10)	exon (NM_001161428, exon 6 of 10)	7182	NM_001161428	54445	Mm.262094	NM_019449	ENSMUSG00000036908	Unc93b1	Unc-93B1|Unc93b	unc-93 homolog B1 (C. elegans)	protein-coding
chr10-84	chr10	77568584	77568784	+	11.7	0.857	Intergenic	RMER17C2|LTR|ERVK	-13083	NM_145925	108705	Mm.28853	NM_145925	ENSMUSG00000009291	Pttg1ip	1810010L20Rik|AI314311|AU018448|C79540	pituitary tumor-transforming 1 interacting protein	protein-coding
chr17-103	chr17	24351554	24351754	+	11.7	0.6	promoter-TSS (NM_013855)	promoter-TSS (NM_013855)	-369	NM_013855	27410	Mm.239470	NM_013855	ENSMUSG00000024130	Abca3	1810036E22Rik|ABC-C|Abc3	ATP-binding cassette, sub-family A (ABC1), member 3	protein-coding
chr2-64	chr2	119344854	119345054	+	11.7	0.781	Intergenic	Intergenic	-6288	NM_026929	69065	Mm.35083	NM_026929	ENSMUSG00000027313	Chac1	1810008K03Rik	ChaC, cation transport regulator 1	protein-coding
chr6-219	chr6	136735420	136735620	+	11.7	0.787	intron (NM_001127318, intron 12 of 26)	CT-rich|Low_complexity|Low_complexity	46222	NM_145067	14917	Mm.222729	NM_145067	ENSMUSG00000042638	Gucy2c	AI893437|GC-C|Gcc	guanylate cyclase 2c	protein-coding
chr10-77	chr10	128821994	128822194	+	11.7	0.746	promoter-TSS (NM_024180)	promoter-TSS (NM_024180)	323	NM_025364	66118	Mm.235562	NM_025364	ENSMUSG00000078427	Sarnp	1110005A23Rik|Cip29	SAP domain containing ribonucleoprotein	protein-coding
chr15-61	chr15	76818285	76818485	+	11.7	0.939	promoter-TSS (NM_001168288)	promoter-TSS (NM_001168288)	-215	NM_198420	223666	Mm.322931	NM_198420	ENSMUSG00000033697	Arhgap39	9530053N22|AI843066|D15Wsu169e|Kiaa1688|Porf-2	Rho GTPase activating protein 39	protein-coding
chr17-140	chr17	65961850	65962050	+	11.7	0.69	Intergenic	Intergenic	-10763	NM_023053	65960	Mm.10153	NM_023053	ENSMUSG00000024098	Twsg1	1810013J15Rik|9030422N06Rik|AW552143|D17Ertd403e|Tsg|Twg	twisted gastrulation BMP signaling modulator 1	protein-coding
chr18-74	chr18	12947537	12947737	+	11.7	0.842	Intergenic	Intergenic	-5796	NM_207530	64291	Mm.259470	NM_020573	ENSMUSG00000044252	Osbpl1a	G430090F17Rik|Gm753|ORP-1|Osbpl1b	oxysterol binding protein-like 1A	protein-coding
chr15-83	chr15	82898682	82898882	+	11.7	0.885	promoter-TSS (NR_027799)	promoter-TSS (NR_027799)	-298	NR_045068	100504637	Mm.440928	NR_045068	ENSMUSG00000100199	Gm20324	-	predicted gene, 20324	ncRNA
chr12-137	chr12	21080979	21081179	+	11.7	0.738	Intergenic	Intergenic	-30677	NM_001004364	211914	Mm.358946	NM_001004364	ENSMUSG00000052632	Asap2	6530401G17Rik|Ddef2|Gm1523|Gm592|PAG3|PAP	ArfGAP with SH3 domain, ankyrin repeat and PH domain 2	protein-coding
chr10-277	chr10	22732210	22732410	+	11.7	0.873	promoter-TSS (NM_011603)	promoter-TSS (NM_011603)	-863	NM_011603	237336	Mm.86670	NM_011603	ENSMUSG00000071359	Tbpl1	4732475G08|AW011832|AW491032|D18347|STD|TLF|TRF2|TRP|Tlp	TATA box binding protein-like 1	protein-coding
chr12-209	chr12	102721297	102721497	+	11.7	0.75	Intergenic	Intergenic	-16528	NM_172584	217837	Mm.482192	NM_172584	ENSMUSG00000057963	Itpk1	BC031182	inositol 1,3,4-triphosphate 5/6 kinase	protein-coding
chr8-117	chr8	109869437	109869637	+	11.7	0.895	intron (NM_001122594, intron 1 of 18)	intron (NM_001122594, intron 1 of 18)	934	NM_001122594	244650	Mm.23494	NM_001122594	ENSMUSG00000031732	Phlpp2	AI481772|C130044A18Rik|Phlppl	PH domain and leucine rich repeat protein phosphatase 2	protein-coding
chr6-223	chr6	47184919	47185119	+	11.7	0.746	intron (NM_001004357, intron 20 of 23)	MIR3|SINE|MIR	-59377	NM_025771	66797	Mm.440084	NM_025771	ENSMUSG00000039419	Cntnap2	5430425M22Rik|Caspr2|mKIAA0868	contactin associated protein-like 2	protein-coding
chr9-85	chr9	54084236	54084436	+	11.7	0.639	Intergenic	Intergenic	-15925	NM_001033535	244882	Mm.325589	NM_001033535	ENSMUSG00000074345	Tnfaip8l3	9930029P06Rik|Gm517	tumor necrosis factor, alpha-induced protein 8-like 3	protein-coding
chr4-97	chr4	137528601	137528801	+	11.7	0.714	intron (NM_008305, intron 33 of 96)	intron (NM_008305, intron 33 of 96)	-9585	NR_105985	102465616		NR_105985	ENSMUSG00000099134	Mir7018	Gm27606|mmu-mir-7018	microRNA 7018	ncRNA
chr14-166	chr14	51205864	51206064	+	11.7	0.833	Intergenic	L1Md_F2|LINE|L1	2269	NM_017389	503847	Mm.377124	NM_017389	ENSMUSG00000050766	Ear14	-	eosinophil-associated, ribonuclease A family, member 14	protein-coding
chr1-215	chr1	190910811	190911011	+	11.7	0.684	intron (NM_178775, intron 1 of 14)	intron (NM_178775, intron 1 of 14)	859	NM_178775	320119	Mm.220912	NM_178775	ENSMUSG00000089872	Rps6kc1	AA682037|B130003F20Rik|C80612|Rpk118	ribosomal protein S6 kinase polypeptide 1	protein-coding
chr14-96	chr14	65006125	65006325	+	11.5	0.797	intron (NM_153414, intron 6 of 16)	intron (NM_153414, intron 6 of 16)	56180	NM_001253731	210925	Mm.71332	NM_153414	ENSMUSG00000021975	Ints9	BC028953|D14Ertd231e	integrator complex subunit 9	protein-coding
chr12-691	chr12	109521366	109521566	+	11.5	0.778	Intergenic	L1MEc|LINE|L1	-19530	NR_027652	17263	Mm.289645	NM_144513	ENSMUSG00000021268	Meg3	2900016C05Rik|3110050O07Rik|6330408G06Rik|AI425946|AW108224|D12Bwg1266e|Gtl2|R74756|R75394	maternally expressed 3	ncRNA
chr15-86	chr15	5243618	5243818	+	11.5	0.675	5' UTR (NM_008965, exon 1 of 3)	5' UTR (NM_008965, exon 1 of 3)	469	NM_001136079	19219	Mm.18509	NM_008965	ENSMUSG00000039942	Ptger4	EP4|Ptgerep4	prostaglandin E receptor 4 (subtype EP4)	protein-coding
chr4-109	chr4	94974957	94975157	+	11.5	0.836	intron (NM_177239, intron 2 of 19)	intron (NM_177239, intron 2 of 19)	4043	NM_177239	320713	Mm.208868	NM_177239	ENSMUSG00000062627	Mysm1	C130067A03Rik|C530050H10Rik	myb-like, SWIRM and MPN domains 1	protein-coding
chr7-98	chr7	101091417	101091617	+	11.5	0.672	Intergenic	Intergenic	-17258	NM_001146010	207278	Mm.263041	NM_199012	ENSMUSG00000030691	Fchsd2	BC034086|R74866|Sh3md3|mKIAA0769	FCH and double SH3 domains 2	protein-coding
chr11-252	chr11	77169232	77169432	+	11.5	0.814	intron (NM_176965, intron 2 of 17)	intron (NM_176965, intron 2 of 17)	19636	NM_176965	319634	Mm.108786	NM_176965	ENSMUSG00000050944	Efcab5	4930563A03Rik	EF-hand calcium binding domain 5	protein-coding
chr19-86	chr19	40661389	40661589	+	11.5	0.658	intron (NM_009848, intron 1 of 9)	(TC)n|Simple_repeat|Simple_repeat	1719	NM_009848	12495	Mm.2824	NM_009848	ENSMUSG00000048120	Entpd1	2610206B08Rik|AA408691|Cd39|NTPDase-1	ectonucleoside triphosphate diphosphohydrolase 1	protein-coding
chr2-142	chr2	14244307	14244507	+	11.5	0.776	intron (NM_008625, intron 3 of 29)	ID4|SINE|ID	14993	NM_008625	17533	Mm.2019	NM_008625	ENSMUSG00000026712	Mrc1	AW259686|CD206|MR	mannose receptor, C type 1	protein-coding
chr18-95	chr18	40439622	40439822	+	11.5	0.778	intron (NM_026135, intron 1 of 1)	intron (NM_026135, intron 1 of 1)	181361	NM_026135	383348	Mm.76366	NM_026135	ENSMUSG00000051401	Kctd16	4930434H12Rik|Gm1267	potassium channel tetramerisation domain containing 16	protein-coding
chr18-85	chr18	38297637	38297837	+	11.5	0.722	intron (NM_001164621, intron 2 of 9)	intron (NM_001164621, intron 2 of 9)	932	NM_001164621	56736	Mm.228903	NM_020012	ENSMUSG00000060450	Rnf14	2310075C09Rik|2610005D23Rik|AA986456|AU041447|D18Ertd188e|D7Bwg0165e|Triad2	ring finger protein 14	protein-coding
chr13-89	chr13	100616166	100616366	+	11.5	0.692	TTS (NM_001283011)	TTS (NM_001283011)	678	NM_178410	218518	Mm.25300	NM_178410	ENSMUSG00000021636	Marveld2	BC003296|MARVD2|Mrvldc2|Tric|Trica|Tricb|Tricc	MARVEL (membrane-associating) domain containing 2	protein-coding
chr11-231	chr11	81950782	81950982	+	11.5	0.708	intron (NM_001034013, intron 1 of 9)	L1MB8|LINE|L1	17514	NM_001034013	11418	Mm.234998	NM_007384	ENSMUSG00000020704	Asic2	ACIC2|Accn1|BNC1|BNaC1|BNaC1a|Mdeg	acid-sensing (proton-gated) ion channel 2	protein-coding
chr5-58	chr5	126843475	126843675	+	11.5	0.727	Intergenic	(GGA)n|Simple_repeat|Simple_repeat	-187214	NR_040685	71247	Mm.399586	NR_040685	ENSMUSG00000105490	4933438B17Rik	-	RIKEN cDNA 4933438B17 gene	ncRNA
chr7-94	chr7	75868623	75868823	+	11.5	0.75	intron (NM_001122780, intron 2 of 2)	intron (NM_001122780, intron 2 of 2)	20385	NM_029652	207952	Mm.206223	NM_029652	ENSMUSG00000055652	Klhl25	2810402K13Rik|BC027373|Enc-1	kelch-like 25	protein-coding
chr3-127	chr3	109079676	109079876	+	11.5	0.804	promoter-TSS (NM_029054)	promoter-TSS (NM_029054)	-723	NM_029054	74686	Mm.307948	NM_029054	ENSMUSG00000027880	Slc25a54	4930443G12Rik|SCaMC-1like	solute carrier family 25, member 54	protein-coding
chr18-72	chr18	6732835	6733035	+	11.5	0.83	Intergenic	Intergenic	-32232	NM_181070	19330	Mm.132802	NM_181070	ENSMUSG00000073639	Rab18	AA959686	RAB18, member RAS oncogene family	protein-coding
chr14-80	chr14	51979380	51979580	+	11.5	0.769	Intergenic	MT2A|LTR|ERVL	-5353	NM_001145921	268739	Mm.9239	NM_198249	ENSMUSG00000004562	Arhgef40	E130112L23Rik|Gm669|Solo	Rho guanine nucleotide exchange factor (GEF) 40	protein-coding
chr4-81	chr4	112283213	112283413	+	11.5	0.685	intron (NM_001102474, intron 8 of 9)	BGLII|LTR|ERVK	50892	NM_001102474	195564	Mm.259652	NM_177578	ENSMUSG00000070868	Skint3	A430090E18Rik|Skint-3	selection and upkeep of intraepithelial T cells 3	protein-coding
chr16-126	chr16	48873778	48873978	+	11.5	0.825	intron (NM_181596, intron 3 of 3)	intron (NM_181596, intron 3 of 3)	1270	NM_181596	245195	Mm.231288	NM_181596	ENSMUSG00000022651	Retnlg	Fizz3|Relmg|Xcp1	resistin like gamma	protein-coding
chr1-210	chr1	177007626	177007826	+	11.5	0.815	intron (NM_029756, intron 16 of 17)	ORR1B1-int|LTR|ERVL-MaLR	-171593	NR_037996	15365	Mm.441435	NR_037996		Hmga2-ps1	EG666235|Gm7996|Hmgic-ps1|[y]i-c	high mobility group AT-hook 2, pseudogene 1	pseudo
chr3-85	chr3	86993339	86993539	+	11.5	0.797	Intergenic	Intergenic	5901	NM_007639	12479	Mm.1894	NM_007639	ENSMUSG00000028076	Cd1d1	AI747460|CD1.1|Cd1a|Cd1d|Ly-38	CD1d1 antigen	protein-coding
chr1-90	chr1	37299592	37299792	+	11.5	0.742	promoter-TSS (NM_030266)	promoter-TSS (NM_030266)	-146	NM_030266	269180	Mm.5294	NM_030266	ENSMUSG00000026113	Inpp4a	107kDa|9630012D15|D130048C09Rik|R74740	inositol polyphosphate-4-phosphatase, type I	protein-coding
chr11-103	chr11	82870757	82870957	+	11.5	0.81	promoter-TSS (NM_001164570)	promoter-TSS (NM_001164570)	-113	NM_001164570	67338	Mm.341608	NM_026097	ENSMUSG00000020696	Rffl	1700051E09Rik|4930516L10Rik|BG080975|Carp2	ring finger and FYVE like domain containing protein	protein-coding
chr7-161	chr7	99175217	99175417	+	11.5	0.772	intron (NM_026384, intron 1 of 7)	MIRb|SINE|MIR	7396	NM_026384	67800	Mm.180189	NM_026384	ENSMUSG00000030747	Dgat2	0610010B06Rik|ARAT|DGAT-2	diacylglycerol O-acyltransferase 2	protein-coding
chr13-336	chr13	99138452	99138652	+	11.5	0.88	Intergenic	MLT2C2|LTR|ERVL	-46271	NM_001004149	238803	Mm.343207	NM_001004149	ENSMUSG00000050919	Zfp366	DC-SCRIPT|Znf366	zinc finger protein 366	protein-coding
chr5-224	chr5	135106601	135106801	+	11.5	0.882	promoter-TSS (NM_021455)	promoter-TSS (NM_021455)	-190	NM_021455	58805	Mm.34213	NM_021455	ENSMUSG00000005373	Mlxipl	ChREBP|Mlx|WS-bHLH|Wbscr14|bHLHd14	MLX interacting protein-like	protein-coding
chr10-141	chr10	71356248	71356448	+	11.5	0.9	intron (NM_027184, intron 1 of 5)	L1MC4|LINE|L1	8555	NM_027184	69718	Mm.245867	NM_027184	ENSMUSG00000060733	Ipmk	2410017C19Rik|AA408208|Impk	inositol polyphosphate multikinase	protein-coding
chr5-148	chr5	4179355	4179555	+	11.5	0.689	Intergenic	ORR1D1|LTR|ERVL-MaLR	-12912	NM_001042670	208595	Mm.129815	NM_001042670	ENSMUSG00000053178	Mterf1b	ENSMUSG00000053178|Gm9897	mitochondrial transcription termination factor 1b	protein-coding
chr12-226	chr12	3657630	3657830	+	11.5	0.757	intron (NR_027869, intron 8 of 20)	intron (NR_027869, intron 8 of 20)	84689	NM_007886	13528	Mm.286202	NM_007886	ENSMUSG00000071454	Dtnb	-	dystrobrevin, beta	protein-coding
chr16-109	chr16	30968149	30968349	+	11.5	0.828	intron (NM_198626, intron 3 of 3)	intron (NM_198626, intron 3 of 3)	113183	NM_198626	268880	Mm.286693	NM_198626	ENSMUSG00000047434	Xxylt1	AI480653	xyloside xylosyltransferase 1	protein-coding
chr5-98	chr5	25530066	25530266	+	11.5	0.904	non-coding (NR_027388, exon 1 of 1)	non-coding (NR_027388, exon 1 of 1)	148	NR_027388	73571	Mm.105263	NR_027388	ENSMUSG00000101856	1700096K18Rik	-	RIKEN cDNA 1700096K18 gene	ncRNA
chr8-290	chr8	102187050	102187250	+	11.5	0.746	Intergenic	Intergenic	597961	NM_009866	12552	Mm.1571	NM_009866	ENSMUSG00000031673	Cdh11	Cad11|OSF-4	cadherin 11	protein-coding
chr12-250	chr12	51844597	51844797	+	11.5	0.734	Intergenic	Intergenic	-15161	NM_144788	207304	Mm.249391	NM_144788	ENSMUSG00000035247	Hectd1	A630086P08Rik|AI844876|b2b327Clo|opm	HECT domain containing 1	protein-coding
chr12-259	chr12	119781469	119781669	+	11.5	0.786	Intergenic	L1Md_F2|LINE|L1	-164393	NM_001294154	217951	Mm.387395	NM_001160385	ENSMUSG00000048004	Tmem196	Gm528	transmembrane protein 196	protein-coding
chr1-389	chr1	80718811	80719011	+	11.5	0.88	intron (NM_175291, intron 1 of 55)	intron (NM_175291, intron 1 of 55)	39642	NM_175291	210293	Mm.133473	NM_175291	ENSMUSG00000038608	Dock10	9330153B10Rik|A630054M16Rik|Jr4|Jr5|R75174|ZIZ3|Zizimin3|mKIAA0694	dedicator of cytokinesis 10	protein-coding
chr7-123	chr7	88252105	88252305	+	11.5	0.685	Intergenic	Lx5|LINE|L1	-25880	NM_009982	13032	Mm.89295	NM_009982	ENSMUSG00000030560	Ctsc	AI047818|CatC|DPP1|DPPI	cathepsin C	protein-coding
chr13-138	chr13	11908154	11908354	+	11.5	0.758	intron (NM_023868, intron 3 of 104)	intron (NM_023868, intron 3 of 104)	198691	NM_023868	20191	Mm.239871	NM_023868	ENSMUSG00000021313	Ryr2	9330127I20Rik|RYR-2	ryanodine receptor 2, cardiac	protein-coding
chr2-108	chr2	180556543	180556743	+	11.5	0.842	Intergenic	Intergenic	-24661	NM_028479	73247	Mm.426558	NM_028479	ENSMUSG00000027569	Mrgbp	1600027N09Rik|AW060503|C80444	MRG/MORF4L binding protein	protein-coding
chr1-98	chr1	74850788	74850988	+	11.5	0.766	Intergenic	Intergenic	-4141	NM_009872	12570	Mm.153833	NM_009872	ENSMUSG00000090071	Cdk5r2	B230310J22Rik|p39	cyclin-dependent kinase 5, regulatory subunit 2 (p39)	protein-coding
chr18-94	chr18	32361514	32361714	+	11.5	0.849	intron (NR_045403, intron 2 of 2)	intron (NR_045403, intron 2 of 2)	-15603	NM_001083334	30948	Mm.4383	NM_009668	ENSMUSG00000024381	Bin1	ALP-1|Amphl|BRAMP-2|SH3P9	bridging integrator 1	protein-coding
chr10-291	chr10	68860771	68860971	+	11.5	0.917	Intergenic	B3|SINE|B2	137125	NM_177794	327766	Mm.2479	NM_177794	ENSMUSG00000060044	Tmem26	3230401A06|AI195372	transmembrane protein 26	protein-coding
chr4-93	chr4	59259976	59260176	+	11.5	0.754	promoter-TSS (NR_105031)	promoter-TSS (NR_105031)	25	NR_105031	101055769	Mm.421401	NR_105031		Gm12596	OTTMUSG00000007649	predicted gene 12596	ncRNA
chr6-184	chr6	113455178	113455378	+	11.5	0.75	Intergenic	Intergenic	-3206	NM_145826	57890	Mm.131781	NM_145826	ENSMUSG00000043088	Il17re	AA589509|IL-17RE|Il25r	interleukin 17 receptor E	protein-coding
chr2-479	chr2	57083407	57083607	+	11.5	0.957	Intergenic	Lx4A|LINE|L1	31531	NM_013613	18227	Mm.3507	NM_013613	ENSMUSG00000026826	Nr4a2	HZF-3|NOT|Nurr1|RNR-1|TINOR|TINUR	nuclear receptor subfamily 4, group A, member 2	protein-coding
chr14-112	chr14	121987565	121987765	+	11.5	0.746	intron (NM_026861, intron 6 of 8)	(GA)n|Simple_repeat|Simple_repeat	-22472	NM_183031	321019	Mm.265618	NM_183031	ENSMUSG00000051212	Gpr183	Ebi2	G protein-coupled receptor 183	protein-coding
chr9-77	chr9	44435826	44436026	+	11.5	0.806	exon (NM_001033469, exon 3 of 5)	exon (NM_001033469, exon 3 of 5)	4942	NM_001033469	382074	Mm.335103	NM_001033469	ENSMUSG00000074397	Foxr1	Foxn5|Gm1115	forkhead box R1	protein-coding
chr10-74	chr10	111413321	111413521	+	11.5	0.807	Intergenic	Intergenic	-59771	NM_015781	53605	Mm.290407	NM_015781	ENSMUSG00000058799	Nap1l1	AA407126|AI256722|D10Ertd68e|NAP-1	nucleosome assembly protein 1-like 1	protein-coding
chr11-209	chr11	68509359	68509559	+	11.5	0.868	intron (NR_126153, intron 1 of 19)	ORR1F|LTR|ERVL-MaLR	6440	NR_126154	104709	Mm.234573	NM_001004435	ENSMUSG00000046207	Pik3r6	BB220380|p84|p84 PIKAP|p87(PIKAP)|p87PIKAP	phosphoinositide-3-kinase, regulatory subunit 6	protein-coding
chr14-91	chr14	25471401	25471601	+	11.5	0.845	intron (NM_001310666, intron 1 of 23)	intron (NM_001310666, intron 1 of 23)	12316	NM_183208	328365	Mm.227484	NM_183208	ENSMUSG00000007817	Zmiz1	BC065120|E330020C23|ENSMUSG00000072684|Gm10397|I920194n01|Rai17|Zimp10	zinc finger, MIZ-type containing 1	protein-coding
chr6-122	chr6	33047882	33048082	+	11.5	0.69	intron (NM_025336, intron 2 of 7)	intron (NM_025336, intron 2 of 7)	12170	NM_025336	66075	Mm.21501	NM_025336	ENSMUSG00000053768	Chchd3	0610041L09Rik|1700039J09Rik|AW558177	coiled-coil-helix-coiled-coil-helix domain containing 3	protein-coding
chr8-68	chr8	70042978	70043178	+	11.5	0.676	promoter-TSS (NM_001167939)	promoter-TSS (NM_001167939)	265	NM_027481	70616	Mm.17665	NM_027481	ENSMUSG00000011306	Sugp1	5730496N02Rik|Sf4	SURP and G patch domain containing 1	protein-coding
chr6-555	chr6	29346843	29347043	+	11.2	0.705	Intergenic	Intergenic	-1163	NM_007594	12321	Mm.392075	NM_007594	ENSMUSG00000029767	Calu	9530075H20Rik	calumenin	protein-coding
chr4-100	chr4	146173945	146174145	+	11.2	0.823	intron (NM_001177545, intron 2 of 4)	RMER17B2|LTR|ERVK	16355	NM_001177545	667666	Mm.459230	NM_001177545	ENSMUSG00000066007	Zfp600	Gm13164|OTTMUSG00000010694	zinc finger protein 600	protein-coding
chr11-199	chr11	115814498	115814698	+	11.2	0.889	promoter-TSS (NM_029557)	promoter-TSS (NM_029557)	-141	NM_029557	76265	Mm.275438	NM_029557	ENSMUSG00000020781	Tsen54	0610034P02Rik	tRNA splicing endonuclease subunit 54	protein-coding
chr1-115	chr1	115920957	115921157	+	11.2	0.808	intron (NM_001077425, intron 3 of 23)	intron (NM_001077425, intron 3 of 23)	235920	NM_001077425	636808	Mm.101576	NM_001077425	ENSMUSG00000070695	Cntnap5a	Caspr5-1|EG636808	contactin associated protein-like 5A	protein-coding
chr2-111	chr2	11497009	11497209	+	11.2	0.676	intron (NM_001177758, intron 1 of 14)	intron (NM_001177758, intron 1 of 14)	4981	NM_001177754	170768	Mm.19669	NM_133232	ENSMUSG00000026773	Pfkfb3	E330010H22Rik|iPFK-2|uPFK-2	6-phosphofructo-2-kinase/fructose-2,6-biphosphatase 3	protein-coding
chr1-239	chr1	184025343	184025543	+	11.2	0.717	Intergenic	Intergenic	8555	NM_028516	73363	Mm.50115	NM_028516	ENSMUSG00000044854	1700056E22Rik	-	RIKEN cDNA 1700056E22 gene	protein-coding
chr4-223	chr4	147432092	147432292	+	11.2	0.81	intron (NM_001039209, intron 1 of 2)	intron (NM_001039209, intron 1 of 2)	-121085	NM_001014397	433804	Mm.332047	NM_001014397	ENSMUSG00000065999	Zfp985	Gm13154|OTTMUSG00000010673	zinc finger protein 985	protein-coding
chr2-110	chr2	6081031	6081231	+	11.2	0.696	Intergenic	AmnSINE1|SINE|Deu	49054	NM_144883	227545	Mm.133542	NM_144883	ENSMUSG00000045319	Proser2	5430407P10Rik|AU067770	proline and serine rich 2	protein-coding
chr16-73	chr16	29483433	29483633	+	11.2	0.568	intron (NM_172613, intron 2 of 29)	B3A|SINE|B2	57950	NM_172613	224079	Mm.54954	NM_172613	ENSMUSG00000038094	Atp13a4	4631413J11Rik|4832416L12|9330174J19Rik	ATPase type 13A4	protein-coding
chr10-240	chr10	116044582	116044782	+	11.2	0.788	intron (NM_011217, intron 1 of 13)	intron (NM_011217, intron 1 of 13)	26319	NM_011217	19279	Mm.336316	NM_011217	ENSMUSG00000020151	Ptprr	Gmcp1|PTP-SL|PTPBR7|RPTPRR|mPTP213	protein tyrosine phosphatase, receptor type, R	protein-coding
chr1-130	chr1	152437955	152438155	+	11.2	0.794	intron (NM_177756, intron 1 of 11)	RLTR10A|LTR|ERVK	38188	NM_177756	269132	Mm.23782	NM_177756	ENSMUSG00000032649	Colgalt2	AI427652|D730024P12|Glt25d2	collagen beta(1-O)galactosyltransferase 2	protein-coding
chr10-279	chr10	25434093	25434293	+	11.2	0.703	intron (NM_013511, intron 1 of 19)	B2_Mm1t|SINE|B2	25825	NM_013511	13822	Mm.306026	NM_013511	ENSMUSG00000019978	Epb41l2	4.1G|AW555191|D10Ertd398e|Epb4.1l2|NBL2	erythrocyte membrane protein band 4.1 like 2	protein-coding
chr18-78	chr18	60137534	60137734	+	11.2	0.679	Intergenic	MTD|LTR|ERVL-MaLR	-74443	NM_001033767	240327	Mm.357104	NM_001033767	ENSMUSG00000073555	Gm4951	EG240327|Ifgga2	predicted gene 4951	protein-coding
chr12-361	chr12	80113714	80113914	+	11.2	0.81	promoter-TSS (NM_007564)	promoter-TSS (NM_007564)	-801	NM_007564	12192	Mm.235132	NM_007564	ENSMUSG00000021127	Zfp36l1	AW742437|AW743212|Berg36|Brf1|D530020L18Rik|ERF1|TIS11b|cMG1	zinc finger protein 36, C3H type-like 1	protein-coding
chr12-276	chr12	85672724	85672924	+	11.2	0.754	Intergenic	Intergenic	-13896	NM_016767	53314	Mm.6672	NM_016767	ENSMUSG00000034266	Batf	B-ATF|SFA-2	basic leucine zipper transcription factor, ATF-like	protein-coding
chr6-434	chr6	43624966	43625166	+	11.2	0.896	intron (NM_001311111, intron 2 of 7)	MER34A1|LTR|ERV1	41212	NM_001311111	29807	Mm.320979	NM_013861	ENSMUSG00000029735	Tpk1	-	thiamine pyrophosphokinase	protein-coding
chr11-128	chr11	117790888	117791088	+	11.2	0.708	exon (NM_001195089, exon 12 of 16)	exon (NM_001195089, exon 12 of 16)	-6672	NM_029964	77727	Mm.159981	NM_029964	ENSMUSG00000025573	6030468B19Rik	-	RIKEN cDNA 6030468B19 gene	protein-coding
chr12-258	chr12	116420425	116420625	+	11.2	0.754	intron (NM_133762, intron 8 of 28)	intron (NM_133762, intron 8 of 28)	15123	NM_133762	76044	Mm.491196	NM_133762	ENSMUSG00000042029	Ncapg2	5830426I05Rik|Luzp5|Mtb|mCAP-G2	non-SMC condensin II complex, subunit G2	protein-coding
chr4-334	chr4	148624710	148624910	+	11.2	0.917	intron (NR_131120, intron 2 of 7)	intron (NR_131120, intron 2 of 7)	2186	NR_027864	230908	Mm.22453	NM_145556	ENSMUSG00000041459	Tardbp	1190002A23Rik|C85084|TDP-43|Tdp43	TAR DNA binding protein	protein-coding
chr15-55	chr15	55557341	55557541	+	11.2	0.721	promoter-TSS (NM_026759)	promoter-TSS (NM_026759)	33	NM_001168250	105837	Mm.390829	NM_134092	ENSMUSG00000022369	Mtbp	AI429604|MDM2BP	Mdm2, transformed 3T3 cell double minute p53 binding protein	protein-coding
chr19-65	chr19	47140004	47140204	+	11.2	0.831	TTS (NM_001081271)	TTS (NM_001081271)	-1810	NM_133746	72691	Mm.31663	NM_133746	ENSMUSG00000033033	Calhm2	2810048G17Rik|Fam26b	calcium homeostasis modulator 2	protein-coding
chr9-114	chr9	108264780	108264980	+	11.2	0.864	promoter-TSS (NM_001276494)	promoter-TSS (NM_001276494)	-922	NM_001276486	13138	Mm.7524	NM_010017	ENSMUSG00000039952	Dag1	D9Wsu13e|DG|Dp427|Dp71	dystroglycan 1	protein-coding
chr14-52	chr14	74889068	74889268	+	11.2	0.759	intron (NM_001252132, intron 1 of 18)	intron (NM_001252132, intron 1 of 18)	58709	NM_001252132	380916	Mm.288868	NM_001033439	ENSMUSG00000068015	Lrch1	4832412D13Rik|AI552548|AW215503|Chdc1|mKIAA1016	leucine-rich repeats and calponin homology (CH) domain containing 1	protein-coding
chr13-82	chr13	12627833	12628033	+	11.2	0.842	intron (NR_003568, intron 2 of 6)	B4A|SINE|B4	22462	NR_003568	664862	Mm.415635	NR_003568		Gpr137b-ps	2310041G17Rik|ENSMUSG00000075118	G protein-coupled receptor 137B, pseudogene	pseudo
chr4-89	chr4	147234867	147235067	+	11.2	0.614	intron (NM_001039209, intron 1 of 2)	intron (NM_001039209, intron 1 of 2)	59101	NM_001039209	195531	Mm.270762	NM_001039209	ENSMUSG00000078496	Zfp982	Gm13152|OTTMUSG00000010671	zinc finger protein 982	protein-coding
chr4-112	chr4	135921983	135922183	+	11.2	0.643	intron (NM_024243, intron 1 of 7)	intron (NM_024243, intron 1 of 7)	1357	NM_024243	71665	Mm.439940	NM_024243	ENSMUSG00000028673	Fuca1	0610006A03Rik|9530055J05Rik|Afuc|Fuca	fucosidase, alpha-L- 1, tissue	protein-coding
chr4-143	chr4	71925184	71925384	+	11.2	0.86	Intergenic	MTD|LTR|ERVL-MaLR	275609	NM_011599	21885	Mm.278444	NM_011599	ENSMUSG00000008305	Tle1	C230057C06Rik|Estm14|Grg-1|Grg1|Tle4l	transducin-like enhancer of split 1	protein-coding
chr3-114	chr3	95518979	95519179	+	11.2	0.882	Intergenic	L1MB4|LINE|L1	-7707	NM_021281	13040	Mm.3619	NM_021281	ENSMUSG00000038642	Ctss	Cats	cathepsin S	protein-coding
chr19-69	chr19	11408808	11409008	+	11.2	0.796	intron (NM_029499, intron 1 of 6)	intron (NM_029499, intron 1 of 6)	1247	NM_029499	64380	Mm.440715	NM_029499	ENSMUSG00000024675	Ms4a4c	5830413L19Rik|AI449185|Ms4a9	membrane-spanning 4-domains, subfamily A, member 4C	protein-coding
chr4-78	chr4	94477240	94477440	+	11.2	0.653	Intergenic	MTEa|LTR|ERVL-MaLR	79456	NM_026368	67770	Mm.35170	NM_026368	ENSMUSG00000028578	Caap1	5830433M19Rik|AI536248|CAAP	caspase activity and apoptosis inhibitor 1	protein-coding
chr5-83	chr5	15591712	15591912	+	11.2	0.875	Intergenic	Intergenic	14865	NM_001310450	105242399		NM_001310450	ENSMUSG00000096878	LOC105242399	-	spermatogenesis associated glutamate (E)-rich protein-like	protein-coding
chr1-112	chr1	21016862	21017062	+	11.2	0.717	intron (NM_177409, intron 2 of 10)	L1Md_F2|LINE|L1	62263	NM_177409	170829	Mm.185680	NM_177409	ENSMUSG00000041779	Tram2	C330003D03Rik	translocating chain-associating membrane protein 2	protein-coding
chr11-114	chr11	8664658	8664858	+	11.2	0.725	promoter-TSS (NM_001083587)	promoter-TSS (NM_001083587)	-223	NM_001083587	319939	Mm.337820	NM_001083587	ENSMUSG00000020422	Tns3	BC023928|F830010I22Rik|TEM6|Tens1	tensin 3	protein-coding
chr12-216	chr12	32647777	32647977	+	11.2	0.797	Intergenic	L1Md_F2|LINE|L1	-172458	NM_021524	59027	Mm.202727	NM_021524	ENSMUSG00000020572	Nampt	1110035O14Rik|AI314458|AI480535|NAmPRTase|Pbef|Pbef1|Visfatin	nicotinamide phosphoribosyltransferase	protein-coding
chr10-109	chr10	58918618	58918818	+	11.2	0.821	intron (NM_172788, intron 1 of 9)	intron (NM_172788, intron 1 of 9)	105359	NM_172788	237353	Mm.333078	NM_172788	ENSMUSG00000037990	Sh3rf3	4831416G18Rik|Igfbp5-ip|Sh3md4|Sh3rf31	SH3 domain containing ring finger 3	protein-coding
chr19-62	chr19	29245496	29245696	+	11.2	0.868	Intergenic	Lx9|LINE|L1	-6207	NM_001048177	16452	Mm.275839	NM_008413	ENSMUSG00000024789	Jak2	Fd17	Janus kinase 2	protein-coding
chr2-307	chr2	34755087	34755287	+	11.2	0.719	promoter-TSS (NM_025709)	promoter-TSS (NM_025709)	45	NM_025709	66691	Mm.156452	NM_025709	ENSMUSG00000026867	Gapvd1	2010005B09Rik|4432404J10Rik|AW108497|Gapex-5|RAP6|RME-6|mKIAA1521	GTPase activating protein and VPS9 domains 1	protein-coding
chr10-59	chr10	130542034	130542234	+	11.2	0.662	Intergenic	Intergenic	-44755	NM_001103366	625131	Mm.469844	NM_001103366	ENSMUSG00000091511	Vmn2r87	EG625131	vomeronasal 2, receptor 87	protein-coding
chr14-78	chr14	122019224	122019424	+	11.2	0.662	intron (NM_026861, intron 8 of 8)	intron (NM_026861, intron 8 of 8)	-15350	NM_001037744	223262	Mm.297637	NM_001037744	ENSMUSG00000071229	Timm8a2	-	translocase of inner mitochondrial membrane 8A2	protein-coding
chr6-200	chr6	136714168	136714368	+	11.2	0.694	intron (NM_001127318, intron 20 of 26)	MIR3|SINE|MIR	-52375	NM_025806	66857	Mm.3311	NM_025806	ENSMUSG00000030214	Plbd1	1100001H23Rik	phospholipase B domain containing 1	protein-coding
chr9-124	chr9	77927590	77927790	+	11.2	0.797	intron (NM_134255, intron 1 of 7)	intron (NM_134255, intron 1 of 7)	10325	NM_134255	68801	Mm.430736	NM_134255	ENSMUSG00000032349	Elovl5	1110059L23Rik|AI747313|AU043003|HELO1	ELOVL family member 5, elongation of long chain fatty acids (yeast)	protein-coding
chr12-464	chr12	3471478	3471678	+	11.2	0.897	intron (NM_172421, intron 5 of 10)	B3|SINE|B2	44721	NM_172421	75302	Mm.120475	NM_172421	ENSMUSG00000037486	Asxl2	4930556B16Rik|mKIAA1685	additional sex combs like 2 (Drosophila)	protein-coding
chr1-243	chr1	16702833	16703033	+	11.2	0.754	intron (NM_001159711, intron 3 of 4)	intron (NM_001159711, intron 3 of 4)	14477	NM_016923	17087	Mm.116844	NM_016923	ENSMUSG00000025779	Ly96	ESOP-1|MD-2|MD2	lymphocyte antigen 96	protein-coding
chr10-171	chr10	127342189	127342389	+	11.2	0.804	promoter-TSS (NM_010296)	promoter-TSS (NM_010296)	-710	NM_010296	14632	Mm.391450	NM_010296	ENSMUSG00000025407	Gli1	AV235269|Zfp-5|Zfp5	GLI-Kruppel family member GLI1	protein-coding
chr3-68	chr3	38485224	38485424	+	11.2	0.804	promoter-TSS (NM_001167883)	promoter-TSS (NM_001167883)	-508	NM_001167883	99696	Mm.290937	NM_001033198	ENSMUSG00000044864	Ankrd50	AI662170|E430012K20Rik|mKIAA1223|mKIAA3019	ankyrin repeat domain 50	protein-coding
chr14-74	chr14	121995045	121995245	+	11.2	0.742	intron (NM_026861, intron 7 of 8)	intron (NM_026861, intron 7 of 8)	-29952	NM_183031	321019	Mm.265618	NM_183031	ENSMUSG00000051212	Gpr183	Ebi2	G protein-coupled receptor 183	protein-coding
chr11-286	chr11	97955654	97955854	+	10.9	0.86	intron (NM_028199, intron 4 of 13)	intron (NM_028199, intron 4 of 13)	30692	NM_028199	72324	Mm.39617	NM_028199	ENSMUSG00000017417	Plxdc1	2410003I07Rik|AI848450|Tem7	plexin domain containing 1	protein-coding
chr16-276	chr16	38679304	38679504	+	10.9	0.836	intron (NM_020260, intron 1 of 11)	intron (NM_020260, intron 1 of 11)	33631	NM_020260	12549	Mm.370848	NM_020260	ENSMUSG00000022799	Arhgap31	5830477L08Rik|AU041750|Cdgap|D330026I07Rik	Rho GTPase activating protein 31	protein-coding
chr5-330	chr5	125391502	125391702	+	10.9	0.721	Intergenic	Intergenic	-1585	NM_019639	22190	Mm.331	NM_019639	ENSMUSG00000008348	Ubc	2700054O04Rik|AI194771|Rps27a|TI-225|Uba52|Ubb	ubiquitin C	protein-coding
chr10-108	chr10	30623133	30623333	+	10.9	0.837	Intergenic	MLTR18D_MM|LTR|ERVK	-4867	NM_025798	66847	Mm.46218	NM_025798	ENSMUSG00000019791	Hint3	0610010I17Rik|AV009015|HINT-3|HINT-4|HINT4	histidine triad nucleotide binding protein 3	protein-coding
chr13-111	chr13	44745085	44745285	+	10.9	0.909	intron (NM_001205044, intron 2 of 18)	RSINE1|SINE|B4	13914	NM_001205043	16468	Mm.25059	NM_021878	ENSMUSG00000038518	Jarid2	Jmj|jumonji	jumonji, AT rich interactive domain 2	protein-coding
chr2-133	chr2	174464178	174464378	+	10.9	0.662	promoter-TSS (NM_025983)	promoter-TSS (NM_025983)	-177	NM_025983	67126	Mm.20841	NM_025983	ENSMUSG00000016252	Atp5e	2410043G19Rik|ATPE|AV000645	ATP synthase, H+ transporting, mitochondrial F1 complex, epsilon subunit	protein-coding
chr14-90	chr14	16902290	16902490	+	10.9	0.769	intron (NM_001289760, intron 1 of 9)	intron (NM_001289760, intron 1 of 9)	179941	NM_001289760	218772	Mm.259318	NM_011243	ENSMUSG00000017491	Rarb	A830025K23|Hap|Nr1b2	retinoic acid receptor, beta	protein-coding
chr13-66	chr13	19373168	19373368	+	10.9	0.707	intron (NM_024270, intron 2 of 8)	intron (NM_024270, intron 2 of 8)	22545	NM_024270	76205	Mm.41940	NM_024270	ENSMUSG00000003062	Stard3nl	0610035N01Rik|6530409L22Rik|AW124774|MENTHO	STARD3 N-terminal like	protein-coding
chr2-231	chr2	92864746	92864946	+	10.9	0.865	Intergenic	L1MD|LINE|L1	-50255	NM_030725	80976	Mm.33490	NM_030725	ENSMUSG00000027220	Syt13	5730409J20Rik|AI549909|mKIAA1427	synaptotagmin XIII	protein-coding
chr11-141	chr11	76202483	76202683	+	10.9	0.804	exon (NM_027773, exon 2 of 5)	exon (NM_027773, exon 2 of 5)	527	NM_027773	116972	Mm.188413	NM_027773	ENSMUSG00000069808	Fam57a	2310047D13Rik|4932415L08Rik|5430402E13Rik|5430420K21Rik|Wdt3	family with sequence similarity 57, member A	protein-coding
chr13-114	chr13	59980792	59980992	+	10.9	0.842	Intergenic	Intergenic	-48819	NR_046142	328263	Mm.123405	NR_046142		A530065N20Rik	A530065N20	RIKEN cDNA A530046M15 gene	ncRNA
chr11-168	chr11	83440489	83440689	+	10.9	0.789	exon (NM_025492, exon 2 of 3)	exon (NM_025492, exon 2 of 3)	2895	NM_025492	66330	Mm.44800	NM_025492	ENSMUSG00000035085	1700020L24Rik	-	RIKEN cDNA 1700020L24 gene	protein-coding
chr1-166	chr1	165173032	165173232	+	10.9	0.837	Intergenic	MMETn-int|LTR|ERVK	-12359	NM_032005	83993	Mm.190649	NM_032005	ENSMUSG00000026572	Tbx19	AU019250|D1Ertd754e|Tpit	T-box 19	protein-coding
chr11-117	chr11	51808681	51808881	+	10.9	0.9	Intergenic	(TTTA)n|Simple_repeat|Simple_repeat	45118	NM_025535	66397	Mm.196592	NM_025535	ENSMUSG00000020386	Sar1b	2310075M17Rik|2900019I22Rik|CMRD|Sara1b|Sara2|Sarb	secretion associated Ras related GTPase 1B	protein-coding
chr5-154	chr5	72872500	72872700	+	10.9	0.826	Intergenic	Intergenic	-4152	NM_001113460	21682	Mm.319581	NM_013689	ENSMUSG00000029217	Tec	-	tec protein tyrosine kinase	protein-coding
chr14-110	chr14	103013077	103013277	+	10.9	0.672	intron (NR_045657, intron 2 of 2)	intron (NR_045657, intron 2 of 2)	20626	NR_045657	71264	Mm.399572	NR_045657		4933432I03Rik	-	RIKEN cDNA 4933432I03 gene	ncRNA
chr17-107	chr17	32596467	32596667	+	10.9	0.625	Intergenic	IAPEY3-int|LTR|ERVK	-24752	NM_001100187	677156	Mm.484117	NM_001100187	ENSMUSG00000062464	Cyp4f37	Gm9705	cytochrome P450, family 4, subfamily f, polypeptide 37	protein-coding
chr2-105	chr2	122681557	122681757	+	10.9	0.542	3' UTR (NM_011774, exon 7 of 7)	3' UTR (NM_011774, exon 7 of 7)	21006	NM_011774	22785	Mm.27801	NM_011774	ENSMUSG00000005802	Slc30a4	Znt4|lm|znT-4	solute carrier family 30 (zinc transporter), member 4	protein-coding
chr1-310	chr1	80671173	80671373	+	10.9	0.667	intron (NM_175291, intron 1 of 55)	intron (NM_175291, intron 1 of 55)	-5921	NM_001285927	210293	Mm.133473	NM_175291	ENSMUSG00000038608	Dock10	9330153B10Rik|A630054M16Rik|Jr4|Jr5|R75174|ZIZ3|Zizimin3|mKIAA0694	dedicator of cytokinesis 10	protein-coding
chr6-107	chr6	128447727	128447927	+	10.9	0.653	intron (NR_028593, intron 2 of 4)	intron (NR_028593, intron 2 of 4)	9070	NR_028592	791299	Mm.297516	NR_028592	ENSMUSG00000059659	Gm10069	ENSMUSG00000059659	predicted gene 10069	ncRNA
chr3-155	chr3	96736545	96736745	+	10.9	0.852	intron (NM_026406, intron 1 of 8)	intron (NM_026406, intron 1 of 8)	9034	NM_026406	67845	Mm.386792	NM_026406	ENSMUSG00000028098	Rnf115	2610028E05Rik|AU042696|Zfp364	ring finger protein 115	protein-coding
chr8-105	chr8	83698550	83698750	+	10.9	0.631	intron (NM_177262, intron 1 of 21)	CpG	529	NM_177262	320795	Mm.213000	NM_177262	ENSMUSG00000057672	Pkn1	DBK|F730027O18Rik|PAK1|PRK1|Pkn|Prkcl1|Stk3	protein kinase N1	protein-coding
chr11-165	chr11	69133636	69133836	+	10.9	0.78	intron (NM_011786, intron 7 of 14)	intron (NM_011786, intron 7 of 14)	7359	NM_011786	23801	Mm.41989	NM_011786	ENSMUSG00000020892	Aloxe3	e-LOX-3|eLOX-3	arachidonate lipoxygenase 3	protein-coding
chr2-280	chr2	32720389	32720589	+	10.9	0.635	promoter-TSS (NM_013781)	promoter-TSS (NM_013781)	-566	NR_045535	27387	Mm.9593	NM_013781	ENSMUSG00000059013	Sh2d3c	Chat|Nsp3|Shep1	SH2 domain containing 3C	protein-coding
chr9-148	chr9	66870072	66870272	+	10.9	0.9	intron (NM_173413, intron 1 of 7)	B3|SINE|B2	-35466	NM_026674	68318	Mm.284229	NM_026674	ENSMUSG00000053040	Aph1c	0610008A10Rik|APH-1b|Aph1b	aph1 homolog C, gamma secretase subunit	protein-coding
chr1-149	chr1	40084932	40085132	+	10.9	0.639	intron (NR_037980, intron 2 of 3)	intron (NR_037980, intron 2 of 3)	264	NM_010555	16178	Mm.1349	NM_010555	ENSMUSG00000026073	Il1r2	CD121b|Il1r-2	interleukin 1 receptor, type II	protein-coding
chr11-198	chr11	106461201	106461401	+	10.9	0.741	intron (NM_023913, intron 1 of 21)	intron (NM_023913, intron 1 of 21)	26495	NM_023913	78943	Mm.340943	NM_023913	ENSMUSG00000020715	Ern1	9030414B18Rik|AI225830|C85377|Ire1a|Ire1alpha|Ire1p	endoplasmic reticulum (ER) to nucleus signalling 1	protein-coding
chr12-484	chr12	40699483	40699683	+	10.9	0.816	intron (NM_172803, intron 13 of 52)	intron (NM_172803, intron 13 of 52)	253530	NM_172803	238130	Mm.341423	NM_172803	ENSMUSG00000035954	Dock4	5330406C03|6330411N01Rik|AF263288|C030023J22|mKIAA0716	dedicator of cytokinesis 4	protein-coding
chr4-224	chr4	3473684	3473884	+	10.9	0.782	Intergenic	L1Md_F2|LINE|L1	-63306	NR_037306	100499523		NR_037306	ENSMUSG00000094253	Mir3471-2	mmu-mir-3471-2	microRNA 3471-2	ncRNA
chr18-91	chr18	5659672	5659872	+	10.9	0.885	intron (NM_011546, intron 1 of 7)	L1Md_F|LINE|L1	-67335	NR_033552	791318	Mm.84339	NR_033552	ENSMUSG00000063087	Gm10125	ENSMUSG00000063087|Zeb1os	predicted gene 10125	ncRNA
chr5-97	chr5	14956477	14956677	+	10.9	0.778	intron (NR_001584, intron 1 of 3)	L1Md_F2|LINE|L1	11283	NR_001584	74062	Mm.394766	NR_001584		Speer8-ps1	4933405L09Rik|SPEER-8|Speer8-ps	spermatogenesis associated glutamate (E)-rich protein 8, pseudogene 1	pseudo
chr11-160	chr11	9146856	9147056	+	10.9	0.652	Intergenic	MLTR14|LTR|ERV1	28449	NM_001159402	22271	Mm.4610	NM_009477	ENSMUSG00000020407	Upp1	AI325217|UPase|UdRPase|Up|Upp	uridine phosphorylase 1	protein-coding
chr4-273	chr4	126433788	126433988	+	10.9	0.894	Intergenic	Intergenic	-4346	NM_153402	214150	Mm.440915	NM_153402	ENSMUSG00000028842	Ago3	AW048688|C130014L07Rik|Eif2c3	argonaute RISC catalytic subunit 3	protein-coding
chr3-110	chr3	69159182	69159382	+	10.9	0.894	Intergenic	BGLII|LTR|ERVK	28049	NR_126533	381452	Mm.331067	NM_001243000	ENSMUSG00000094763	Gm1647	-	predicted gene 1647	ncRNA
chrX-8	chrX	7963778	7963978	+	10.9	0.807	intron (NM_008089, intron 1 of 5)	CT-rich|Low_complexity|Low_complexity	4032	NM_008089	14460	Mm.335973	NM_008089	ENSMUSG00000031162	Gata1	Gata-1|Gf-1|eryf1	GATA binding protein 1	protein-coding
chrUn_GL456378-1	chrUn_GL456378	5475	5675	+	10.9	0.935	NA	Lx2|LINE|L1	NA	NA
chr2-121	chr2	73014348	73014548	+	10.9	0.839	Intergenic	MuRRS4-int|LTR|ERV1	-34002	NM_001018042	20687	Mm.124328	NM_011450	ENSMUSG00000027109	Sp3	D130027J01Rik	trans-acting transcription factor 3	protein-coding
chr10-61	chr10	17723075	17723275	+	10.9	0.793	promoter-TSS (NM_010828)	promoter-TSS (NM_010828)	-53	NM_010828	17684	Mm.272321	NM_010828	ENSMUSG00000039910	Cited2	AI835299|ER154-like|Mrg1|Msg2|p35srj	Cbp/p300-interacting transactivator, with Glu/Asp-rich carboxy-terminal domain, 2	protein-coding
chr10-97	chr10	94601264	94601464	+	10.9	0.732	Intergenic	Intergenic	-15165	NR_106070	102466817		NR_106070	ENSMUSG00000098544	Mir7211	Gm27536|mmu-mir-7211	microRNA 7211	ncRNA
chr12-392	chr12	69400920	69401120	+	10.9	0.792	Intergenic	Intergenic	28870	NM_007481	11845	Mm.27308	NM_007481	ENSMUSG00000044147	Arf6	AI788669|AW496366	ADP-ribosylation factor 6	protein-coding
chr15-135	chr15	12236432	12236632	+	10.9	0.648	intron (NM_172958, intron 5 of 15)	intron (NM_172958, intron 5 of 15)	31438	NM_172958	268783	Mm.54460	NM_172958	ENSMUSG00000039458	Mtmr12	3Pap|4932703C11|C730015A02Rik|Pip3ap|mKIAA1682	myotubularin related protein 12	protein-coding
chr4-218	chr4	145533021	145533221	+	10.9	0.936	Intergenic	Intergenic	68911	NR_002888	545700	Mm.389595	NR_002888	ENSMUSG00000052912	Smarca5-ps	9230115A19Rik|OTTMUSG00000011029	SWI/SNF related, matrix associated, actin depenent ragulator of chromatin, subfamily a, member 5, pseudogene	pseudo
chr12-697	chr12	112010940	112011140	+	10.9	0.864	intron (NM_029056, intron 9 of 35)	B3|SINE|B2	-30289	NM_001127685	217874	Mm.134213	NM_001127685	ENSMUSG00000091402	Rd3l	A930011N13	retinal degeneration 3-like	protein-coding
chr5-150	chr5	15510585	15510785	+	10.9	0.857	Intergenic	Lx|LINE|L1	18537	NM_001310449	100861755	Mm.382859	NM_001310449	ENSMUSG00000106445	Gm21190	-	predicted gene, 21190	protein-coding
chr19-103	chr19	35190965	35191165	+	10.9	0.698	Intergenic	CT-rich|Low_complexity|Low_complexity	268707	NM_183046	240641	Mm.278471	NM_183046	ENSMUSG00000024795	Kif20b	33cex|B130024C23|C330014J10Rik|Mphosph1|magoo	kinesin family member 20B	protein-coding
chr13-105	chr13	84185852	84186052	+	10.9	0.696	Intergenic	L1_Mus3|LINE|L1	-36344	NR_029418	72745	Mm.295063	NM_175187	ENSMUSG00000035762	Tmem161b	2810446P07Rik|AI843389	transmembrane protein 161B	protein-coding
chr11-562	chr11	86637111	86637311	+	10.9	0.792	intron (NM_029478, intron 6 of 11)	L1MC5|LINE|L1	-18860	NR_106195	102465902		NR_106195	ENSMUSG00000099324	Mir8115	Gm28012|mmu-mir-8115	microRNA 8115	ncRNA
chr2-151	chr2	119356974	119357174	+	10.9	0.8	Intergenic	Intergenic	5832	NM_026929	69065	Mm.35083	NM_026929	ENSMUSG00000027313	Chac1	1810008K03Rik	ChaC, cation transport regulator 1	protein-coding
chr5-85	chr5	75791917	75792117	+	10.9	0.652	Intergenic	Intergenic	186411	NM_010612	16542	Mm.285	NM_010612	ENSMUSG00000062960	Kdr	6130401C07|Flk-1|Flk1|Krd-1|Ly73|VEGFR-2|VEGFR2|sVEGFR-2	kinase insert domain protein receptor	protein-coding
chr6-190	chr6	39420493	39420693	+	10.9	0.692	promoter-TSS (NM_001311109)	promoter-TSS (NM_001311109)	-224	NM_018810	54484	Mm.270484	NM_018810	ENSMUSG00000029922	Mkrn1	RFP	makorin, ring finger protein, 1	protein-coding
chr6-112	chr6	129037015	129037215	+	10.9	0.868	Intergenic	Intergenic	-8786	NR_024262	232408	Mm.259262	NM_153094	ENSMUSG00000030154	Klrb1f	A630024B12Rik|Nkr-p1f|Nkrp1-f|Nkrp1f	killer cell lectin-like receptor subfamily B member 1F	protein-coding
chr6-532	chr6	126910538	126910738	+	10.9	0.645	intron (NM_207210, intron 2 of 14)	intron (NM_207210, intron 2 of 14)	11201	NM_207210	101320	Mm.44896	NM_207210	ENSMUSG00000030345	Dyrk4	AW049118|Dyrk4a|Dyrk4b	dual-specificity tyrosine-(Y)-phosphorylation regulated kinase 4	protein-coding
chr3-70	chr3	107478861	107479061	+	10.9	0.613	intron (NR_121629, intron 5 of 12)	(CAGTG)n|Simple_repeat|Simple_repeat	-20063	NM_145922	99738	Mm.101976	NM_145922	ENSMUSG00000027895	Kcnc4	AI850292|KSHIIIC|Kcr2-4|Kv3.4	potassium voltage gated channel, Shaw-related subfamily, member 4	protein-coding
chr9-218	chr9	32516891	32517091	+	10.9	0.673	intron (NM_008026, intron 1 of 8)	intron (NM_008026, intron 1 of 8)	24461	NM_008026	14247	Mm.258908	NM_008026	ENSMUSG00000016087	Fli1	EWSR2|Fli-1|SIC-1|Sic1	Friend leukemia integration 1	protein-coding
chr7-102	chr7	44207903	44208103	+	10.9	0.758	intron (NM_010915, intron 1 of 4)	intron (NM_010915, intron 1 of 4)	568	NM_010915	18048	Mm.440886	NM_010915	ENSMUSG00000066513	Klk1b4	Ngfa|alpha-NGF|mGk-4	kallikrein 1-related pepidase b4	protein-coding
chr5-109	chr5	43293194	43293394	+	10.9	0.706	Intergenic	Intergenic	-57940	NR_028417	665934	Mm.381491	NR_028417	ENSMUSG00000085720	Gm7854	EG665934|ENSMUSG00000054483	predicted gene 7854	ncRNA
chr11-110	chr11	69666432	69666632	+	10.9	0.754	promoter-TSS (NM_001291058)	promoter-TSS (NM_001291058)	-362	NR_110993	12514	Mm.15819	NM_009853	ENSMUSG00000018774	Cd68	Lamp4|Scard1|gp110	CD68 antigen	protein-coding
chr2-139	chr2	153475468	153475668	+	10.9	0.758	intron (NM_001134300, intron 3 of 10)	intron (NM_001134300, intron 3 of 10)	-31089	NM_001001986	329540	Mm.50600	NM_001001986	ENSMUSG00000061411	Nol4l	4931410H15|8430427H17Rik|AI429157|Gm1636	nucleolar protein 4-like	protein-coding
chr9-391	chr9	91954959	91955159	+	10.9	0.87	Intergenic	B3|SINE|B2	-237877	NM_001195693	100504689	Mm.464262	NM_001195693	ENSMUSG00000095654	Plscr5	331000	phospholipid scramblase family, member 5	protein-coding
chr8-143	chr8	20424732	20424932	+	10.9	0.933	promoter-TSS (NR_028428)	promoter-TSS (NR_028428)	-18	NR_028428	381598	Mm.359054	NM_001024708	ENSMUSG00000071793	2610005L07Rik	2810038F24Rik|6720476A01Rik	cadherin 11 pseudogene	pseudo
chr16-68	chr16	44138821	44139021	+	10.9	0.729	promoter-TSS (NM_028108)	promoter-TSS (NM_028108)	98	NM_007508	11964	Mm.217787	NM_007508	ENSMUSG00000052459	Atp6v1a	AI647066|Atp6a1|Atp6a2|Atp6v1a1|VA68|VPP2	ATPase, H+ transporting, lysosomal V1 subunit A	protein-coding
chr11-321	chr11	119394477	119394677	+	10.9	0.737	Intergenic	Intergenic	4105	NR_035453	100316690		NR_035453	ENSMUSG00000088015	Mir1932	mir-1932|mmu-mir-1932	microRNA 1932	ncRNA
chr5-122	chr5	9142357	9142557	+	10.9	0.882	intron (NM_011806, intron 4 of 17)	L2|LINE|L2	19319	NM_001110327	23857	Mm.22480	NM_011806	ENSMUSG00000042508	Dmtf1	Dimp|Dmp1	cyclin D binding myb-like transcription factor 1	protein-coding
chr12-320	chr12	40353223	40353423	+	10.9	0.75	intron (NM_178845, intron 4 of 11)	L1_Mus1|LINE|L1	92467	NM_172575	246196	Mm.26852	NM_172575	ENSMUSG00000055917	Zfp277	2410017E24Rik|NIRF4	zinc finger protein 277	protein-coding
chr7-225	chr7	100932337	100932537	+	10.7	0.778	promoter-TSS (NM_001081116)	promoter-TSS (NM_001081116)	-276	NM_001081116	207212	Mm.29954	NM_001081116	ENSMUSG00000032875	Arhgef17	8030463K16|AI428794|AW558066|BC035332|mKIAA0337	Rho guanine nucleotide exchange factor (GEF) 17	protein-coding
chr1-157	chr1	191075180	191075380	+	10.7	0.794	intron (NM_198654, intron 4 of 5)	intron (NM_198654, intron 4 of 5)	12259	NM_198654	381318	Mm.32504	NM_198654	ENSMUSG00000062510	Nsl1	4833432M17Rik|AI451597|Gm105|Gm984	NSL1, MIS12 kinetochore complex component	protein-coding
chr2-165	chr2	76369873	76370073	+	10.7	0.792	promoter-TSS (NM_153405)	promoter-TSS (NM_153405)	-11	NM_153405	241490	Mm.33310	NM_153405	ENSMUSG00000042369	Rbm45	Drb1|Drbp1|G430095G15Rik	RNA binding motif protein 45	protein-coding
chr2-114	chr2	71866773	71866973	+	10.7	0.672	intron (NR_039557, intron 3 of 3).2	intron (NR_039557, intron 3 of 3).2	-6351	NM_172665	228026	Mm.34411	NM_172665	ENSMUSG00000006494	Pdk1	B830012B01|D530020C15Rik	pyruvate dehydrogenase kinase, isoenzyme 1	protein-coding
chr8-292	chr8	106156050	106156250	+	10.7	0.755	intron (NM_133792, intron 2 of 5)	B1F|SINE|Alu	5751	NM_133792	192654	Mm.284770	NM_133792	ENSMUSG00000031903	Pla2g15	ACS|C87498|LLPL|Lpla2|Lypla3	phospholipase A2, group XV	protein-coding
chr5-95	chr5	138430697	138430897	+	10.7	0.712	Intergenic	L1_Mus3|LINE|L1	-10679	NM_028130	72154	Mm.20263	NM_028130	ENSMUSG00000036898	Zfp157	2610020C11Rik|A630094N24Rik|AI327407|mszf12|mszf23-1	zinc finger protein 157	protein-coding
chr11-236	chr11	100584581	100584781	+	10.7	0.618	exon (NM_019795, exon 11 of 14)	exon (NM_019795, exon 11 of 14)	8790	NM_001146318	12799	Mm.15711	NM_009923	ENSMUSG00000006782	Cnp	CNPase|Cnp-1|Cnp1	2',3'-cyclic nucleotide 3' phosphodiesterase	protein-coding
chr13-173	chr13	104433070	104433270	+	10.7	0.714	intron (NM_001081020, intron 18 of 24)	RMER15|LTR|ERVL	145297	NM_001081020	108154	Mm.208125	NM_175496	ENSMUSG00000046169	Adamts6	A930019D11Rik|ADAM-TS6|b2b1879.1Clo|b2b2029Clo|b2b2182Clo|b2b2187.1Clo|b2b2228Clo	a disintegrin-like and metallopeptidase (reprolysin type) with thrombospondin type 1 motif, 6	protein-coding
chr18-118	chr18	55028369	55028569	+	10.7	0.662	Intergenic	Intergenic	-38289	NM_175751	269023	Mm.192984	NM_175751	ENSMUSG00000052713	Zfp608	4932417D18Rik|D430007A19Rik|Znf608	zinc finger protein 608	protein-coding
chr6-248	chr6	81651031	81651231	+	10.7	0.846	Intergenic	Intergenic	244532	NR_106091	102465711		NR_106091	ENSMUSG00000106154	Mir7232	mmu-mir-7232	microRNA 7232	ncRNA
chr2-120	chr2	71787611	71787811	+	10.7	0.808	intron (NM_001277970, intron 1 of 24)	CpG	772	NM_001277970	16403	Mm.225096	NM_008397	ENSMUSG00000027111	Itga6	5033401O05Rik|AI115430|Cd49f|VLA-6	integrin alpha 6	protein-coding
chr8-132	chr8	19707540	19707740	+	10.7	0.617	Intergenic	Intergenic	-21936	NM_001270553	100861668	Mm.491087	NM_001270553	ENSMUSG00000095294	Gm21119	-	predicted gene, 21119	protein-coding
chr2-112	chr2	32951823	32952023	+	10.7	0.639	intron (NM_199302, intron 8 of 24)	intron (NM_199302, intron 8 of 24)	9332	NM_199302	227738	Mm.248037	NM_199302	ENSMUSG00000026792	Lrsam1	-	leucine rich repeat and sterile alpha motif containing 1	protein-coding
chr8-165	chr8	127930830	127931030	+	10.7	0.782	Intergenic	B4|SINE|B4	347295	NR_105822	102465212		NR_105822	ENSMUSG00000099326	Mir21c	Gm28013|mmu-mir-21c	microRNA 21c	ncRNA
chr11-189	chr11	19926827	19927027	+	10.7	0.714	intron (NM_033523, intron 1 of 5)	intron (NM_033523, intron 1 of 5)	2485	NM_033523	114716	Mm.266627	NM_033523	ENSMUSG00000045671	Spred2	C79158	sprouty-related, EVH1 domain containing 2	protein-coding
chr12-218	chr12	37373765	37373965	+	10.7	0.774	intron (NM_178767, intron 5 of 12)	intron (NM_178767, intron 5 of 12)	132226	NM_178767	319660	Mm.485540	NM_178767	ENSMUSG00000050103	Agmo	A530016O06Rik|AI790538|Tmem195	alkylglycerol monooxygenase	protein-coding
chr5-184	chr5	150773672	150773872	+	10.7	0.768	intron (NM_175310, intron 19 of 34)	intron (NM_175310, intron 19 of 34)	99945	NM_175310	100710	Mm.32959	NM_175310	ENSMUSG00000034021	Pds5b	AI646570|AS3|AW212954|Aprin|Tg(Wap-ERBB2)229Wzw|WAP-Her-2|mKIAA0979	PDS5 cohesin associated factor B	protein-coding
chr19-68	chr19	5114047	5114247	+	10.7	0.786	exon (NM_008451, exon 3 of 16)	exon (NM_008451, exon 3 of 16)	4261	NR_045528	16594	Mm.271648	NM_008451	ENSMUSG00000024862	Klc2	8030455F02Rik|AW212649|KLC 2|KLC-2	kinesin light chain 2	protein-coding
chr8-136	chr8	71853418	71853618	+	10.7	0.821	Intergenic	Intergenic	-28550	NM_145624	236193	Mm.290790	NM_145624	ENSMUSG00000056019	Zfp709	BC021921|GIOT-4|HIT-40	zinc finger protein 709	protein-coding
chr6-328	chr6	120036759	120036959	+	10.7	0.789	intron (NM_001185021, intron 1 of 25)	intron (NM_001185021, intron 1 of 25)	1796	NM_001199083	232341	Mm.333349	NM_198703	ENSMUSG00000045962	Wnk1	6430573H23Rik|EG406236|Hsn2|Prkwnk1|mKIAA0344	WNK lysine deficient protein kinase 1	protein-coding
chr16-196	chr16	97719865	97720065	+	10.7	0.738	Intergenic	MTD|LTR|ERVL-MaLR	43790	NM_023663	72388	Mm.35290	NM_023663	ENSMUSG00000005251	Ripk4	2310069J12Rik|AI552420|ANKK2|Ankrd3|DIk|PKK|RIP4	receptor-interacting serine-threonine kinase 4	protein-coding
chr6-169	chr6	124688478	124688678	+	10.7	0.741	intron (NM_145130, intron 1 of 12)	intron (NM_145130, intron 1 of 12)	23600	NM_013536	14791	Mm.6390	NM_013536	ENSMUSG00000004268	Emg1	C2f|Grcc2f	EMG1 N1-specific pseudouridine methyltransferase	protein-coding
chr4-171	chr4	147417389	147417589	+	10.7	0.81	intron (NM_001039209, intron 1 of 2)	MLTR14|LTR|ERV1	-135788	NM_001014397	433804	Mm.332047	NM_001014397	ENSMUSG00000065999	Zfp985	Gm13154|OTTMUSG00000010673	zinc finger protein 985	protein-coding
chr3-270	chr3	154663247	154663447	+	10.7	0.788	Intergenic	Intergenic	-47786	NM_175176	209601	Mm.331454	NM_175176	ENSMUSG00000078161	Erich3	1700013E18Rik|4922501L14Rik|5031409G23Rik|AI596448|Gm133	glutamate rich 3	protein-coding
chr14-88	chr14	7932527	7932727	+	10.7	0.671	intron (NM_134080, intron 38 of 45)	intron (NM_134080, intron 38 of 45)	61555	NM_007870	13421	Mm.272258	NM_007870	ENSMUSG00000025279	Dnase1l3	DNasegamma|Dhp2|Lsd	deoxyribonuclease 1-like 3	protein-coding
chr9-141	chr9	57594790	57594990	+	10.7	0.705	intron (NM_027895, intron 15 of 15)	intron (NM_027895, intron 15 of 15)	5438	NM_027895	71742	Mm.155877	NM_027895	ENSMUSG00000032308	Ulk3	1200015E14Rik	unc-51-like kinase 3	protein-coding
chr10-185	chr10	95278304	95278504	+	10.7	0.671	intron (NM_009950, intron 2 of 2)	MTD-int|LTR|ERVL-MaLR	45693	NM_009950	12905	Mm.473739	NM_009950	ENSMUSG00000045867	Cradd	RAIDD	CASP2 and RIPK1 domain containing adaptor with death domain	protein-coding
chr9-200	chr9	50558430	50558630	+	10.7	0.872	intron (NM_025687, intron 2 of 4)	intron (NM_025687, intron 2 of 4)	2738	NM_025687	66654	Mm.442255	NM_025687	ENSMUSG00000032065	Tex12	5730518K06Rik	testis expressed gene 12	protein-coding
chr11-243	chr11	9538343	9538543	+	10.7	0.849	intron (NM_178259, intron 47 of 61)	intron (NM_178259, intron 47 of 61)	346501	NM_178259	268379	Mm.39270	NM_178259	ENSMUSG00000004668	Abca13	9830132L24|A930002G16Rik|AI956815	ATP-binding cassette, sub-family A (ABC1), member 13	protein-coding
chr10-191	chr10	111972742	111972942	+	10.7	0.854	exon (NM_178610, exon 1 of 10)	exon (NM_178610, exon 1 of 10)	147	NM_178610	52705	Mm.34606	NM_178610	ENSMUSG00000063334	Krr1	2610511F02Rik|AI255219|AI428520|D10Ertd773e|Hrb2	KRR1, small subunit (SSU) processome component, homolog (yeast)	protein-coding
chr4-96	chr4	129880604	129880804	+	10.7	0.692	Intergenic	CT-rich|Low_complexity|Low_complexity	-25522	NR_045190	319894	Mm.59196	NR_045190	ENSMUSG00000086369	E330017L17Rik	-	RIKEN cDNA E330017L17 gene	ncRNA
chr11-318	chr11	104003927	104004127	+	10.7	0.891	Intergenic	PB1D9|SINE|Alu	37156	NM_007477	11841	Mm.5061	NM_007477	ENSMUSG00000062421	Arf2	-	ADP-ribosylation factor 2	protein-coding
chr3-200	chr3	6205648	6205848	+	10.7	0.643	Intergenic	Intergenic	414695	NM_027048	69347	Mm.45822	NM_027048	ENSMUSG00000069118	1700008P02Rik	-	RIKEN cDNA 1700008P02 gene	protein-coding
chr12-486	chr12	51715872	51716072	+	10.7	0.774	intron (NM_021710, intron 1 of 5)	B2_Mm2|SINE|B2	-24058	NM_052973	94186	Mm.65979	NM_052973	ENSMUSG00000020954	Strn3	Gs2na|SG2NA	striatin, calmodulin binding protein 3	protein-coding
chr2-191	chr2	25634588	25634788	+	10.7	0.678	Intergenic	RLTR13D3A1|LTR|ERVK	-6714	NM_007995	14133	Mm.10510	NM_007995	ENSMUSG00000026938	Fcna	Fcn1	ficolin A	protein-coding
chr14-56	chr14	61312250	61312450	+	10.7	0.803	TTS (NM_177337)	TTS (NM_177337)	2597	NM_177337	219144	Mm.206566	NM_177337	ENSMUSG00000043157	Arl11	ARLTS1|C730007L20Rik	ADP-ribosylation factor-like 11	protein-coding
chr13-98	chr13	29970509	29970709	+	10.7	0.849	intron (NM_010093, intron 1 of 6)	intron (NM_010093, intron 1 of 6)	13782	NM_001289920	13557	Mm.268356	NM_010093	ENSMUSG00000016477	E2f3	E2F3b|E2f3a	E2F transcription factor 3	protein-coding
chr11-443	chr11	107147458	107147658	+	10.7	0.833	Intergenic	RMER16_Mm|LTR|ERVK	-9850	NM_001308498	105734734		NM_001308498		Gm11715	OTTMUSG00000003631	predicted gene 11715	protein-coding
chr10-167	chr10	113612134	113612334	+	10.7	0.86	intron (NR_035418, intron 1 of 1)	ORR1B2|LTR|ERVL-MaLR	25656	NR_035418	100316831		NR_035418	ENSMUSG00000080594	Mir669h	Mirn669h|mir-669h|mmu-mir-669h	microRNA 669h	ncRNA
chr3-445	chr3	76259348	76259548	+	10.7	0.837	intron (NM_178673, intron 3 of 15)	Lx|LINE|L1	183865	NM_001253719	213262	Mm.379337	NM_178673	ENSMUSG00000034098	Fstl5	9130207J01Rik	follistatin-like 5	protein-coding
chr3-154	chr3	94366585	94366785	+	10.7	0.86	Intergenic	Intergenic	4241	NM_001136117	271944	Mm.271006	NM_001136117	ENSMUSG00000091648	C2cd4d	Gm659	C2 calcium-dependent domain containing 4D	protein-coding
chr6-180	chr6	89140471	89140671	+	10.7	0.708	promoter-TSS (NR_121593)	promoter-TSS (NR_121593)	-423	NR_121594	434065	Mm.333241	NM_001033491	ENSMUSG00000090254	Gm1965	AU018164|AU021089|AU023851|C86079	predicted gene 1965	ncRNA
chr7-101	chr7	19800717	19800917	+	10.7	0.566	Intergenic	Intergenic	-4008	NM_023224	80794	Mm.81698	NM_023224	ENSMUSG00000040525	Cblc	2310076I21Rik|2310079L19Rik|Cbl3	Casitas B-lineage lymphoma c	protein-coding
chr16-132	chr16	97992666	97992866	+	10.7	0.634	Intergenic	Intergenic	-4581	NR_130962	245305	Mm.148033	NR_130962		B230307C23Rik	EG245305|OTTMUSG00000028475	RIKEN cDNA B230307C23 gene	ncRNA
chr11-177	chr11	121339736	121339936	+	10.7	0.836	intron (NM_025793, intron 3 of 9)	intron (NM_025793, intron 3 of 9)	14611	NM_025793	66840	Mm.103986	NM_025793	ENSMUSG00000025173	Wdr45b	0610008N23Rik|AA408735|D16Bwg0193e|WIPI-3|Wdr45l	WD repeat domain 45B	protein-coding
chr2-118	chr2	19577790	19577990	+	10.7	0.75	Intergenic	Intergenic	-23980	NM_027600	70909	Mm.158488	NM_027600	ENSMUSG00000026734	4921504E06Rik	4921522E24Rik	RIKEN cDNA 4921504E06 gene	protein-coding
chr18-83	chr18	35098677	35098877	+	10.7	0.719	Intergenic	Intergenic	-20135	NM_009818	12385	Mm.18962	NM_009818	ENSMUSG00000037815	Ctnna1	2010010M04Rik|AA517462|AI988031|Catna1	catenin (cadherin associated protein), alpha 1	protein-coding
chr5-114	chr5	123066712	123066912	+	10.7	0.833	Intergenic	Intergenic	-9463	NM_001039723	330189	Mm.391872	NM_001039723	ENSMUSG00000054434	Tmem120b	-	transmembrane protein 120B	protein-coding
chr9-251	chr9	50486670	50486870	+	10.7	0.75	Intergenic	Intergenic	-7755	NM_029639	76509	Mm.29959	NM_029639	ENSMUSG00000032068	Plet1	0610037B23Rik|1600029D21Rik|AA407923|AU043048	placenta expressed transcript 1	protein-coding
chr17-92	chr17	71195180	71195380	+	10.4	0.721	intron (NM_022882, intron 1 of 19)	intron (NM_022882, intron 1 of 19)	-9374	NM_001164885	64898	Mm.227924	NM_022882	ENSMUSG00000024052	Lpin2	2610511G02Rik|AI481352|AW742896	lipin 2	protein-coding
chr9-266	chr9	25559077	25559277	+	10.4	0.82	intron (NM_026189, intron 3 of 7)	L1_Mur2|LINE|L1	77580	NM_026189	67484	Mm.112977	NM_026189	ENSMUSG00000036611	Eepd1	2310005P05Rik|AI481005	endonuclease/exonuclease/phosphatase family domain containing 1	protein-coding
chr8-191	chr8	83118350	83118550	+	10.4	0.765	Intergenic	L1Md_A|LINE|L1	-46902	NM_001111304	71310	Mm.24031	NM_027758	ENSMUSG00000031709	Tbc1d9	4933431N12Rik|AI847101|AW490653|C76116	TBC1 domain family, member 9	protein-coding
chr6-188	chr6	136814975	136815175	+	10.4	0.764	intron (NM_021714, intron 11 of 11)	(TAAA)n|Simple_repeat|Simple_repeat	6827	NM_177688	232440	Mm.154564	NM_177688	ENSMUSG00000060032	H2afj	E130307C13	H2A histone family, member J	protein-coding
chr2-272	chr2	13462174	13462374	+	10.4	0.755	intron (NM_001081084, intron 14 of 66)	MTD|LTR|ERVL-MaLR	29602	NM_001081084	65969	Mm.313915	NM_001081084	ENSMUSG00000026726	Cubn	AA408369|AL022750|D2Wsu88e	cubilin (intrinsic factor-cobalamin receptor)	protein-coding
chr1-175	chr1	36837913	36838113	+	10.4	0.737	exon (NM_018872, exon 8 of 41)	exon (NM_018872, exon 8 of 41)	59029	NM_001289612	22637	Mm.8038	NM_009539	ENSMUSG00000026117	Zap70	Srk|ZAP-70|mrtle|mur	zeta-chain (TCR) associated protein kinase	protein-coding
chr2-337	chr2	22851643	22851843	+	10.4	0.884	intron (NM_019456, intron 8 of 13)	URR1A|DNA|hAT-Charlie	-43779	NM_019501	56075	Mm.249752	NM_019501	ENSMUSG00000026784	Pdss1	2610203G20Rik|2700031G06Rik|TPT|TPT 1|Tprt|mDLP1|mSPS1	prenyl (solanesyl) diphosphate synthase, subunit 1	protein-coding
chr16-97	chr16	21648415	21648615	+	10.4	0.816	TTS (NM_001001881)	TTS (NM_001001881)	46150	NM_001001881	72190	Mm.131606	NM_001001881	ENSMUSG00000043391	2510009E07Rik	AI194952	RIKEN cDNA 2510009E07 gene	protein-coding
chr17-98	chr17	87491952	87492152	+	10.4	0.804	Intergenic	Intergenic	-45117	NM_007589	12314	Mm.329243	NM_007589	ENSMUSG00000036438	Calm2	1500001E21Rik|AL024017	calmodulin 2	protein-coding
chr5-153	chr5	43230155	43230355	+	10.4	0.784	intron (NR_028417, intron 1 of 7)	L2|LINE|L2	-3208	NM_175937	231207	Mm.7233	NM_175937	ENSMUSG00000039782	Cpeb2	A630055H10Rik|Cpe-bp2	cytoplasmic polyadenylation element binding protein 2	protein-coding
chr15-98	chr15	76879670	76879870	+	10.4	0.851	intron (NM_145916, intron 1 of 4)	intron (NM_145916, intron 1 of 4)	494	NM_145916	223669	Mm.38948	NM_145916	ENSMUSG00000033669	Zfp7	KRAB20|KRAB7|Krox-2|Zfp-7|Zfp65|Zfp80|Zfp86-rs1|mszf73-2	zinc finger protein 7	protein-coding
chr15-64	chr15	36164471	36164671	+	10.4	0.75	5' UTR (NM_001081253, exon 1 of 5)	5' UTR (NM_001081253, exon 1 of 5)	313	NM_001081253	78803	Mm.26393	NM_175281	ENSMUSG00000048230	Fbxo43	4930533G20Rik|Emi2	F-box protein 43	protein-coding
chr11-205	chr11	49710998	49711198	+	10.4	0.705	intron (NM_212484, intron 1 of 11)	intron (NM_212484, intron 1 of 11)	1624	NM_212484	104625	Mm.247113	NM_212484	ENSMUSG00000020362	Cnot6	CCR4	CCR4-NOT transcription complex, subunit 6	protein-coding
chr3-284	chr3	60480049	60480249	+	10.4	0.621	intron (NM_001253713, intron 2 of 9)	intron (NM_001253713, intron 2 of 9)	7319	NM_001253713	56758	Mm.255723	NM_020007	ENSMUSG00000027763	Mbnl1	Mbnl|mKIAA0428	muscleblind-like 1 (Drosophila)	protein-coding
chr13-131	chr13	52572522	52572722	+	10.4	0.627	intron (NR_046069, intron 1 of 3)	intron (NR_046069, intron 1 of 3)	603	NR_046069	100040572	Mm.278873	NR_046069		Gm2848	-	predicted gene 2848	ncRNA
chr17-454	chr17	83001164	83001364	+	10.4	0.759	Intergenic	Intergenic	76961	NR_045094	100503434	Mm.187281	NR_045094		Gm19689	-	predicted gene, 19689	ncRNA
chr6-309	chr6	67146835	67147035	+	10.4	0.638	Intergenic	Intergenic	-109528	NM_007836	13197	Mm.72235	NM_007836	ENSMUSG00000036390	Gadd45a	AA545191|Ddit1|GADD45	growth arrest and DNA-damage-inducible 45 alpha	protein-coding
chr6-324	chr6	113075041	113075241	+	10.4	0.656	intron (NR_027009, intron 1 of 1)	intron (NR_027009, intron 1 of 1)	2103	NR_027010	14910	Mm.280950	NR_027008	ENSMUSG00000086429	Gt(ROSA)26Sor	AV258896|Gtrgeo26|Gtrosa26|R26|ROSA26|Thumpd3as1	gene trap ROSA 26, Philippe Soriano	ncRNA
chr9-245	chr9	123861887	123862087	+	10.4	0.769	promoter-TSS (NM_011798)	promoter-TSS (NM_011798)	42	NM_011798	23832	Mm.390241	NM_011798	ENSMUSG00000060509	Xcr1	Ccxcr1|Gpr5|mXcr1	chemokine (C motif) receptor 1	protein-coding
chr5-253	chr5	123845905	123846105	+	10.4	0.759	Intergenic	B1_Mus2|SINE|Alu	19511	NM_030701	80885	Mm.440567	NM_030701	ENSMUSG00000045502	Hcar2	Gpr109a|Gpr109b|HM74|Niacr1|PUMA-G|Pumag|mHM74b	hydroxycarboxylic acid receptor 2	protein-coding
chr12-508	chr12	83666006	83666206	+	10.4	0.778	intron (NM_027349, intron 10 of 18)	intron (NM_027349, intron 10 of 18)	-22457	NM_008943	19164	Mm.998	NM_008943	ENSMUSG00000019969	Psen1	Ad3h|PS-1|PS1|S182	presenilin 1	protein-coding
chr14-129	chr14	122303964	122304164	+	10.4	0.886	intron (NM_029556, intron 1 of 7)	L1MB3|LINE|L1	-70426	NR_015532	68245	Mm.443285	NR_015532	ENSMUSG00000100585	1700108J01Rik	-	RIKEN cDNA 1700108J01 gene	ncRNA
chr13-194	chr13	55760519	55760719	+	10.4	0.811	intron (NM_028281, intron 2 of 3)	intron (NM_028281, intron 2 of 3)	-23960	NM_029772	76856	Mm.159795	NM_029772	ENSMUSG00000021499	Catsper3	4921522D01Rik|CACRC	cation channel, sperm associated 3	protein-coding
chr10-300	chr10	98704646	98704846	+	10.4	0.745	Intergenic	Intergenic	-210406	NM_026482	67972	Mm.166944	NM_026482	ENSMUSG00000019943	Atp2b1	2810442I22Rik|E130111D10Rik|Pmca1	ATPase, Ca++ transporting, plasma membrane 1	protein-coding
chr8-224	chr8	61643121	61643321	+	10.4	0.694	intron (NM_001293772, intron 10 of 21)	PB1D10|SINE|Alu	-52052	NM_001293774	72333	Mm.29933	NM_001081390	ENSMUSG00000058056	Palld	2410003B16Rik|6030492A02	palladin, cytoskeletal associated protein	protein-coding
chr5-586	chr5	71466380	71466580	+	10.4	0.891	intron (NM_030052, intron 2 of 2)	L1Md_F2|LINE|L1	81725	NM_030052	78174	Mm.60690	NM_030052	ENSMUSG00000049387	Cox7b2	4930503B16Rik	cytochrome c oxidase subunit VIIb2	protein-coding
chr14-55	chr14	52278832	52279032	+	10.4	0.82	promoter-TSS (NM_023434)	promoter-TSS (NM_023434)	-214	NM_023434	268741	Mm.246237	NM_023434	ENSMUSG00000016831	Tox4	5730589K01Rik|A630040M18|AA410149|LCP1	TOX high mobility group box family member 4	protein-coding
chr14-114	chr14	25472154	25472354	+	10.4	0.672	intron (NM_001310666, intron 1 of 23)	B1F|SINE|Alu	13069	NM_183208	328365	Mm.227484	NM_183208	ENSMUSG00000007817	Zmiz1	BC065120|E330020C23|ENSMUSG00000072684|Gm10397|I920194n01|Rai17|Zimp10	zinc finger, MIZ-type containing 1	protein-coding
chr14-45	chr14	66279469	66279669	+	10.4	0.782	intron (NM_172498, intron 1 of 29)	intron (NM_172498, intron 1 of 29)	1483	NM_172498	19229	Mm.21613	NM_172498	ENSMUSG00000059456	Ptk2b	CADTK|CAKB|CAKbeta|E430023O05Rik|FADK2|FAK2|PYK2|Raftk	PTK2 protein tyrosine kinase 2 beta	protein-coding
chr18-106	chr18	60782555	60782755	+	10.4	0.886	Intergenic	Intergenic	8059	NM_020600	20044	Mm.43778	NM_020600	ENSMUSG00000024608	Rps14	2600014J02Rik|AL023078	ribosomal protein S14	protein-coding
chr8-674	chr8	104022227	104022427	+	10.4	0.714	Intergenic	MTB_Mm|LTR|ERVL-MaLR	-79298	NM_009868	12562	Mm.21767	NM_009868	ENSMUSG00000031871	Cdh5	7B4|AA408225|Cd144|VE-Cad|VECD|VEcad|Vec	cadherin 5	protein-coding
chr15-81	chr15	78571600	78571800	+	10.4	0.683	intron (NM_009008, intron 1 of 6)	intron (NM_009008, intron 1 of 6)	1083	NM_009008	19354	Mm.1972	NM_009008	ENSMUSG00000033220	Rac2	AI323801|AI452260	RAS-related C3 botulinum substrate 2	protein-coding
chr1-235	chr1	170277103	170277303	+	10.4	0.833	promoter-TSS (NM_012009)	promoter-TSS (NM_012009)	-121	NM_012009	26904	Mm.57009	NM_012009	ENSMUSG00000102418	Sh2d1b1	EAT-2|EAT-2A|Eat2|Eat2a|Sh2d1b	SH2 domain containing 1B1	protein-coding
chr19-84	chr19	12442666	12442866	+	10.4	0.58	Intergenic	RMER1C|Other|Other	14861	NM_019540	56093	Mm.285849	NM_019540	ENSMUSG00000040065	Pfpl	Epcs5|Epcs50	pore forming protein-like	protein-coding
chr4-233	chr4	83199620	83199820	+	10.4	0.754	Intergenic	Intergenic	124469	NM_027238	69863	Mm.5540	NM_025782	ENSMUSG00000038172	Ttc39b	1810054D07Rik|9130422G05Rik|AI450603|AV103077|AW215585	tetratricopeptide repeat domain 39B	protein-coding
chr8-145	chr8	22634173	22634373	+	10.4	0.863	TTS (NR_027886)	TTS (NR_027886)	2536	NR_027886	68074	Mm.463136	NR_027886		A930013F10Rik	-	RIKEN cDNA A930013F10 gene	ncRNA
chr13-97	chr13	5978220	5978420	+	10.4	0.83	Intergenic	Intergenic	116831	NM_011803	23849	Mm.275036	NM_011803	ENSMUSG00000000078	Klf6	AI448727|BCD1|C86813|CPBP|Copeb|FM2|FM6|Ierepo1|Ierepo3|R75280|Zf9	Kruppel-like factor 6	protein-coding
chr16-95	chr16	10494386	10494586	+	10.4	0.652	intron (NM_001302619, intron 2 of 19)	RMER17C|LTR|ERVK	4705	NM_001243761	12265	Mm.249560	NM_007575	ENSMUSG00000022504	Ciita	C2ta|EG669998|Gm9475|Mhc2ta	class II transactivator	protein-coding
chr6-213	chr6	116631116	116631316	+	10.4	0.63	Intergenic	MTD|LTR|ERVL-MaLR	-2217	NM_026057	67255	Mm.18810	NM_026057	ENSMUSG00000059878	Zfp422	2900028O21Rik|AU041373|KOX15|Krox-25-2|Krox-26|Krox25|Krox26|Znf22	zinc finger protein 422	protein-coding
chr10-125	chr10	89585135	89585335	+	10.4	0.676	intron (NM_182959, intron 9 of 11)	intron (NM_182959, intron 9 of 11)	14580	NM_001310710	216227	Mm.233921	NM_182959	ENSMUSG00000019935	Slc17a8	BC042593|Vglut3	solute carrier family 17 (sodium-dependent inorganic phosphate cotransporter), member 8	protein-coding
chr14-180	chr14	14828565	14828765	+	10.4	0.808	intron (NM_001195229, intron 4 of 34)	intron (NM_001195229, intron 4 of 34)	7850	NM_001195229	674895	Mm.317563	NM_001034865	ENSMUSG00000042567	Nek10	Gm282	NIMA (never in mitosis gene a)- related kinase 10	protein-coding
chr17-203	chr17	7945178	7945378	+	10.4	0.705	promoter-TSS (NM_025789)	promoter-TSS (NM_025789)	-336	NM_025789	66832	Mm.29830	NM_025789	ENSMUSG00000073471	Rsph3a	1700012G05Rik|4930524H12Rik|R74860|Rshl2|Rshl2a	radial spoke 3A homolog (Chlamydomonas)	protein-coding
chr6-208	chr6	73059933	73060133	+	10.4	0.741	intron (NM_001164669, intron 61 of 76)	intron (NM_001164669, intron 61 of 76)	-101285	NM_001190327	19240	Mm.3532	NM_025284	ENSMUSG00000079523	Tmsb10	Ptmb10|Tb10	thymosin, beta 10	protein-coding
chr1-554	chr1	122490864	122491064	+	10.4	0.933	Intergenic	L1M4|LINE|L1	-922984	NM_025860	66942	Mm.44219	NM_025860	ENSMUSG00000001674	Ddx18	2310005B10Rik	DEAD (Asp-Glu-Ala-Asp) box polypeptide 18	protein-coding
chr2-173	chr2	163575484	163575684	+	10.4	0.589	Intergenic	Intergenic	-26730	NM_181734	76080	Mm.89828	NM_029512	ENSMUSG00000017679	Ttpal	3110080A02Rik|5830472M02Rik	tocopherol (alpha) transfer protein-like	protein-coding
chr4-365	chr4	102517880	102518080	+	10.4	0.774	intron (NM_019840, intron 5 of 14)	intron (NM_019840, intron 5 of 14)	-52080	NM_001177980	18578	Mm.20181	NM_019840	ENSMUSG00000028525	Pde4b	Dpde4|R74983|dunce	phosphodiesterase 4B, cAMP specific	protein-coding
chr11-346	chr11	73194083	73194283	+	10.4	0.729	intron (NM_031251, intron 2 of 10)	RMER15|LTR|ERVL	4836	NM_031251	83429	Mm.259852	NM_031251	ENSMUSG00000005949	Ctns	AI195360|AW049661	cystinosis, nephropathic	protein-coding
chr4-307	chr4	63403680	63403880	+	10.4	0.738	promoter-TSS (NM_001045514)	promoter-TSS (NM_001045514)	-335	NM_001045514	100182	Mm.387725	NM_001045514	ENSMUSG00000039158	Akna	AI597013	AT-hook transcription factor	protein-coding
chr2-234	chr2	122682174	122682374	+	10.4	0.722	3' UTR (NM_011774, exon 7 of 7)	3' UTR (NM_011774, exon 7 of 7)	20389	NM_011774	22785	Mm.27801	NM_011774	ENSMUSG00000005802	Slc30a4	Znt4|lm|znT-4	solute carrier family 30 (zinc transporter), member 4	protein-coding
chrX-28	chrX	164327092	164327292	+	10.4	0.878	intron (NM_027153, intron 5 of 9)	L1_Mm|LINE|L1	-46330	NM_001308489	14205	Mm.297978	NM_010216	ENSMUSG00000031380	Vegfd	AI325264|Figf|VEGF-D	vascular endothelial growth factor D	protein-coding
chr2-135	chr2	43545793	43545993	+	10.4	0.688	Intergenic	MLTR25C|LTR|ERVK	-9432	NM_001289593	70789	Mm.105278	NM_027552	ENSMUSG00000026866	Kynu	4432411A05Rik	kynureninase (L-kynurenine hydrolase)	protein-coding
chr11-211	chr11	72690726	72690926	+	10.4	0.8	intron (NM_009671, intron 1 of 24)	intron (NM_009671, intron 1 of 24)	824	NM_009671	11736	Mm.10313	NM_009671	ENSMUSG00000020790	Ankfy1	Ankhzn|ZFYVE14|mKIAA1255	ankyrin repeat and FYVE domain containing 1	protein-coding
chr11-147	chr11	50237488	50237688	+	10.4	0.691	intron (NM_001313968, intron 1 of 4)	intron (NM_001313968, intron 1 of 4)	944	NM_001313968	17001	Mm.245151	NM_008521	ENSMUSG00000020377	Ltc4s	-	leukotriene C4 synthase	protein-coding
chr5-666	chr5	139331944	139332144	+	10.4	0.811	Intergenic	B1_Mm|SINE|Alu	-6580	NM_172723	231821	Mm.297819	NM_172723	ENSMUSG00000056413	Adap1	4930431P11Rik|Centa1|GC1L|p42IP4	ArfGAP with dual PH domains 1	protein-coding
chr4-98	chr4	149518960	149519160	+	10.4	0.794	intron (NM_023465, intron 1 of 4)	intron (NM_023465, intron 1 of 4)	819	NM_023465	67087	Mm.299735	NM_023465	ENSMUSG00000028988	Ctnnbip1	1110008O09Rik|2310001I19Rik|AW457332|Catnbip1|Icat	catenin beta interacting protein 1	protein-coding
chr15-144	chr15	78848739	78848939	+	10.4	0.865	intron (NM_027219, intron 2 of 2)	intron (NM_027219, intron 2 of 2)	6192	NM_027219	104445	Mm.307488	NM_027219	ENSMUSG00000049521	Cdc42ep1	1810058K22Rik|AA980734|Borg5|CEP1|MSE55	CDC42 effector protein (Rho GTPase binding) 1	protein-coding
chr17-292	chr17	33840856	33841056	+	10.4	0.804	Intergenic	MLTR25A|LTR|ERVK	-2135	NM_019421	54219	Mm.11175	NM_019421	ENSMUSG00000002308	Cd320	425O18-1|8D6|D17Ertd716e|NG29|TCblR|VLDL	CD320 antigen	protein-coding
chr17-175	chr17	83346481	83346681	+	10.4	0.808	Intergenic	RLTR10|LTR|ERVK	-4350	NM_001114361	78798	Mm.295565	NM_199466	ENSMUSG00000032624	Eml4	4930443C24Rik|AI644019	echinoderm microtubule associated protein like 4	protein-coding
chr16-101	chr16	48827638	48827838	+	10.4	0.759	Intergenic	CT-rich|Low_complexity|Low_complexity	10882	NM_023881	57263	Mm.21123	NM_023881	ENSMUSG00000022650	Retnlb	9030012B21Rik|Fizz2|RELMbeta|Relmb|Xcp3	resistin like beta	protein-coding
chr6-195	chr6	94518258	94518458	+	10.4	0.717	intron (NM_026255, intron 3 of 9)	intron (NM_026255, intron 3 of 9)	18044	NM_026255	67582	Mm.280725	NM_026255	ENSMUSG00000045100	Slc25a26	4930433D19Rik|4933433F13Rik|AW557176|D6Bwg0781e|Slc25a6	solute carrier family 25 (mitochondrial carrier, phosphate carrier), member 26	protein-coding
chr15-97	chr15	76344469	76344669	+	10.4	0.8	intron (NM_025567, intron 2 of 6)	intron (NM_025567, intron 2 of 6)	1046	NM_025567	66445	Mm.29196	NM_025567	ENSMUSG00000022551	Cyc1	2610002H19Rik|AA408921|Cyct1	cytochrome c-1	protein-coding
chr15-73	chr15	64059303	64059503	+	10.4	0.7	intron (NM_144846, intron 1 of 11)	intron (NM_144846, intron 1 of 11)	1045	NM_144846	223601	Mm.246108	NM_144846	ENSMUSG00000022378	Fam49b	0910001A06Rik|AW122079	family with sequence similarity 49, member B	protein-coding
chr9-163	chr9	111033728	111033928	+	10.4	0.719	intron (NM_008522, intron 13 of 16)	intron (NM_008522, intron 13 of 16)	14536	NM_008522	17002	Mm.282359	NM_008522	ENSMUSG00000032496	Ltf	Csp82|Lf|MMS10R|Ms10r	lactotransferrin	protein-coding
chr12-274	chr12	78171826	78172026	+	10.4	0.719	Intergenic	Intergenic	-54729	NM_172952	268566	Mm.341742	NM_145965	ENSMUSG00000047454	Gphn	5730552E08Rik|AI662856|BC027112|C230040D23|GPH|GPHRYN|geph	gephyrin	protein-coding
chr6-244	chr6	55031278	55031478	+	10.4	0.792	Intergenic	RLTR13E|LTR|ERVK	-6623	NM_180678	353172	Mm.250004	NM_180678	ENSMUSG00000029777	Gars	GENA202|Gena201|Nmf249|Sgrp23	glycyl-tRNA synthetase	protein-coding
chr11-167	chr11	75153622	75153822	+	10.4	0.622	intron (NM_001002764, intron 15 of 18)	intron (NM_001002764, intron 15 of 18)	14430	NM_001098203	15248	Mm.57250	NM_010430	ENSMUSG00000043099	Hic1	AA408311|HIC-1	hypermethylated in cancer 1	protein-coding
chr15-108	chr15	58417314	58417514	+	10.4	0.704	intron (NM_145959, intron 1 of 23)	intron (NM_145959, intron 1 of 23)	1946	NM_145959	210998	Mm.3224	NM_145959	ENSMUSG00000037119	Fam91a1	AV220772|BC033609|D15Ertd621e|SKIN|mKIAA0493	family with sequence similarity 91, member A1	protein-coding
chr8-153	chr8	71596682	71596882	+	10.4	0.746	promoter-TSS (NM_001166213)	promoter-TSS (NM_001166213)	-864	NM_001166213	100037278	Mm.482159	NM_001166213	ENSMUSG00000043243	Fam129c	Bcnp1	family with sequence similarity 129, member C	protein-coding
chr1-470	chr1	171006801	171007001	+	10.4	0.776	Intergenic	Intergenic	-12025	NM_144559	246256	Mm.251254	NM_144559	ENSMUSG00000059089	Fcgr4	4833442P21Rik|CD16-2|FcgRIV|FcgammaRIV|Fcgr3a|Fcrl3	Fc receptor, IgG, low affinity IV	protein-coding
chr10-151	chr10	19290956	19291156	+	10.4	0.741	Intergenic	MTA_Mm|LTR|ERVL-MaLR	-65483	NM_053008	94222	Mm.156946	NM_053008	ENSMUSG00000045591	Olig3	Bhlhb7|bHLHe20|oligo3	oligodendrocyte transcription factor 3	protein-coding
chr16-80	chr16	45733309	45733509	+	10.4	0.875	intron (NR_073572, intron 3 of 4)	MTD|LTR|ERVL-MaLR	-8878	NM_019754	56370	Mm.24183	NM_019754	ENSMUSG00000022658	Tagln3	2700038H05Rik|2900005O10Rik|AI426007|Np25	transgelin 3	protein-coding
chr3-334	chr3	60409772	60409972	+	10.2	0.804	Intergenic	Intergenic	-62958	NM_001253713	56758	Mm.255723	NM_020007	ENSMUSG00000027763	Mbnl1	Mbnl|mKIAA0428	muscleblind-like 1 (Drosophila)	protein-coding
chr2-326	chr2	148751962	148752162	+	10.2	0.884	intron (NM_177655, intron 2 of 3)	intron (NM_177655, intron 2 of 3)	1701	NM_177655	228756	Mm.189390	NM_177655	ENSMUSG00000055177	Cstl1	RCET1|RCET2|RCET3	cystatin-like 1	protein-coding
chr9-118	chr9	15539826	15540026	+	10.2	0.786	intron (NM_133214, intron 2 of 2)	intron (NM_133214, intron 2 of 2)	34431	NM_133214	170748	Mm.86572	NM_133214	ENSMUSG00000058173	Smco4	Fn5	single-pass membrane protein with coiled-coil domains 4	protein-coding
chr6-597	chr6	114922873	114923073	+	10.2	0.936	Intergenic	B3|SINE|B2	-1221	NM_177683	232334	Mm.268357	NM_177683	ENSMUSG00000030315	Vgll4	BC048841|VGL-4	vestigial like family member 4	protein-coding
chr2-127	chr2	118259826	118260026	+	10.2	0.709	Intergenic	Intergenic	-2960	NM_027759	71313	Mm.85046	NM_027759	ENSMUSG00000027344	Fsip1	1700012M13Rik|4933432K11Rik	fibrous sheath-interacting protein 1	protein-coding
chr4-129	chr4	8774976	8775176	+	10.2	0.695	intron (NM_001277149, intron 2 of 37)	L2|LINE|L2	84670	NM_001277149	320790	Mm.138792	NM_001033395	ENSMUSG00000041235	Chd7	A730019I05Rik|Cycn|Cyn|Dz|Edy|Flo|GENA 47|GENA 60|Gena 52|Lda|Mt|Obt|Todo|WBE1|Whi|metis	chromodomain helicase DNA binding protein 7	protein-coding
chr19-94	chr19	38587615	38587815	+	10.2	0.765	intron (NM_019588, intron 1 of 31)	intron (NM_019588, intron 1 of 31)	63518	NM_019588	74055	Mm.34031	NM_019588	ENSMUSG00000024998	Plce1	4933403A21Rik|PLCepsilon|Plce|mKIAA1516	phospholipase C, epsilon 1	protein-coding
chr9-257	chr9	66305389	66305589	+	10.2	0.768	Intergenic	Intergenic	-44961	NM_145617	235439	Mm.244179	NM_145617	ENSMUSG00000038664	Herc1	2810449H11Rik|B230218H07|D130015N03Rik|tbl	HECT and RLD domain containing E3 ubiquitin protein ligase family member 1	protein-coding
chr6-332	chr6	126826751	126826951	+	10.2	0.778	intron (NM_025358, intron 9 of 10)	intron (NM_025358, intron 9 of 10)	22293	NM_025358	66108	Mm.29939	NM_025358	ENSMUSG00000000399	Ndufa9	1010001N11Rik	NADH dehydrogenase (ubiquinone) 1 alpha subcomplex, 9	protein-coding
chr8-192	chr8	86872570	86872770	+	10.2	0.719	intron (NM_030563, intron 1 of 6)	Lx7|LINE|L1	12588	NM_030563	80750	Mm.25117	NM_030563	ENSMUSG00000031652	N4bp1	AI481586|C81621	NEDD4 binding protein 1	protein-coding
chr4-122	chr4	102498175	102498375	+	10.2	0.792	intron (NM_001177983, intron 4 of 5)	intron (NM_001177983, intron 4 of 5)	-71785	NM_001177980	18578	Mm.20181	NM_019840	ENSMUSG00000028525	Pde4b	Dpde4|R74983|dunce	phosphodiesterase 4B, cAMP specific	protein-coding
chr10-320	chr10	21899051	21899251	+	10.2	0.833	intron (NM_001161845, intron 1 of 13)	ERVB7_1-LTR_MM|LTR|ERVK	16967	NM_001161845	20393	Mm.28405	NM_011361	ENSMUSG00000019970	Sgk1	Sgk	serum/glucocorticoid regulated kinase 1	protein-coding
chr6-285	chr6	113692893	113693093	+	10.2	0.818	intron (NM_001113553, intron 11 of 11)	RMER17C-int|LTR|ERVK	-4506	NM_001033463	381801	Mm.333322	NM_001033463	ENSMUSG00000056952	Tatdn2	AI646012|mKIAA0218	TatD DNase domain containing 2	protein-coding
chr6-269	chr6	35588844	35589044	+	10.2	0.833	Intergenic	L1Md_F2|LINE|L1	-49056	NM_008098	14489	Mm.182746	NM_008098	ENSMUSG00000029840	Mtpn	5033418D15Rik|Gcdp|V1	myotrophin	protein-coding
chr2-263	chr2	126496342	126496542	+	10.2	0.712	Intergenic	Intergenic	-4889	NM_001080944	241633	Mm.222235	NM_001080944	ENSMUSG00000060131	Atp8b4	A530043E15|Im	ATPase, class I, type 8B, member 4	protein-coding
chr6-489	chr6	47520640	47520840	+	10.2	0.792	intron (NM_012042, intron 16 of 21)	intron (NM_012042, intron 16 of 21)	66416	NM_012042	26965	Mm.87611	NM_012042	ENSMUSG00000029686	Cul1	-	cullin 1	protein-coding
chr19-76	chr19	26506897	26507097	+	10.2	0.788	Intergenic	MTD|LTR|ERVL-MaLR	-98163	NM_011416	67155	Mm.342988	NM_011416	ENSMUSG00000024921	Smarca2	2610209L14Rik|SNF2alpha|Snf2l2|brahma|brm	SWI/SNF related, matrix associated, actin dependent regulator of chromatin, subfamily a, member 2	protein-coding
chr6-265	chr6	148912263	148912463	+	10.2	0.82	Intergenic	RLTR45|LTR|ERVK	-16126	NM_181541	232560	Mm.150568	NM_181541	ENSMUSG00000030309	Caprin2	C1qdc1|Eeg1|rng140	caprin family member 2	protein-coding
chr18-200	chr18	48426649	48426849	+	10.2	0.833	Intergenic	Intergenic	381414	NM_001025388	433182	Mm.70666	NM_001025388	ENSMUSG00000059040	Eno1b	EG433182|Eno1|Gm5506	enolase 1B, retrotransposed	protein-coding
chr6-216	chr6	127463357	127463557	+	10.2	0.638	intron (NM_181402, intron 1 of 8)	intron (NM_181402, intron 1 of 8)	9734	NM_181402	101187	Mm.110818	NM_181402	ENSMUSG00000037997	Parp11	5330431N24Rik|AI851877|ARTD11|HIN1L|PARP-11	poly (ADP-ribose) polymerase family, member 11	protein-coding
chr1-180	chr1	75230421	75230621	+	10.2	0.809	intron (NM_001243090, intron 1 of 2)	MTD|LTR|ERVL-MaLR	1572	NM_001243090	381272	Mm.239588	NM_001243090	ENSMUSG00000096094	A630095N17Rik	Gm1624	RIKEN cDNA A630095N17 gene	protein-coding
chr15-82	chr15	79267902	79268102	+	10.2	0.75	intron (NM_177580, intron 7 of 13)	L1M5|LINE|L1	-13254	NM_020516	57274	Mm.441697	NM_020516	ENSMUSG00000032988	Slc16a8	Mct3	solute carrier family 16 (monocarboxylic acid transporters), member 8	protein-coding
chr11-239	chr11	116617064	116617264	+	10.2	0.75	intron (NM_172572, intron 1 of 18)	(GAAA)n|Simple_repeat|Simple_repeat	7088	NM_001167680	217344	Mm.89695	NM_172572	ENSMUSG00000020806	Rhbdf2	4732465I17Rik|Rhbdl6|cub	rhomboid 5 homolog 2	protein-coding
chr17-234	chr17	84169320	84169520	+	10.2	0.789	Intergenic	L1Md_F|LINE|L1	18527	NM_001001806	12193	Mm.259321	NM_001001806	ENSMUSG00000045817	Zfp36l2	Brf2|ERF2|Tis11d	zinc finger protein 36, C3H type-like 2	protein-coding
chr6-396	chr6	99427086	99427286	+	10.2	0.725	intron (NM_053202, intron 1 of 18)	intron (NM_053202, intron 1 of 18)	8159	NM_053202	108655	Mm.234965	NM_053202	ENSMUSG00000030067	Foxp1	3110052D19Rik|4932443N09Rik|AI461938|AW494214	forkhead box P1	protein-coding
chr3-126	chr3	102715812	102716012	+	10.2	0.644	Intergenic	Intergenic	-18858	NM_027533	70747	Mm.27469	NM_027533	ENSMUSG00000027858	Tspan2	6330415F13Rik|B230119D02Rik|tspan-2	tetraspanin 2	protein-coding
chr3-363	chr3	146845340	146845540	+	10.2	0.902	Intergenic	Intergenic	-6927	NM_001302957	70892	Mm.187793	NM_027594	ENSMUSG00000036745	Ttll7	1110049N09Rik|4921517B04Rik|C630030B20|mTTLL7	tubulin tyrosine ligase-like family, member 7	protein-coding
chr10-79	chr10	39613255	39613455	+	10.2	0.561	intron (NM_134000, intron 1 of 8)	intron (NM_134000, intron 1 of 8)	421	NM_134000	103213	Mm.436686	NM_134000	ENSMUSG00000019842	Traf3ip2	AI429613|Act1|CIKS	TRAF3 interacting protein 2	protein-coding
chr19-118	chr19	12555913	12556113	+	10.2	0.816	Intergenic	Intergenic	-17512	NM_026640	107373	Mm.1643	NM_026640	ENSMUSG00000024691	Fam111a	4632417K18Rik|AW413625	family with sequence similarity 111, member A	protein-coding
chr9-134	chr9	70453370	70453570	+	10.2	0.878	intron (NM_033604, intron 7 of 14)	intron (NM_033604, intron 7 of 14)	-31916	NM_007630	12442	Mm.22592	NM_007630	ENSMUSG00000032218	Ccnb2	CycB2	cyclin B2	protein-coding
chr8-225	chr8	68158460	68158660	+	10.2	0.714	Intergenic	Intergenic	-117968	NM_028182	72281	Mm.40974	NM_028182	ENSMUSG00000053886	Sh2d4a	2210402M20Rik|SH2A	SH2 domain containing 4A	protein-coding
chr14-220	chr14	61693424	61693624	+	10.2	0.76	Intergenic	L1ME4a|LINE|L1	-11151	NR_028264	668253	Mm.32886	NR_028264	ENSMUSG00000097589	Dleu2	1810047A16Rik|4932411A06Rik|7730401J12Rik|AI197277|AI788824|Alt1|Gm9069|Leu2	deleted in lymphocytic leukemia, 2	ncRNA
chr11-188	chr11	3172971	3173171	+	10.2	0.913	intron (NM_030207, intron 6 of 32)	B3A|SINE|B2	20392	NM_030207	78887	Mm.394071	NM_030207	ENSMUSG00000023764	Sfi1	-	Sfi1 homolog, spindle assembly associated (yeast)	protein-coding
chr4-102	chr4	151045001	151045201	+	10.2	0.8	promoter-TSS (NM_001289878)	promoter-TSS (NM_001289878)	-436	NM_001289878	18628	Mm.121361	NM_011067	ENSMUSG00000028957	Per3	2810049O06Rik|mPer3	period circadian clock 3	protein-coding
chr7-227	chr7	104348228	104348428	+	10.2	0.75	exon (NM_001146007, exon 2 of 8)	exon (NM_001146007, exon 2 of 8)	5021	NM_175677	319236	Mm.425502	NM_175677	ENSMUSG00000057143	Trim12c	9230105E10Rik|Trim12-2	tripartite motif-containing 12C	protein-coding
chr6-846	chr6	113047853	113048053	+	10.2	0.639	intron (NM_008188, intron 2 of 9)	intron (NM_008188, intron 2 of 9)	1626	NM_008188	14911	Mm.781	NM_008188	ENSMUSG00000030264	Thumpd3	AW556087|Gt(ROSA)26asSor|Gtrosa26as	THUMP domain containing 3	protein-coding
chr10-121	chr10	77522109	77522309	+	10.2	0.724	Intergenic	Intergenic	-6396	NM_133998	108707	Mm.259547	NM_133998	ENSMUSG00000032977	Fam207a	1810008A18Rik|AI303072	family with sequence similarity 207, member A	protein-coding
chr2-394	chr2	165287195	165287395	+	10.2	0.655	TTS (NM_207706)	TTS (NM_207706)	492	NM_001252574	228875	Mm.21184	NM_144893	ENSMUSG00000017664	Slc35c2	C85957|CGI-15|D2Wsu58e|Ovcov1	solute carrier family 35, member C2	protein-coding
chr12-213	chr12	4885182	4885382	+	10.2	0.655	intron (NM_145441, intron 5 of 6)	RLTR15|LTR|ERVK	-10923	NM_001033488	432628	Mm.154078	NM_001033488	ENSMUSG00000037336	Mfsd2b	Gm1964	major facilitator superfamily domain containing 2B	protein-coding
chr19-53	chr19	38930548	38930748	+	10.2	0.766	promoter-TSS (NM_008234)	promoter-TSS (NM_008234)	-342	NM_008234	15201	Mm.57223	NM_008234	ENSMUSG00000025001	Hells	AI323785|E130115I21Rik|LSH|Lysh|PASG|YFK8	helicase, lymphoid specific	protein-coding
chr7-139	chr7	43352305	43352505	+	10.2	0.649	exon (NM_145581, exon 4 of 10)	exon (NM_145581, exon 4 of 10)	1064	NM_145581	233186	Mm.290569	NM_145581	ENSMUSG00000039013	Siglecf	Siglec5|mSiglec-F	sialic acid binding Ig-like lectin F	protein-coding
chr14-73	chr14	105258326	105258526	+	10.2	0.784	promoter-TSS (NM_029561)	promoter-TSS (NM_029561)	-247	NM_029561	76273	Mm.290669	NM_029561	ENSMUSG00000053253	Ndfip2	0710001O20Rik|2810436B12Rik|9130207N19Rik|N4wbp5a|mKIAA1165	Nedd4 family interacting protein 2	protein-coding
chr12-234	chr12	75756311	75756511	+	10.2	0.729	Intergenic	GA-rich|Low_complexity|Low_complexity	-20682	NM_030750	81535	Mm.280199	NM_030750	ENSMUSG00000021054	Sgpp1	AI463453|SPP|SPP1|Spph1	sphingosine-1-phosphate phosphatase 1	protein-coding
chr11-401	chr11	29376420	29376620	+	10.2	0.683	intron (NM_176841, intron 2 of 31)	intron (NM_176841, intron 2 of 31)	2348	NM_176841	108686	Mm.338284	NM_176841	ENSMUSG00000032740	Ccdc88a	A430106J12Rik|AI848406|Ape|C130096N06Rik|C330012F17Rik|D130005J21Rik|Girdin|Giv|Grdn|Hkrp1	coiled coil domain containing 88A	protein-coding
chr17-361	chr17	50955316	50955516	+	10.2	0.731	intron (NM_028162, intron 8 of 21)	intron (NM_028162, intron 8 of 21)	203962	NM_001285993	72238	Mm.120650	NM_028162	ENSMUSG00000023923	Tbc1d5	1600014N05Rik	TBC1 domain family, member 5	protein-coding
chr7-195	chr7	67239036	67239236	+	10.2	0.87	intron (NM_001291192, intron 9 of 10)	intron (NM_001291192, intron 9 of 10)	16520	NM_001191051	75099	Mm.121691	NM_175215	ENSMUSG00000043831	Lysmd4	4930506D23Rik	LysM, putative peptidoglycan-binding, domain containing 4	protein-coding
chr14-136	chr14	75867001	75867201	+	10.2	0.667	Intergenic	Intergenic	19178	NR_028481	100303751	Mm.484707	NR_028481	ENSMUSG00000065147	Snora31	MBI-161	small nucleolar RNA, H/ACA box 31	snoRNA
chr12-565	chr12	77102291	77102491	+	10.2	0.8	Intergenic	Intergenic	-135713	NM_001252614	53618	Mm.35628	NM_016893	ENSMUSG00000021065	Fut8	-	fucosyltransferase 8	protein-coding
chr8-138	chr8	84070238	84070438	+	10.2	0.672	intron (NM_009055, intron 1 of 20)	intron (NM_009055, intron 1 of 20)	3502	NM_009055	19724	Mm.7892	NM_009055	ENSMUSG00000031706	Rfx1	AI047719|AI385641	regulatory factor X, 1 (influences HLA class II expression)	protein-coding
chr10-234	chr10	91189143	91189343	+	10.2	0.723	Intergenic	RLTR41|LTR|ERV1	-17624	NM_001080130	21917	Mm.159684	NM_011605	ENSMUSG00000019961	Tmpo	5630400D24Rik|AI195756|AI606875|AW214352|AW547477|LAP2|TP	thymopoietin	protein-coding
chr12-196	chr12	16134608	16134808	+	10.2	0.782	Intergenic	Intergenic	-317923	NM_144551	217410	Mm.491136	NM_144551	ENSMUSG00000020601	Trib2	AW319517|TRB-2|TRB2	tribbles pseudokinase 2	protein-coding
chr11-210	chr11	72635801	72636001	+	10.2	0.689	intron (NM_025985, intron 1 of 5)	L2a|LINE|L2	28640	NM_025985	67128	Mm.458052	NM_025985	ENSMUSG00000020794	Ube2g1	2700059C12Rik|AI256795|AU014992|AW552068|D130023C12Rik	ubiquitin-conjugating enzyme E2G 1	protein-coding
chr8-201	chr8	128181443	128181643	+	10.2	0.87	Intergenic	Intergenic	96682	NR_105822	102465212		NR_105822	ENSMUSG00000099326	Mir21c	Gm28013|mmu-mir-21c	microRNA 21c	ncRNA
chr1-160	chr1	59400253	59400453	+	10.2	0.661	Intergenic	Intergenic	-81794	NM_008057	14369	Mm.297906	NM_008057	ENSMUSG00000041075	Fzd7	Fz7	frizzled class receptor 7	protein-coding
chr4-170	chr4	146456644	146456844	+	10.2	0.627	intron (NM_001083918, intron 4 of 6).2	RMER17C-int|LTR|ERVK	7714	NM_001085522	433791	Mm.276881	NM_001085522	ENSMUSG00000070605	Zfp992	Gm13251|OTTMUSG00000011097	zinc finger protein 992	protein-coding
chr6-322	chr6	108536982	108537182	+	9.9	0.707	intron (NM_010585, intron 60 of 61)	intron (NM_010585, intron 60 of 61)	47339	NR_106121	102465766		NR_106121	ENSMUSG00000105697	Mir7661	mmu-mir-7661	microRNA 7661	ncRNA
chr15-68	chr15	9562543	9562743	+	9.9	0.803	Intergenic	Intergenic	-32767	NM_008372	16197	Mm.389	NM_008372	ENSMUSG00000003882	Il7r	CD127|IL-7Ralpha	interleukin 7 receptor	protein-coding
chr6-452	chr6	97804558	97804758	+	9.9	0.709	Intergenic	Intergenic	-2400	NM_001113198	17342	Mm.333284	NM_008601	ENSMUSG00000035158	Mitf	BCC2|Bhlhe32|Gsfbcc2|Vitiligo|Wh|bw|mi|vit	microphthalmia-associated transcription factor	protein-coding
chr4-145	chr4	106622229	106622429	+	9.9	0.642	promoter-TSS (NM_177667)	promoter-TSS (NM_177667)	-120	NM_177667	230576	Mm.41945	NM_177667	ENSMUSG00000034919	Ttc22	4732467L16Rik	tetratricopeptide repeat domain 22	protein-coding
chr3-146	chr3	37538487	37538687	+	9.9	0.811	intron (NM_001310473, intron 16 of 16)	L1VL2|LINE|L1	-71304	NR_130162	75947	Mm.109620	NR_130161	ENSMUSG00000085677	4930594O21Rik	-	RIKEN cDNA 4930594O21 gene	ncRNA
chr4-114	chr4	138883776	138883976	+	9.9	0.695	Intergenic	Intergenic	5934	NM_012044	26970	Mm.296007	NM_012044	ENSMUSG00000028751	Pla2g2e	-	phospholipase A2, group IIE	protein-coding
chr8-415	chr8	80514933	80515133	+	9.9	0.881	Intergenic	L1Md_T|LINE|L1	20988	NM_010369	14934	Mm.13123	NM_010369	ENSMUSG00000051839	Gypa	AI853584|CD235a|GPA	glycophorin A	protein-coding
chr14-184	chr14	30825300	30825500	+	9.9	0.83	promoter-TSS (NM_028839)	promoter-TSS (NM_028839)	-194	NM_028839	69179	Mm.143025	NM_028839	ENSMUSG00000006526	Tmem110	1810038N08Rik|2310014H19Rik|AW554125|STIMATE	transmembrane protein 110	protein-coding
chr14-104	chr14	48446722	48446922	+	9.9	0.841	intron (NM_172600, intron 1 of 15)	intron (NM_172600, intron 1 of 15)	470	NR_132324	218989	Mm.85211	NM_172600	ENSMUSG00000036339	Tmem260	5930435P15|6720456H20Rik	transmembrane protein 260	protein-coding
chr8-219	chr8	19670965	19671165	+	9.9	0.736	Intergenic	Intergenic	-58511	NM_001270553	100861668	Mm.491087	NM_001270553	ENSMUSG00000095294	Gm21119	-	predicted gene, 21119	protein-coding
chr2-207	chr2	168566653	168566853	+	9.9	0.852	intron (NR_111897, intron 2 of 5)	intron (NR_111897, intron 2 of 5)	23612	NM_001291178	18019	Mm.116802	NM_010899	ENSMUSG00000027544	Nfatc2	AI607462|NF-ATc2|NF-ATp|NFAT1|NFAT1-D|Nfatp	nuclear factor of activated T cells, cytoplasmic, calcineurin dependent 2	protein-coding
chr3-137	chr3	105851864	105852064	+	9.9	0.788	Intergenic	RLTR11C_MM|LTR|ERVK	-18894	NM_027025	69296	Mm.235024	NM_027025	ENSMUSG00000000562	Tmigd3	1700001d09rik|4930578J19Rik	transmembrane and immunoglobulin domain containing 3	protein-coding
chr3-229	chr3	98087113	98087313	+	9.9	0.857	intron (NM_010928, intron 5 of 33)	intron (NM_010928, intron 5 of 33)	-73599	NM_027665	71078	Mm.50711	NM_027665	ENSMUSG00000043468	Adam30	4933424D07Rik|svph4	a disintegrin and metallopeptidase domain 30	protein-coding
chr17-142	chr17	79000047	79000247	+	9.9	0.745	intron (NM_029239, intron 2 of 18)	intron (NM_029239, intron 2 of 18)	8358	NM_001171005	75292	Mm.252776	NM_029239	ENSMUSG00000024070	Prkd3	4930557O20Rik|5730497N19Rik|PKD3|Pkcnu|Prkcn	protein kinase D3	protein-coding
chr16-158	chr16	93450986	93451186	+	9.9	0.691	intron (NR_040494, intron 1 of 2)	intron (NR_040494, intron 1 of 2)	7786	NR_040494	72264	Mm.396204	NR_040494	ENSMUSG00000099968	1700029J03Rik	-	RIKEN cDNA 1700029J03 gene	ncRNA
chr7-591	chr7	97931846	97932046	+	9.9	0.769	intron (NM_177696, intron 1 of 17)	L1_Mus1|LINE|L1	11988	NM_177696	233537	Mm.375772	NM_177696	ENSMUSG00000035582	Gdpd4	4921513O04	glycerophosphodiester phosphodiesterase domain containing 4	protein-coding
chr14-165	chr14	51184013	51184213	+	9.9	0.833	Intergenic	RLTR26C_MM|LTR|ERVK	11810	NM_007449	11731	Mm.377077	NM_007449	ENSMUSG00000047894	Ang2	Angrp|Raa3|Rnase5b	angiogenin, ribonuclease A family, member 2	protein-coding
chr3-424	chr3	135117480	135117680	+	9.9	0.615	Intergenic	(GAAA)n|Simple_repeat|Simple_repeat	-94983	NM_173762	229841	Mm.161470	NM_173762	ENSMUSG00000045328	Cenpe	312kDa|AU019344|BC049989|C530022J18|CENP-E|Kif10	centromere protein E	protein-coding
chr11-283	chr11	86686696	86686896	+	9.9	0.841	intron (NM_001098810, intron 1 of 1)	intron (NM_001098810, intron 1 of 1)	2715	NM_001098810	217057	Mm.24868	NM_175004	ENSMUSG00000072582	Ptrh2	A230072I16Rik|Bit1|CGI-147	peptidyl-tRNA hydrolase 2	protein-coding
chr6-255	chr6	124718660	124718860	+	9.9	0.848	promoter-TSS (NR_029554)	promoter-TSS (NR_029554)	-370	NR_029792	723944		NR_029792	ENSMUSG00000065462	Mir200c	Mirn200c|mir-200c	microRNA 200c	ncRNA
chr3-189	chr3	103277834	103278034	+	9.9	0.724	Intergenic	Intergenic	-1359	NM_053170	94093	Mm.195036	NM_053170	ENSMUSG00000033014	Trim33	8030451N04Rik|AI413936|Ecto|Tif1g	tripartite motif-containing 33	protein-coding
chr7-254	chr7	101055489	101055689	+	9.9	0.905	Intergenic	RSINE1|SINE|B4	-43536	NM_001302346	18442	Mm.3000	NM_008773	ENSMUSG00000032860	P2ry2	P2U1|P2Y2	purinergic receptor P2Y, G-protein coupled 2	protein-coding
chr6-829	chr6	90483439	90483639	+	9.9	0.833	Intergenic	Intergenic	20913	NM_023184	66277	Mm.38343	NM_023184	ENSMUSG00000030087	Klf15	1810013I09Rik|AV048136|AW494632|CKLF|KKLF	Kruppel-like factor 15	protein-coding
chr19-100	chr19	3975878	3976078	+	9.9	0.788	intron (NM_001177438, intron 1 of 9)	RMER17C2|LTR|ERVK	3650	NM_001177438	621603	Mm.34137	NM_001177438	ENSMUSG00000075296	Aldh3b2	AI848594|C130048D07Rik	aldehyde dehydrogenase 3 family, member B2	protein-coding
chr14-76	chr14	77030888	77031088	+	9.9	0.86	intron (NM_172488, intron 5 of 7)	intron (NM_172488, intron 5 of 7)	5629	NM_172488	210808	Mm.89278	NM_172488	ENSMUSG00000044350	Lacc1	9030625A04Rik	laccase (multicopper oxidoreductase) domain containing 1	protein-coding
chr7-375	chr7	97825261	97825461	+	9.9	0.935	Intergenic	Lx5c|LINE|L1	-17578	NM_011035	18479	Mm.260227	NM_011035	ENSMUSG00000030774	Pak1	AW045634|PAK-1|Paka	p21 protein (Cdc42/Rac)-activated kinase 1	protein-coding
chr12-820	chr12	11135722	11135922	+	9.9	0.87	intron (NM_001168564, intron 1 of 2)	intron (NM_001168564, intron 1 of 2)	14551	NM_173417	238076	Mm.113278	NM_173417	ENSMUSG00000043673	Kcns3	-	potassium voltage-gated channel, delayed-rectifier, subfamily S, member 3	protein-coding
chr12-1017	chr12	50188785	50188985	+	9.9	0.929	Intergenic	Intergenic	460338	NM_008858	18760	Mm.133719	NM_008858	ENSMUSG00000002688	Prkd1	PKD|PKD1|Pkcm|Prkcm	protein kinase D1	protein-coding
chr3-246	chr3	64235539	64235739	+	9.9	0.867	Intergenic	RLTR45|LTR|ERVK	51778	NM_001104614	637004	Mm.469887	NM_001104614	ENSMUSG00000091572	Vmn2r3	EG637004	vomeronasal 2, receptor 3	protein-coding
chr10-216	chr10	128410605	128410805	+	9.9	0.679	promoter-TSS (NM_027257)	promoter-TSS (NM_027257)	-909	NM_027257	69917	Mm.46614	NM_027257	ENSMUSG00000025374	Nabp2	2610036N15Rik|Obfc2b|SSB1	nucleic acid binding protein 2	protein-coding
chr5-221	chr5	113981190	113981390	+	9.9	0.86	intron (NM_198109, intron 2 of 14)	intron (NM_198109, intron 2 of 14)	12467	NM_198109	231637	Mm.389682	NM_198109	ENSMUSG00000042121	Ssh1	AW551225|Gm1394|Gm1395|SSH-1|SSH-1L	slingshot homolog 1 (Drosophila)	protein-coding
chr1-306	chr1	43843401	43843601	+	9.9	0.723	Intergenic	Intergenic	-15793	NM_026430	67883	Mm.387202	NM_026430	ENSMUSG00000057363	Uxs1	1600025I13Rik|AI451869|AI649125|AW550562	UDP-glucuronate decarboxylase 1	protein-coding
chr16-215	chr16	38200507	38200707	+	9.9	0.755	intron (NM_019827, intron 7 of 10)	intron (NM_019827, intron 7 of 10)	94217	NM_010936	18171	Mm.8509	NM_010936	ENSMUSG00000022809	Nr1i2	PXR|PXR.1|PXR.2|PXR1|SXR|mPXR	nuclear receptor subfamily 1, group I, member 2	protein-coding
chr5-139	chr5	88834334	88834534	+	9.9	0.776	Intergenic	Intergenic	-52826	NM_001197147	54403	Mm.41044	NM_018760	ENSMUSG00000060961	Slc4a4	AI835705|NBC|NBC1	solute carrier family 4 (anion exchanger), member 4	protein-coding
chr19-104	chr19	47136906	47137106	+	9.9	0.724	intron (NM_133746, intron 1 of 2)	intron (NM_133746, intron 1 of 2)	1288	NM_133746	72691	Mm.31663	NM_133746	ENSMUSG00000033033	Calhm2	2810048G17Rik|Fam26b	calcium homeostasis modulator 2	protein-coding
chr11-355	chr11	115403568	115403768	+	9.9	0.776	promoter-TSS (NM_026729)	promoter-TSS (NM_026729)	-98	NM_026729	68572	Mm.271062	NM_026729	ENSMUSG00000018858	Mrpl58	1110001A02Rik|1110002E03Rik|Ict1|MRP-L58	mitochondrial ribosomal protein L58	protein-coding
chr8-139	chr8	85570409	85570609	+	9.9	0.724	Intergenic	(GA)n|Simple_repeat|Simple_repeat	-15238	NM_019794	56445	Mm.475573	NM_019794	ENSMUSG00000031701	Dnaja2	1500017M13Rik|2010206B19Rik|DNAJ|DNJ3|Dnaj3|HIRIP4|PRO3015|mDj3	DnaJ heat shock protein family (Hsp40) member A2	protein-coding
chr8-202	chr8	10840537	10840737	+	9.9	0.717	Intergenic	Intergenic	41817	NR_040705	320014	Mm.403203	NR_040705	ENSMUSG00000109473	B930025P03Rik	-	RIKEN cDNA B930025P03 gene	ncRNA
chr4-456	chr4	147809275	147809475	+	9.9	0.72	intron (NM_001127189, intron 1 of 5)	intron (NM_001127189, intron 1 of 5)	413	NM_001127189	100041677	Mm.327194	NM_001127189	ENSMUSG00000078495	Zfp984	Gm13157|OTTMUSG00000010679	zinc finger protein 984	protein-coding
chr8-320	chr8	46880867	46881067	+	9.9	0.732	Intergenic	Intergenic	-105958	NM_177304	320981	Mm.211429	NM_177304	ENSMUSG00000038173	Enpp6	4833421B01Rik|B830047L21Rik|D8Ertd514e|E-NPP 6|GPC-Cpde|Npp6	ectonucleotide pyrophosphatase/phosphodiesterase 6	protein-coding
chr11-515	chr11	20744316	20744516	+	9.9	0.8	Intergenic	MER20|DNA|hAT-Charlie	-2860	NM_181411	216549	Mm.356580	NM_181411	ENSMUSG00000049659	Aftph	-	aftiphilin	protein-coding
chr13-145	chr13	92128149	92128349	+	9.9	0.844	Intergenic	Intergenic	-140207	NM_009027	19418	Mm.248630	NM_009027	ENSMUSG00000021708	Rasgrf2	6330417G04Rik|AW048350|Grf2|Ras-GRF2	RAS protein-specific guanine nucleotide-releasing factor 2	protein-coding
chr6-385	chr6	73133878	73134078	+	9.9	0.886	intron (NM_001164669, intron 32 of 76)	intron (NM_001164669, intron 32 of 76)	87653	NM_001164669	330355	Mm.333166	NM_001164669	ENSMUSG00000052861	Dnah6	9830168K20|A730004I20Rik|Dnahc6|mKIAA1697|mdhc6	dynein, axonemal, heavy chain 6	protein-coding
chr15-110	chr15	74709262	74709462	+	9.9	0.812	promoter-TSS (NM_008415)	promoter-TSS (NM_008415)	-40	NM_008415	16469	Mm.87052	NM_008415	ENSMUSG00000046380	Jrk	-	jerky	protein-coding
chr5-135	chr5	15689803	15690003	+	9.9	0.826	intron (NR_001585, intron 1 of 4)	intron (NR_001585, intron 1 of 4)	9193	NR_001585	75858	Mm.359463	NR_001585	ENSMUSG00000089871	Speer4cos	4930568L21Rik|SPEER-7|Speer7-ps|Speer7-ps1	spermatogenesis associated glutamate (E)-rich protein 4C, opposite strand transcript	pseudo
chr13-174	chr13	105326973	105327173	+	9.9	0.685	Intergenic	Lx9|LINE|L1	-34059	NM_027934	71816	Mm.317015	NM_027934	ENSMUSG00000021720	Rnf180	3110001E11Rik|Rines	ring finger protein 180	protein-coding
chr6-171	chr6	137011240	137011440	+	9.9	0.75	Intergenic	Intergenic	56817	NM_023898	78600	Mm.290622	NM_023898	ENSMUSG00000064330	Pde6h	A930033D18Rik|PDEgamma	phosphodiesterase 6H, cGMP-specific, cone, gamma	protein-coding
chr19-70	chr19	11966225	11966425	+	9.9	0.843	intron (NM_001033174, intron 1 of 13)	CpG	481	NM_001033174	76303	Mm.291279	NM_001033174	ENSMUSG00000024687	Osbp	1110018F06Rik|AW559088|mKIAA4220	oxysterol binding protein	protein-coding
chr2-526	chr2	144007309	144007509	+	9.9	0.778	intron (NM_024281, intron 1 of 23)	B3|SINE|B2	3854	NM_133626	81910	Mm.13705	NM_024281	ENSMUSG00000027422	Rrbp1	1700087N07Rik|5730465C04Rik|ES/130|mKIAA1398|mRRp0|mRRp1.8|mRRp10|mRRp15a|mRRp15b|mRRp16.8|mRRp2|mRRp41|mRRp47|mRRp5.4|p180	ribosome binding protein 1	protein-coding
chr18-65	chr18	82953069	82953269	+	9.9	0.784	intron (NM_001177464, intron 1 of 5)	intron (NM_001177464, intron 1 of 5)	-32609	NR_033307	75853	Mm.420737	NR_033307		4930592I03Rik	-	RIKEN cDNA 4930592I03 gene	ncRNA
chr4-126	chr4	134160162	134160362	+	9.9	0.816	intron (NM_144527, intron 3 of 13)	RLTR4_MM-int|LTR|ERV1	26823	NM_144527	70012	Mm.26542	NM_144527	ENSMUSG00000037443	Cep85	2410030J07Rik|AI173272|AI173504|Ccdc21	centrosomal protein 85	protein-coding
chr9-209	chr9	94669295	94669495	+	9.9	0.548	promoter-TSS (NM_177909)	promoter-TSS (NM_177909)	-497	NM_177909	331004	Mm.326125	NM_177909	ENSMUSG00000031129	Slc9a9	5730527A11Rik|9930105B05|AI854429|Nhe9	solute carrier family 9 (sodium/hydrogen exchanger), member 9	protein-coding
chr19-120	chr19	37493944	37494144	+	9.9	0.792	Intergenic	(TC)n|Simple_repeat|Simple_repeat	28790	NR_131009	78640	Mm.234265	NR_131008		1700122C19Rik	-	RIKEN cDNA 1700122C19 gene	ncRNA
chr15-173	chr15	76380601	76380801	+	9.9	0.765	intron (NM_175457, intron 1 of 43)	intron (NM_175457, intron 1 of 43)	188	NM_175457	223658	Mm.123240	NM_175457	ENSMUSG00000022558	Mroh1	D330001F17Rik|Heatr7a	maestro heat-like repeat family member 1	protein-coding
chr2-237	chr2	156190957	156191157	+	9.9	0.826	Intergenic	B1_Mus2|SINE|Alu	-5590	NM_172674	228829	Mm.427078	NM_172674	ENSMUSG00000038116	Phf20	6820402O20Rik	PHD finger protein 20	protein-coding
chr3-204	chr3	52000561	52000761	+	9.9	0.83	intron (NM_001004176, intron 1 of 4)	intron (NM_001004176, intron 1 of 4)	104345	NM_001004176	433586	Mm.234972	NM_001004176	ENSMUSG00000061143	Maml3	AV234550|BC049812|Mam-2|mKIAA1816	mastermind like 3 (Drosophila)	protein-coding
chr2-104	chr2	119237288	119237488	+	9.9	0.738	promoter-TSS (NM_016907)	promoter-TSS (NM_016907)	28	NM_016907	20732	Mm.104955	NM_016907	ENSMUSG00000027315	Spint1	HAI-1	serine protease inhibitor, Kunitz type 1	protein-coding
chr12-405	chr12	84833488	84833688	+	9.9	0.812	intron (NM_013589, intron 3 of 34)	(TTTTG)n|Simple_repeat|Simple_repeat	-42214	NR_028577	100303738	Mm.479389	NR_028577		D030025P21Rik	-	RIKEN cDNA D030025P21 gene	ncRNA
chr7-287	chr7	98726599	98726799	+	9.9	0.929	Intergenic	Intergenic	23336	NM_028410	72981	Mm.4428	NM_028410	ENSMUSG00000030753	Thap12	2900052B10Rik|Dap4|Prkrir|Rpkrir	THAP domain containing 12	protein-coding
chr16-232	chr16	92803571	92803771	+	9.9	0.837	intron (NM_001111022, intron 2 of 6)	intron (NM_001111022, intron 2 of 6)	22403	NM_001111021	12394	Mm.4081	NM_009821	ENSMUSG00000022952	Runx1	AML1|CBF-alpha-2|Cbfa2|Pebp2a2|Pebpa2b	runt related transcription factor 1	protein-coding
chr13-133	chr13	93187937	93188137	+	9.9	0.833	intron (NM_133905, intron 1 of 14)	intron (NM_133905, intron 1 of 14)	4246	NM_133905	100715	Mm.242865	NM_133905	ENSMUSG00000042167	Papd4	8030446C20Rik|AI649009|GLD-2|Gld2	PAP associated domain containing 4	protein-coding
chr17-110	chr17	44351274	44351474	+	9.9	0.745	Intergenic	Intergenic	162802	NM_172621	224796	Mm.37666	NM_172621	ENSMUSG00000023959	Clic5	5730531E12Rik|B330005L24|Gm322|jbg	chloride intracellular channel 5	protein-coding
chr10-388	chr10	79991776	79991976	+	9.9	0.95	intron (NM_007725, intron 2 of 6)	intron (NM_007725, intron 2 of 6)	3276	NM_007725	12798	Mm.157770	NM_007725	ENSMUSG00000004665	Cnn2	AA408047|AI324678|Calpo2	calponin 2	protein-coding
chr17-82	chr17	33413100	33413300	+	9.9	0.763	Intergenic	L1_Mus2|LINE|L1	-18563	NM_009542	22643	Mm.4417	NM_009542	ENSMUSG00000055240	Zfp101	AI316498|AI325003	zinc finger protein 101	protein-coding
chr1-168	chr1	171069656	171069856	+	9.9	0.796	Intergenic	Intergenic	-5104	NR_106103	102466998		NR_106103	ENSMUSG00000099119	Mir6546	Gm27408|mmu-mir-6546	microRNA 6546	ncRNA
chr13-100	chr13	51100307	51100507	+	9.9	0.671	promoter-TSS (NM_001283030)	promoter-TSS (NM_001283030)	320	NR_029463	77428	Mm.405630	NR_029463		9430083A17Rik	-	RIKEN cDNA 9430083A17 gene	ncRNA
chr2-143	chr2	30929651	30929851	+	9.9	0.782	Intergenic	Intergenic	-23250	NM_133673	30934	Mm.249164	NM_133673	ENSMUSG00000026848	Tor1b	2610016F05Rik|DQ1|torsinB	torsin family 1, member B	protein-coding
chr12-304	chr12	95947288	95947488	+	9.9	0.788	Intergenic	L1Md_F2|LINE|L1	99834	NR_103800	69423	Mm.46121	NM_027076		1700019M22Rik	-	NFX-like protein	pseudo
chr6-447	chr6	84661740	84661940	+	9.9	0.717	intron (NM_177077, intron 20 of 21)	intron (NM_177077, intron 20 of 21)	-67932	NM_001177713	232174	Mm.255246	NM_175475	ENSMUSG00000063415	Cyp26b1	CP26|P450RAI-2	cytochrome P450, family 26, subfamily b, polypeptide 1	protein-coding
chr13-132	chr13	56193792	56193992	+	9.9	0.82	Intergenic	RLTR13B2|LTR|ERVK	-15007	NM_001168615	212937	Mm.116697	NM_145976	ENSMUSG00000049625	Tifab	-	TRAF-interacting protein with forkhead-associated domain, family member B	protein-coding
chr8-163	chr8	111393981	111394181	+	9.9	0.82	promoter-TSS (NM_178086)	promoter-TSS (NM_178086)	-260	NM_178086	338521	Mm.41083	NM_178086	ENSMUSG00000033579	Fa2h	FAAH|Faxdc1|G630055L08Rik	fatty acid 2-hydroxylase	protein-coding
chr13-154	chr13	24631389	24631589	+	9.9	0.696	intron (NM_178658, intron 1 of 13)	intron (NM_178658, intron 1 of 13)	-7159	NM_001080381	193385	Mm.217319	NM_029679	ENSMUSG00000036006	Fam65b	-	family with sequence similarity 65, member B	protein-coding
chr9-137	chr9	122100216	122100416	+	9.9	0.602	Intergenic	(CAGG)n|Simple_repeat|Simple_repeat	-16950	NM_001164572	20623	Mm.257989	NM_133741	ENSMUSG00000038145	Snrk	2010012F07Rik|AI448042|AW547029|E030034B15|R74830|mKIAA0096	SNF related kinase	protein-coding
chr2-258	chr2	103604983	103605183	+	9.9	0.932	intron (NM_178890, intron 1 of 16)	Arthur1B|DNA|hAT-Tip100	38773	NM_178890	99382	Mm.35850	NM_178890	ENSMUSG00000032724	Abtb2	AW539457|BPOZ-2	ankyrin repeat and BTB (POZ) domain containing 2	protein-coding
chr8-182	chr8	115530139	115530339	+	9.9	0.782	Intergenic	Intergenic	176655	NM_001025577	17132	Mm.275549	NM_001025577	ENSMUSG00000055435	Maf	2810401A20Rik|A230108G15Rik|AW047063|c-maf	avian musculoaponeurotic fibrosarcoma oncogene homolog	protein-coding
chr9-215	chr9	22078670	22078870	+	9.9	0.913	intron (NM_001253898, intron 1 of 7)	B2_Mm1a|SINE|B2	6657	NM_001253897	26940	Mm.425568	NM_012029	ENSMUSG00000066839	Ecsit	Sitpec	ECSIT signalling integrator	protein-coding
chr12-443	chr12	80434214	80434414	+	9.9	0.841	intron (NM_177267, intron 1 of 8)	intron (NM_177267, intron 1 of 8)	2287	NM_177267	320808	Mm.220310	NM_177267	ENSMUSG00000049106	Dcaf5	9430020B07Rik|AI325023|AI430035|AI848110|AW124614|BCRG2|BCRP2|Wdr22	DDB1 and CUL4 associated factor 5	protein-coding
chr12-706	chr12	119859767	119859967	+	9.9	0.776	Intergenic	L1MEf|LINE|L1	-86095	NM_001294154	217951	Mm.387395	NM_001160385	ENSMUSG00000048004	Tmem196	Gm528	transmembrane protein 196	protein-coding
chr11-276	chr11	77785869	77786069	+	9.9	0.646	intron (NM_011586, intron 1 of 39)	intron (NM_011586, intron 1 of 39)	8734	NM_001291212	360013	Mm.341248	NM_011586	ENSMUSG00000000631	Myo18a	MAJN|MyoPDZ|MysPDZ|SP-R210	myosin XVIIIA	protein-coding
chr2-297	chr2	155203571	155203771	+	9.9	0.717	intron (NM_001243712, intron 17 of 25)	B4A|SINE|B4	-32862	NR_111891	67068	Mm.23693	NM_025947	ENSMUSG00000047459	Dynlrb1	2010012N15Rik|2010320M17Rik|9430076K19Rik|AV124457|DNLC2A|Dncl2a|km23-1	dynein light chain roadblock-type 1	protein-coding
chr10-146	chr10	116177294	116177494	+	9.9	0.816	promoter-TSS (NM_001161840)	promoter-TSS (NM_001161840)	43	NM_001161840	19279	Mm.336316	NM_011217	ENSMUSG00000020151	Ptprr	Gmcp1|PTP-SL|PTPBR7|RPTPRR|mPTP213	protein tyrosine phosphatase, receptor type, R	protein-coding
chr4-200	chr4	87809345	87809545	+	9.9	0.87	intron (NM_027326, intron 5 of 10)	intron (NM_027326, intron 5 of 10)	-3122	NM_029931	70122	Mm.288898	NM_027326	ENSMUSG00000028496	Mllt3	2210011H10Rik|2610012I03Rik|3830408D16Rik|Af9|D4Ertd321e	myeloid/lymphoid or mixed-lineage leukemia; translocated to, 3	protein-coding
chr15-219	chr15	73628885	73629085	+	9.9	0.784	Intergenic	Intergenic	-4241	NM_001033219	106068	Mm.212813	NM_001033219	ENSMUSG00000079020	Slc45a4	9330175B01Rik|AW552276	solute carrier family 45, member 4	protein-coding
chr6-203	chr6	39316076	39316276	+	9.9	0.784	Intergenic	(GA)n|Simple_repeat|Simple_repeat	61531	NM_028123	72144	Mm.482167	NM_028123	ENSMUSG00000029924	Slc37a3	2610507O21Rik|AU044904	solute carrier family 37 (glycerol-3-phosphate transporter), member 3	protein-coding
chr2-222	chr2	50676398	50676598	+	9.9	0.826	Intergenic	Intergenic	-233186	NR_033595	227885	Mm.301654	NR_033595	ENSMUSG00000083270	Gm13498	OTTMUSG00000012426	heat shock protein 90 alpha (cytosolic), class B member 1 pseudogene	pseudo
chr10-289	chr10	60862990	60863190	+	9.9	0.778	Intergenic	Intergenic	-31509	NM_029770	107449	Mm.290433	NM_029770	ENSMUSG00000020099	Unc5b	6330415E02Rik|A630020F16|D10Bwg0792e|Unc5h2	unc-5 netrin receptor B	protein-coding
chr2-170	chr2	126467746	126467946	+	9.9	0.812	intron (NM_001080944, intron 3 of 27)	intron (NM_001080944, intron 3 of 27)	23707	NM_001080944	241633	Mm.222235	NM_001080944	ENSMUSG00000060131	Atp8b4	A530043E15|Im	ATPase, class I, type 8B, member 4	protein-coding
chr5-211	chr5	15513290	15513490	+	9.9	0.755	Intergenic	L1_Mm|LINE|L1	15832	NM_001310449	100861755	Mm.382859	NM_001310449	ENSMUSG00000106445	Gm21190	-	predicted gene, 21190	protein-coding
chr4-148	chr4	147390292	147390492	+	9.9	0.7	intron (NM_001039209, intron 1 of 2)	intron (NM_001039209, intron 1 of 2)	-162885	NM_001014397	433804	Mm.332047	NM_001014397	ENSMUSG00000065999	Zfp985	Gm13154|OTTMUSG00000010673	zinc finger protein 985	protein-coding
chr11-296	chr11	21167203	21167403	+	9.9	0.884	Intergenic	ORR1C2|LTR|ERVL-MaLR	-71729	NM_139061	245944	Mm.170103	NM_139061	ENSMUSG00000020128	Vps54	Hcc8|Vps54l|mSLP8|wr	VPS54 GARP complex subunit	protein-coding
chr7-93	chr7	83484443	83484643	+	9.9	0.776	Intergenic	GA-rich|Low_complexity|Low_complexity	-100388	NM_177695	233424	Mm.486619	NM_177695	ENSMUSG00000038540	Tmc3	9030203A06	transmembrane channel-like gene family 3	protein-coding
chr8-166	chr8	3640237	3640437	+	9.9	0.907	intron (NM_011503, intron 15 of 18)	intron (NM_011503, intron 15 of 18)	9177	NM_011503	20911	Mm.7247	NM_011503	ENSMUSG00000004626	Stxbp2	C79054|Munc-18-2|Munc-18b|Munc18b|Sxtbp2|Sxtp2|Unc18-2|Unc18b|muSec1	syntaxin binding protein 2	protein-coding
chr2-259	chr2	103667657	103667857	+	9.9	0.702	intron (NM_178890, intron 1 of 16)	ORR1D2|LTR|ERVL-MaLR	93493	NM_153126	98956	Mm.288005	NM_153126	ENSMUSG00000027185	Nat10	AI429152	N-acetyltransferase 10	protein-coding
chr16-117	chr16	5014596	5014796	+	9.9	0.804	3' UTR (NM_028720, exon 16 of 16)	3' UTR (NM_028720, exon 16 of 16)	-1143	NM_133185	66049	Mm.27792	NM_133185	ENSMUSG00000022540	Rogdi	0610011C19Rik|AU020118|C76152|Lzf	rogdi homolog	protein-coding
chr7-184	chr7	121981558	121981758	+	9.9	0.656	promoter-TSS (NM_001033318)	promoter-TSS (NM_001033318)	35	NM_001033318	233824	Mm.442015	NM_001033318	ENSMUSG00000034951	Cog7	5630400E24Rik|Gm167	component of oligomeric golgi complex 7	protein-coding
chr3-149	chr3	78968673	78968873	+	9.9	0.884	Intergenic	L1Md_F2|LINE|L1	176114	NM_001310536	76089	Mm.31220	NM_001099624	ENSMUSG00000062232	Rapgef2	5830453M24Rik|CNRasGEF|Pdzgef1|RA-GEF-1|mKIAA0313|nRapGEP	Rap guanine nucleotide exchange factor (GEF) 2	protein-coding
chr13-90	chr13	112366434	112366634	+	9.9	0.702	intron (NM_001168403, intron 9 of 11)	Arthur1C|DNA|hAT-Tip100	78016	NM_001168404	77318	Mm.159895	NM_029898	ENSMUSG00000049985	Ankrd55	C030011J08Rik	ankyrin repeat domain 55	protein-coding
chr5-205	chr5	135956725	135956925	+	9.9	0.812	Intergenic	ID|SINE|ID	17651	NM_001160366	109267	Mm.332750	NM_001160366	ENSMUSG00000029699	Ssc4d	C330016E03Rik|S4D-SRCRB|SRCRB-S4D|Srcrb4d	scavenger receptor cysteine rich family, 4 domains	protein-coding
chr11-233	chr11	87758362	87758562	+	9.9	0.741	Intergenic	Intergenic	-1507	NR_106176	102466883		NR_106176	ENSMUSG00000065420	Mir142b	Gm27750|mmu-mir-142b	microRNA 142b	ncRNA
chr19-328	chr19	25008943	25009143	+	9.9	0.84	intron (NM_028785, intron 1 of 47)	B4A|SINE|B4	9514	NM_028785	76088	Mm.102485	NM_028785	ENSMUSG00000052085	Dock8	1200017A24Rik|5830472H07Rik|A130095G14Rik|AI461977	dedicator of cytokinesis 8	protein-coding
chr12-705	chr12	119312352	119312552	+	9.9	0.776	Intergenic	Intergenic	-74176	NM_177290	320910	Mm.217000	NM_177290	ENSMUSG00000025321	Itgb8	4832412O06Rik	integrin beta 8	protein-coding
chr18-175	chr18	64888304	64888504	+	9.9	0.771	intron (NM_001114386, intron 1 of 30)	CpG	648	NM_001114386	83814	Mm.98668	NM_031881	ENSMUSG00000024589	Nedd4l	1300012C07Rik|Nedd4-2|Nedd4b	neural precursor cell expressed, developmentally down-regulated gene 4-like	protein-coding
chr2-183	chr2	153984122	153984322	+	9.64	0.638	intron (NM_001080811, intron 2 of 10)	intron (NM_001080811, intron 2 of 10)	9277	NM_001080811	545477	Mm.379973	NM_001080811	ENSMUSG00000078998	Bpifa6	EG545477|Gm5840|Splunc6	BPI fold containing family A, member 6	protein-coding
chr6-230	chr6	114799924	114800124	+	9.64	0.735	intron (NM_028835, intron 18 of 18)	intron (NM_028835, intron 18 of 18)	121728	NM_177683	232334	Mm.268357	NM_177683	ENSMUSG00000030315	Vgll4	BC048841|VGL-4	vestigial like family member 4	protein-coding
chr4-158	chr4	89458912	89459112	+	9.64	0.764	intron (NR_132431, intron 7 of 9)	AT_rich|Low_complexity|Low_complexity	-147980	NM_007670	12579	Mm.423094	NM_007670	ENSMUSG00000073802	Cdkn2b	AV083695|INK4b|MTS2|p15|p15(INK4b)|p15INK4b	cyclin-dependent kinase inhibitor 2B (p15, inhibits CDK4)	protein-coding
chr7-127	chr7	25996124	25996324	+	9.64	0.771	Intergenic	MMVL30-int|LTR|ERV1	-65271	NM_007813	13089	Mm.482696	NM_007813	ENSMUSG00000040583	Cyp2b13	-	cytochrome P450, family 2, subfamily b, polypeptide 13	protein-coding
chr1-182	chr1	86547348	86547548	+	9.64	0.776	intron (NM_008801, intron 2 of 4)	intron (NM_008801, intron 2 of 4)	20712	NM_008972	19231	Mm.19187	NM_008972	ENSMUSG00000026238	Ptma	Thym	prothymosin alpha	protein-coding
chr6-380	chr6	38854605	38854805	+	9.64	0.826	intron (NM_010433, intron 1 of 14)	intron (NM_010433, intron 1 of 14)	-17394	NM_001136065	15258	Mm.23790	NM_010433	ENSMUSG00000061436	Hipk2	1110014O20Rik|B230339E18Rik|Stank	homeodomain interacting protein kinase 2	protein-coding
chr14-120	chr14	10139356	10139556	+	9.64	0.741	intron (NM_001308286, intron 2 of 6)	intron (NM_001308286, intron 2 of 6)	255361	NR_030680	100042415	Mm.235938	NR_030680		Mnd1-ps	Gm3833	Mnd1 retrotransposed pseudogene	pseudo
chr19-122	chr19	53277095	53277295	+	9.64	0.75	Intergenic	Intergenic	-21990	NR_036590	69319	Mm.57452	NR_036590		1700001K23Rik	-	RIKEN cDNA 1700001K23 gene	ncRNA
chr12-1258	chr12	75511514	75511714	+	9.64	0.679	intron (NM_012024, intron 3 of 13)	intron (NM_012024, intron 3 of 13)	84586	NM_012024	26932	Mm.259626	NM_012024	ENSMUSG00000021051	Ppp2r5e	4633401M22Rik|AI449017|B56beta	protein phosphatase 2, regulatory subunit B', epsilon	protein-coding
chr1-335	chr1	186855548	186855748	+	9.64	0.851	Intergenic	RLTR8|LTR|ERVK	-106290	NM_026041	67223	Mm.289841	NM_026041	ENSMUSG00000001305	Rrp15	2810430M08Rik|5430437H21Rik	ribosomal RNA processing 15 homolog (S. cerevisiae)	protein-coding
chr13-149	chr13	112000867	112001067	+	9.64	0.709	Intergenic	Intergenic	133031	NR_130345	102636620	Mm.402328	NR_130345	ENSMUSG00000086111	Gm15326	OTTMUSG00000020187	predicted gene 15326	ncRNA
chr6-189	chr6	136926381	136926581	+	9.64	0.721	intron (NM_001301308, intron 4 of 4)	intron (NM_001301308, intron 4 of 4)	-4301	NM_026983	69187	Mm.33692	NM_026983	ENSMUSG00000030219	Erp27	1810033M07Rik|1810047B09Rik	endoplasmic reticulum protein 27	protein-coding
chr4-225	chr4	8784420	8784620	+	9.64	0.787	intron (NM_001277149, intron 2 of 37)	intron (NM_001277149, intron 2 of 37)	94114	NM_001277149	320790	Mm.138792	NM_001033395	ENSMUSG00000041235	Chd7	A730019I05Rik|Cycn|Cyn|Dz|Edy|Flo|GENA 47|GENA 60|Gena 52|Lda|Mt|Obt|Todo|WBE1|Whi|metis	chromodomain helicase DNA binding protein 7	protein-coding
chr5-90	chr5	4825104	4825304	+	9.64	0.824	intron (NM_001310448, intron 13 of 13)	intron (NM_001310448, intron 13 of 13)	-66988	NM_021457	14362	Mm.246003	NM_021457	ENSMUSG00000044674	Fzd1	AW227548|FZ-1|Fz1	frizzled class receptor 1	protein-coding
chr8-652	chr8	73124622	73124822	+	9.64	0.822	intron (NM_010687, intron 3 of 14)	intron (NM_010687, intron 3 of 14)	108210	NR_039551	100628574		NR_039551	ENSMUSG00000093140	Mir28b	mmu-mir-28b	microRNA 28b	ncRNA
chr15-85	chr15	103502018	103502218	+	9.64	0.772	promoter-TSS (NM_008800)	promoter-TSS (NM_008800)	-916	NM_008800	18574	Mm.390792	NM_008800	ENSMUSG00000022489	Pde1b	Pde1b1	phosphodiesterase 1B, Ca2+-calmodulin dependent	protein-coding
chr10-201	chr10	51453990	51454190	+	9.64	0.78	Intergenic	Intergenic	-26522	NM_008147	14727	Mm.439661	NM_008147	ENSMUSG00000062593	Lilr4b	Gp49a|gp49	leukocyte immunoglobulin-like receptor, subfamily B, member 4B	protein-coding
chr9-156	chr9	52356781	52356981	+	9.64	0.771	Intergenic	Intergenic	-188770	NM_001162921	244871	Mm.295686	NM_001162921	ENSMUSG00000035164	Zc3h12c	A230108E06|C230027N18Rik|mKIAA1726	zinc finger CCCH type containing 12C	protein-coding
chrUn_GL456239-2	chrUn_GL456239	25133	25333	+	9.64	0.686	NA	Intergenic	NA	NA
chr19-213	chr19	47508483	47508683	+	9.64	0.8	intron (NM_175360, intron 8 of 9)	G-rich|Low_complexity|Low_complexity	-4399	NR_045322	100503104	Mm.442735	NR_045322	ENSMUSG00000097990	Gm19557	-	predicted gene, 19557	ncRNA
chr12-326	chr12	75508351	75508551	+	9.64	0.741	intron (NM_012024, intron 3 of 13)	intron (NM_012024, intron 3 of 13)	87749	NM_012024	26932	Mm.259626	NM_012024	ENSMUSG00000021051	Ppp2r5e	4633401M22Rik|AI449017|B56beta	protein phosphatase 2, regulatory subunit B', epsilon	protein-coding
chr19-195	chr19	6241834	6242034	+	9.64	0.884	exon (NM_194348, exon 1 of 40)	exon (NM_194348, exon 1 of 40)	266	NM_194348	329015	Mm.277384	NM_194348	ENSMUSG00000024773	Atg2a	1810013C15Rik|A830054M12|BC023754|mKIAA0404	autophagy related 2A	protein-coding
chr14-200	chr14	114691559	114691759	+	9.64	0.833	Intergenic	Intergenic	-140306	NR_045661	75822	Mm.410813	NR_045661		4930524C18Rik	-	RIKEN cDNA 4930524C18 gene	ncRNA
chr1-205	chr1	165765300	165765500	+	9.64	0.678	intron (NM_011804, intron 1 of 3)	intron (NM_011804, intron 1 of 3)	1620	NM_011804	433375	Mm.294885	NM_011804	ENSMUSG00000040713	Creg1	AA755314|Creg	cellular repressor of E1A-stimulated genes 1	protein-coding
chrX-15	chrX	59748918	59749118	+	9.64	0.69	Intergenic	RMER1B|Other|Other	-163446	NM_001290414	14168	Mm.7995	NM_010200	ENSMUSG00000031137	Fgf13	Fhf2	fibroblast growth factor 13	protein-coding
chr3-169	chr3	51422120	51422320	+	9.64	0.8	intron (NM_053089, intron 1 of 19)	intron (NM_053089, intron 1 of 19)	6204	NM_053089	74838	Mm.275281	NM_053089	ENSMUSG00000063273	Naa15	5730450D16Rik|6330400I15|ASTBDN|Narg1|Tbdn-1|mNAT1	N(alpha)-acetyltransferase 15, NatA auxiliary subunit	protein-coding
chr2-124	chr2	89160285	89160485	+	9.64	0.594	Intergenic	Intergenic	-9049	NM_146892	258894	Mm.330379	NM_146892	ENSMUSG00000075100	Olfr1223	MOR233-10	olfactory receptor 1223	protein-coding
chr12-1200	chr12	39632671	39632871	+	9.64	0.905	Intergenic	Intergenic	404605	NM_007487	11861	Mm.12723	NM_007487	ENSMUSG00000047446	Arl4a	AI467555|Arl4	ADP-ribosylation factor-like 4A	protein-coding
chr7-159	chr7	92976077	92976277	+	9.64	0.741	Intergenic	Lx5c|LINE|L1	100924	NM_028243	72461	Mm.389969	NM_028243	ENSMUSG00000061119	Prcp	2510048K03Rik|2610104A14Rik|AI451719|HUMPCP|PCP	prolylcarboxypeptidase (angiotensinase C)	protein-coding
chr6-337	chr6	133973393	133973593	+	9.64	0.745	Intergenic	Intergenic	-62207	NM_001303102	14011	Mm.269995	NM_007961	ENSMUSG00000030199	Etv6	AW123102|AW557856|Tel	ets variant 6	protein-coding
chr2-325	chr2	127917093	127917293	+	9.64	0.638	intron (NM_028765, intron 9 of 17)	intron (NM_028765, intron 9 of 17)	62565	NM_028765	74121	Mm.244835	NM_028765	ENSMUSG00000027380	Acoxl	1200014P05Rik|AV025673	acyl-Coenzyme A oxidase-like	protein-coding
chr8-767	chr8	71700846	71701046	+	9.64	0.712	intron (NM_028189, intron 1 of 2)	intron (NM_028189, intron 1 of 2)	854	NM_028189	72297	Mm.290837	NM_028189	ENSMUSG00000031803	B3gnt3	2210008L19Rik	UDP-GlcNAc:betaGal beta-1,3-N-acetylglucosaminyltransferase 3	protein-coding
chr4-342	chr4	32164183	32164383	+	9.64	0.74	Intergenic	ORR1E|LTR|ERVL-MaLR	200176	NM_172688	26409	Mm.258589	NM_009316	ENSMUSG00000028284	Map3k7	B430101B05|C87327|Tak1	mitogen-activated protein kinase kinase kinase 7	protein-coding
chr12-375	chr12	113295343	113295543	+	9.64	0.591	Intergenic	Intergenic	109540	NM_153776	69195	Mm.313244	NM_153776	ENSMUSG00000049036	Tmem121	2410008J05Rik|Hole	transmembrane protein 121	protein-coding
chr16-145	chr16	11655251	11655451	+	9.64	0.652	intron (NM_001290148, intron 9 of 13)	intron (NM_001290148, intron 9 of 13)	-124351	NR_126430	73761	Mm.39183	NR_126430		4833415N18Rik	-	RIKEN cDNA 4833415N18 gene	ncRNA
chr15-309	chr15	38069073	38069273	+	9.64	0.78	intron (NM_001081359, intron 1 of 58)	intron (NM_001081359, intron 1 of 58)	9681	NM_001112721	70790	Mm.476840	NM_027553	ENSMUSG00000037487	Ubr5	Edd|Edd1	ubiquitin protein ligase E3 component n-recognin 5	protein-coding
chr11-340	chr11	58011479	58011679	+	9.64	0.884	intron (NM_028451, intron 1 of 18)	intron (NM_028451, intron 1 of 18)	2515	NM_028451	73158	Mm.248843	NM_028451	ENSMUSG00000037331	Larp1	1810024J12Rik|3110040D16Rik|Larp|mKIAA0731	La ribonucleoprotein domain family, member 1	protein-coding
chr17-249	chr17	26661692	26661892	+	9.64	0.738	Intergenic	RMER10A|LTR|ERVL	-14604	NM_025272	11974	Mm.22602	NM_025272	ENSMUSG00000015575	Atp6v0e	Atp6k|Atp6v0e1|M9.2	ATPase, H+ transporting, lysosomal V0 subunit E	protein-coding
chr4-156	chr4	83315244	83315444	+	9.64	0.676	intron (NM_027238, intron 1 of 19)	intron (NM_027238, intron 1 of 19)	8845	NM_027238	69863	Mm.5540	NM_025782	ENSMUSG00000038172	Ttc39b	1810054D07Rik|9130422G05Rik|AI450603|AV103077|AW215585	tetratricopeptide repeat domain 39B	protein-coding
chr1-398	chr1	105780111	105780311	+	9.64	0.736	promoter-TSS (NM_009399)	promoter-TSS (NM_009399)	-512	NM_009399	21934	Mm.6251	NM_009399	ENSMUSG00000026321	Tnfrsf11a	Ly109|ODFR|OFE|Rank|TRANCE-R|mRANK	tumor necrosis factor receptor superfamily, member 11a, NFKB activator	protein-coding
chr3-168	chr3	30860602	30860802	+	9.64	0.672	intron (NM_001286994, intron 1 of 3)	intron (NM_001286994, intron 1 of 3)	4752	NM_001286994	71862	Mm.272019	NM_027965	ENSMUSG00000037661	Gpr160	1700025D19Rik|GPCR150	G protein-coupled receptor 160	protein-coding
chr15-142	chr15	74988778	74988978	+	9.64	0.609	Intergenic	Intergenic	-5448	NM_020498	57248	Mm.358339	NM_020498	ENSMUSG00000022586	Ly6i	AI789751|Ly-6I|Ly-6M	lymphocyte antigen 6 complex, locus I	protein-coding
chr6-408	chr6	119872056	119872256	+	9.64	0.826	Intergenic	L1_Mur3|LINE|L1	23963	NR_030776	67289	Mm.418299	NR_030776		3110021A11Rik	-	RIKEN cDNA 3110021A11 gene	ncRNA
chr3-260	chr3	105877996	105878196	+	9.64	0.74	intron (NM_027025, intron 1 of 6)	intron (NM_027025, intron 1 of 6)	7238	NM_001174169	69296	Mm.235024	NM_027025	ENSMUSG00000000562	Tmigd3	1700001d09rik|4930578J19Rik	transmembrane and immunoglobulin domain containing 3	protein-coding
chr16-176	chr16	93445852	93446052	+	9.64	0.75	intron (NR_040494, intron 1 of 2)	intron (NR_040494, intron 1 of 2)	12920	NR_040494	72264	Mm.396204	NR_040494	ENSMUSG00000099968	1700029J03Rik	-	RIKEN cDNA 1700029J03 gene	ncRNA
chr9-174	chr9	48418036	48418236	+	9.64	0.725	Intergenic	Intergenic	-36208	NR_026561	667933	Mm.491076	NR_026561		Gm8884	EG667933	predicted gene 8884	ncRNA
chr5-282	chr5	117319521	117319721	+	9.64	0.804	intron (NM_001033311, intron 1 of 9)	CpG	355	NM_001033311	231668	Mm.298603	NM_001033311	ENSMUSG00000066894	Vsig10	-	V-set and immunoglobulin domain containing 10	protein-coding
chr8-351	chr8	128680284	128680484	+	9.64	0.844	Intergenic	Intergenic	-5270	NM_010578	16412	Mm.263396	NM_010578	ENSMUSG00000025809	Itgb1	4633401G24Rik|AA409975|AA960159|CD29|ENSMUSG00000051907|Fnrb|Gm9863|gpIIa	integrin beta 1 (fibronectin receptor beta)	protein-coding
chr18-157	chr18	86867443	86867643	+	9.64	0.717	Intergenic	Intergenic	155478	NM_172633	12405	Mm.70775	NM_172633	ENSMUSG00000024647	Cbln2	6330593N19Rik|A730004O05	cerebellin 2 precursor protein	protein-coding
chr15-239	chr15	38468611	38468811	+	9.64	0.837	Intergenic	Intergenic	21836	NR_105916	102465574		NR_105916	ENSMUSG00000099110	Mir6951	Gm27765|mmu-mir-6951	microRNA 6951	ncRNA
chr19-224	chr19	5970486	5970686	+	9.64	0.867	intron (NM_198650, intron 9 of 9)	intron (NM_198650, intron 9 of 9)	-6380	NM_008893	18969	Mm.209931	NM_008893	ENSMUSG00000024833	Pola2	AI573378	polymerase (DNA directed), alpha 2	protein-coding
chr7-344	chr7	145146838	145147038	+	9.64	0.81	Intergenic	Intergenic	61181	NR_033626	100040049	Mm.102235	NR_033626	ENSMUSG00000109305	1810010D01Rik	Gm2572	RIKEN cDNA 1810010D01 gene	ncRNA
chr2-238	chr2	160620755	160620955	+	9.64	0.789	Intergenic	Intergenic	-25042	NM_009408	21969	Mm.217233	NM_009408	ENSMUSG00000070544	Top1	AI467334|D130064I21Rik|Top-1	topoisomerase (DNA) I	protein-coding
chr3-109	chr3	59081027	59081227	+	9.64	0.8	intron (NM_177855, intron 10 of 43)	intron (NM_177855, intron 10 of 43)	20694	NM_173398	229323	Mm.123648	NM_173398	ENSMUSG00000050075	Gpr171	A630006E05|F730001G15Rik|H963	G protein-coupled receptor 171	protein-coding
chr11-166	chr11	69805442	69805642	+	9.64	0.786	promoter-TSS (NM_001033433)	promoter-TSS (NM_001033433)	82	NM_001033433	380705	Mm.490673	NM_001033433	ENSMUSG00000089876	Tmem102	4632403M07Rik|Cbap|Tmem102-ps	transmembrane protein 102	protein-coding
chr13-144	chr13	55373922	55374122	+	9.64	0.721	intron (NM_016758, intron 1 of 14)	intron (NM_016758, intron 1 of 14)	4290	NM_016758	51791	Mm.1426	NM_016758	ENSMUSG00000052087	Rgs14	RPIP1	regulator of G-protein signaling 14	protein-coding
chr11-374	chr11	46811778	46811978	+	9.64	0.809	intron (NM_178759, intron 1 of 8)	intron (NM_178759, intron 1 of 8)	1079	NM_178759	276891	Mm.69002	NM_178759	ENSMUSG00000055546	Timd4	B430010N18Rik|TIM-4|Tim4	T cell immunoglobulin and mucin domain containing 4	protein-coding
chr11-457	chr11	3382624	3382824	+	9.64	0.75	intron (NM_010718, intron 2 of 15)	intron (NM_010718, intron 2 of 15)	-11332	NM_173053	16886	Mm.124176	NM_010718	ENSMUSG00000020451	Limk2	Limk-2|whe	LIM motif-containing protein kinase 2	protein-coding
chr10-208	chr10	80623283	80623483	+	9.64	0.737	intron (NM_134002, intron 1 of 10)	intron (NM_134002, intron 1 of 10)	603	NM_134002	103236	Mm.29873	NM_134002	ENSMUSG00000003345	Csnk1g2	2810429I12Rik|AI463719	casein kinase 1, gamma 2	protein-coding
chr2-255	chr2	71338703	71338903	+	9.64	0.709	intron (NM_172436, intron 3 of 17)	intron (NM_172436, intron 3 of 17)	28751	NM_172436	78830	Mm.30928	NM_172436	ENSMUSG00000027010	Slc25a12	2610002D09Rik|AI839531|B230107K20Rik|BB129864	solute carrier family 25 (mitochondrial carrier, Aralar), member 12	protein-coding
chr18-139	chr18	67347911	67348111	+	9.64	0.567	intron (NM_007702, intron 1 of 4)	MER2|DNA|TcMar-Tigger	-3908	NR_033214	338360	Mm.441590	NR_033214	ENSMUSG00000046415	B430212C06Rik	-	RIKEN cDNA B430212C06 gene	ncRNA
chr19-96	chr19	46606888	46607088	+	9.64	0.695	intron (NM_001177812, intron 2 of 4)	intron (NM_001177812, intron 2 of 4)	7882	NM_146099	226178	Mm.329895	NM_146099	ENSMUSG00000047731	Wbp1l	D19Wsu162e|Opal1	WW domain binding protein 1 like	protein-coding
chr6-317	chr6	88634159	88634359	+	9.64	0.712	Intergenic	Intergenic	-6811	NM_001278671	74589	Mm.196226	NM_029013	ENSMUSG00000033182	Kbtbd12	4833415F11Rik|4933428M03Rik|Klhdc6	kelch repeat and BTB (POZ) domain containing 12	protein-coding
chr7-169	chr7	7188344	7188544	+	9.64	0.824	Intergenic	Intergenic	17091	NM_146179	232854	Mm.184857	NM_146179	ENSMUSG00000034538	Zfp418	A230102I05Rik	zinc finger protein 418	protein-coding
chr19-112	chr19	44360284	44360484	+	9.64	0.776	Intergenic	MTB|LTR|ERVL-MaLR	27058	NM_183216	329065	Mm.313583	NM_183216	ENSMUSG00000050195	Scd4	ACOD4	stearoyl-coenzyme A desaturase 4	protein-coding
chr1-354	chr1	107327197	107327397	+	9.64	0.655	Intergenic	L1Md_F2|LINE|L1	-35017	NM_025867	66957	Mm.12638	NM_025867	ENSMUSG00000026327	Serpinb11	2310046M08Rik|AU015399	serine (or cysteine) peptidase inhibitor, clade B (ovalbumin), member 11	protein-coding
chr18-113	chr18	36533957	36534157	+	9.64	0.889	intron (NM_001271547, intron 14 of 19)	intron (NM_001271547, intron 14 of 19)	5905	NM_001271544	240215	Mm.135463	NM_172830	ENSMUSG00000024485	Slc4a9	AE4|D630003B07|D630024F24Rik	solute carrier family 4, sodium bicarbonate cotransporter, member 9	protein-coding
chr9-143	chr9	61348027	61348227	+	9.64	0.7	Intergenic	Intergenic	-24239	NM_001083928	21887	Mm.24255	NM_009389	ENSMUSG00000032280	Tle3	2610103N05Rik|ESG|Grg3a|Grg3b|mKIAA1547	transducin-like enhancer of split 3	protein-coding
chr2-216	chr2	26603565	26603765	+	9.64	0.76	intron (NM_026212, intron 1 of 5)	intron (NM_026212, intron 1 of 5)	752	NM_026212	67512	Mm.24244	NM_026212	ENSMUSG00000026922	Agpat2	2510002J07Rik|AV000834|BSCL|BSCL1|LPAAB|LPAAT-beta	1-acylglycerol-3-phosphate O-acyltransferase 2 (lysophosphatidic acid acyltransferase, beta)	protein-coding
chr6-283	chr6	108532480	108532680	+	9.64	0.648	intron (NM_010585, intron 60 of 61)	intron (NM_010585, intron 60 of 61)	42837	NR_106121	102465766		NR_106121	ENSMUSG00000105697	Mir7661	mmu-mir-7661	microRNA 7661	ncRNA
chr2-434	chr2	122683082	122683282	+	9.64	0.925	3' UTR (NM_011774, exon 7 of 7)	3' UTR (NM_011774, exon 7 of 7)	19481	NM_011774	22785	Mm.27801	NM_011774	ENSMUSG00000005802	Slc30a4	Znt4|lm|znT-4	solute carrier family 30 (zinc transporter), member 4	protein-coding
chr4-174	chr4	11147202	11147402	+	9.64	0.792	Intergenic	Intergenic	-9139	NM_001199105	60599	Mm.393018	NM_021897	ENSMUSG00000028211	Trp53inp1	2700057G22Rik|SIP|SIP18|SIP27|Stinp|Teap	transformation related protein 53 inducible nuclear protein 1	protein-coding
chr14-204	chr14	20766034	20766234	+	9.64	0.766	intron (NM_178597, intron 6 of 20)	intron (NM_178597, intron 6 of 20)	27954	NM_001039138	12325	Mm.235182	NM_178597	ENSMUSG00000021820	Camk2g	Camkg	calcium/calmodulin-dependent protein kinase II gamma	protein-coding
chr18-75	chr18	20792460	20792660	+	9.64	0.736	Intergenic	L1_Mur3|LINE|L1	-46156	NM_019737	56386	Mm.393827	NM_019737	ENSMUSG00000056124	B4galt6	AA536803|AU022389	UDP-Gal:betaGlcNAc beta 1,4-galactosyltransferase, polypeptide 6	protein-coding
chr4-392	chr4	147123369	147123569	+	9.64	0.655	Intergenic	L1_Mur2|LINE|L1	-52397	NM_001039209	195531	Mm.270762	NM_001039209	ENSMUSG00000078496	Zfp982	Gm13152|OTTMUSG00000010671	zinc finger protein 982	protein-coding
chr13-260	chr13	75885617	75885817	+	9.64	0.707	intron (NM_028493, intron 8 of 11)	L1_Mus1|LINE|L1	45831	NM_053108	93692	Mm.25844	NM_053108	ENSMUSG00000021591	Glrx	C86710|D13Wsu156e|Glrx1|Grx1|TTase	glutaredoxin	protein-coding
chr1-247	chr1	43442550	43442750	+	9.64	0.844	Intergenic	Intergenic	-3101	NM_010879	17974	Mm.389903	NM_010879	ENSMUSG00000066877	Nck2	4833426I10Rik|Grb4|NCKbeta|Nck-2	non-catalytic region of tyrosine kinase adaptor protein 2	protein-coding
chr14-132	chr14	50864926	50865126	+	9.64	0.702	intron (NM_009351, intron 4 of 54)	MTB|LTR|ERVL-MaLR	5528	NM_009351	21745	Mm.318736	NM_009351	ENSMUSG00000006281	Tep1	Tp1	telomerase associated protein 1	protein-coding
chr6-254	chr6	121183478	121183678	+	9.64	0.696	promoter-TSS (NM_028730)	promoter-TSS (NM_028730)	-89	NM_001304774	74043	Mm.491240	NM_028730	ENSMUSG00000067825	Pex26	4632428M11Rik	peroxisomal biogenesis factor 26	protein-coding
chr4-115	chr4	141859715	141859915	+	9.64	0.867	exon (NM_025994, exon 4 of 4)	exon (NM_025994, exon 4 of 4)	-13456	NM_001033875	76701	Mm.489680	NM_001033875	ENSMUSG00000062478	Ctrc	1810044E12Rik	chymotrypsin C (caldecrin)	protein-coding
chr11-367	chr11	26212942	26213142	+	9.64	0.772	Intergenic	L1_Mus3|LINE|L1	-2466	NR_027973	70626	Mm.379180	NM_027486		5730522E02Rik	-	RIKEN cDNA 5730522E02 gene	ncRNA
chr4-403	chr4	8978968	8979168	+	9.64	0.698	Intergenic	L1M4|LINE|L1	288662	NM_001277149	320790	Mm.138792	NM_001033395	ENSMUSG00000041235	Chd7	A730019I05Rik|Cycn|Cyn|Dz|Edy|Flo|GENA 47|GENA 60|Gena 52|Lda|Mt|Obt|Todo|WBE1|Whi|metis	chromodomain helicase DNA binding protein 7	protein-coding
chr9-524	chr9	77916831	77917031	+	9.38	0.864	promoter-TSS (NM_134255)	promoter-TSS (NM_134255)	-434	NM_134255	68801	Mm.430736	NM_134255	ENSMUSG00000032349	Elovl5	1110059L23Rik|AI747313|AU043003|HELO1	ELOVL family member 5, elongation of long chain fatty acids (yeast)	protein-coding
chr14-113	chr14	7819613	7819813	+	9.38	0.776	intron (NM_134080, intron 1 of 45)	intron (NM_134080, intron 1 of 45)	1756	NM_134080	286940	Mm.489652	NM_134080	ENSMUSG00000025278	Flnb	AL024016|Fln-b	filamin, beta	protein-coding
chr7-202	chr7	97843569	97843769	+	9.38	0.841	intron (NM_011035, intron 1 of 14)	intron (NM_011035, intron 1 of 14)	730	NM_011035	18479	Mm.260227	NM_011035	ENSMUSG00000030774	Pak1	AW045634|PAK-1|Paka	p21 protein (Cdc42/Rac)-activated kinase 1	protein-coding
chr8-222	chr8	28527432	28527632	+	9.38	0.783	Intergenic	L1M5|LINE|L1	-442679	NR_033590	666422	Mm.484413	NR_033590	ENSMUSG00000110372	Gm8096	EG666422	3-phosphoglycerate dehydrogenase pseudogene	pseudo
chr8-754	chr8	60152295	60152495	+	9.38	0.923	Intergenic	L1_Mus3|LINE|L1	326746	NR_126087	75017	Mm.60775	NR_126087	ENSMUSG00000110406	4930470O06Rik	-	RIKEN cDNA 4930470O06 gene	ncRNA
chr11-557	chr11	77868678	77868878	+	9.38	0.733	Intergenic	Intergenic	25094	NM_008952	19193	Mm.8543	NM_008952	ENSMUSG00000017453	Pipox	LPIPOX|Pso	pipecolic acid oxidase	protein-coding
chr4-331	chr4	145246959	145247159	+	9.38	0.735	promoter-TSS (NM_011610)	promoter-TSS (NM_011610)	-189	NM_011610	21938	Mm.235328	NM_011610	ENSMUSG00000028599	Tnfrsf1b	CD120b|TNF-R-II|TNF-R2|TNF-R75|TNF-alphaR2|TNFBR|TNFR80|TNFRII|TNFalpha-R2|Tnfr-1|Tnfr2|p75	tumor necrosis factor receptor superfamily, member 1b	protein-coding
chr10-431	chr10	41385165	41385365	+	9.38	0.86	Intergenic	L1MEc|LINE|L1	-65093	NM_001277229	268294	Mm.258475	NM_153398	ENSMUSG00000019826	Zbtb24	BC055367|Bif1|Bsg1|ZNF450	zinc finger and BTB domain containing 24	protein-coding
chr6-182	chr6	97214185	97214385	+	9.38	0.755	intron (NM_022992, intron 1 of 2)	CT-rich|Low_complexity|Low_complexity	3493	NM_022992	65106	Mm.291014	NM_022992	ENSMUSG00000035199	Arl6ip5	5930404D22Rik|AV001879|Aip-5|Gtrap3-18|addiscin	ADP-ribosylation factor-like 6 interacting protein 5	protein-coding
chr19-152	chr19	21646482	21646682	+	9.38	0.764	intron (NM_025423, intron 1 of 3)	intron (NM_025423, intron 1 of 3)	6209	NM_025423	66206	Mm.272430	NM_025423	ENSMUSG00000035171	1110059E24Rik	-	RIKEN cDNA 1110059E24 gene	protein-coding
chr3-432	chr3	148312491	148312691	+	9.38	0.818	Intergenic	Intergenic	642044	NM_001081298	99633	Mm.9776	NM_001081298	ENSMUSG00000028184	Adgrl2	AI450192|CIRL-2|Gm619|Lec1|Lphh1|Lphn2|mKIAA0786	adhesion G protein-coupled receptor L2	protein-coding
chr2-292	chr2	122147213	122147413	+	9.38	0.649	promoter-TSS (NM_009735)	promoter-TSS (NM_009735)	-374	NM_009735	12010	Mm.163	NM_009735	ENSMUSG00000060802	B2m	Ly-m11|beta2-m|beta2m	beta-2 microglobulin	protein-coding
chr1-493	chr1	33878024	33878224	+	9.38	0.661	intron (NM_001310484, intron 2 of 5)	intron (NM_001310484, intron 2 of 5)	29497	NM_177235	320705	Mm.336619	NM_177235	ENSMUSG00000042182	Bend6	B230209C24Rik	BEN domain containing 6	protein-coding
chr2-682	chr2	83747603	83747803	+	9.38	0.857	intron (NM_008402, intron 2 of 29)	B1_Mur2|SINE|Alu	23306	NM_008402	16410	Mm.227	NM_008402	ENSMUSG00000027087	Itgav	1110004F14Rik|2610028E01Rik|CD51|D430040G12Rik	integrin alpha V	protein-coding
chr12-491	chr12	57808790	57808990	+	9.38	0.776	Intergenic	ORR1G|LTR|ERVL-MaLR	-145979	NR_131112	217601	Mm.488987	NR_131112		BC042761	-	cDNA sequence BC042761	ncRNA
chr4-313	chr4	109476789	109476989	+	9.38	0.829	promoter-TSS (NM_013876)	promoter-TSS (NM_013876)	-384	NM_013876	29864	Mm.392580	NM_013876	ENSMUSG00000028557	Rnf11	-	ring finger protein 11	protein-coding
chr12-517	chr12	98734543	98734743	+	9.38	0.535	promoter-TSS (NM_011877)	promoter-TSS (NM_011877)	2	NM_011877	24000	Mm.4420	NM_011877	ENSMUSG00000021009	Ptpn21	PTPD1|PTPRL10	protein tyrosine phosphatase, non-receptor type 21	protein-coding
chr10-278	chr10	23788356	23788556	+	9.38	0.75	Intergenic	Intergenic	-1247	NM_011295	20042	Mm.371846	NM_011295	ENSMUSG00000061983	Rps12	-	ribosomal protein S12	protein-coding
chr9-246	chr9	124257515	124257715	+	9.38	0.783	Intergenic	Intergenic	55079	NM_001243118	630836	Mm.458553	NM_001243117	ENSMUSG00000074829	2010315B03Rik	BC029716	RIKEN cDNA 2010315B03 gene	protein-coding
chr6-688	chr6	97048427	97048627	+	9.38	0.83	intron (NM_177233, intron 1 of 5)	intron (NM_177233, intron 1 of 5)	11884	NM_177233	320701	Mm.131700	NM_177233	ENSMUSG00000046500	Fam19a4	C130034I18Rik|Fam19a4 Tafa-4|Tafa-4	family with sequence similarity 19, member A4	protein-coding
chr1-752	chr1	90592876	90593076	+	9.38	0.947	Intergenic	(CAAAC)n|Simple_repeat|Simple_repeat	-10449	NM_133805	108679	Mm.119177	NM_133805	ENSMUSG00000034432	Cops8	9430009J09Rik|AA408242|Csn8|Sgn8	COP9 signalosome subunit 8	protein-coding
chr11-543	chr11	67492037	67492237	+	9.38	0.679	Intergenic	Intergenic	-40861	NM_008088	14457	Mm.40338	NM_008088	ENSMUSG00000033066	Gas7	AW124766|B230343A10Rik|Gas7-cb	growth arrest specific 7	protein-coding
chr15-117	chr15	7152895	7153095	+	9.38	0.759	intron (NM_013584, intron 1 of 19)	B3A|SINE|B2	12453	NM_013584	16880	Mm.149720	NM_013584	ENSMUSG00000054263	Lifr	A230075M04Rik|AW061234|LIF	leukemia inhibitory factor receptor	protein-coding
chr4-230	chr4	41731499	41731699	+	9.38	0.736	promoter-TSS (NM_001017362)	promoter-TSS (NM_001017362)	-457	NM_001252622	550619	Mm.425179	NM_001017362	ENSMUSG00000066224	Arid3c	OTTMUSG00000006683	AT rich interactive domain 3C (BRIGHT-like)	protein-coding
chr1-251	chr1	74255747	74255947	+	9.38	0.8	intron (NM_029711, intron 5 of 9)	intron (NM_029711, intron 5 of 9)	19297	NM_029711	76709	Mm.337038	NM_029711	ENSMUSG00000006304	Arpc2	2210023N03Rik|34kDa|p34-Arc	actin related protein 2/3 complex, subunit 2	protein-coding
chr12-1083	chr12	99406562	99406762	+	9.38	0.878	intron (NM_183186, intron 1 of 5)	intron (NM_183186, intron 1 of 5)	43412	NM_183186	71375	Mm.341972	NM_183186	ENSMUSG00000033713	Foxn3	5430426H20Rik|AA589593|AW556347|Ches1|Ches1l|HTLFL1	forkhead box N3	protein-coding
chr5-186	chr5	15482877	15483077	+	9.38	0.87	Intergenic	Lx2A1|LINE|L1	46245	NM_001310449	100861755	Mm.382859	NM_001310449	ENSMUSG00000106445	Gm21190	-	predicted gene, 21190	protein-coding
chr10-148	chr10	10517410	10517610	+	9.38	0.754	Intergenic	RLTR10D|LTR|ERVK	40697	NM_026405	67844	Mm.31486	NM_026405	ENSMUSG00000019832	Rab32	2810011A17Rik|AU022057	RAB32, member RAS oncogene family	protein-coding
chr10-193	chr10	130141747	130141947	+	9.38	0.884	Intergenic	MMVL30-int|LTR|ERV1	-14792	NM_146674	258669	Mm.377631	NM_146674	ENSMUSG00000095804	Olfr824	MOR210-3	olfactory receptor 824	protein-coding
chr7-331	chr7	100693256	100693456	+	9.38	0.69	Intergenic	Intergenic	-13346	NM_178764	319604	Mm.260362	NM_178764	ENSMUSG00000029461	Fam168a	2610030B18Rik|B930006L02Rik|mKIAA0280	family with sequence similarity 168, member A	protein-coding
chr12-466	chr12	12900612	12900812	+	9.38	0.902	Intergenic	Intergenic	41124	NM_008709	18109	Mm.16469	NM_008709	ENSMUSG00000037169	Mycn	N-myc|Nmyc|Nmyc-1|Nmyc1|bHLHe37|c-nmyc	v-myc avian myelocytomatosis viral related oncogene, neuroblastoma derived	protein-coding
chr2-246	chr2	36231461	36231661	+	9.38	0.72	intron (NM_008969, intron 2 of 10)	intron (NM_008969, intron 2 of 10)	1135	NM_008969	19224	Mm.275434	NM_008969	ENSMUSG00000047250	Ptgs1	COX1|Cox-1|Cox-3|PGHS-1|PHS 1|Pghs1	prostaglandin-endoperoxide synthase 1	protein-coding
chr3-107	chr3	6900356	6900556	+	9.38	0.902	Intergenic	L1Md_T|LINE|L1	-280013	NM_027048	69347	Mm.45822	NM_027048	ENSMUSG00000069118	1700008P02Rik	-	RIKEN cDNA 1700008P02 gene	protein-coding
chr5-261	chr5	141781188	141781388	+	9.38	0.9	intron (NM_177879, intron 4 of 44)	intron (NM_177879, intron 4 of 44)	539754	NM_177879	330222	Mm.151931	NM_177879	ENSMUSG00000039683	Sdk1	5330440E10|6720466O15Rik	sidekick cell adhesion molecule 1	protein-coding
chr18-172	chr18	56470554	56470754	+	9.38	0.85	intron (NM_026240, intron 2 of 13)	intron (NM_026240, intron 2 of 13)	38522	NM_026240	107022	Mm.24356	NM_026240	ENSMUSG00000001700	Gramd3	9030613F08Rik|9130427A09Rik|AW061306|NS3TP2	GRAM domain containing 3	protein-coding
chr10-186	chr10	96176524	96176724	+	9.38	0.8	Intergenic	ORR1A3|LTR|ERVL-MaLR	-49583	NR_110448	74881	Mm.410819	NR_110448		4930459C07Rik	-	RIKEN cDNA 4930459C07 gene	ncRNA
chr11-281	chr11	83655730	83655930	+	9.38	0.766	Intergenic	Intergenic	-6452	NM_011337	20302	Mm.1282	NM_011337	ENSMUSG00000000982	Ccl3	AI323804|G0S19-1|LD78alpha|MIP-1alpha|MIP1-(a)|MIP1-alpha|Mip1a|Scya3	chemokine (C-C motif) ligand 3	protein-coding
chr10-104	chr10	100519836	100520036	+	9.38	0.636	intron (NM_146009, intron 24 of 52)	(TG)n|Simple_repeat|Simple_repeat	31647	NM_146009	216274	Mm.229114	NM_146009	ENSMUSG00000019971	Cep290	BC004690|Nphp6|b2b1454Clo|b2b1752Clo	centrosomal protein 290	protein-coding
chr6-339	chr6	134767300	134767500	+	9.38	0.755	intron (NM_130447, intron 1 of 6)	intron (NM_130447, intron 1 of 6)	25228	NM_130447	70686	Mm.491182	NM_130447	ENSMUSG00000030203	Dusp16	3830417M17Rik|AW558566|D6Ertd213e|MKP-7|MKP7|Mkpm	dual specificity phosphatase 16	protein-coding
chr4-269	chr4	109399452	109399652	+	9.38	0.826	Intergenic	(TG)n|Simple_repeat|Simple_repeat	6705	NR_131195	102635290	Mm.427859	NR_131195		Ttc39aos1	Gm12750|OTTMUSG00000008290|lincRNA-EPS	Ttc39a opposite strand RNA 1	ncRNA
chr15-157	chr15	100598537	100598737	+	9.38	0.736	intron (NM_001304965, intron 1 of 10)	intron (NM_001304965, intron 1 of 10)	1347	NM_001304965	19009	Mm.28825	NM_010127	ENSMUSG00000009739	Pou6f1	2310038G18Rik|C79593|Emb|cns-1	POU domain, class 6, transcription factor 1	protein-coding
chr17-241	chr17	13167134	13167334	+	9.38	0.864	Intergenic	MMETn-int|LTR|ERVK	-35443	NM_199252	381058	Mm.390935	NM_199252	ENSMUSG00000067049	Unc93a	Unc93l|unc-93A	unc-93 homolog A (C. elegans)	protein-coding
chr3-203	chr3	41742929	41743129	+	9.38	0.75	promoter-TSS (NM_001081411)	promoter-TSS (NM_001081411)	411	NM_027271	73852	Mm.29006	NM_027271	ENSMUSG00000025766	D3Ertd751e	2810009O15Rik|4930415G15Rik	DNA segment, Chr 3, ERATO Doi 751, expressed	protein-coding
chr5-201	chr5	111124919	111125119	+	9.38	0.741	intron (NM_001267622, intron 5 of 22)	CT-rich|Low_complexity|Low_complexity	120875	NR_030482	735278		NR_030482	ENSMUSG00000076163	Mir701	Mirn701|mir-701|mmu-mir-701	microRNA 701	ncRNA
chr7-311	chr7	43321249	43321449	+	9.38	0.765	Intergenic	B2_Mm2|SINE|B2	-8088	NM_027264	69930	Mm.45367	NM_027264	ENSMUSG00000012640	Zfp715	2610041B18Rik|mszf15	zinc finger protein 715	protein-coding
chr2-179	chr2	59998355	59998555	+	9.38	0.65	intron (NM_001001182, intron 4 of 35)	intron (NM_001001182, intron 4 of 35)	-115849	NM_028118	72137	Mm.288734	NM_028118	ENSMUSG00000026988	Wdsub1	1700048E19Rik|2610014F08Rik	WD repeat, SAM and U-box domain containing 1	protein-coding
chr12-775	chr12	91541868	91542068	+	9.38	0.791	Intergenic	Intergenic	47681	NM_031391	83602	Mm.275728	NM_031391	ENSMUSG00000020962	Gtf2a1	6330549H03Rik|AA536742|AA959775|AW060250|TfIIAa/b|Tfiia1	general transcription factor II A, 1	protein-coding
chr2-195	chr2	57334952	57335152	+	9.38	0.655	intron (NM_010274, intron 6 of 16)	B1_Mur1|SINE|Alu	96670	NM_010274	14571	Mm.3711	NM_010274	ENSMUSG00000026827	Gpd2	AA408484|AI448216|AU021455|AW494132|GPDH|Gdm1|Gpd-m|Gpdh-m|TISP38	glycerol phosphate dehydrogenase 2, mitochondrial	protein-coding
chr6-451	chr6	91990565	91990765	+	9.38	0.679	intron (NM_172731, intron 1 of 19)	intron (NM_172731, intron 1 of 19)	3555	NM_172731	232237	Mm.295740	NM_172731	ENSMUSG00000034037	Fgd5	C330025N11Rik|ZFYVE23|mFLJ00274	FYVE, RhoGEF and PH domain containing 5	protein-coding
chr2-345	chr2	29664158	29664358	+	9.38	0.783	intron (NM_054050, intron 1 of 23)	intron (NM_054050, intron 1 of 23)	44538	NM_001039086	107746	Mm.298274	NM_054050	ENSMUSG00000039844	Rapgef1	4932418O06Rik|C3G|Grf2	Rap guanine nucleotide exchange factor (GEF) 1	protein-coding
chr3-236	chr3	109239312	109239512	+	9.38	0.792	Intergenic	Intergenic	-101271	NM_020505	57257	Mm.282257	NM_020505	ENSMUSG00000033721	Vav3	A530094I06Rik|AA986410|Idd18.1	vav 3 oncogene	protein-coding
chr7-240	chr7	19269083	19269283	+	9.38	0.867	intron (NR_104069, intron 1 of 10)	intron (NR_104069, intron 1 of 10)	2671	NM_001282021	22323	Mm.9684	NM_009499	ENSMUSG00000030403	Vasp	-	vasodilator-stimulated phosphoprotein	protein-coding
chr1-193	chr1	35890300	35890500	+	9.38	0.621	Intergenic	Intergenic	-178000	NM_015818	50785	Mm.213566	NM_015818	ENSMUSG00000045216	Hs6st1	6Ost1	heparan sulfate 6-O-sulfotransferase 1	protein-coding
chr12-675	chr12	86145411	86145611	+	9.38	0.717	intron (NM_001199843, intron 5 of 8)	RLTR13B1|LTR|ERVK	-23830	NR_046081	328136	Mm.312050	NR_046081	ENSMUSG00000097543	Gm805	-	predicted gene 805	ncRNA
chr8-172	chr8	40570506	40570706	+	9.38	0.857	intron (NM_001040699, intron 7 of 13)	MMETn-int|LTR|ERVK	-54759	NM_001271542	18983	Mm.272551	NM_011135	ENSMUSG00000031601	Cnot7	AU022737|CAF-1|Caf1|Pop2	CCR4-NOT transcription complex, subunit 7	protein-coding
chr5-279	chr5	112261207	112261407	+	9.38	0.614	intron (NM_001312895, intron 3 of 5)	B2_Mm2|SINE|B2	5487	NM_001312893	12960	Mm.29488	NM_023695	ENSMUSG00000029343	Crybb1	3110006K12Rik|BB1CRY	crystallin, beta B1	protein-coding
chr10-107	chr10	13276470	13276670	+	9.38	0.722	intron (NM_001195065, intron 2 of 12)	intron (NM_001195065, intron 2 of 12)	47590	NM_001195096	215789	Mm.283359	NM_001033257	ENSMUSG00000062866	Phactr2	AV158170|BC012871	phosphatase and actin regulator 2	protein-coding
chr4-190	chr4	155688152	155688352	+	9.38	0.736	Intergenic	RMER17A|LTR|ERVK	-6090	NM_178699	230991	Mm.29083	NM_178699	ENSMUSG00000074738	Fndc10	B930041F14Rik|MNCb-3966	fibronectin type III domain containing 10	protein-coding
chr1-259	chr1	106173890	106174090	+	9.38	0.714	intron (NM_133821, intron 1 of 16)	intron (NM_133821, intron 1 of 16)	2121	NM_133821	98432	Mm.24115	NM_133821	ENSMUSG00000044340	Phlpp1	AI836256|Phlpp|Plekhe1|SCOP|mKIAA0606	PH domain and leucine rich repeat protein phosphatase 1	protein-coding
chr13-485	chr13	111772067	111772267	+	9.38	0.868	intron (NM_011945, intron 3 of 19)	intron (NM_011945, intron 3 of 19)	36816	NM_011945	26401	Mm.15918	NM_011945	ENSMUSG00000021754	Map3k1	MAPKKK1|MEKK1|Mekk	mitogen-activated protein kinase kinase kinase 1	protein-coding
chr10-230	chr10	75781373	75781573	+	9.38	0.716	promoter-TSS (NM_133994)	promoter-TSS (NM_133994)	-59	NM_133994	103140	Mm.5731	NM_133994	ENSMUSG00000001665	Gstt3	AI118089	glutathione S-transferase, theta 3	protein-coding
chr11-312	chr11	89028041	89028241	+	9.38	0.691	Intergenic	MLT1G1|LTR|ERVL-MaLR	28738	NM_009546	217069	Mm.248445	NM_009546	ENSMUSG00000000275	Trim25	AA960166|AL022677|EFP|Zfp147	tripartite motif-containing 25	protein-coding
chr1-794	chr1	162207091	162207291	+	9.38	0.864	intron (NM_172646, intron 14 of 19)	intron (NM_172646, intron 14 of 19)	-10432	NR_002870	474332	Mm.479755	NR_002870	ENSMUSG00000078190	Dnm3os	6030416H16Rik|Hag2|Npn1|P/L01	dynamin 3, opposite strand	ncRNA
chr11-808	chr11	119928811	119929011	+	9.38	0.75	TTS (NR_039557).2	TTS (NR_039557).2	-14181	NM_001037754	108100	Mm.197534	NM_130862	ENSMUSG00000025372	Baiap2	IRSp53|R75030	brain-specific angiogenesis inhibitor 1-associated protein 2	protein-coding
chr4-339	chr4	3994084	3994284	+	9.38	0.74	Intergenic	Intergenic	25479	NM_181989	242285	Mm.98096	NM_181989	ENSMUSG00000028236	Sdr16c5	Rdhe2|Scdr9	short chain dehydrogenase/reductase family 16C, member 5	protein-coding
chr7-250	chr7	83426271	83426471	+	9.38	0.783	Intergenic	L1Md_F2|LINE|L1	-158560	NM_177695	233424	Mm.486619	NM_177695	ENSMUSG00000038540	Tmc3	9030203A06	transmembrane channel-like gene family 3	protein-coding
chr12-412	chr12	105621360	105621560	+	9.38	0.692	intron (NM_029654, intron 40 of 41)	intron (NM_029654, intron 40 of 41)	17369	NM_007539	12061	Mm.377078	NM_007539	ENSMUSG00000041347	Bdkrb1	B1BKR|B1R|BKR1|BRADYB1|Bdkrb	bradykinin receptor, beta 1	protein-coding
chr7-118	chr7	139927150	139927350	+	9.38	0.667	exon (NM_177261, exon 19 of 31)	exon (NM_177261, exon 19 of 31)	-16606	NM_009482	22286	Mm.10205	NM_009482	ENSMUSG00000047751	Utf1	AI505934	undifferentiated embryonic cell transcription factor 1	protein-coding
chr4-474	chr4	47387288	47387488	+	9.38	0.844	intron (NM_001312869, intron 1 of 7)	L1_Mus3|LINE|L1	1172	NM_001312869	21812	Mm.197552	NM_009370	ENSMUSG00000007613	Tgfbr1	ALK5|AU017191|Alk-5|ESK2|TGFR-1|TbetaR-I|TbetaRI	transforming growth factor, beta receptor I	protein-coding
chr12-498	chr12	73035806	73036006	+	9.38	0.66	Intergenic	Intergenic	10806	NM_009189	20471	Mm.4645	NM_009189	ENSMUSG00000051367	Six1	BB138287	sine oculis-related homeobox 1	protein-coding
chr10-391	chr10	81351941	81352141	+	9.38	0.822	Intergenic	Intergenic	-1584	NM_001163166	15353	Mm.38474	NM_010440	ENSMUSG00000020232	Hmg20b	AW610687|BRAF35|Hmgx2|Hmgxb2|Smarce1r	high mobility group 20B	protein-coding
chr14-143	chr14	50357060	50357260	+	9.38	0.816	promoter-TSS (NM_205819)	promoter-TSS (NM_205819)	-754	NM_205819	239081	Mm.291512	NM_205819	ENSMUSG00000051969	Tlr11	Gm287	toll-like receptor 11	protein-coding
chr5-193	chr5	32689963	32690163	+	9.38	0.75	Intergenic	Intergenic	78892	NM_009535	22612	Mm.4558	NM_009535	ENSMUSG00000014932	Yes1	Yes|p61-Yes	YES proto-oncogene 1, Src family tyrosine kinase	protein-coding
chr2-484	chr2	61651601	61651801	+	9.38	0.851	intron (NM_001164071, intron 8 of 8)	intron (NM_001164071, intron 8 of 8)	58604	NM_001164071	21353	Mm.244393	NM_011529	ENSMUSG00000064289	Tank	C86182|E430026L09Rik|I-TRAF	TRAF family member-associated Nf-kappa B activator	protein-coding
chr9-223	chr9	44521925	44522125	+	9.38	0.722	intron (NM_007551, intron 1 of 1)	intron (NM_007551, intron 1 of 1)	4396	NM_007551	12145	Mm.6246	NM_007551	ENSMUSG00000047880	Cxcr5	Blr1|CXC-R5|CXCR-5|Gpcr6|MDR15	chemokine (C-X-C motif) receptor 5	protein-coding
chr3-377	chr3	64204145	64204345	+	9.38	0.821	Intergenic	Intergenic	-66765	NM_001104592	100125586	Mm.469888	NM_001104592	ENSMUSG00000043897	Vmn2r2	ENSMUSG00000043897	vomeronasal 2, receptor 2	protein-coding
chr12-249	chr12	48868624	48868824	+	9.38	0.721	Intergenic	Lx10|LINE|L1	-514159	NM_001160112	15228	Mm.4704	NM_008241	ENSMUSG00000020950	Foxg1	2900064B05Rik|BF-1|Bf1|Hfh9|Hfhbf1	forkhead box G1	protein-coding
chr14-186	chr14	45669854	45670054	+	9.38	0.837	Intergenic	Intergenic	-11811	NM_001042719	114874	Mm.121918	NM_176845	ENSMUSG00000037697	Ddhd1	Mir5131|PA-PLA1	DDHD domain containing 1	protein-coding
chr8-325	chr8	71903099	71903299	+	9.38	0.878	Intergenic	MTD|LTR|ERVL-MaLR	-5407	NM_001166645	382019	Mm.251482	NM_001166645	ENSMUSG00000089857	Zfp882	ENSMUSG00000052439|Gm15468|OTTMUSG00000022410	zinc finger protein 882	protein-coding
chr14-130	chr14	24238210	24238410	+	9.38	0.9	intron (NM_001163513, intron 1 of 31)	intron (NM_001163513, intron 1 of 31)	7610	NM_001163513	71228	Mm.68971	NM_027726	ENSMUSG00000021782	Dlg5	4933429D20Rik|T25557|mKIAA0583	discs, large homolog 5 (Drosophila)	protein-coding
chr14-287	chr14	19975803	19976003	+	9.38	0.75	intron (NM_001285908, intron 1 of 3)	intron (NM_001285908, intron 1 of 3)	790	NM_001285911	14702	Mm.41737	NM_010315	ENSMUSG00000043004	Gng2	-	guanine nucleotide binding protein (G protein), gamma 2	protein-coding
chr7-585	chr7	86835166	86835366	+	9.38	0.846	Intergenic	Intergenic	40125	NM_001105188	546983	Mm.469904	NM_001105188	ENSMUSG00000090949	Vmn2r77	EG546983	vomeronasal 2, receptor 77	protein-coding
chr6-981	chr6	89934083	89934283	+	9.38	0.81	5' UTR (NM_011684, exon 2 of 2)	5' UTR (NM_011684, exon 2 of 2)	6324	NM_011684	22297	Mm.431981	NM_011684	ENSMUSG00000044248	Vmn1r45	V1RA9|V1r2|V1ra11|V1ra2|mV1R2	vomeronasal 1 receptor 45	protein-coding
chr14-227	chr14	73107262	73107462	+	9.38	0.725	Intergenic	Intergenic	-35148	NM_001170694	105670	Mm.280068	NM_134083	ENSMUSG00000022106	Rcbtb2	2610028E02Rik|2810420M18Rik|AI448345|AW240694|Chc1l|RC/BTB2	regulator of chromosome condensation (RCC1) and BTB (POZ) domain containing protein 2	protein-coding
chr4-354	chr4	59809279	59809479	+	9.38	0.8	intron (NM_172468, intron 1 of 8)	intron (NM_172468, intron 1 of 8)	3729	NM_172468	209131	Mm.259705	NM_172468	ENSMUSG00000028385	Snx30	4732481H14Rik|C030041J06Rik	sorting nexin family member 30	protein-coding
chr2-448	chr2	169102469	169102669	+	9.38	0.787	Intergenic	B1_Mur4|SINE|Alu	124300	NR_040326	75508	Mm.271256	NR_040326	ENSMUSG00000086348	1700017J07Rik	-	RIKEN cDNA 1700017J07 gene	ncRNA
chr10-583	chr10	115246754	115246954	+	9.38	0.773	intron (NM_025706, intron 1 of 16)	RSINE1|SINE|B4	4639	NM_025706	66687	Mm.22252	NM_025706	ENSMUSG00000020130	Tbc1d15	4432405K22Rik|AU022358|AU023730|AW557774|Ly6dl|Rab7-GAP	TBC1 domain family, member 15	protein-coding
chr6-513	chr6	114361786	114361986	+	9.38	0.83	Intergenic	(CAGGA)n|Simple_repeat|Simple_repeat	-36050	NM_008285	15465	Mm.333327	NM_008285	ENSMUSG00000053004	Hrh1	Bphs|H1R|HH1R|Hir	histamine receptor H1	protein-coding
chr11-258	chr11	104626665	104626865	+	9.38	0.808	intron (NM_016780, intron 2 of 14)	intron (NM_016780, intron 2 of 14)	18765	NM_016780	16416	Mm.87150	NM_016780	ENSMUSG00000020689	Itgb3	CD61|GP3A|INGRB3	integrin beta 3	protein-coding
chr11-311	chr11	83176834	83177034	+	9.38	0.804	intron (NM_001302559, intron 3 of 6)	intron (NM_001302559, intron 3 of 6)	1748	NM_001302559	20558	Mm.38192	NM_011410	ENSMUSG00000000204	Slfn4	AI450778	schlafen 4	protein-coding
chr12-1208	chr12	49148285	49148485	+	9.38	0.857	Intergenic	MTD|LTR|ERVL-MaLR	-234498	NM_001160112	15228	Mm.4704	NM_008241	ENSMUSG00000020950	Foxg1	2900064B05Rik|BF-1|Bf1|Hfh9|Hfhbf1	forkhead box G1	protein-coding
chr12-416	chr12	110737376	110737576	+	9.38	0.583	promoter-TSS (NM_027149)	promoter-TSS (NM_027149)	-473	NM_027149	69641	Mm.475762	NM_027149	ENSMUSG00000037957	Wdr20	2310040A13Rik|AI549910|Wdr20a	WD repeat domain 20	protein-coding
chr16-359	chr16	11077652	11077852	+	9.38	0.902	intron (NM_134105, intron 4 of 4)	intron (NM_134105, intron 4 of 4)	10178	NM_134105	106200	Mm.291015	NM_029582	ENSMUSG00000022498	Txndc11	2810408E11Rik|AI427833|EFP1|Txdc11	thioredoxin domain containing 11	protein-coding
chr6-350	chr6	47748393	47748593	+	9.38	0.947	Intergenic	Intergenic	-4262	NR_002841	19799		NR_002841		Rn4.5s	-	4.5S RNA	rRNA
chr17-174	chr17	80151967	80152167	+	9.38	0.783	intron (NM_176963, intron 4 of 6)	intron (NM_176963, intron 4 of 6)	24596	NM_176963	319625	Mm.29098	NM_176963	ENSMUSG00000035473	Galm	A530057M15Rik|AU015645|AU020959	galactose mutarotase	protein-coding
chr14-196	chr14	73194641	73194841	+	9.38	0.82	TTS (NM_009029)	TTS (NM_009029)	12110	NR_030459	751541		NR_030459	ENSMUSG00000076121	Mir687	Mirn687|mir-687|mmu-mir-687	microRNA 687	ncRNA
chr4-288	chr4	149533553	149533753	+	9.38	0.74	intron (NM_023465, intron 1 of 4)	intron (NM_023465, intron 1 of 4)	-4210	NR_049189	100885828		NR_049189	ENSMUSG00000093403	Mir5616	Gm25191|mir-5616|mmu-mir-5616	microRNA 5616	ncRNA
chr5-168	chr5	21426652	21426852	+	9.38	0.769	intron (NM_177869, intron 1 of 7)	intron (NM_177869, intron 1 of 7)	1849	NM_177869	330050	Mm.40655	NM_177869	ENSMUSG00000047221	Fam185a	4631428I10|AI847670	family with sequence similarity 185, member A	protein-coding
chr19-206	chr19	29883698	29883898	+	9.38	0.886	Intergenic	Intergenic	-41316	NM_133775	77125	Mm.182359	NM_133775	ENSMUSG00000024810	Il33	9230117N10Rik|Il-33|Il1f11|NF-HEV	interleukin 33	protein-coding
chr3-172	chr3	89893167	89893367	+	9.38	0.677	intron (NM_001310676, intron 1 of 9)	intron (NM_001310676, intron 1 of 9)	19929	NM_001310676	16194	Mm.2856	NM_010559	ENSMUSG00000027947	Il6ra	CD126|IL-6R|IL-6R-alpha|IL-6RA|Il6r	interleukin 6 receptor, alpha	protein-coding
chr2-641	chr2	24299862	24300062	+	9.38	0.739	Intergenic	Intergenic	8766	NM_153077	215274	Mm.218750	NM_153077	ENSMUSG00000046845	Il1f10	-	interleukin 1 family, member 10	protein-coding
chr11-192	chr11	75324418	75324618	+	9.38	0.766	intron (NM_026653, intron 5 of 16)	intron (NM_026653, intron 5 of 16)	23865	NM_001164223	68275	Mm.102574	NM_026653	ENSMUSG00000000751	Rpa1	5031405K23Rik|70kDa|AA589576|AW557552|RF-A|RP-A|Rpa	replication protein A1	protein-coding
chr6-892	chr6	146520519	146520719	+	9.38	0.702	Intergenic	Intergenic	-18396	NM_019923	16439	Mm.7800	NM_010586	ENSMUSG00000030287	Itpr2	AI649341|InsP3R-2|InsP3R-5|Ip3r2|Itpr5|insP3R2	inositol 1,4,5-triphosphate receptor 2	protein-coding
chr13-170	chr13	54589452	54589652	+	9.38	0.708	promoter-TSS (NM_025933)	promoter-TSS (NM_025933)	522	NM_178605	28126	Mm.439993	NM_178605	ENSMUSG00000025869	Nop16	AA409471|D13Wsu177e	NOP16 nucleolar protein	protein-coding
chr11-480	chr11	86806363	86806563	+	9.38	0.661	exon (NM_026191, exon 2 of 18)	exon (NM_026191, exon 2 of 18)	1197	NM_026191	67487	Mm.260627	NM_026191	ENSMUSG00000018425	Dhx40	2410016C14Rik|ARG147|DDX40|PAD	DEAH (Asp-Glu-Ala-His) box polypeptide 40	protein-coding
chr12-979	chr12	4287678	4287878	+	9.38	0.837	intron (NM_010881, intron 13 of 22)	L1_Mus1|LINE|L1	-53484	NM_134046	52504	Mm.70546	NM_134046	ENSMUSG00000020652	Cenpo	2810429O05Rik|8430427C03Rik|D12Ertd482e	centromere protein O	protein-coding
chr4-133	chr4	108482920	108483120	+	9.38	0.681	intron (NM_175472, intron 3 of 30)	B1_Mur1|SINE|Alu	23594	NM_175472	230594	Mm.25181	NM_175472	ENSMUSG00000034610	Zcchc11	6030404K05Rik|9230115F04Rik|PPAPD3|mKIAA0191	zinc finger, CCHC domain containing 11	protein-coding
chr3-148	chr3	64256757	64256957	+	9.38	0.691	Intergenic	BGLII_Mus|LTR|ERVK	30560	NM_001104614	637004	Mm.469887	NM_001104614	ENSMUSG00000091572	Vmn2r3	EG637004	vomeronasal 2, receptor 3	protein-coding
chr8-391	chr8	25094045	25094245	+	9.38	0.833	intron (NM_031257, intron 1 of 11)	B1F|SINE|Alu	7666	NM_031257	83436	Mm.261122	NM_031257	ENSMUSG00000031557	Plekha2	6430512N22Rik|AI851530|AU041791|TAPP2|W91773	pleckstrin homology domain-containing, family A (phosphoinositide binding specific) member 2	protein-coding
chr11-687	chr11	23194349	23194549	+	9.38	0.795	Intergenic	L1Md_F|LINE|L1	42309	NR_131065	76993	Mm.59224	NR_131065	ENSMUSG00000086366	1700061J23Rik	-	RIKEN cDNA 1700061J23 gene	ncRNA
chr13-461	chr13	94811134	94811334	+	9.38	0.818	intron (NM_009321, intron 1 of 3)	intron (NM_009321, intron 1 of 3)	22291	NM_009321	21371	Mm.379025	NM_009321	ENSMUSG00000042043	Tbca	Tbca13	tubulin cofactor A	protein-coding
chr11-273	chr11	74533154	74533354	+	9.38	0.621	intron (NM_001015046, intron 2 of 24)	intron (NM_001015046, intron 2 of 24)	56904	NM_001015046	380711	Mm.425690	NM_001015046	ENSMUSG00000038807	Rap1gap2	AU067654|Garnl4|Gm1561|mKIAA1039	RAP1 GTPase activating protein 2	protein-coding
chr12-519	chr12	100622566	100622766	+	9.38	0.881	intron (NM_153587, intron 3 of 17)	L1M4|LINE|L1	-101844	NM_001033213	104718	Mm.295441	NM_001033213	ENSMUSG00000033530	Ttc7b	AA408451|Ttc7l1	tetratricopeptide repeat domain 7B	protein-coding
chr12-536	chr12	119012826	119013026	+	9.38	0.902	Intergenic	L1Md_A|LINE|L1	-46505	NM_029961	77706	Mm.261496	NM_029961	ENSMUSG00000072791	Abcb5	9230106F14Rik	ATP-binding cassette, sub-family B (MDR/TAP), member 5	protein-coding
chr15-356	chr15	39107714	39107914	+	9.38	0.778	intron (NM_172402, intron 1 of 6)	intron (NM_172402, intron 1 of 6)	4902	NM_172402	69906	Mm.17875	NM_172402	ENSMUSG00000022299	Slc25a32	2610043O12Rik|Mftc	solute carrier family 25, member 32	protein-coding
chr7-289	chr7	100149100	100149300	+	9.38	0.7	Intergenic	Intergenic	-10077	NM_026010	67164	Mm.46777	NM_026010	ENSMUSG00000030725	Lipt2	2610209A20Rik	lipoyl(octanoyl) transferase 2 (putative)	protein-coding
chr16-189	chr16	38742662	38742862	+	9.38	0.905	intron (NM_001285793, intron 1 of 6)	intron (NM_001285793, intron 1 of 6)	503	NM_001285793	56375	Mm.182377	NM_019804	ENSMUSG00000022793	B4galt4	9130402O08Rik|B4galt-IV|b4Gal-T4|beta4Gal-T4|beta4GalT-IV	UDP-Gal:betaGlcNAc beta 1,4-galactosyltransferase, polypeptide 4	protein-coding
chr2-433	chr2	120261527	120261727	+	9.38	0.788	Intergenic	Intergenic	-16292	NM_177845	329502	Mm.330505	NM_177845	ENSMUSG00000050211	Pla2g4e	2310026J01Rik|C230096D22|Pla2epsilon	phospholipase A2, group IVE	protein-coding
chr9-313	chr9	21002475	21002675	+	9.38	0.773	promoter-TSS (NM_023167)	promoter-TSS (NM_023167)	-162	NM_023167	66163	Mm.427576	NM_023167	ENSMUSG00000003299	Mrpl4	1110017G11Rik	mitochondrial ribosomal protein L4	protein-coding
chr1-519	chr1	64190907	64191107	+	9.38	0.776	Intergenic	Intergenic	-69618	NM_033563	93691	Mm.29466	NM_033563	ENSMUSG00000025959	Klf7	9830124P08Rik	Kruppel-like factor 7 (ubiquitous)	protein-coding
chr5-113	chr5	105110296	105110496	+	9.38	0.709	promoter-TSS (NM_172777)	promoter-TSS (NM_172777)	-104	NM_172777	236573	Mm.425261	NM_172777	ENSMUSG00000029298	Gbp9	-	guanylate-binding protein 9	protein-coding
chr16-114	chr16	83905749	83905949	+	9.38	0.76	Intergenic	RLTR13B1|LTR|ERVK	-465294	NR_040567	75247	Mm.417813	NR_040567		4930553E22Rik	-	RIKEN cDNA 4930553E22 gene	ncRNA
chr4-418	chr4	62517444	62517644	+	9.38	0.787	intron (NM_008525, intron 1 of 11)	intron (NM_008525, intron 1 of 11)	2365	NM_001276446	17025	Mm.6988	NM_008525	ENSMUSG00000028393	Alad	ALADH|Lv	aminolevulinate, delta-, dehydratase	protein-coding
chr4-227	chr4	22631820	22632020	+	9.38	0.8	Intergenic	L1Md_T|LINE|L1	141372	NR_131335	105500046		NR_131335	ENSMUSG00000107859	Gm30731	Pnky|lnc-pou3f2	predicted gene, 30731	ncRNA
chr3-276	chr3	18339080	18339280	+	9.38	0.75	Intergenic	Intergenic	-95842	NM_007825	13123	Mm.316000	NM_007825	ENSMUSG00000039519	Cyp7b1	AW261589|D3Ertd552e|hct-1	cytochrome P450, family 7, subfamily b, polypeptide 1	protein-coding
chr11-291	chr11	117663455	117663655	+	9.38	0.6	intron (NM_198022, intron 1 of 21)	intron (NM_198022, intron 1 of 21)	9266	NM_198022	217351	Mm.40272	NM_198022	ENSMUSG00000025571	Tnrc6c	9930033H14Rik|mKIAA1582	trinucleotide repeat containing 6C	protein-coding
chr9-226	chr9	48763991	48764191	+	9.38	0.857	intron (NM_001033324, intron 2 of 6)	intron (NM_001033324, intron 2 of 6)	71854	NM_001033324	235320	Mm.457803	NM_001033324	ENSMUSG00000066687	Zbtb16	AI467657|PLZF|Zfp145|lu	zinc finger and BTB domain containing 16	protein-coding
chr16-161	chr16	10489363	10489563	+	9.38	0.709	promoter-TSS (NM_001243761)	promoter-TSS (NM_001243761)	-318	NM_001243761	12265	Mm.249560	NM_007575	ENSMUSG00000022504	Ciita	C2ta|EG669998|Gm9475|Mhc2ta	class II transactivator	protein-coding
chr1-395	chr1	88584491	88584691	+	9.38	0.714	Intergenic	Intergenic	33074	NR_037971	100503197	Mm.99352	NR_037971	ENSMUSG00000100798	Gm19589	-	predicted gene, 19589	ncRNA
chr17-87	chr17	25981098	25981298	+	9.38	0.7	Intergenic	Intergenic	-15693	NM_015830	50817	Mm.216072	NM_015830	ENSMUSG00000037326	Capn15	Solh	calpain 15	protein-coding
chr8-394	chr8	26895785	26895985	+	9.38	0.725	Intergenic	ORR1B2|LTR|ERVL-MaLR	-71462	NR_045904	72316	Mm.490534	NR_045904	ENSMUSG00000100335	2310008N11Rik	-	RIKEN cDNA 2310008N11 gene	ncRNA
chr2-353	chr2	34800899	34801099	+	9.38	0.818	Intergenic	Intergenic	-1087	NM_145522	227746	Mm.158705	NM_145522	ENSMUSG00000070953	Rabepk	8430412M01Rik|9530020D24Rik|AV073337|C87311|Rab9p40	Rab9 effector protein with kelch motifs	protein-coding
chr5-137	chr5	43270950	43271150	+	9.38	0.759	intron (NM_001177379, intron 5 of 10)	intron (NM_001177379, intron 5 of 10)	-35696	NR_028417	665934	Mm.381491	NR_028417	ENSMUSG00000085720	Gm7854	EG665934|ENSMUSG00000054483	predicted gene 7854	ncRNA
chr19-202	chr19	15890620	15890820	+	9.38	0.844	Intergenic	Lx5c|LINE|L1	33902	NM_001205339	107272	Mm.289936	NM_177420	ENSMUSG00000024640	Psat1	D8Ertd814e|EPIP|PSA|Psat	phosphoserine aminotransferase 1	protein-coding
chr2-148	chr2	90496337	90496537	+	9.38	0.651	intron (NM_008982, intron 1 of 23)	intron (NM_008982, intron 1 of 23)	-17263	NM_001135657	19271	Mm.330393	NM_008982	ENSMUSG00000025314	Ptprj	AI450271|BET|Byp|CD148|DEP-1|PTPbeta2|Ptpb2|RPTPJ|Scc-1|Scc1	protein tyrosine phosphatase, receptor type, J	protein-coding
chr8-517	chr8	20947135	20947335	+	9.38	0.769	Intergenic	RLTR10-int|LTR|ERVK	-2487	NM_001012640	100503970	Mm.490241	NM_001012640	ENSMUSG00000079120	AY761185	-	cDNA sequence AY761185	protein-coding
chr14-177	chr14	7662614	7662814	+	9.38	0.9	Intergenic	Intergenic	-94148	NM_001270842	100041874	Mm.350858	NM_001270842	ENSMUSG00000079364	Gm3558	ENSMUSG00000079364	predicted gene 3558	protein-coding
chr6-258	chr6	129098142	129098342	+	9.38	0.559	intron (NM_153506, intron 2 of 4)	intron (NM_153506, intron 2 of 4)	2661	NM_153506	232409	Mm.30870	NM_153506	ENSMUSG00000030155	Clec2e	Clra|clr-a	C-type lectin domain family 2, member e	protein-coding
chr2-132	chr2	173173030	173173230	+	9.38	0.816	Intergenic	Intergenic	20057	NM_011044	18534	Mm.266867	NM_011044	ENSMUSG00000027513	Pck1	AI265463|PEPCK|Pck-1	phosphoenolpyruvate carboxykinase 1, cytosolic	protein-coding
chr2-358	chr2	43739173	43739373	+	9.38	0.709	Intergenic	Intergenic	-9551	NM_001301832	76117	Mm.217350	NM_153820	ENSMUSG00000049744	Arhgap15	5830480G12Rik	Rho GTPase activating protein 15	protein-coding
chr6-558	chr6	29637190	29637390	+	9.38	0.925	Intergenic	Intergenic	-27683	NM_177296	320938	Mm.276381	NM_177296	ENSMUSG00000012535	Tnpo3	5730544L10Rik|C430013M08Rik|C81142|D6Ertd313e|Trn-SR|mKIAA4133	transportin 3	protein-coding
chr12-260	chr12	4841916	4842116	+	9.38	0.656	promoter-TSS (NM_016863)	promoter-TSS (NM_016863)	-421	NM_016863	14226	Mm.20453	NM_016863	ENSMUSG00000020635	Fkbp1b	12.6kDa|AW494148|FKBP12.6|calstabin2	FK506 binding protein 1b	protein-coding
chr7-188	chr7	6384111	6384311	+	9.38	0.796	exon (NM_175247, exon 2 of 7)	exon (NM_175247, exon 2 of 7)	893	NM_175247	22690	Mm.127014	NM_175247	ENSMUSG00000062861	Zfp28	2810438M17Rik|Zfp-28|mkr-5	zinc finger protein 28	protein-coding
chr17-279	chr17	13442549	13442749	+	9.38	0.796	Intergenic	B2_Mm2|SINE|B2	-78807	NR_030763	272667	Mm.444718	NR_030763	ENSMUSG00000079711	Smok4a	4930513D10Rik|Smok2c	sperm motility kinase 4A	pseudo
chr2-775	chr2	180709783	180709983	+	9.38	0.857	promoter-TSS (NM_001289651)	promoter-TSS (NM_001289651)	116	NM_177852	23856	Mm.253836	NM_011805	ENSMUSG00000038914	Dido1	6720461J16Rik|D130048F08Rik|DATF-1|DIO-1|Datf1|dido	death inducer-obliterator 1	protein-coding
chr2-315	chr2	76049614	76049814	+	9.38	0.679	intron (NM_001081033, intron 14 of 19)	intron (NM_001081033, intron 14 of 19)	-67747	NM_030188	78802	Mm.282339	NM_030188	ENSMUSG00000075271	Ttc30a1	4930506L13Rik	tetratricopeptide repeat domain 30A1	protein-coding
chr4-188	chr4	147401263	147401463	+	9.38	0.673	intron (NM_001039209, intron 1 of 2)	RLTR10-int|LTR|ERVK	-151914	NM_001014397	433804	Mm.332047	NM_001014397	ENSMUSG00000065999	Zfp985	Gm13154|OTTMUSG00000010673	zinc finger protein 985	protein-coding
chr7-168	chr7	4060827	4061027	+	9.38	0.698	intron (NM_001302675, intron 1 of 6)	MMETn-int|LTR|ERVK	2277	NM_001302677	52855	Mm.290880	NM_178611	ENSMUSG00000055541	Lair1	5133400O11Rik|BB115266|D7Bwg0421e|Lair-1	leukocyte-associated Ig-like receptor 1	protein-coding
chr16-125	chr16	38606241	38606441	+	9.38	0.867	intron (NM_020260, intron 11 of 11)	intron (NM_020260, intron 11 of 11)	43527	NM_026407	67846	Mm.310476	NM_026407	ENSMUSG00000002845	Tmem39a	2610033C09Rik	transmembrane protein 39a	protein-coding
chr15-209	chr15	27702907	27703107	+	9.38	0.731	Intergenic	Intergenic	-21465	NM_001242423	223433	Mm.266485	NM_198301	ENSMUSG00000056069	Fam105a	9830126M18	family with sequence similarity 105, member A	protein-coding
chr13-99	chr13	49054972	49055172	+	9.38	0.642	intron (NM_001290311, intron 23 of 28)	intron (NM_001290311, intron 23 of 28)	86960	NR_015601	68128	Mm.426304	NR_015601		Fam120aos	C030044B11Rik	family with sequence similarity 120A, opposite strand	ncRNA
chr18-332	chr18	74583666	74583866	+	9.38	0.8	intron (NM_201600, intron 4 of 38)	RLTR40|LTR|ERVK	-52642	NR_045368	73606	Mm.444734	NR_045368		1700120E14Rik	-	RIKEN cDNA 1700120E14 gene	ncRNA
chr14-237	chr14	20496075	20496275	+	9.38	0.714	intron (NM_029104, intron 1 of 6)	intron (NM_029104, intron 1 of 6)	726	NM_029104	74843	Mm.295241	NM_029104	ENSMUSG00000021815	Mss51	4833444M15Rik|Zmynd17	MSS51 mitochondrial translational activator	protein-coding
chr9-373	chr9	63006200	63006400	+	9.38	0.905	Intergenic	Intergenic	-25421	NM_019663	56469	Mm.431253	NM_019663	ENSMUSG00000032405	Pias1	2900068C24Rik|Ddxbp1|GBP	protein inhibitor of activated STAT 1	protein-coding
chr11-381	chr11	71159541	71159741	+	9.38	0.691	intron (NM_001162414, intron 11 of 13)	CT-rich|Low_complexity|Low_complexity	-14937	NM_001004142	195046	Mm.240227	NM_001004142	ENSMUSG00000069830	Nlrp1a	CARD7|DEFCAP|Gm14|Gm15|NAC|Nalp1|Nalp1a|Nlrp1|PP1044	NLR family, pyrin domain containing 1A	protein-coding
chr8-181	chr8	111029795	111029995	+	9.38	0.75	intron (NM_001190786, intron 1 of 11)	RLTR31_Mm|LTR|ERVK	1856	NM_001190786	234733	Mm.482176	NM_172284	ENSMUSG00000033658	Ddx19b	2810457M08Rik|4921519L13Rik|AW260119	DEAD (Asp-Glu-Ala-Asp) box polypeptide 19b	protein-coding
chr4-345	chr4	40702212	40702412	+	9.38	0.818	intron (NM_001025444, intron 1 of 7)	intron (NM_001025444, intron 1 of 7)	604	NM_025545	66408	Mm.430710	NM_025545	ENSMUSG00000028411	Aptx	2410016G21Rik|AA388047|FHA-HIT	aprataxin	protein-coding
chr4-130	chr4	45067718	45067918	+	9.38	0.75	intron (NM_001024142, intron 1 of 10)	intron (NM_001024142, intron 1 of 10)	16786	NM_001024142	269529	Mm.389552	NM_001024142	ENSMUSG00000048232	Fbxo10	FBX10|Gm634	F-box protein 10	protein-coding
chr14-194	chr14	71385609	71385809	+	9.12	0.947	Intergenic	L1_Mus3|LINE|L1	134436	NR_046076	100043132	Mm.399336	NR_046075		Gm4251	-	predicted gene 4251	ncRNA
chr2-669	chr2	61678246	61678446	+	9.12	0.78	Intergenic	Intergenic	-33348	NM_021526	59029	Mm.218198	NM_021526	ENSMUSG00000026914	Psmd14	2610312C03Rik|3200001M20Rik|AA986732|Pad1|Poh1|rpm11	proteasome (prosome, macropain) 26S subunit, non-ATPase, 14	protein-coding
chr1-206	chr1	170853949	170854149	+	9.12	0.755	intron (NM_001081304, intron 2 of 15)	RMER17A|LTR|ERVK	13722	NM_001081304	226641	Mm.377046	NM_001081304	ENSMUSG00000026663	Atf6	9130025P16Rik|9630036G24|AA789574|Atf6alpha|ESTM49	activating transcription factor 6	protein-coding
chr1-192	chr1	24680921	24681121	+	9.12	0.654	intron (NM_001310483, intron 1 of 15)	B2_Mm2|SINE|B2	2103	NM_001310483	68421	Mm.336563	NM_026719	ENSMUSG00000073725	Lmbrd1	0910001K20Rik|AV347960	LMBR1 domain containing 1	protein-coding
chr4-401	chr4	3743814	3744014	+	9.12	0.875	intron (NM_010747, intron 4 of 12)	(CATA)n|Simple_repeat|Simple_repeat	28950	NR_028126	70720	Mm.445696	NR_028126		6330407A03Rik	-	RIKEN cDNA 6330407A03 gene	ncRNA
chr5-319	chr5	105520655	105520855	+	9.12	0.759	intron (NM_133897, intron 1 of 3)	intron (NM_133897, intron 1 of 3)	1284	NM_133897	100604	Mm.319847	NM_133897	ENSMUSG00000054720	Lrrc8c	AD158|AI326115|E430036I04Rik|fad158	leucine rich repeat containing 8 family, member C	protein-coding
chr15-123	chr15	77627842	77628042	+	9.12	0.734	TTS (NR_033577)	TTS (NR_033577)	8974	NR_033577	666661	Mm.390818	NR_033577		Gm8221	-	apolipoprotein L 7c pseudogene	pseudo
chr8-357	chr8	20814177	20814377	+	9.12	0.714	Intergenic	L1VL1|LINE|L1	-62222	NR_002880	654455	Mm.424927	NR_002880		Gm21944	Defb48-ps	defensin beta 48 pseudogene	pseudo
chr11-708	chr11	50053568	50053768	+	9.12	0.76	intron (NM_001290749, intron 2 of 7)	intron (NM_001290749, intron 2 of 7)	-16034	NR_029769	723845		NR_029769	ENSMUSG00000065417	Mir340	Mirn340|mir-340|mmu-mir-340	microRNA 340	ncRNA
chr2-625	chr2	12117008	12117208	+	9.12	0.771	intron (NM_001001309, intron 28 of 29)	intron (NM_001001309, intron 28 of 29)	-184138	NR_040353	338535	Mm.483275	NR_040353	ENSMUSG00000086843	E030013I19Rik	-	RIKEN cDNA E030013I19 gene	ncRNA
chr7-248	chr7	73972247	73972447	+	9.12	0.636	intron (NM_009181, intron 2 of 5)	intron (NM_009181, intron 2 of 5)	41335	NM_009181	20450	Mm.4954	NM_009181	ENSMUSG00000025789	St8sia2	AI323367|ST8SiaII|STX|Siat8b	ST8 alpha-N-acetyl-neuraminide alpha-2,8-sialyltransferase 2	protein-coding
chr19-176	chr19	34846839	34847039	+	9.12	0.75	intron (NM_001114339, intron 1 of 6)	LTR72_RN|LTR|ERV1	-26166	NR_029783	723826		NR_029783	ENSMUSG00000065594	Mir107	Mirn107|mir-107|mmu-mir-107	microRNA 107	ncRNA
chr10-229	chr10	67504059	67504259	+	9.12	0.745	Intergenic	Intergenic	-33710	NM_010118	13654	Mm.290421	NM_010118	ENSMUSG00000037868	Egr2	Egr-2|Krox-20|Krox20|NGF1-B|Zfp-25|Zfp-6	early growth response 2	protein-coding
chr1-268	chr1	4764529	4764729	+	9.12	0.804	Intergenic	Intergenic	21097	NR_033530	27395	Mm.182927	NM_025300	ENSMUSG00000033845	Mrpl15	HSPC145|MRP-L7|Rpml7	mitochondrial ribosomal protein L15	protein-coding
chr19-254	chr19	46919083	46919283	+	9.12	0.661	intron (NR_028353, intron 3 of 18)	intron (NR_028353, intron 3 of 18)	43168	NM_029810	76952	Mm.40965	NM_029810	ENSMUSG00000025041	Nt5c2	2010002I23Rik|CnII|ENSMUSG00000025039|Gm9751|Gmp|Nt5b|Pnt5|cN-II	5'-nucleotidase, cytosolic II	protein-coding
chr12-792	chr12	110690274	110690474	+	9.12	0.708	TTS (NM_010480)	TTS (NM_010480)	6021	NM_010480	15519	Mm.1843	NM_010480	ENSMUSG00000021270	Hsp90aa1	86kDa|89kDa|AL024080|AL024147|Hsp86-1|Hsp89|Hsp90|Hspca|hsp4	heat shock protein 90, alpha (cytosolic), class A member 1	protein-coding
chrX-11	chrX	37023088	37023288	+	9.12	0.82	Intergenic	L2a|LINE|L2	-25657	NM_173779	245381	Mm.123697	NM_173779	ENSMUSG00000044400	Sowahd	A630014H24Rik|Ankrd58	sosondowah ankyrin repeat domain family member D	protein-coding
chr5-257	chr5	134989027	134989227	+	9.12	0.81	intron (NR_026907, intron 4 of 4)	intron (NR_026907, intron 4 of 4)	2913	NM_009902	12739	Mm.158662	NM_009902	ENSMUSG00000070473	Cldn3	AI182374|Cpetr2|mRVP1	claudin 3	protein-coding
chr16-146	chr16	13427314	13427514	+	9.12	0.714	Intergenic	Intergenic	-22109	NR_030549	100124432		NR_030549	ENSMUSG00000076972	Mir193b	Mir193|Mirn193b|mir-193b	microRNA 193b	ncRNA
chr2-291	chr2	121508752	121508952	+	9.12	0.761	intron (NM_001290987, intron 1 of 11)	B4|SINE|B4	2129	NM_001290986	241627	Mm.293284	NM_030234	ENSMUSG00000027242	Wdr76	5830411K18Rik|6030457D09|AA517836	WD repeat domain 76	protein-coding
chr12-1132	chr12	10692919	10693119	+	9.12	0.696	Intergenic	MLT1A0|LTR|ERVL-MaLR	246631	NR_110487	328061	Mm.56067	NR_110487		Gm38407	4931412M21	predicted gene, 38407	ncRNA
chr6-454	chr6	100576325	100576525	+	9.12	0.776	intron (NM_181590, intron 10 of 10)	intron (NM_181590, intron 10 of 10)	49025	NR_040525	73395	Mm.69413	NR_040525	ENSMUSG00000101553	1700049E22Rik	-	RIKEN cDNA 1700049E22 gene	ncRNA
chr7-205	chr7	116504968	116505168	+	9.12	0.704	intron (NM_001130479, intron 1 of 13)	intron (NM_001130479, intron 1 of 13)	699	NM_001130479	53322	Mm.9901	NM_016773	ENSMUSG00000030659	Nucb2	AI607786|Calnuc|Nefa|Nesfatin-1	nucleobindin 2	protein-coding
chr10-129	chr10	130144020	130144220	+	9.12	0.755	Intergenic	MMVL30-int|LTR|ERV1	-17065	NM_146674	258669	Mm.377631	NM_146674	ENSMUSG00000095804	Olfr824	MOR210-3	olfactory receptor 824	protein-coding
chr8-497	chr8	116353869	116354069	+	9.12	0.648	Intergenic	Intergenic	-151046	NM_029297	75465	Mm.23114	NM_029297	ENSMUSG00000034467	Dynlrb2	1700009A04Rik|DNLC2B|Dncl2b	dynein light chain roadblock-type 2	protein-coding
chr9-417	chr9	31090714	31090914	+	9.12	0.745	intron (NM_011176, intron 17 of 18)	intron (NM_011176, intron 17 of 18)	40985	NM_011176	19143	Mm.243926	NM_011176	ENSMUSG00000031995	St14	Epithin|MT-SP1|Prss14|Tmprss14|mCAP3|matriptase	suppression of tumorigenicity 14 (colon carcinoma)	protein-coding
chr19-160	chr19	60757265	60757465	+	9.12	0.809	3' UTR (NM_178421, exon 1 of 1)	3' UTR (NM_178421, exon 1 of 1)	1378	NM_178421	332397	Mm.186390	NM_178421	ENSMUSG00000072437	Nanos1	NOS-1	nanos homolog 1 (Drosophila)	protein-coding
chr8-443	chr8	121841626	121841826	+	9.12	0.714	Intergenic	B1_Mur4|SINE|Alu	-12157	NM_145605	234825	Mm.209329	NM_145605	ENSMUSG00000040263	Klhdc4	AA408426|AV352552|BC012312|G430025P05Rik	kelch domain containing 4	protein-coding
chr4-161	chr4	107219598	107219798	+	9.12	0.796	Intergenic	Intergenic	10518	NM_001081272	546840	Mm.331755	NM_001081272	ENSMUSG00000070877	Ldlrad1	OTTMUSG00000008594	low density lipoprotein receptor class A domain containing 1	protein-coding
chr14-131	chr14	27236049	27236249	+	9.12	0.875	intron (NM_001289686, intron 3 of 12)	intron (NM_001289686, intron 3 of 12)	-1861	NM_027871	71704	Mm.248606	NM_027871	ENSMUSG00000021895	Arhgef3	1200004I24Rik|9830169H03Rik|C76747|Xpln	Rho guanine nucleotide exchange factor (GEF) 3	protein-coding
chr18-107	chr18	62029225	62029425	+	9.12	0.687	Intergenic	RLTR17B_Mm|LTR|ERVK	76250	NM_172628	225608	Mm.262320	NM_172628	ENSMUSG00000045629	Sh3tc2	D430044G18Rik	SH3 domain and tetratricopeptide repeats 2	protein-coding
chr10-584	chr10	116473016	116473216	+	9.12	0.68	promoter-TSS (NR_130644)	promoter-TSS (NR_130644)	-47	NR_130644	100504412	Mm.398212	NR_130644	ENSMUSG00000085837	Kcnmb4os2	4933400F03Rik	potassium large conductance calcium-activated channel, subfamily M, beta member 4, opposite strand 2	ncRNA
chr12-655	chr12	77185695	77185895	+	9.12	0.881	Intergenic	MTD|LTR|ERVL-MaLR	-52309	NM_001252614	53618	Mm.35628	NM_016893	ENSMUSG00000021065	Fut8	-	fucosyltransferase 8	protein-coding
chr1-275	chr1	43879037	43879237	+	9.12	0.741	Intergenic	Intergenic	-51429	NM_026430	67883	Mm.387202	NM_026430	ENSMUSG00000057363	Uxs1	1600025I13Rik|AI451869|AI649125|AW550562	UDP-glucuronate decarboxylase 1	protein-coding
chr18-115	chr18	46200657	46200857	+	9.12	0.712	intron (NM_178872, intron 1 of 9)	intron (NM_178872, intron 1 of 9)	-1939	NM_001170855	28105	Mm.277382	NM_178872	ENSMUSG00000033949	Trim36	D18Wsu100e|haprin	tripartite motif-containing 36	protein-coding
chr11-414	chr11	69581138	69581338	+	9.12	0.714	intron (NM_001127233, intron 1 of 10)	intron (NM_001127233, intron 1 of 10)	879	NM_001127233	22059	Mm.222	NM_011640	ENSMUSG00000059552	Trp53	Tp53|bbl|bfy|bhy|p44|p53	transformation related protein 53	protein-coding
chr2-759	chr2	164868487	164868687	+	9.12	0.771	Intergenic	MTC|LTR|ERVL-MaLR	-10781	NM_146129	228866	Mm.241134	NM_146129	ENSMUSG00000039849	Pcif1	2310022K11Rik|C20orf67|F730014I05Rik	PDX1 C-terminal inhibiting factor 1	protein-coding
chrX-45	chrX	105926728	105926928	+	9.12	0.857	intron (NM_009530, intron 1 of 34)	(TC)n|Simple_repeat|Simple_repeat	2544	NM_009530	22589	Mm.10141	NM_009530	ENSMUSG00000031229	Atrx	4833408C14Rik|AI447451|ATR2|DXHXS6677E|HP1-BP38|Hp1bp2|Hp1bp38|MRXS3|RAD54L|Rad54|XH2|Xnp|ZNF-HX	alpha thalassemia/mental retardation syndrome X-linked	protein-coding
chr13-211	chr13	6890262	6890462	+	9.12	0.76	Intergenic	RLTR13C2|LTR|ERVK	-241591	NM_001291071	56421	Mm.273874	NM_019703	ENSMUSG00000021196	Pfkp	1200015H23Rik|9330125N24Rik|ATP-PFK|PFK-C|PFK-P	phosphofructokinase, platelet	protein-coding
chr6-733	chr6	121665124	121665324	+	9.12	0.889	intron (NM_175628, intron 22 of 35)	L1M3b|LINE|L1	29051	NM_175628	232345	Mm.30151	NM_175628	ENSMUSG00000030111	A2m	A2mp	alpha-2-macroglobulin	protein-coding
chr10-269	chr10	124838308	124838508	+	9.12	0.875	Intergenic	Intergenic	369334	NR_028310	75030	Mm.159403	NR_028310		4930503E24Rik	-	eukaryotic translation initiation factor 3, subunit I pseudogene	pseudo
chr9-157	chr9	56015230	56015430	+	9.12	0.9	Intergenic	L1Md_A|LINE|L1	-12306	NR_033529	665005	Mm.384788	NR_033529		Gm7444	EG665005	ring finger protein 19A pseudogene	pseudo
chr14-162	chr14	32818846	32819046	+	9.12	0.698	TTS (NM_001163616)	TTS (NM_001163616)	-15016	NM_001164485	105511	Mm.32231	NM_001164485	ENSMUSG00000078127	Fam170b	4922501K12Rik|AI449756	family with sequence similarity 170, member B	protein-coding
chr2-322	chr2	103605962	103606162	+	9.12	0.761	intron (NM_178890, intron 1 of 16)	MIRb|SINE|MIR	39752	NM_178890	99382	Mm.35850	NM_178890	ENSMUSG00000032724	Abtb2	AW539457|BPOZ-2	ankyrin repeat and BTB (POZ) domain containing 2	protein-coding
chr7-302	chr7	24481534	24481734	+	9.12	0.809	promoter-TSS (NM_153112)	promoter-TSS (NM_153112)	-389	NM_153112	260299	Mm.178322	NM_153112	ENSMUSG00000054793	Cadm4	Igdf4c|Igsf4c|Tsll2	cell adhesion molecule 4	protein-coding
chr13-261	chr13	89834567	89834767	+	9.12	0.76	Intergenic	RLTR31A_Mm|LTR|ERVK	-92155	NM_001134475	13003	Mm.158700	NM_019389	ENSMUSG00000021614	Vcan	5430420N07Rik|9430051N09|Cspg2|DPEAAE|NG2|PG-M|PG-M(V0)|PG-M(V1)|hdf	versican	protein-coding
chrUn_GL456370-1	chrUn_GL456370	11394	11594	+	9.12	0.685	NA	Intergenic	NA	NA
chr11-354	chr11	103692570	103692770	+	9.12	0.729	intron (NM_019650, intron 1 of 5)	L1M5|LINE|L1	5040	NM_019650	56494	Mm.195451	NM_019650	ENSMUSG00000020946	Gosr2	2310032N09Rik|C76855|Gs27|SNARE|membrin	golgi SNAP receptor complex member 2	protein-coding
chr11-302	chr11	69058414	69058614	+	9.12	0.8	Intergenic	B1_Mur3|SINE|Alu	-1261	NM_028005	71923	Mm.340257	NM_028005	ENSMUSG00000045176	Borcs6	2310047M10Rik	BLOC-1 related complex subunit 6	protein-coding
chr6-479	chr6	17544495	17544695	+	9.12	0.875	intron (NM_008591, intron 12 of 21)	intron (NM_008591, intron 12 of 21)	80638	NM_008591	17295	Mm.86844	NM_008591	ENSMUSG00000009376	Met	AI838057|HGF|HGFR|Par4|c-Met	met proto-oncogene	protein-coding
chr4-208	chr4	123914587	123914787	+	9.12	0.702	Intergenic	Intergenic	-2746	NM_017475	54170	Mm.220922	NM_017475	ENSMUSG00000028646	Rragc	AU041672|Gtr2|RAGC|TIB929|YGR163W	Ras-related GTP binding C	protein-coding
chr6-267	chr6	30173427	30173627	+	9.12	0.635	intron (NR_126541, intron 1 of 1)	CpG	598	NR_126540	101447999		NR_126540		Mirc35hg	-	microRNA cluster 35, host gene	ncRNA
chr2-261	chr2	119601550	119601750	+	9.12	0.843	TTS (NR_015473)	TTS (NR_015473)	7354	NR_015473	66602	Mm.379181	NR_015473	ENSMUSG00000085438	1700020I14Rik	1190006L01Rik|4933437I03Rik|AI451541|AI585852|AW538376|AW558897|Cyrano	RIKEN cDNA 1700020I14 gene	ncRNA
chr10-256	chr10	59741732	59741932	+	9.12	0.783	intron (NM_001291443, intron 4 of 12)	L1M4|LINE|L1	39269	NM_001291443	216001	Mm.27199	NM_144822	ENSMUSG00000020111	Micu1	C730016L05Rik|Calc|Cbara1	mitochondrial calcium uptake 1	protein-coding
chr11-297	chr11	26824237	26824437	+	9.12	0.75	Intergenic	Intergenic	39229	NR_002890	654472	Mm.347777	NR_002890		Gm12070	OTTMUSG00000005300	glyceraldehyde-3-phosphate dehydrogenase pseudogene	pseudo
chr10-516	chr10	41611789	41611989	+	9.12	0.75	Intergenic	Intergenic	-5294	NM_001303469	75973	Mm.228517	NM_029493	ENSMUSG00000075225	Ccdc162	5033413D22Rik|Ccdc162p|Gm29096|Gm61|Gm6976	coiled-coil domain containing 162	protein-coding
chr2-198	chr2	103655734	103655934	+	9.12	0.698	intron (NM_178890, intron 1 of 16)	intron (NM_178890, intron 1 of 16)	89524	NM_178890	99382	Mm.35850	NM_178890	ENSMUSG00000032724	Abtb2	AW539457|BPOZ-2	ankyrin repeat and BTB (POZ) domain containing 2	protein-coding
chr3-164	chr3	9154319	9154519	+	9.12	0.769	Intergenic	Intergenic	92455	NR_040597	75149	Mm.399324	NR_040597	ENSMUSG00000103116	4930539M17Rik	-	RIKEN cDNA 4930539M17 gene	ncRNA
chr9-203	chr9	63731364	63731564	+	9.12	0.667	intron (NM_016769, intron 1 of 8)	intron (NM_016769, intron 1 of 8)	26530	NM_016769	17127	Mm.7320	NM_016769	ENSMUSG00000032402	Smad3	AU022421|Madh3	SMAD family member 3	protein-coding
chr12-1028	chr12	64947121	64947321	+	9.12	0.84	intron (NM_025707, intron 4 of 4)	intron (NM_025707, intron 4 of 4)	18315	NM_025707	66689	Mm.248678	NM_025707	ENSMUSG00000020948	Klhl28	2810440N09Rik|4122402F11Rik|4931401E10Rik|Btbd5	kelch-like 28	protein-coding
chr2-289	chr2	117261149	117261349	+	9.12	0.739	intron (NM_026620, intron 4 of 7)	intron (NM_026620, intron 4 of 7)	11510	NM_026620	68215	Mm.219389	NM_026620	ENSMUSG00000027349	Fam98b	2610510H03Rik	family with sequence similarity 98, member B	protein-coding
chr6-899	chr6	17836692	17836892	+	9.12	0.775	intron (NM_001289625, intron 3 of 15)	intron (NM_001289625, intron 3 of 15)	87622	NM_022332	64213	Mm.12051	NM_022332	ENSMUSG00000029534	St7	9430001H04Rik|Fam4a2|HELG|RAY1|SEN4|TSG7	suppression of tumorigenicity 7	protein-coding
chr1-362	chr1	171619218	171619418	+	9.12	0.714	Intergenic	Intergenic	-11908	NM_008534	17085	Mm.560	NM_008534	ENSMUSG00000004707	Ly9	AI893573|CD229|Lgp100|Ly-9|SLAMF3|T100	lymphocyte antigen 9	protein-coding
chr14-218	chr14	57525873	57526073	+	9.12	0.872	intron (NM_145837, intron 2 of 2)	intron (NM_145837, intron 2 of 2)	1144	NM_145837	239114	Mm.390726	NM_145837	ENSMUSG00000050222	Il17d	AI462269|IL-17D	interleukin 17D	protein-coding
chr10-321	chr10	24753529	24753729	+	9.12	0.745	Intergenic	Intergenic	-41470	NM_008813	18605	Mm.27254	NM_008813	ENSMUSG00000037370	Enpp1	4833416E15Rik|AI428932|C76301|CD203c|E-NPP 1|E-NPP1|Ly-41|M6S1|NPP1|Npps|PC-1|Pca|Pca-1|Pdnp1|ttw|twy	ectonucleotide pyrophosphatase/phosphodiesterase 1	protein-coding
chr9-210	chr9	99377843	99378043	+	9.12	0.627	Intergenic	RMER17C|LTR|ERVK	-19413	NM_177775	272636	Mm.490440	NM_177775	ENSMUSG00000037681	Esyt3	D930024E11|D9Ertd280e|Fam62c|mKIAA4186	extended synaptotagmin-like protein 3	protein-coding
chr12-899	chr12	80347586	80347786	+	9.12	0.875	intron (NM_177267, intron 8 of 8)	B2_Mm1t|SINE|B2	43991	NR_037207	100526530		NR_037207	ENSMUSG00000105972	Mir1843a	Mir1843|mir-1843a|mmu-mir-1843|mmu-mir-1843a	microRNA 1843a	ncRNA
chr7-348	chr7	12010627	12010827	+	9.12	0.685	Intergenic	Intergenic	-30572	NM_001166731	628946	Mm.484974	NM_001166731	ENSMUSG00000095864	Vmn1r77	Gm6935	vomeronasal 1 receptor 77	protein-coding
chr19-126	chr19	8941524	8941724	+	9.12	0.766	promoter-TSS (NM_011842)	promoter-TSS (NM_011842)	-296	NM_011842	23942	Mm.25339	NM_011842	ENSMUSG00000071646	Mta2	AW550797|Mata1l1|Mta1l1|mmta2	metastasis-associated gene family, member 2	protein-coding
chr2-385	chr2	144393764	144393964	+	9.12	0.638	exon (NM_181417, exon 7 of 11)	exon (NM_181417, exon 7 of 11)	24829	NM_181417	228714	Mm.227925	NM_181417	ENSMUSG00000027425	Csrp2bp	2510008M08Rik|ATAC2|AU023459|D2Ertd473e|D2Wsu131e|E430020F17|Kat14	cysteine and glycine-rich protein 2 binding protein	protein-coding
chr16-222	chr16	55594396	55594596	+	9.12	0.796	Intergenic	L1Md_F|LINE|L1	99765	NR_039578	100628589		NR_039578	ENSMUSG00000093292	Mir5118	mmu-mir-5118|mu-mir-5118	microRNA 5118	ncRNA
chr2-446	chr2	164876654	164876854	+	9.12	0.692	Intergenic	Intergenic	-2614	NM_146129	228866	Mm.241134	NM_146129	ENSMUSG00000039849	Pcif1	2310022K11Rik|C20orf67|F730014I05Rik	PDX1 C-terminal inhibiting factor 1	protein-coding
chr15-206	chr15	8662896	8663096	+	9.12	0.766	intron (NM_148938, intron 3 of 9)	intron (NM_148938, intron 3 of 9)	47811	NM_148938	20512	Mm.204834	NM_148938	ENSMUSG00000005360	Slc1a3	AI504299|B430115D02Rik|Eaat1|GLAST|GLAST-1|GLU-T|GluT-1|Gmt1|MGluT1	solute carrier family 1 (glial high affinity glutamate transporter), member 3	protein-coding
chr4-243	chr4	146486589	146486789	+	9.12	0.745	Intergenic	Intergenic	-15311	NM_001243138	100041433	Mm.441741	NM_001243138	ENSMUSG00000056300	Zfp981	Gm13247|OTTMUSG00000011075	zinc finger protein 981	protein-coding
chr4-518	chr4	147404399	147404599	+	9.12	0.75	intron (NM_001039209, intron 1 of 2)	B1_Mur3|SINE|Alu	-148778	NM_001014397	433804	Mm.332047	NM_001014397	ENSMUSG00000065999	Zfp985	Gm13154|OTTMUSG00000010673	zinc finger protein 985	protein-coding
chr6-436	chr6	54326692	54326892	+	9.12	0.805	promoter-TSS (NM_030024)	promoter-TSS (NM_030024)	-220	NM_030024	78004	Mm.41984	NM_030024	ENSMUSG00000045725	Prr15	E130201N16Rik|G90	proline rich 15	protein-coding
chr8-349	chr8	128059702	128059902	+	9.12	0.613	Intergenic	Intergenic	218423	NR_105822	102465212		NR_105822	ENSMUSG00000099326	Mir21c	Gm28013|mmu-mir-21c	microRNA 21c	ncRNA
chr12-291	chr12	32900961	32901161	+	9.12	0.826	Intergenic	ORR1E|LTR|ERVL-MaLR	52728	NR_044986	74076	Mm.50114	NR_044986	ENSMUSG00000097494	4933406C10Rik	-	RIKEN cDNA 4933406C10 gene	ncRNA
chr4-391	chr4	146435515	146435715	+	9.12	0.702	intron (NM_001083918, intron 3 of 6).2	L1M4|LINE|L1	-13415	NM_001085522	433791	Mm.276881	NM_001085522	ENSMUSG00000070605	Zfp992	Gm13251|OTTMUSG00000011097	zinc finger protein 992	protein-coding
chr1-584	chr1	173990936	173991136	+	9.12	0.745	Intergenic	L1Md_F2|LINE|L1	-8192	NM_011940	26388	Mm.218770	NM_008327	ENSMUSG00000026535	Ifi202b	Ifbip-1|Ifi202|Ifi202a|p202	interferon activated gene 202B	protein-coding
chr1-585	chr1	175497365	175497565	+	9.12	0.837	Intergenic	Intergenic	-4920	NM_001199003	24012	Mm.7956	NM_011880	ENSMUSG00000026527	Rgs7	-	regulator of G protein signaling 7	protein-coding
chr6-894	chr6	148715171	148715371	+	9.12	0.625	Intergenic	Intergenic	-37271	NR_131024	75831	Mm.159595	NR_131024	ENSMUSG00000084909	4930528G23Rik	-	RIKEN cDNA 4930528G23 gene	ncRNA
chr2-376	chr2	117781632	117781832	+	9.12	0.75	Intergenic	Intergenic	31070	NR_126427	100504728	Mm.413174	NR_126427		Gm13985	OTTMUSG00000015235	predicted gene 13985	ncRNA
chr2-275	chr2	23057393	23057593	+	9.12	0.698	Intergenic	Intergenic	-10708	NM_028793	74159	Mm.181973	NM_028793	ENSMUSG00000026781	Acbd5	1300014E15Rik	acyl-Coenzyme A binding domain containing 5	protein-coding
chr7-148	chr7	128062886	128063086	+	9.12	0.614	intron (NM_001082960, intron 1 of 29)	RSINE1|SINE|B4	346	NM_008401	16409	Mm.262106	NM_008401	ENSMUSG00000030786	Itgam	CD11b/CD18|CR3|CR3A|Cd11b|F730045J24Rik|Ly-40|MAC1|Mac-1|Mac-1a	integrin alpha M	protein-coding
chr12-774	chr12	91391298	91391498	+	9.12	0.818	Intergenic	L1MEc|LINE|L1	-6989	NM_181815	75216	Mm.312204	NM_181815	ENSMUSG00000061533	Cep128	4930534B04Rik|5430424K18Rik|AI449708|AI480494|E230024F20	centrosomal protein 128	protein-coding
chr3-590	chr3	128035749	128035949	+	9.12	0.81	Intergenic	Lx9|LINE|L1	119678	NR_040552	329753	Mm.119720	NR_040552	ENSMUSG00000104763	9830132P13Rik	9830132P13	RIKEN cDNA 9830132P13 gene	ncRNA
chr16-183	chr16	29911288	29911488	+	9.12	0.667	Intergenic	Intergenic	67736	NR_037689	328657	Mm.425982	NM_001033403		Gm1968	-	predicted gene 1968	ncRNA
chr18-64	chr18	82475398	82475598	+	9.12	0.632	intron (NM_010777, intron 1 of 6)	intron (NM_010777, intron 1 of 6)	375	NM_001025245	17196	Mm.252063	NM_010777	ENSMUSG00000041607	Mbp	C76307|Hmbpr|R75289|golli-mbp|jve|mld|shi	myelin basic protein	protein-coding
chr2-371	chr2	102831261	102831461	+	9.12	0.686	exon (NM_001177786, exon 8 of 12)	exon (NM_001177786, exon 8 of 12)	70304	NM_001177785	12505	Mm.423621	NM_009851	ENSMUSG00000005087	Cd44	AU023126|AW121933|AW146109|HERMES|Ly-24|Pgp-1	CD44 antigen	protein-coding
chr8-530	chr8	38114451	38114651	+	9.12	0.756	intron (NM_145841, intron 1 of 7)	intron (NM_145841, intron 1 of 7)	137651	NR_029884	723860		NR_029884	ENSMUSG00000065457	Mir383	Mirn383|mir-383|mmu-mir-383	microRNA 383	ncRNA
chr2-196	chr2	90648052	90648252	+	9.12	0.556	Intergenic	B3|SINE|B2	-29063	NM_021512	59015	Mm.24532	NM_021512	ENSMUSG00000051329	Nup160	160kDa|2810011M03Rik|AA414952|AU020188|Gtl-13|Gtl1-13|Gtl13|mKIAA0197	nucleoporin 160	protein-coding
chr18-241	chr18	74444076	74444276	+	9.12	0.867	intron (NM_201600, intron 1 of 38)	intron (NM_201600, intron 1 of 38)	1557	NM_201600	17919	Mm.260098	NM_008661	ENSMUSG00000025885	Myo5b	AI661750|mKIAA1119	myosin VB	protein-coding
chr9-412	chr9	14277256	14277456	+	9.12	0.814	intron (NM_030261, intron 1 of 9)	intron (NM_030261, intron 1 of 9)	1055	NM_030261	75747	Mm.325126	NM_030261	ENSMUSG00000032009	Sesn3	5630400E15Rik|BC003348|SEST3	sestrin 3	protein-coding
chr7-231	chr7	120834529	120834729	+	8.86	0.744	Intergenic	GA-rich|Low_complexity|Low_complexity	-8202	NM_007908	13631	Mm.25997	NM_007908	ENSMUSG00000035064	Eef2k	C86191|eEF-2K	eukaryotic elongation factor-2 kinase	protein-coding
chr6-538	chr6	133978898	133979098	+	8.86	0.714	Intergenic	(TAGA)n|Simple_repeat|Simple_repeat	-56702	NM_001303102	14011	Mm.269995	NM_007961	ENSMUSG00000030199	Etv6	AW123102|AW557856|Tel	ets variant 6	protein-coding
chr3-318	chr3	133624420	133624620	+	8.86	0.892	Intergenic	Intergenic	-80130	NM_001040400	214133	Mm.347816	NM_145989	ENSMUSG00000040943	Tet2	Ayu17-449|E130014J05Rik|mKIAA1546	tet methylcytosine dioxygenase 2	protein-coding
chr5-476	chr5	19858068	19858268	+	8.86	0.864	intron (NM_001170746, intron 2 of 22)	intron (NM_001170746, intron 2 of 22)	-49350	NM_001170745	50791	Mm.332231	NM_015823	ENSMUSG00000040003	Magi2	AIP-1|Acvri1|Acvrinp1|Acvrip1|Magi-2|S-SCAM|mKIAA0705	membrane associated guanylate kinase, WW and PDZ domain containing 2	protein-coding
chr17-131	chr17	31392169	31392369	+	8.86	0.727	intron (NM_001163748, intron 1 of 18)	MTD|LTR|ERVL-MaLR	6035	NM_001163748	18585	Mm.10812	NM_008804	ENSMUSG00000041119	Pde9a	PDE9A1	phosphodiesterase 9A	protein-coding
chr15-237	chr15	17596829	17597029	+	8.86	0.8	Intergenic	Intergenic	772698	NR_045711	70886	Mm.399021	NR_045711		4921515E04Rik	-	RIKEN cDNA 4921515E04 gene	ncRNA
chr16-112	chr16	36420964	36421164	+	8.86	0.667	Intergenic	Intergenic	-12701	NM_001082545	20862	Mm.359610	NM_001082545	ENSMUSG00000022902	Stfa2	Stf2	stefin A2	protein-coding
chr16-118	chr16	16808231	16808431	+	8.86	0.804	intron (NM_015773, intron 2 of 10)	(TTC)n|Simple_repeat|Simple_repeat	11865	NM_001258458	665562	Mm.444358	NM_001258458		Rpl31-ps12	EG665562|Gm7689	ribosomal protein L31, pseudogene 1 2	protein-coding
chr2-193	chr2	28916307	28916507	+	8.86	0.825	promoter-TSS (NM_001164186)	promoter-TSS (NM_001164186)	14	NM_019446	54422	Mm.21390	NM_019446	ENSMUSG00000026805	Barhl1	Dres115|MBH2	BarH-like 1 (Drosophila)	protein-coding
chr1-330	chr1	161057227	161057427	+	8.86	0.8	intron (NM_172644, intron 8 of 16)	RSINE1|SINE|B4	13333	NM_172644	226539	Mm.28125	NM_172644	ENSMUSG00000026709	Dars2	5830468K18Rik|aspRS	aspartyl-tRNA synthetase 2 (mitochondrial)	protein-coding
chr4-297	chr4	41602941	41603141	+	8.86	0.694	intron (NM_175138, intron 6 of 19)	intron (NM_175138, intron 6 of 19)	33247	NM_175138	68922	Mm.79127	NM_175138	ENSMUSG00000061322	Dnaic1	1110066F04Rik|BB124644|Dnai1|b2b1526Clo	dynein, axonemal, intermediate chain 1	protein-coding
chr6-336	chr6	129987821	129988021	+	8.86	0.714	intron (NM_013793, intron 6 of 7)	intron (NM_013793, intron 6 of 7)	39033	NM_008464	16637	Mm.14112	NM_008464	ENSMUSG00000061769	Klra6	Ly49f|ly-49f	killer cell lectin-like receptor, subfamily A, member 6	protein-coding
chr3-145	chr3	35732409	35732609	+	8.86	0.661	Intergenic	Intergenic	-21629	NM_029570	76295	Mm.239416	NM_029570	ENSMUSG00000037400	Atp11b	1110019I14Rik|ATPIF|ATPIR|mKIAA0956	ATPase, class VI, type 11B	protein-coding
chr11-420	chr11	72800213	72800413	+	8.86	0.895	intron (NM_001045536, intron 1 of 54)	PB1D7|SINE|Alu	4087	NM_001045536	195018	Mm.272030	NM_001045536	ENSMUSG00000055670	Zzef1	8430405D05Rik|BC051585|C130099L13Rik|C85424|NSPA|mKIAA0399	zinc finger, ZZ-type with EF hand domain 1	protein-coding
chr16-187	chr16	35765713	35765913	+	8.86	0.773	intron (NM_153550, intron 1 of 8)	intron (NM_153550, intron 1 of 8)	3543	NM_153550	224132	Mm.24094	NM_153550	ENSMUSG00000022848	Dirc2	RCC4	disrupted in renal carcinoma 2 (human)	protein-coding
chr3-179	chr3	9128463	9128663	+	8.86	0.792	Intergenic	Intergenic	66599	NR_040597	75149	Mm.399324	NR_040597	ENSMUSG00000103116	4930539M17Rik	-	RIKEN cDNA 4930539M17 gene	ncRNA
chr18-131	chr18	56586572	56586772	+	8.86	0.721	intron (NM_001162989, intron 4 of 4)	intron (NM_001162989, intron 4 of 4)	-1676	NM_026099	67343	Mm.87057	NM_026099	ENSMUSG00000032900	Tex43	1700065I17Rik|Tseg7	testis expressed 43	protein-coding
chr1-409	chr1	161055998	161056198	+	8.86	0.791	intron (NM_172644, intron 9 of 16)	L1MA5|LINE|L1	14562	NM_172644	226539	Mm.28125	NM_172644	ENSMUSG00000026709	Dars2	5830468K18Rik|aspRS	aspartyl-tRNA synthetase 2 (mitochondrial)	protein-coding
chr12-476	chr12	34142731	34142931	+	8.86	0.732	intron (NM_001271386, intron 24 of 27)	A-rich|Low_complexity|Low_complexity	185160	NM_011658	22160	Mm.3280	NM_011658	ENSMUSG00000035799	Twist1	M-Twist|Pde|Ska10|Ska<m10Jus>|Twist|bHLHa38|pdt	twist basic helix-loop-helix transcription factor 1	protein-coding
chr2-546	chr2	4918434	4918634	+	8.86	0.723	promoter-TSS (NM_010726)	promoter-TSS (NM_010726)	-462	NM_010726	16922	Mm.391704	NM_010726	ENSMUSG00000026664	Phyh	AI256161|AI265699|Lnap1|PAHX	phytanoyl-CoA hydroxylase	protein-coding
chr7-484	chr7	38180952	38181152	+	8.86	0.761	Intergenic	ORR1A2|LTR|ERVL-MaLR	-2165	NM_001085385	72244	Mm.187554	NM_028166		1600014C10Rik	AI428873	RIKEN cDNA 1600014C10 gene	protein-coding
chr6-619	chr6	137581139	137581339	+	8.86	0.756	intron (NM_001271588, intron 1 of 20)	intron (NM_001271588, intron 1 of 20)	-10230	NM_001271587	13860	Mm.235346	NM_007945	ENSMUSG00000015766	Eps8	AW261790	epidermal growth factor receptor pathway substrate 8	protein-coding
chr3-376	chr3	60557187	60557387	+	8.86	0.857	intron (NM_001310514, intron 2 of 8)	intron (NM_001310514, intron 2 of 8)	56108	NM_001253708	56758	Mm.255723	NM_020007	ENSMUSG00000027763	Mbnl1	Mbnl|mKIAA0428	muscleblind-like 1 (Drosophila)	protein-coding
chr9-212	chr9	121887692	121887892	+	8.86	0.805	Intergenic	L1Md_F2|LINE|L1	-10563	NM_001276719	59289	Mm.258105	NM_021609	ENSMUSG00000044534	Ackr2	AI464239|CCR10|CCR9|Ccbp2|Cmkbr9|D6	atypical chemokine receptor 2	protein-coding
chr3-447	chr3	84831525	84831725	+	8.86	0.897	intron (NM_001177773, intron 1 of 13)	intron (NM_001177773, intron 1 of 13)	16048	NM_001177773	50754	Mm.196475	NM_080428	ENSMUSG00000028086	Fbxw7	1110001A17Rik|AGO|Cdc4|Fbw7|Fbwd6|Fbx30|Fbxo30|Fbxw6|SEL-10	F-box and WD-40 domain protein 7	protein-coding
chr12-854	chr12	35658930	35659130	+	8.86	0.711	Intergenic	Lx8b|LINE|L1	27274	NR_045051	71581	Mm.100110	NR_045050		9130015A21Rik	100043575|Gm4527	RIKEN cDNA 9130015A21 gene	ncRNA
chr18-291	chr18	23527663	23527863	+	8.86	0.857	intron (NM_001285807, intron 3 of 24)	intron (NM_001285807, intron 3 of 24)	30281	NM_001285810	13527	Mm.94371	NM_010087	ENSMUSG00000024302	Dtna	2210407P21Rik|DTN-A|Dtn|Gm19389|a-DB-1|adbn	dystrobrevin alpha	protein-coding
chr9-190	chr9	114795687	114795887	+	8.86	0.755	intron (NM_027294, intron 2 of 3)	intron (NM_027294, intron 2 of 3)	-13794	NM_001252479	102545	Mm.35600	NM_133978	ENSMUSG00000032436	Cmtm7	AI481279|Cklfsf7|LNV	CKLF-like MARVEL transmembrane domain containing 7	protein-coding
chr4-309	chr4	72404147	72404347	+	8.86	0.868	Intergenic	L1Md_T|LINE|L1	203003	NR_027923	68285	Mm.37541	NR_027923		C630043F03Rik	AI851307	RIKEN cDNA C630043F03 gene	ncRNA
chr7-244	chr7	47013324	47013524	+	8.86	0.739	Intergenic	Intergenic	-5010	NM_175318	101685	Mm.155687	NM_175318	ENSMUSG00000049516	Spty2d1	5830435K17Rik|AI852426|P16H6	SPT2, Suppressor of Ty, domain containing 1 (S. cerevisiae)	protein-coding
chr1-221	chr1	59401167	59401367	+	8.86	0.723	Intergenic	Intergenic	-80880	NM_008057	14369	Mm.297906	NM_008057	ENSMUSG00000041075	Fzd7	Fz7	frizzled class receptor 7	protein-coding
chr3-487	chr3	9762754	9762954	+	8.86	0.769	intron (NM_053182, intron 1 of 7)	intron (NM_053182, intron 1 of 7)	70825	NM_053182	94212	Mm.23897	NM_053182	ENSMUSG00000027508	Pag1	Cbp|F730007C19Rik|Pag	phosphoprotein associated with glycosphingolipid microdomains 1	protein-coding
chr1-352	chr1	105709540	105709740	+	8.86	0.682	intron (NM_029349, intron 10 of 27)	intron (NM_029349, intron 10 of 27)	45779	NM_173187	227446	Mm.337339	NM_029349	ENSMUSG00000026319	2310035C23Rik	6430401N10|Kiaa1468|mKIAA1468	RIKEN cDNA 2310035C23 gene	protein-coding
chr2-321	chr2	103565777	103565977	+	8.86	0.614	promoter-TSS (NM_178890)	promoter-TSS (NM_178890)	-433	NM_178890	99382	Mm.35850	NM_178890	ENSMUSG00000032724	Abtb2	AW539457|BPOZ-2	ankyrin repeat and BTB (POZ) domain containing 2	protein-coding
chr8-365	chr8	71813413	71813613	+	8.86	0.776	Intergenic	ERVB4_2-I_MM-int|LTR|ERVK	-68555	NM_145624	236193	Mm.290790	NM_145624	ENSMUSG00000056019	Zfp709	BC021921|GIOT-4|HIT-40	zinc finger protein 709	protein-coding
chr2-197	chr2	92669614	92669814	+	8.86	0.821	Intergenic	ETnERV-int|LTR|ERVK	70007	NM_023850	76969	Mm.38021	NM_023850	ENSMUSG00000027221	Chst1	2610008E20Rik|AW125896|C6ST|GST-1|Gst1|KSGAL6ST	carbohydrate (keratan sulfate Gal-6) sulfotransferase 1	protein-coding
chr4-404	chr4	9610159	9610359	+	8.86	0.783	intron (NM_023066, intron 4 of 23)	intron (NM_023066, intron 4 of 23)	33458	NM_001177853	65973	Mm.222206	NM_023066	ENSMUSG00000028207	Asph	2310005F16Rik|3110001L23Rik|AI848629|AW261690|AW561901|BAH|C79816|cI-37	aspartate-beta-hydroxylase	protein-coding
chr1-555	chr1	124001741	124001941	+	8.86	0.809	intron (NM_199021, intron 1 of 25)	intron (NM_199021, intron 1 of 25)	43718	NM_199021	269109	Mm.417716	NM_199021	ENSMUSG00000036815	Dpp10	6430601K09Rik|DPP X|Dprp3	dipeptidylpeptidase 10	protein-coding
chr13-121	chr13	24767821	24768021	+	8.86	0.75	Intergenic	MMETn-int|LTR|ERVK	-5984	NM_020567	57441	Mm.12239	NM_020567	ENSMUSG00000006715	Gmnn	AW546347|Gem	geminin	protein-coding
chr10-179	chr10	57794888	57795088	+	8.86	0.796	intron (NM_020561, intron 1 of 7)	CpG	444	NM_020561	57319	Mm.2379	NM_020561	ENSMUSG00000019872	Smpdl3a	0610010C24Rik|AI529588|ASM3A|ASML3|ASML3A	sphingomyelin phosphodiesterase, acid-like 3A	protein-coding
chr8-483	chr8	86121406	86121606	+	8.86	0.822	Intergenic	L1_Mus3|LINE|L1	280504	NM_199446	102093	Mm.237296	NM_199446	ENSMUSG00000036879	Phkb	AI463271	phosphorylase kinase beta	protein-coding
chr2-200	chr2	151880315	151880515	+	8.86	0.636	Intergenic	Intergenic	-30917	NM_009641	11602	Mm.189536	NM_009641	ENSMUSG00000027460	Angpt4	ANG-3|ANG-4|Agpt4|Ang3	angiopoietin 4	protein-coding
chr15-334	chr15	89130975	89131175	+	8.86	0.7	3' UTR (NM_013871, exon 12 of 12)	3' UTR (NM_013871, exon 12 of 12)	-2375	NR_028449	170787	Mm.203954	NM_199198	ENSMUSG00000062906	Hdac10	AW548891|Hd10	histone deacetylase 10	protein-coding
chr12-862	chr12	41990704	41990904	+	8.86	0.8	Intergenic	MLT1J|LTR|ERVL-MaLR	-504747	NM_010733	16981	Mm.404786	NM_010733	ENSMUSG00000036295	Lrrn3	NLRR-3	leucine rich repeat protein 3, neuronal	protein-coding
chr8-404	chr8	70718575	70718775	+	8.86	0.642	intron (NM_001195253, intron 1 of 3)	intron (NM_001195253, intron 1 of 3)	132	NM_001195253	100502950	Mm.52981	NM_001195253	ENSMUSG00000095026	Gm3336	100041434|2410018E23Rik	predicted gene 3336	protein-coding
chr10-145	chr10	112001745	112001945	+	8.86	0.696	Intergenic	Intergenic	-4581	NM_028608	73690	Mm.173790	NM_028608	ENSMUSG00000056888	Glipr1	2410114O14Rik|RTVP-1|RTVP1|mRTVP-1	GLI pathogenesis-related 1 (glioma)	protein-coding
chr15-274	chr15	66244240	66244440	+	8.86	0.9	intron (NM_152923, intron 1 of 14)	intron (NM_152923, intron 1 of 14)	41884	NM_152923	110862	Mm.255585	NM_152923	ENSMUSG00000056258	Kcnq3	-	potassium voltage-gated channel, subfamily Q, member 3	protein-coding
chr19-320	chr19	15327629	15327829	+	8.86	0.85	Intergenic	Intergenic	596893	NM_001205339	107272	Mm.289936	NM_177420	ENSMUSG00000024640	Psat1	D8Ertd814e|EPIP|PSA|Psat	phosphoserine aminotransferase 1	protein-coding
chr12-1345	chr12	95858634	95858834	+	8.86	0.791	Intergenic	MTD|LTR|ERVL-MaLR	166508	NM_201518	399558	Mm.341948	NM_201518	ENSMUSG00000047414	Flrt2	-	fibronectin leucine rich transmembrane protein 2	protein-coding
chr10-346	chr10	126987148	126987348	+	8.86	0.621	intron (NM_001113470, intron 1 of 7)	intron (NM_001113470, intron 1 of 7)	-8282	NR_029803	723962		NR_029803	ENSMUSG00000065430	Mir26a-2	Mirn26a-2|mir-26a-2	microRNA 26a-2	ncRNA
chr7-561	chr7	55856597	55856797	+	8.86	0.919	intron (NM_001164661, intron 2 of 31)	(TGAA)n|Simple_repeat|Simple_repeat	14626	NM_001164661	20430	Mm.37249	NM_011370	ENSMUSG00000030447	Cyfip1	E030028J09Rik|P140SRA-1|P140sra1|Shyc|Sra-1|Sra1|l(7)1Rl|l71Rl|l7Rl1|mKIAA0068|pl-1	cytoplasmic FMR1 interacting protein 1	protein-coding
chr12-516	chr12	95913118	95913318	+	8.86	0.706	Intergenic	L1_Mur2|LINE|L1	134004	NR_103800	69423	Mm.46121	NM_027076		1700019M22Rik	-	NFX-like protein	pseudo
[truncated: 1,735 more rows]
